# Supplementary material for: UPLC-ESI-MS/MS-Based Analysis of Various Edible Rosa Fruits Concerning Secondary Metabolites and Evaluation of Their Antioxidant Activities
Source: MDPI journal article supplement (doi:10.3390/foods13050796), 2024-03-04
Supplement: s1 [file s1]

**Table S1.** List of metabolites identified from RRT-F, RSS-F, RLM-F, RDP-F and RSL-F. (The letter "a, b, c, d" represent four biological replicates)

| Index  | Ionization model   | Q1 (Da) | Q3 (Da) | Molecular Weight (Da) | Formula   | Compounds                               | Classes    | Database    | CAS    | R    | R    | R    | R    | Proportion of peak area(%) | RS-S-Fa       | RS-S-Fb | RS-S-Fc | RS-S-Fd | Proportion of peak area(%) | RL-M-Fa       | RL-M-Fb | RL-M-Fc | RL-M-Fd | Proportion of peak area(%) | RD-P-Fa       | RDP-Fb | RDP-Fc | RDP-Fd  | Proportion of peak area(%) | RSL-Fa         | RS-L-Fb | RS-L-Fc | RS-L-Fd | Proportion of peak area(%) | cp_d_ID        | kegg_map |                           |
|--------|--------------------|---------|---------|-----------------------|-----------|-----------------------------------------|------------|-------------|--------|------|------|------|------|----------------------------|---------------|---------|---------|---------|----------------------------|---------------|---------|---------|---------|----------------------------|---------------|--------|--------|---------|----------------------------|----------------|---------|---------|---------|----------------------------|----------------|----------|---------------------------|
|        |                    |         |         |                       |           |                                         |            |             |        | T-Fa | T-Fb | T-Fc | T-Fd |                            |               |         |         |         |                            |               |         |         |         |                            |               |        |        |         |                            |                |         |         |         |                            |                |          |                           |
| km0071 | [M+H] <sup>+</sup> | 4.1     | 3.0     | 46.4                  | C21H20O12 | Quercetin 3-O-galactoside (Hyperin)     | Flavonoids | Biochanin P | 4836-0 | 2-0  | 0    | 0    | 0    | 0                          | 1.1976±0.7421 | 197000  | 176000  | 184000  | 195000                     | 0.5085±0.274  | 211000  | 8000    | 198000  | 199000                     | 0.5021±0.2614 | 503000 | 520000 | 5230000 | 530000                     | 0.7826±0.2345  | 2260000 | 24000   | 26000   | 234000                     | 0.5057±0.2333  | C10073   | --                        |
|        |                    | 5.1     | 3.0     | 46.4                  | C21H20O12 | Quercetin 3-O-galactoside (Hyperin)     | Flavonoids | Biochanin P | 4836-0 | 2-0  | 0    | 0    | 0    | 0                          | 1.1976±0.7421 | 197000  | 176000  | 184000  | 195000                     | 0.5085±0.274  | 211000  | 8000    | 198000  | 199000                     | 0.5021±0.2614 | 503000 | 520000 | 5230000 | 530000                     | 0.7826±0.2345  | 2260000 | 24000   | 26000   | 234000                     | 0.5057±0.2333  | C10073   | --                        |
|        |                    | 5.1     | 3.0     | 46.4                  | C21H20O12 | Quercetin 3-O-galactoside (Hyperin)     | Flavonoids | Biochanin P | 4836-0 | 2-0  | 0    | 0    | 0    | 0                          | 1.1976±0.7421 | 197000  | 176000  | 184000  | 195000                     | 0.5085±0.274  | 211000  | 8000    | 198000  | 199000                     | 0.5021±0.2614 | 503000 | 520000 | 5230000 | 530000                     | 0.7826±0.2345  | 2260000 | 24000   | 26000   | 234000                     | 0.5057±0.2333  | C10073   | --                        |
| km0080 | [M-H] <sup>-</sup> | 3.0     | 8.0     | 284.0                 | C16H12O5  | Biochanin A                             | Flavonoids | Biochanin P | 4980-5 | 1-8  | 0    | 5    | 4    | 7                          | 0.0002±0.0005 | 4890    | 4430    | 5300    | 4940                       | 0.0013±0.0008 | 1710    | 580     | 1580    | 1710                       | 0.0004±0.0001 | 31300  | 30200  | 29600   | 32200                      | 0.0046±0.0006  | 2060    | 1660    | 1650    | 2130                       | 0.0004±0.0006  | C00814   | ko00943,ko0101100,ko01110 |
|        |                    | 3.0     | 8.0     | 284.0                 | C16H12O5  | Biochanin A                             | Flavonoids | Biochanin P | 4980-5 | 1-8  | 0    | 5    | 4    | 7                          | 0.0002±0.0005 | 4890    | 4430    | 5300    | 4940                       | 0.0013±0.0008 | 1710    | 580     | 1580    | 1710                       | 0.0004±0.0001 | 31300  | 30200  | 29600   | 32200                      | 0.0046±0.0006  | 2060    | 1660    | 1650    | 2130                       | 0.0004±0.0006  | C00814   | ko00943,ko0101100,ko01110 |
|        |                    | 3.0     | 8.0     | 284.0                 | C16H12O5  | Biochanin A                             | Flavonoids | Biochanin P | 4980-5 | 1-8  | 0    | 5    | 4    | 7                          | 0.0002±0.0005 | 4890    | 4430    | 5300    | 4940                       | 0.0013±0.0008 | 1710    | 580     | 1580    | 1710                       | 0.0004±0.0001 | 31300  | 30200  | 29600   | 32200                      | 0.0046±0.0006  | 2060    | 1660    | 1650    | 2130                       | 0.0004±0.0006  | C00814   | ko00943,ko0101100,ko01110 |
| km0081 | [M+H] <sup>+</sup> | 1.1     | 3.0     | 270.0                 | C15H10O5  | Genistein (4',5,7-trihydroxyisoflavone) | Flavonoids | Biochanin P | 4472-0 | 6-3  | 3    | 3    | 3    | 3                          | 0.0026±0.0022 | 8070    | 5540    | 6750    | 6010                       | 0.0018±0.0003 | 18100   | 9300    | 16100   | 16100                      | 0.0042±0.0004 | 35300  | 51000  | 41000   | 48000                      | 0.0066±0.00105 | 40700   | 44300   | 51300   | 35100                      | 0.0089±0.00117 | C06563   | ko00943,ko0101100,ko01110 |
|        |                    | 1.1     | 3.0     | 270.0                 | C15H10O5  | Genistein (4',5,7-trihydroxyisoflavone) | Flavonoids | Biochanin P | 4472-0 | 6-3  | 3    | 3    | 3    | 3                          | 0.0026±0.0022 | 8070    | 5540    | 6750    | 6010                       | 0.0018±0.0003 | 18100   | 9300    | 16100   | 16100                      | 0.0042±0.0004 | 35300  | 51000  | 41000   | 48000                      | 0.0066±0.00105 | 40700   | 44300   | 51300   | 35100                      | 0.0089±0.00117 | C06563   | ko00943,ko0101100,ko01110 |
|        |                    | 1.1     | 3.0     | 270.0                 | C15H10O5  | Genistein (4',5,7-trihydroxyisoflavone) | Flavonoids | Biochanin P | 4472-0 | 6-3  | 3    | 3    | 3    | 3                          | 0.0026±0.0022 | 8070    | 5540    | 6750    | 6010                       | 0.0018±0.0003 | 18100   | 9300    | 16100   | 16100                      | 0.0042±0.0004 | 35300  | 51000  | 41000   | 48000                      | 0.0066±0.00105 | 40700   | 44300   | 51300   | 35100                      | 0.0089±0.00117 | C06563   |                           |

[illegible]



|    |     |    |    |     |     |            |      |    |    |   |   |   |       |       |    |    |    |       |       |     |    |     |        |        |     |     |      |       |       |    |    |    |        |            |            |
|----|-----|----|----|-----|-----|------------|------|----|----|---|---|---|-------|-------|----|----|----|-------|-------|-----|----|-----|--------|--------|-----|-----|------|-------|-------|----|----|----|--------|------------|------------|
| 07 | +H] | 4  | 8  | 8.0 | H20 | O-         | onoi | o  | 1  | 9 | 9 | 7 | 5±1.1 | 60    | 30 | 70 | 60 | 4±0.3 | 000   | 5   | 20 | 000 | ±0.867 | 000    | 000 | 000 | 000  | 9±0.4 | 000   | 90 | 00 | 00 | ±0.424 |            |            |
| 79 | +   | 9. | 7. | 0   | O11 | glucoside  | ds   | D  | 5  | 9 | 0 | 2 | 365   | 00    | 00 | 00 | 00 | 624   | 0     | 5   | 00 | 0   | 3      | 0      | 0   | 0   | 0    | 28    | 00    | 00 | 00 | 4  |        |            |            |
|    |     | 0  | 1  |     |     |            |      | e  | 0  | 0 | 0 | 0 |       | 0     | 0  | 0  | 0  |       |       | 0   | 0  |     |        |        |     |     |      | 0     | 0     | 0  |    |    |        |            |            |
|    |     | 0  | 0  |     |     |            |      | e  | 0  | 0 | 0 | 0 |       |       |    |    |    |       |       | 0   |    |     |        |        |     |     |      |       |       |    |    |    |        |            |            |
|    |     |    |    |     |     |            |      | p  | 0  | 0 | 0 | 0 |       |       |    |    |    |       |       | 0   |    |     |        |        |     |     |      |       |       |    |    |    |        |            |            |
|    |     |    |    |     |     |            |      |    | 0  | 0 | 0 | 0 |       |       |    |    |    |       |       | 0   |    |     |        |        |     |     |      |       |       |    |    |    |        |            |            |
|    |     |    |    |     |     |            |      |    | 1  | 1 | 1 | 2 |       |       |    |    |    |       |       | 5   |    |     |        |        |     |     |      |       |       |    |    |    |        |            |            |
|    |     |    |    |     |     |            |      | Bi | 9  | 9 | 8 | 0 |       |       |    |    |    |       |       | 2   |    |     |        |        |     |     |      |       |       |    |    |    |        |            |            |
|    |     | 3  | 1  |     |     |            |      | o  | 64 | 3 | 9 | 9 | 1     |       | 52 | 51 | 52 | 53    | 0.142 | 541 | 7  | 50  | 576    | 0.1306 | 197 | 182 | 1900 | 203   | 0.290 |    |    |    |        |            |            |
|    |     | 0  | 5  |     |     |            |      | D  | 72 | 0 | 0 | 0 | 0     |       | 70 | 70 | 40 | 50    | 2±0.0 | 000 | 0  | 60  | 000    | ±0.063 | 000 | 000 | 000  | 000   | 8±0.0 | 19 | 18 | 18 |        |            |            |
| km | [M  | 1. | 1. | 30  | C15 |            | Flav | e  | -  | 0 | 0 | 0 | 0     | 0.323 | 00 | 00 | 00 | 00    | 131   |     | 0  | 00  | 000    | 4      | 0   | 0   | 000  | 0     | 793   | 10 | 10 | 80 | 0.3932 | C1         |            |
| 08 | -   | 0  | 0  | 2.0 | H10 |            | onoi | e  | 38 | 0 | 0 | 0 | 0     | ±0.14 |    |    |    |       |       |     | 0  |     |        |        |     |     |      |       | 1960  | 00 | 00 | 00 | ±0.215 | 01         |            |
| 14 | H]- | 0  | 0  | 4   | O7  | Morin      | ds   | p  | -4 | 0 | 0 | 0 | 0     | 08    |    |    |    |       |       |     |    |     |        |        |     |     |      |       | 000   | 0  | 0  | 0  | 2      | 05         | --         |
|    |     |    |    |     |     | Myricetin  |      | Bi | 2  | 1 | 2 | 2 |       |       |    |    |    |       |       |     | 1  |     |        |        |     |     |      |       |       |    |    |    |        |            |            |
|    |     | 4  | 3  |     |     | 3-O-       |      | o  | 17 | 7 | 9 | 1 | 2     |       |    |    |    |       |       |     |    |     |        |        |     |     |      |       |       |    |    |    |        |            |            |
|    |     | 6  | 1  |     |     | rhamnosi   |      | D  | 91 | 6 | 1 | 6 | 0     |       | 74 | 68 | 57 | 56    | 0.017 | 256 | 8  | 21  | 207    | 0.0052 |     |     |      |       |       |    |    |    |        |            |            |
| km | [M  | 5. | 9. | 46  | C21 | de         | Flav | e  | 2- | 0 | 0 | 0 | 0     | 0.037 | 0  | 0  | 0  | 0     | 4±0.0 | 00  | 1  | 20  | 00     | ±0.006 |     |     |      |       |       |    |    |    | C1     |            |            |
| 08 | +H] | 1  | 0  | 4.1 | H20 | (Myricitri | onoi | e  | 87 | 0 | 0 | 0 | 0     | 5±0.0 |    |    |    |       | 256   |     | 0  | 0   |        | 8      |     |     |      |       |       |    |    |    | 01     |            |            |
| 18 | +   | 0  | 0  | 0   | O12 | n)         | ds   | p  | -7 | 0 | 0 | 0 | 0     | 935   |    |    |    |       |       |     |    |     |        |        |     |     |      |       |       |    |    |    | 08     | --         |            |
|    |     |    |    |     |     |            |      | Bi | 2  | 3 | 2 | 2 |       |       |    |    |    |       |       |     | 1  |     |        |        |     |     |      |       |       |    |    |    |        |            |            |
|    |     | 2  | 1  |     |     |            |      | o  | 9  | 1 | 8 | 9 |       |       |    |    |    |       |       |     | 6  |     |        |        |     |     |      |       |       |    |    |    |        |            |            |
|    |     | 7  | 5  |     |     |            |      | D  | 48 | 7 | 0 | 4 | 2     |       | 24 | 24 | 26 | 26    | 0.068 | 174 | 6  | 16  | 179    | 0.0417 | 645 | 650 | 6210 | 673   | 0.097 |    |    |    |        | ko00941,ko |            |
| km | [M  | 1. | 1. | 27  | C15 |            | Flav | e  | 0- | 0 | 0 | 0 | 0     | 0.048 | 10 | 40 | 60 | 60    | 8±0.0 | 000 | 0  | 80  | 000    | ±0.010 | 000 | 000 | 00   | 000   | 6±0.0 | 18 | 17 | 18 |        | C0         | 00943,ko01 |
| 08 | -   | 1  | 0  | 2.0 | H12 | Naringeni  | onoi | e  | 41 | 0 | 0 | 0 | 0     | 9±0.0 | 00 | 00 | 00 | 00    | 283   |     | 0  | 00  |        | 4      |     |     |      | 161   | 1750  | 00 | 50 | 10 | 0.037± | 05         | 100,ko0111 |
| 43 | H]- | 0  | 0  | 7   | O5  | n          | ds   | p  | -1 | 0 | 0 | 0 | 0     | 251   |    |    |    |       |       |     |    |     |        |        |     |     |      |       | 00    | 00 | 00 | 00 | 0.0142 | 09         | 0          |
|    |     |    |    |     |     |            |      | Bi | 3  | 3 | 3 | 3 |       |       |    |    |    |       |       |     | 1  |     |        |        |     |     |      |       |       |    |    |    |        |            |            |
|    |     | 2  | 1  |     |     |            |      | o  | 25 | 3 | 2 | 1 | 1     |       |    |    |    |       |       |     | 9  |     |        |        |     |     |      |       |       |    |    |    |        |            |            |
|    |     | 7  | 5  |     |     |            |      | D  | 51 | 5 | 7 | 7 | 8     |       | 28 | 28 | 28 | 29    | 0.077 | 184 | 0  | 18  | 189    | 0.0455 | 688 | 667 | 7070 | 745   | 0.105 |    |    |    |        | C0         | ko00941,ko |
| km | [M  | 1. | 1. | 27  | C15 | Naringeni  | Flav | e  | 5- | 0 | 0 | 0 | 0     | 0.053 | 70 | 30 | 40 | 70    | 8±0.0 | 000 | 0  | 50  | 000    | ±0.012 | 000 | 000 | 00   | 000   | 8±0.0 | 19 | 19 | 20 |        | C0         | ko00941,ko |
| 08 | -   | 1  | 0  | 2.0 | H12 | n          | onoi | e  | 46 | 0 | 0 | 0 | 0     | 6±0.0 | 00 | 00 | 00 | 00    | 135   |     | 0  | 00  |        | 4      |     |     |      | 322   | 1990  | 20 | 60 | 10 | 0.041± | 65         | 01100,ko01 |
| 49 | H]- | 0  | 0  | 7   | O5  | chalcone   | ds   | p  | -2 | 0 | 0 | 0 | 0     | 384   |    |    |    |       |       |     |    |     |        |        |     |     |      |       | 00    | 00 | 00 | 00 | 0.017  | 61         | 110        |
|    |     |    |    |     |     |            |      | Bi |    |   |   |   |       |       |    |    |    |       |       |     | 4  |     |        |        |     |     |      |       |       |    |    |    |        |            |            |
|    |     | 4  | 3  |     |     |            |      | o  | 32 | 5 | 4 | 4 | 4     |       |    |    |    |       |       |     |    |     |        |        |     |     |      |       |       |    |    |    |        |            |            |
|    |     | 0  | 7  |     |     |            |      | D  | 37 | 1 | 2 | 5 | 1     |       | 51 | 53 | 47 | 46    | 0.013 | 437 | 8  | 43  | 462    | 0.011± | 490 | 500 | 4540 | 469   | 0.007 |    |    |    |        | C1         |            |
| km | [M  | 3. | 3. | 40  | C21 |            | Flav | e  | -  | 5 | 2 | 7 | 3     | 0.007 | 0  | 0  | 0  | 0     | 5±0.0 | 00  | 1  | 00  | 00     | 0.0067 | 00  | 00  | 0    | 00    | 2±0.0 | 45 | 11 | 46 | 0.0126 |            |            |
| 08 | +H] | 1  | 0  | 2.1 | H22 |            | onoi | e  | 44 | 0 | 0 | 0 | 0     | 5±0.0 |    |    |    |       | 108   |     | 0  | 0   |        |        |     |     |      | 039   | 3940  | 30 | 40 | 90 | ±0.068 | 01         |            |
| 64 | +   | 0  | 0  | 3   | O8  | Nobiletin  | ds   | p  | -3 | 0 | 0 | 0 | 0     | 131   |    |    |    |       |       |     |    |     |        |        |     |     |      |       | 0     | 0  | 00 | 0  | 5      | 12         | --         |
|    |     | 1  | 1  |     |     |            |      | Bi | 2  | 2 | 2 | 2 |       |       |    |    |    |       |       |     | 2  |     |        |        |     |     |      |       |       |    |    |    |        |            |            |
|    |     | 5  | 1  |     |     |            |      | o  | 65 | 4 | 5 | 4 | 9     |       | 64 | 52 | 73 | 71    | 0.177 | 260 | 5  | 24  | 246    | 0.0614 | 432 | 454 | 4380 | 449   | 0.066 | 15 | 13 | 12 |        | C0         |            |
| km | [M  | 5. | 1. | 15  | C5H |            | Vita | D  | -  | 5 | 9 | 4 | 1     | 0.042 | 90 | 70 | 90 | 10    | 3±0.2 | 000 | 6  | 90  | 000    | ±0.016 | 000 | 000 | 00   | 000   | 8±0.0 | 80 | 50 | 70 | 0.3005 |            |            |
| 08 | -   | 0  | 0  | 6.0 | 4N2 | Orotic     | min  | e  | 86 | 0 | 0 | 0 | 0     | 9±0.0 | 00 | 00 | 00 | 00    | 292   |     | 0  | 00  |        |        |     |     |      | 222   | 1580  | 00 | 00 | 00 | ±0.345 | 02         | ko00240,ko |
| 79 | H]- | 0  | 0  | 2   | O4  | acid       | s    | e  | -1 | 0 | 0 | 0 | 0     | 421   |    |    |    |       |       |     |    |     |        |        |     |     |      |       | 000   | 0  | 0  | 0  | 8      | 95         | 01100      |

[illegible]

[illegible]

[illegible]

|    |     |    |    |     |     |            |      |    |    |   |   |   |       |       |    |    |    |       |       |     |    |     |        |        |     |      |      |       |       |      |    |    |        |        |   |   |
|----|-----|----|----|-----|-----|------------|------|----|----|---|---|---|-------|-------|----|----|----|-------|-------|-----|----|-----|--------|--------|-----|------|------|-------|-------|------|----|----|--------|--------|---|---|
| 00 | -   | 9  | 3  | 4.0 | H10 | Acid       | noli | o  | 5  | 5 | 3 | 6 | 1±0.0 | 80    | 60 | 20 | 30 | 6±0.0 | 000   | 4   | 50 | 000 | ±0.042 | 000    | 000 | 00   | 000  | 2±0.0 | 00    | 40   | 50 | 30 | ±0.058 | 04     |   |   |
| 00 | H]- | 3. | 4. | 6   | O4  |            | c    | D  | 9  | 9 | 8 | 8 | 649   | 00    | 00 | 00 | 00 | 216   |       | 1   | 00 |     | 3      |        |     |      |      | 172   |       | 00   | 00 | 00 | 2      | 70     |   |   |
| 53 |     | 0  | 0  |     |     |            | acid | e  | 0  | 0 | 0 | 0 |       |       |    |    |    |       |       | 0   |    |     |        |        |     |      |      |       |       |      |    |    |        |        |   |   |
|    |     | 6  | 0  |     |     |            | s    | e  | 0  | 0 | 0 | 0 |       |       |    |    |    |       |       | 0   |    |     |        |        |     |      |      |       |       |      |    |    |        |        |   |   |
|    |     |    |    |     |     |            |      | p  | 0  | 0 | 0 | 0 |       |       |    |    |    |       |       | 0   |    |     |        |        |     |      |      |       |       |      |    |    |        |        |   |   |
|    |     |    |    |     |     |            |      | Bi |    |   |   |   |       |       |    |    |    |       |       |     |    |     |        |        |     |      |      |       |       |      |    |    |        |        |   |   |
|    |     | 2  | 1  |     |     |            | Phe  | o  | 74 | 5 | 6 | 5 | 5     |       |    |    |    |       |       | 2   |    |     |        |        |     |      |      |       |       |      |    |    |        |        |   |   |
| kz |     | 3  | 0  |     |     | 3,4,5-     | noli | D  | 00 | 5 | 3 | 5 | 6     |       |    |    |    |       | 276   | 6   | 30 | 279 | 0.0007 | 607    | 554 | 4620 | 506  | 0.000 |       |      |    |    |        |        |   |   |
| 00 | [M  | 7. | 3. | 23  | C12 | Trimethox  | c    | e  | -  | 8 | 2 | 7 | 5     | 0.009 |    |    |    |       | 0     | 8   | 90 | 0   | ±0.000 | 5      | 0   | 0    |      | 8±0.0 |       | 32   | 33 | 32 | 0.0068 |        |   |   |
| 00 | -   | 0  | 0  | 8.0 | H14 | ycinnamic  | acid | e  | 08 | 0 | 0 | 0 | 0     | 5±0.0 |    |    |    |       |       | 0   |    |     |        |        |     |      |      |       | 3130  | 80   | 70 | 80 | ±0.001 |        |   |   |
| 55 | H]- | 8  | 0  | 8   | O5  | acid       | s    | p  | -0 | 0 | 0 | 0 | 0     | 046   | -  | -  | -  | -     | -     |     |    |     |        |        |     |      |      |       | 0     | 0    | 0  | 0  | 5      | -      | - |   |
|    |     |    |    |     |     |            |      | Bi | 1  | 2 | 1 | 1 |       |       |    |    |    |       |       | 4   |    |     |        |        |     |      |      |       |       |      |    |    |        |        |   |   |
|    |     | 2  | 1  |     |     |            | Phe  | o  | 9  | 0 | 8 | 8 |       |       |    |    |    |       |       | 6   |    |     |        |        |     |      |      |       |       |      |    |    |        |        |   |   |
| kz |     | 9  | 3  |     |     |            | noli | D  | 4  | 2 | 9 | 6 |       | 17    | 17 | 17 | 18 | 0.048 | 459   | 4   | 43 | 462 | 0.1104 | 368    | 321 | 3590 | 362  | 0.053 |       |      |    |    |        |        |   |   |
| 00 | [M  | 9. | 7. | 30  | C13 | Salicylic  | c    | e  |    | 0 | 0 | 0 | 0     | 0.031 | 90 | 70 | 00 | 60    | 2±0.0 | 000 | 0  | 20  | 000    | ±0.036 | 000 | 000  | 00   | 000   | 1±0.0 |      | 70 | 68 | 71     | 0.0145 |   |   |
| 00 | -   | 1  | 1  | 0.0 | H16 | acid       | acid | e  |    | 0 | 0 | 0 | 0     | 8±0.0 | 00 | 00 | 00 | 00    | 182   |     | 0  |     |        |        |     |      |      |       | 297   | 6840 | 90 | 70 | 40     | ±0.005 |   |   |
| 56 | H]- | 0  | 0  | 8   | O8  | glucoside  | s    | p  | -  | 0 | 0 | 0 | 0     | 171   |    |    |    |       |       | 0   |    |     |        |        |     |      |      |       | 0     | 0    | 0  | 0  | 9      | -      | - |   |
|    |     |    |    |     |     |            |      |    | 1  |   |   |   |       |       |    |    |    |       |       |     |    |     |        |        |     |      |      |       |       |      |    |    |        |        |   |   |
|    |     |    |    |     |     |            |      | Bi | 13 | 0 | 9 | 9 | 8     |       |    |    |    |       |       | 8   |    |     |        |        |     |      |      |       |       |      |    |    |        |        |   |   |
|    |     | 3  | 1  |     |     |            | Phe  | o  | 78 | 1 | 1 | 7 | 8     |       | 11 | 11 | 10 | 11    | 0.305 | 4   |    |     |        |        |     |      |      |       |       |      |    |    |        |        |   |   |
| kz |     | 1  | 5  |     |     | Protocate  | noli | D  | 87 | 0 | 4 | 0 | 3     |       | 30 | 10 | 80 | 90    | ±0.11 | 771 | 2  | 80  | 876    | 0.2002 | 673 | 712  | 6010 | 642   | 0.099 |      |    |    |        |        |   |   |
| 00 | [M  | 5. | 3. | 31  | C13 | chuic acid | c    | e  | -  | 0 | 0 | 0 | 0     | 0.156 | 00 | 00 | 00 | 00    | 78    | 000 | 0  | 30  | 000    | ±0.124 | 000 | 000  | 00   | 000   | 1±0.0 |      | 53 | 50 | 54     | 0.0102 |   |   |
| 00 | -   | 1  | 1  | 6.0 | H16 | O-         | acid | e  | 25 | 0 | 0 | 0 | 0     | 3±0.1 | 0  | 0  | 0  | 0     |       |     |    |     |        |        |     |      |      |       |       | 3810 | 10 | 30 | 50     | ±0.015 |   |   |
| 58 | H]- | 0  | 0  | 8   | O9  | glucoside  | s    | p  | -3 | 0 | 0 | 0 | 0     | 846   |    |    |    |       |       | 0   |    |     |        |        |     |      |      |       |       | 0    | 0  | 0  | 0      | 6      | - | - |
|    |     |    |    |     |     |            |      | Bi |    |   |   |   |       |       |    |    |    |       |       |     |    |     |        |        |     |      |      |       |       |      |    |    |        |        |   |   |
|    |     | 3  | 1  |     |     |            | Phe  | o  | 5  | 6 | 4 | 5 |       |       |    |    |    |       |       | 4   |    |     |        |        |     |      |      |       |       |      |    |    |        |        |   |   |
| kz |     | 1  | 4  |     |     | 3-O-p-     | noli | D  | 6  | 1 | 8 | 2 |       | 16    | 14 | 17 | 15 | 0.043 |       |     |    |     |        |        |     |      |      |       |       |      |    |    |        |        |   |   |
| 00 | [M  | 9. | 5. | 32  | C16 | Coumaroy   | c    | e  |    | 1 | 9 | 8 | 8     | 0.009 | 80 | 90 | 00 | 90    | 7±0.0 |     |    |     |        |        |     |      |      |       |       |      |    |    |        |        |   |   |
| 00 | -   | 0  | 1  | 0.0 | H16 | Ishikimic  | acid | e  |    | 0 | 0 | 0 | 0     | 1±0.0 | 00 | 00 | 00 | 00    | 221   |     |    |     |        |        |     |      |      |       |       |      |    |    |        |        |   |   |
| 59 | H]- | 0  | 0  | 9   | O7  | acid       | s    | p  | -  | 0 | 0 | 0 | 0     | 106   |    |    |    |       |       | -   | -  | -   | -      | -      |     |      |      |       |       | 7470 | 0  | 0  | 0      | 9      | - | - |
|    |     |    |    |     |     |            |      | Bi |    |   |   |   |       |       |    |    |    |       |       |     |    |     |        |        |     |      |      |       |       |      |    |    |        |        |   |   |
|    |     | 3  | 1  |     |     |            | Phe  | o  | 4  | 5 | 4 | 5 |       |       |    |    |    |       |       | 1   |    |     |        |        |     |      |      |       |       |      |    |    |        |        |   |   |
| kz |     | 6  | 7  |     |     | 1-O-       | noli | D  | 0  | 5 | 5 | 5 |       | 16    | 14 | 17 | 14 | 0.042 |       |     |    |     |        |        |     |      |      |       |       |      |    |    |        |        |   |   |
| 00 | [M  | 9. | 7. | 36  | C17 | Feruloyl   | c    | e  |    | 8 | 7 | 5 | 4     | 0.008 | 60 | 70 | 00 | 90    | 7±0.0 |     |    |     |        |        |     |      |      |       |       |      |    |    |        |        |   |   |
| 00 | +H] | 1  | 1  | 8.1 | H20 | quinic     | acid | e  |    | 0 | 0 | 0 | 0     | 1±0.0 | 00 | 00 | 00 | 00    | 296   |     |    |     |        |        |     |      |      |       |       |      |    |    |        |        |   |   |
| 64 | +   | 0  | 0  | 1   | O9  | acid       | s    | p  | -  | 0 | 0 | 0 | 0     | 121   |    |    |    |       |       | -   | -  | -   | -      | -      |     |      |      |       |       | 4560 | 50 | 00 | 60     | ±0.013 |   |   |
|    |     |    |    |     |     |            |      | Bi |    |   |   |   |       |       |    |    |    |       |       |     |    |     |        |        |     |      |      |       |       |      |    |    |        |        |   |   |
|    |     | 3  | 1  |     |     |            | Phe  | o  | 5  | 5 | 4 | 4 |       |       |    |    |    |       |       | 3   |    |     |        |        |     |      |      |       |       |      |    |    |        |        |   |   |
| kz |     | 7  | 3  |     |     |            | noli | D  | 0  | 1 | 6 | 3 |       | 42    | 71 | 00 | 96 | 0.002 | 118   | 4   | 12 | 120 | 0.0303 | 261    | 414 | 4300 | 241  | 0.005 |       |      |    |    |        |        |   |   |
| 00 | [M  | 5. | 7. | 37  | C19 | Feruloyl   | c    | e  |    | 6 | 8 | 9 | 2     | 0.008 | 00 | 00 | 0  | 40    | 2±0.0 | 000 | 0  | 60  | 000    | ±0.021 | 00  | 00   | 0    | 00    | 1±0.0 |      | 31 | 24 | 19     | 0.0051 |   |   |
| 00 | +H] | 2  | 1  | 4.1 | H18 | syringic   | acid | e  |    | 0 | 0 | 0 | 0     | ±0.00 |    |    |    |       | 079   |     |    |     |        |        |     |      |      |       |       | 2260 | 10 | 40 | 60     | ±0.009 |   |   |
| 66 | +   | 0  | 0  | 0   | O8  | acid       | s    | p  | -  | 0 | 0 | 0 | 0     | 9     |    |    |    |       |       | 0   |    |     |        |        |     |      |      |       |       | 0    | 0  | 0  | 0      | 7      | - | - |



[illegible]

|    |     |  |    |    |     |     |            |      |    |    |    |   |   |   |       |    |    |    |    |       |       |    |    |     |        |       |     |      |      |        |        |     |       |       |       |     |       |   |  |  |  |  |
|----|-----|--|----|----|-----|-----|------------|------|----|----|----|---|---|---|-------|----|----|----|----|-------|-------|----|----|-----|--------|-------|-----|------|------|--------|--------|-----|-------|-------|-------|-----|-------|---|--|--|--|--|
|    |     |  |    |    |     |     |            |      |    | p  | 0  | 0 | 0 | 0 |       |    |    |    |    |       |       |    |    |     | 0      |       |     |      |      |        |        |     |       |       |       |     |       |   |  |  |  |  |
|    |     |  |    |    |     |     |            |      |    | Bi |    |   |   |   |       |    |    |    |    |       | o     | 51 |    |     |        |       |     |      |      |        |        |     |       |       |       |     |       |   |  |  |  |  |
|    |     |  |    |    |     |     |            |      |    | D  | 85 | 3 | 3 | 3 | 2     |    |    |    |    |       |       |    |    |     |        | 49    | 45  | 49   | 51   | 0.013  |        |     |       |       |       |     |       |   |  |  |  |  |
| kz |     |  | 3  | 1  |     |     |            |      |    |    |    |   |   |   |       |    |    |    |    |       |       |    |    |     |        |       | 583 | 479  |      |        |        |     |       |       | 0.000 |     |       |   |  |  |  |  |
| 00 | [M  |  | 0  | 6  |     |     |            |      |    |    |    |   |   |   |       |    | 80 | 00 | 60 | 40    | 2±0.0 |    |    |     |        |       |     |      |      |        |        | 0   | 0     | 0     | 0     | 056 |       |   |  |  |  |  |
| 01 | +H] |  | 0  | 0  | 2.0 | C16 | 7-O-       | Flav | e  | 7- | 0  | 4 | 3 | 4 | 0.000 |    |    |    |    |       |       |    |    |     |        | 0     | 0   | 0    | 0    | 056    |        |     |       |       |       |     |       |   |  |  |  |  |
| 56 | +   |  | 8  | 0  | 8   | O6  | odictyol   | ds   | p  | -5 | 0  | 0 | 0 | 0 | 009   |    |    |    |    |       |       |    |    |     |        |       |     |      |      |        |        |     |       |       |       |     |       |   |  |  |  |  |
|    |     |  |    |    |     |     |            |      |    | Bi |    | 6 | 6 | 6 | 7     |    |    |    |    |       |       |    |    |     |        |       |     |      |      |        |        |     |       |       |       |     |       |   |  |  |  |  |
|    |     |  |    |    |     |     |            |      |    | o  |    | 3 | 3 | 2 | 1     |    |    |    |    |       |       |    |    |     |        | 13    | 14  | 14   | 14   | 0.385  |        |     |       |       |       |     |       |   |  |  |  |  |
| kz |     |  | 4  | 2  |     |     |            |      |    |    |    |   |   |   |       |    | 50 | 70 | 30 | 50    | 6±0.1 |    |    |     |        |       |     | 278  | 268  |        |        |     |       |       |       |     |       |   |  |  |  |  |
| 00 | [M  |  | 3. | 7  |     |     | Naringeni  | Flav | e  | 9- | 0  | 0 | 0 | 0 | 0.107 | 00 | 00 | 00 | 00 | 649   | 775   | 3  | 73 | 822 | 0.1845 | 278   | 268 |      |      |        |        |     |       | 0.413 |       |     |       |   |  |  |  |  |
| 01 | -   |  | 1  | 0  | 4.1 | H22 | glucoside  | onoi | e  | 55 | 0  | 0 | 0 | 0 | 4±0.0 | 0  | 0  | 0  | 0  |       | 000   | 0  | 70 | 000 | ±0.105 | 000   | 000 |      |      |        |        |     |       | 4±0.1 |       |     |       |   |  |  |  |  |
| 59 | H]- |  | 2  | 0  | 2   | O10 | (Prunin)   | ds   | p  | -5 | 0  | 0 | 0 | 0 | 944   |    |    |    |    |       |       |    |    |     |        |       |     |      |      |        |        |     |       |       |       |     |       |   |  |  |  |  |
|    |     |  |    |    |     |     |            |      |    | Bi |    |   |   |   |       |    |    |    |    |       |       |    |    |     |        |       |     |      |      |        |        |     |       |       |       |     |       |   |  |  |  |  |
|    |     |  |    |    |     |     |            |      |    | o  |    |   |   |   |       |    |    |    |    |       |       |    |    |     |        |       |     |      |      |        |        |     |       |       |       |     |       |   |  |  |  |  |
| kz |     |  | 9  | 6  |     |     |            |      |    |    |    |   |   |   |       |    | D  | 10 |    |       |       |    |    |     |        |       |     |      | 384  | 376    | 3400   | 419 | 0.005 |       |       |     |       |   |  |  |  |  |
| 00 | [M  |  | 6. | 8. |     | C5H | 3-         |      | e  | 9- |    |   |   |   |       |    |    |    |    |       |       |    |    |     |        |       | 00  | 00   | 0    | 00     | 7±0.0  |     |       |       |       |     |       |   |  |  |  |  |
| 01 | +H] |  | 0  | 0  | 95. | 5N  | Hydroxyp   | Oth  | e  | 00 |    |   |   |   |       |    |    |    |    |       |       |    |    |     |        |       |     |      |      |        |        |     | 034   |       |       |     |       |   |  |  |  |  |
| 73 | +   |  | 4  | 5  | 04  | O   | yridine    | ers  | p  | -2 | -  | - | - | - | -     | -  | -  | -  | -  | -     | -     | -  | -  | -   | -      | -     |     |      |      |        |        |     | -     | -     | -     | -   | -     | - |  |  |  |  |
|    |     |  |    |    |     |     |            |      |    |    | 8  | 6 | 6 | 7 |       |    |    |    |    |       |       |    |    |     |        |       |     |      |      |        |        |     |       |       |       |     |       |   |  |  |  |  |
|    |     |  |    |    |     |     |            |      |    | Bi |    | 6 | 5 | 7 | 0     |    |    |    |    |       |       | 61 | 70 | 63  | 55     | 1.696 | 458 | 4    | 44   | 338    | 1.0047 | 480 | 354   | 0.637 |       |     |       |   |  |  |  |  |
| kz |     |  | 1  |    |     |     |            |      |    |    |    |   |   |   |       |    | D  | 10 | 0  | 0     | 0     | 0  |    |     |        |       |     |      | 30   | 40     | 10     | 70  | 2±1.8 |       |       |     |       |   |  |  |  |  |
| 00 | [M  |  | 0. | 9. | 13  | C6H | 4-         |      | e  | 0- | 0  | 0 | 0 | 0 | 1.201 | 00 | 00 | 00 | 00 | 949   | 0     | 0  | 0  | 0   | 5      | 000   | 0   | 30   | 000  | ±1.289 | 480    | 354 | 4±0.9 |       |       |     |       |   |  |  |  |  |
| 01 | +H] |  | 0  | 0  | 9.0 | 5N  | Nitrophen  | Oth  | e  | 02 | 0  | 0 | 0 | 0 | 8±2.5 | 0  | 0  | 0  | 0  |       | 0     | 0  | 0  | 0   | 5      | 0     | 0   | 0    | 0    | 0      | 0      | 0   | 601   |       |       |     |       |   |  |  |  |  |
| 79 | +   |  | 0  | 0  | 3   | O3  | ol         | ers  | p  | -7 | 0  | 0 | 0 | 0 | 905   |    |    |    |    |       |       |    |    |     |        |       |     |      |      |        |        |     |       | 5350  |       |     |       |   |  |  |  |  |
|    |     |  |    |    |     |     |            |      |    |    | 1  | 1 | 1 | 1 |       |    |    |    |    |       |       |    |    |     |        |       |     |      |      |        |        |     | 000   |       |       |     |       |   |  |  |  |  |
|    |     |  |    |    |     |     |            |      |    |    | 7  | 9 | 8 | 8 |       |    |    |    |    |       |       |    |    |     |        |       |     |      |      |        |        |     | 0     |       |       |     |       |   |  |  |  |  |
|    |     |  |    |    |     |     |            |      |    | Bi |    | 0 | 7 | 9 | 0     |    |    |    |    |       |       | 14 | 13 | 14  | 14     | 3.854 | 195 | 3    | 19   | 175    | 4.6018 | 169 | 154   | 2.453 |       |     |       |   |  |  |  |  |
|    |     |  |    |    |     |     |            |      |    | o  |    | 0 | 0 | 0 | 0     |    |    |    |    |       |       | 30 | 50 | 30  | 90     | ±1.01 | 000 | 0    | 40   | 000    | ±2.524 | 169 | 154   | 2±0.8 |       |     |       |   |  |  |  |  |
| kz |     |  | 1  | 1  |     |     |            |      |    |    |    |   |   |   |       |    | D  | 50 | 0  | 0     | 0     | 0  |    |     |        |       |     |      | 00   | 00     | 00     | 00  | 78    | 000   | 0     | 00  | 0.003 |   |  |  |  |  |
| 00 | [M  |  | 2. | 4. | 14  | C6H |            |      | e  | 1- | 0  | 0 | 0 | 0 | 3.036 | 00 | 00 | 00 | 00 |       | 00    | 00 | 00 | 00  | 5      | 000   | 0   | 00   | 000  | 000    | 000    | 000 | 117   |       |       |     |       |   |  |  |  |  |
| 01 | +H] |  | 1  | 0  | 1.0 | 11N |            | Oth  | e  | 28 | 0  | 0 | 0 | 0 | ±1.19 |    |    |    |    |       |       |    |    |     |        |       |     |      |      |        |        |     |       | 1820  |       |     |       |   |  |  |  |  |
| 80 | +   |  | 0  | 9  | 9   | 3O  | Histidinol | ers  | p  | -0 | 0  | 0 | 0 | 0 | 7     |    |    |    |    |       |       |    |    |     |        |       |     |      |      |        |        |     |       | 0000  |       |     |       |   |  |  |  |  |
|    |     |  |    |    |     |     |            |      |    | Bi |    |   |   |   |       |    |    |    |    |       |       |    |    |     |        |       |     |      |      |        |        |     |       |       |       |     |       |   |  |  |  |  |
|    |     |  |    |    |     |     |            |      |    | o  |    | 1 | 1 | 2 | 1     |    |    |    |    |       |       |    |    |     |        |       |     |      |      |        |        |     |       |       |       |     |       |   |  |  |  |  |
| kz |     |  | 1  | 1  |     |     |            |      |    |    |    |   |   |   |       |    | D  | 49 | 7  | 6     | 6     | 7  |    |     |        |       |     |      | 20   | 19     | 17     | 19  | 0.005 |       |       |     |       |   |  |  |  |  |
| 00 | [M  |  | 5. | 3. | 16  | C10 |            |      | e  | 9- | 0  | 0 | 7 | 9 | 0.003 | 80 | 90 | 60 | 60 | 3±0.0 | 188   | 4  | 18 | 175 | 0.0042 | 194   | 227 | 1590 | 213  | 0.003  |        |     |       |       |       |     |       |   |  |  |  |  |
| 01 | +H] |  | 1  | 0  | 4.0 | H12 |            | Oth  | e  | 44 | 0  | 0 | 0 | 0 | 2±0.0 | 0  | 0  | 0  | 0  | 041   | 00    | 6  | 70 | 00  | ±0.004 | 00    | 00  | 0    | 00   | ±0.00  |        |     |       |       |       |     |       |   |  |  |  |  |
| 83 | +   |  | 0  | 0  | 8   | O2  | Hinokitio  | ers  | p  | -5 | 0  | 0 | 0 | 0 | 103   |    |    |    |    |       |       |    |    |     |        |       |     |      |      |        |        |     |       | 1960  |       |     |       |   |  |  |  |  |
| kz | [M  |  | 2  | 9  | 21  | C5H | 2-         | Oth  | Bi | 17 | 4  | 4 | 4 | 5 | 0.007 | 76 | 65 | 68 | 69 | 0.018 |       |    |    |     |        |       | 118 | 121  | 1280 | 141    | 0.019  |     |       |       |       |     |       |   |  |  |  |  |
| 00 | -   |  | 1  | 7. | 4.0 | 11O | Deoxyribo  | ers  | o  | 21 | 0  | 6 | 0 | 0 | 3±0.0 | 10 | 00 | 60 | 90 | 9±0.0 | -     | -  | -  | -   | -      | 000   | 000 | 00   | 000  | 1±0.0  | -      | -   | -     | -     | -     | 06  |       |   |  |  |  |  |

[illegible]

|    |     |    |    |     |     |             |      |    |    |   |   |   |       |       |     |    |    |       |        |     |    |    |        |        |     |       |      |       |       |      |    |    |        |        |            |            |
|----|-----|----|----|-----|-----|-------------|------|----|----|---|---|---|-------|-------|-----|----|----|-------|--------|-----|----|----|--------|--------|-----|-------|------|-------|-------|------|----|----|--------|--------|------------|------------|
| 02 | +   | 2. | 0. | 6   | N5  | N-          | s    | D  | 1  | 6 | 0 | 2 | 108   | 00    | 00  | 00 | 00 | 186   | 7      | 00  | 5  |    |        |        |     | 765   | 0    | 0     | 0     | 9    |    |    |        |        |            |            |
| 40 |     | 2  | 2  |     | O6  | Glucoside   |      | e  | 0  | 0 | 0 | 0 |       |       |     |    |    |       | 0      |     |    |    |        |        |     |       |      |       |       |      |    |    |        |        |            |            |
|    |     | 0  | 0  |     |     |             |      | e  | 0  | 0 | 0 | 0 |       |       |     |    |    |       | 0      |     |    |    |        |        |     |       |      |       |       |      |    |    |        |        |            |            |
|    |     |    |    |     |     |             |      | p  | 0  | 0 | 0 | 0 |       |       |     |    |    |       | 0      |     |    |    |        |        |     |       |      |       |       |      |    |    |        |        |            |            |
|    |     |    |    |     |     |             |      | Bi | 6  | 6 | 6 | 7 |       |       |     |    |    |       | 7      |     |    |    |        |        |     |       |      |       |       |      |    |    |        |        |            |            |
|    |     | 2  | 1  |     |     |             |      | o  | 17 | 3 | 4 | 3 | 1     |       |     |    |    |       | 0      |     |    |    |        |        |     |       |      |       |       |      |    |    |        |        |            |            |
| kz |     | 5  | 2  |     | C11 | Nicotinate  |      | D  | 72 | 8 | 3 | 4 | 9     |       | 23  | 25 | 27 | 26    | 0.069  | 709 | 9  | 65 |        |        |     | 0.140 |      |       |       |      |    |    |        |        |            |            |
| 00 | [M  | 6. | 4. | 25  | H14 | D-          | Vita | e  | 0- | 0 | 0 | 0 | 0     | 0.108 | 30  | 00 | 90 | 30    | 3±0.0  | 000 | 0  | 90 | 670    | 0.167± | 983 | 904   | 8900 | 962   | 0.140 |      |    |    |        |        |            |            |
| 02 | +H] | 2  | 1  | 6.0 | NO  | ribonucle   | min  | e  | 18 | 0 | 0 | 0 | 0     | 8±0.0 | 00  | 00 | 00 | 00    | 472    |     | 0  | 00 | 000    | 0.0649 | 000 | 000   | 00   | 000   | 9±0.0 | 65   | 63 | 59 | 0.1309 | C0     |            |            |
| 58 | +   | 0  | 0  | 8   | 6+  | oside       | s    | p  | -2 | 0 | 0 | 0 | 0     | 9     |     |    |    |       |        |     | 0  |    |        |        |     |       |      |       | 499   | 6320 | 20 | 90 | 70     | ±0.038 | 58         | ko00760,ko |
|    |     |    |    |     |     |             |      | Bi |    |   |   |   |       |       |     |    |    |       |        |     |    |    |        |        |     |       |      |       |       |      |    |    | 41     | 01100  |            |            |
|    |     | 2  | 1  |     |     |             |      | o  | 2  | 2 | 2 | 2 |       |       |     |    |    |       |        | 1   |    |    |        |        |     |       |      |       |       |      |    |    |        |        |            |            |
| kz |     | 6  | 2  |     | C12 |             |      | D  | 1  | 7 | 1 | 4 |       |       | 16  | 19 | 17 | 16    | 0.004  | 121 | 0  | 85 | 115    | 0.0026 | 595 | 636   | 5110 | 698   | 0.009 |      |    |    |        |        | ko00730,ko |            |
| 00 | [M  | 5. | 2. | 26  | H17 |             | Vita | e  | 2  | 9 | 5 | 5 | 0.003 | 50    | 90  | 30 | 80 | 8±0.0 | 00     | 8   | 70 | 00 | ±0.003 | 00     | 00  | 0     | 00   | 2±0.0 |       | 44   | 52 | 48 | 0.0095 | C0     | 01100,ko02 |            |
| 02 | +H] | 1  | 1  | 5.1 | N4  |             | min  | e  | 0  | 0 | 0 | 0 | 9±0.0 | 0     | 0   | 0  | 0  | 049   |        | 0   |    |    | 5      |        |     |       |      | 098   | 3790  | 60   | 30 | 40 | ±0.011 | 03     | 010,ko0412 |            |
| 59 | +   | 0  | 0  | 1   | OS+ | Thiamine    | s    | p  | -  | 0 | 0 | 0 | 0     | 048   |     |    |    |       |        |     | 0  |    |        |        |     |       |      |       |       | 0    | 0  | 0  | 0      | 5      | 78         | 2          |
|    |     |    |    |     |     |             |      | Bi |    |   |   |   |       |       |     |    |    |       |        | 1   |    |    |        |        |     |       |      |       |       |      |    |    |        |        |            |            |
| kz |     | 3  | 1  |     |     |             |      | o  | 1  | 1 | 1 | 2 |       |       | 16  | 17 | 15 | 16    | 0.004  | 190 | 6  | 18 | 163    | 0.0043 | 159 | 186   | 1740 | 140   | 0.002 |      |    |    |        |        |            |            |
| 00 | [M  | 2. | 2. | 33  | H21 | Pyridoxin   | Vita | e  | 5  | 3 | 3 | 7 | 0.003 | 50    | 10  | 10 | 60 | 4±0.0 | 00     | 4   | 50 | 00 | ±0.003 | 00     | 00  | 0     | 00   | 5±0.0 |       | 11   | 13 | 12 | 0.0027 | C0     |            |            |
| 02 | +H] | 1  | 0  | 1.1 | NO  | e-5'-O-     | min  | e  | 0  | 0 | 0 | 0 | 3±0.0 | 0     | 0   | 0  | 0  | 028   |        | 0   | 0  | 00 | 1      |        |     |       |      | 036   | 1400  | 60   | 40 | 30 | ±0.002 | 39     |            |            |
| 63 | +   | 3  | 7  | 3   | 8   | glucoside   | s    | p  | -  | 0 | 0 | 0 | 0     | 021   |     |    |    |       |        |     | 0  |    |        |        |     |       |      |       |       | 0    | 0  | 0  | 0      | 3      | 96         | --         |
|    |     |    |    |     |     |             |      | Bi |    |   |   |   |       |       |     |    |    |       |        | 7   |    |    |        |        |     |       |      |       |       |      |    |    |        |        |            |            |
| kz |     | 3  | 2  |     |     |             |      | o  | 5  | 7 | 6 | 6 |       |       | 82  | 97 | 10 | 10    | 0.026  | 747 | 0  | 85 | 803    | 0.0189 | 350 | 352   | 3780 | 467   | 0.005 |      |    |    |        |        |            |            |
| 00 | [M  | 9. | 7. | 36  | C20 | N-          |      | D  | 8  | 7 | 3 | 5 |       |       | 50  | 50 | 90 | 60    | 7±0.0  | 00  | 9  | 80 | 00     | ±0.016 | 00  | 00    | 0    | 00    | 8±0.0 |      | 17 | 14 | 14     | 0.0317 |            |            |
| 02 | +H] | 1  | 1  | 8.0 | H16 | sinapoylh   | Cou  | e  | 6  | 6 | 7 | 9 | 0.010 | 0     | 0   | 00 | 00 | 302   |        | 0   | 0  | 00 | 2      |        |     |       |      | 067   | 1340  | 90   | 80 | 90 | ±0.038 |        |            |            |
| 74 | +   | 2  | 0  | 9   | O7  | marin       | ins  | p  | -  | 0 | 0 | 0 | 0     | 114   |     |    |    |       |        |     | 0  |    |        |        |     |       |      |       |       | 00   | 00 | 00 | 00     | 5      | -          | -          |
|    |     |    |    |     |     |             |      | Bi |    |   |   |   |       |       |     |    |    |       |        |     |    |    |        |        |     |       |      |       |       |      |    |    |        |        |            |            |
| kz |     | 1  | 1  |     |     |             |      | o  | 51 | 8 | 7 | 5 | 7     |       | 40  | 27 | 35 | 41    | 0.009  |     |    |    |        |        |     |       |      |       |       |      |    |    |        |        |            |            |
| 00 | [M  | 3. | 5. | 13  |     | 4-          | Alka | D  | 92 | 4 | 8 | 5 | 6     |       | 90  | 30 | 40 | 50    | 8±0.0  |     |    |    |        |        |     |       |      |       |       |      |    |    |        |        |            |            |
| 02 | +H] | 1  | 1  | 2.0 | C8H | Aminoind    | loid | e  | -  | 7 | 5 | 1 | 9     | 0.012 | 0   | 0  | 0  | 0     | 168    |     |    |    |        |        |     |       |      |       |       |      |    |    |        |        |            |            |
| 76 | +   | 0  | 0  | 7   | 8N2 | ole         | s    | p  | -4 | 0 | 0 | 0 | 0     | 29    |     |    |    |       |        | -   | -  | -  | -      | -      | -   | -     | -    | -     | -     | -    | -  | -  | -      | -      | -          |            |
|    |     |    |    |     |     |             |      | Bi |    |   |   |   |       |       |     |    |    |       |        |     |    |    |        |        |     |       |      |       |       |      |    |    |        |        |            |            |
| kz |     | 1  | 1  |     |     |             |      | o  |    |   |   |   |       |       |     |    |    |       |        | 1   |    |    |        |        |     |       |      |       |       |      |    |    |        |        |            |            |
| 00 | [M  | 6. | 0. | 17  | H9  | Indole 3-   | Alka | D  | 87 |   |   |   |       |       | 143 | 0  | 11 | 150   | 0.0031 |     |    |    |        |        |     |       |      | 0.005 |       |      |    |    |        |        |            |            |
| 02 | +H] | 1  | 1  | 5.0 | NO  | acetic acid | loid | e  | 51 |   |   |   |       |       | 00  | 3  | 40 | 00    | ±0.005 |     |    |    |        |        |     |       |      | 3±0.0 |       | 12   | 14 | 10 | 0.0026 | C0     | ko00380,ko |            |
| 78 | +   | 0  | 0  | 6   | 2   | (IAA)       | s    | p  | -4 | - | - | - | -     | -     |     |    |    |       |        |     | 0  |    |        |        |     |       |      | 047   | 1230  | 70   | 40 | 90 | ±0.002 | 09     | 01100,ko04 |            |
| kz | [M  | 8  | 5  | 90. | C3H | 3-          | Org  | Bi | 50 | 1 | 1 | 1 | 1     | 0.021 | 90  | 97 | 92 | 99    | 0.025  | 107 | 1  | 10 | 104    | 0.0257 | 161 | 146   | 1600 | 163   | 0.023 | 3520 | 29 | 39 | 33     | 0.0071 | C0         | ko00240,ko |
| 00 | -   | 9. | 9. | 03  | 6O3 | Hydroxypr   | anic | o  | 3- | 3 | 3 | 2 | 1     | 4±0.0 | 70  | 40 | 20 | 50    | 7±0.0  | 000 | 0  | 50 | 000    | ±0.004 | 000 | 000   | 00   | 000   | 7±0.0 | 0    | 10 | 10 | 90     | ±0.007 | 10         | 00410,ko00 |

|    |     |    |    |     |     |             |      |    |    |   |   |   |   |       |    |    |    |    |       |     |   |    |     |        |   |     |     |      |     |       |      |    |    |           |        |            |            |    |
|----|-----|----|----|-----|-----|-------------|------|----|----|---|---|---|---|-------|----|----|----|----|-------|-----|---|----|-----|--------|---|-----|-----|------|-----|-------|------|----|----|-----------|--------|------------|------------|----|
| 02 | H]- | 0  | 0  |     |     | opanoic     | acid | D  | 66 | 9 | 6 | 3 | 9 | 252   | 0  | 0  | 0  | 0  | 122   |     | 6 | 00 |     | 3      |   |     |     | 1    |     | 0     | 0    | 0  | 8  |           | 13     | 640,ko0110 |            |    |
| 84 |     | 0  | 0  |     |     | acid        | s    | e  | -2 | 0 | 0 | 0 | 0 |       |    |    |    |    |       |     | 0 |    |     |        |   |     |     |      |     |       |      |    |    | 0,ko01200 |        |            |            |    |
|    |     |    |    |     |     |             |      | p  |    | 0 | 0 | 0 | 0 |       |    |    |    |    |       |     | 0 |    |     |        |   |     |     |      |     |       |      |    |    |           |        |            |            |    |
|    |     |    |    |     |     |             |      | Bi |    |   |   |   |   |       |    |    |    |    |       |     | 7 |    |     |        |   |     |     |      |     |       |      |    |    |           |        |            |            |    |
|    |     | 1  |    |     |     |             |      | o  | 15 | 5 | 6 | 6 | 6 |       |    |    |    |    |       |     |   |    |     |        |   |     |     |      |     |       |      |    |    |           |        |            |            |    |
| kz |     | 1  | 5  |     |     |             | Org  | D  | 66 | 5 | 1 | 6 | 1 |       | 43 | 62 | 49 | 56 | 0.014 |     | 5 | 72 |     | 0.0189 |   | 688 | 693 | 9580 | 553 | 0.010 |      |    |    |           |        |            |            |    |
| 00 | [M  | 7. | 9. | 11  |     | D-          | anic | e  | 7- | 7 | 1 | 0 | 7 | 0.010 | 80 | 70 | 60 | 30 | 4±0.0 | 750 | 0 | 10 | 896 | ±0.018 | 5 | 00  | 00  | 0    | 00  | 9±0.0 |      | 94 | 89 | 77        | 0.0176 |            |            |    |
| 02 | -   | 0  | 0  | 8.0 | C4H | Erythrono   | acid | e  | 21 | 0 | 0 | 0 | 0 | 1±0.0 | 0  | 0  | 0  | 0  | 235   | 00  | 0 | 0  | 00  | 5      |   | 00  | 00  | 0    | 00  | 282   | 7660 | 60 | 50 | 50        | ±0.015 |            |            |    |
| 89 | H]- | 0  | 0  | 3   | 6O4 | lactone     | s    | p  | -7 | 0 | 0 | 0 | 0 | 073   |    |    |    |    |       |     | 0 |    |     |        |   |     |     |      |     |       | 0    | 0  | 0  | 0         | 6      | -          | -          |    |
|    |     |    |    |     |     |             |      | Bi |    |   | 1 |   |   |       |    |    |    |    |       |     | 8 |    |     |        |   |     |     |      |     |       |      |    |    |           |        |            |            |    |
|    |     | 1  |    |     |     |             |      | o  | 10 | 8 | 0 | 8 | 7 |       | 53 | 61 | 58 | 62 | 0.015 |     | 6 | 88 |     | 0.0223 |   | 192 | 171 | 1770 | 200 | 0.027 |      |    |    |           |        |            |            |    |
| kz |     | 1  | 7  |     |     |             | Org  | D  | 68 | 0 | 3 | 3 | 9 |       | 20 | 60 | 30 | 30 | 9±0.0 | 990 | 8 | 40 | 922 | ±0.009 | 8 | 000 | 000 | 00   | 000 | 9±0.0 |      | 24 | 24 | 23        | 0.0498 | C0         |            |    |
| 00 | [M  | 8. | 4. | 11  | C3H |             | anic | e  | -  | 9 | 0 | 8 | 0 | 0.014 | 0  | 0  | 0  | 0  | 116   | 00  | 0 | 0  | 00  | 8      |   | 000 | 000 | 00   | 000 | 133   | 2260 | 60 | 80 | 90        | ±0.015 | 08         |            |    |
| 02 | -   | 0  | 0  | 9.0 | 5N  | Aminomal    | acid | e  | 84 | 0 | 0 | 0 | 0 | 3±0.0 |    |    |    |    |       |     | 0 |    |     |        |   |     |     |      |     |       |      |    |    |           |        |            |            |    |
| 90 | H]- | 0  | 0  | 2   | O4  | onic acid   | s    | p  | -4 | 0 | 0 | 0 | 0 | 176   |    |    |    |    |       |     |   |    |     |        |   |     |     |      |     |       | 00   | 00 | 00 | 00        | 1      | 72         | --         |    |
|    |     |    |    |     |     |             |      | Bi |    | 2 | 2 | 2 | 2 |       |    |    |    |    |       |     | 3 |    |     |        |   |     |     |      |     |       |      |    |    |           |        |            |            |    |
|    |     | 1  |    |     |     |             |      | o  |    | 3 | 1 | 4 | 1 |       |    |    |    |    |       |     | 8 |    |     |        |   |     |     |      |     |       |      |    |    |           |        |            |            |    |
| kz |     | 2  | 7  |     |     |             | Org  | D  | 98 | 8 | 7 | 5 | 9 |       | 14 | 14 | 14 | 15 | 0.040 |     | 6 | 38 |     | 0.0957 |   | 146 | 158 | 1420 | 159 | 0.022 |      |    |    |           |        |            |            |    |
| 00 | [M  | 2. | 8. | 12  | C6H |             | anic | e  | -  | 0 | 0 | 0 | 0 | 0.038 | 90 | 60 | 90 | 30 | 4±0.0 | 394 | 0 | 60 | 408 | ±0.020 | 6 | 000 | 000 | 00   | 000 | 8±0.0 |      | 12 | 11 | 10        | 0.0237 | C1         |            |    |
| 02 | -   | 0  | 0  | 3.0 | 5N  | 2-Picolinic | acid | e  | 98 | 0 | 0 | 0 | 0 | ±0.04 | 00 | 00 | 00 | 00 | 039   | 000 | 0 | 00 | 000 | 6      |   | 000 | 000 | 00   | 000 | 108   | 1130 | 10 | 60 | 70        | ±0.009 | 01         | ko00380,ko |    |
| 91 | H]- | 3  | 0  | 3   | O2  | acid        | s    | p  | -6 | 0 | 0 | 0 | 0 | 3     |    |    |    |    |       |     | 0 |    |     |        |   |     |     |      |     |       | 00   | 00 | 00 | 00        | 8      | 64         | 01100      |    |
|    |     |    |    |     |     |             |      | Bi |    | 4 | 4 | 4 | 4 |       |    |    |    |    |       |     | 3 |    |     |        |   |     |     |      |     |       |      |    |    |           |        |            |            |    |
|    |     | 1  |    |     |     |             |      | o  |    | 1 | 7 | 7 | 6 |       |    |    |    |    |       |     | 3 |    |     |        |   |     |     |      |     |       |      |    |    |           |        |            |            |    |
| kz |     | 3  | 8  |     |     |             | Org  | D  | 11 | 4 | 4 | 3 | 3 |       | 16 | 15 | 14 | 20 | 0.045 |     | 7 | 31 |     | 0.0744 |   | 343 | 333 | 3050 | 306 | 0.048 |      |    |    |           |        |            |            |    |
| 00 | [M  | 1. | 7. | 13  |     |             | anic | e  | 0- | 0 | 0 | 0 | 0 | 0.075 | 00 | 50 | 90 | 30 | 1±0.0 | 282 | 0 | 60 | 288 | ±0.073 | 2 | 000 | 000 | 00   | 000 | 5±0.0 |      | 25 |    |           |        |            |            |    |
| 02 | -   | 0  | 0  | 2.0 | C5H | Glutaric    | acid | e  | 94 | 0 | 0 | 0 | 0 | 2±0.0 | 00 | 00 | 00 | 00 | 626   | 000 | 0 | 00 | 000 | 2      |   | 000 | 000 | 00   | 000 | 352   | 2150 | 19 | 10 | 20        | 0.1583 | C0         | ko00071,ko |    |
| 93 | H]- | 4  | 0  | 4   | 8O4 | acid        | s    | p  | -1 | 0 | 0 | 0 | 0 | 325   |    |    |    |    |       |     | 0 |    |     |        |   |     |     |      |     |       | 00   | 00 | 0  | 00        | 3      | 89         | 100        |    |
|    |     |    |    |     |     |             |      | Bi |    |   |   |   |   |       |    |    |    |    |       |     | 1 |    |     |        |   |     |     |      |     |       |      |    |    |           |        |            |            |    |
|    |     | 1  |    |     |     |             |      | o  | 13 | 5 | 4 | 4 | 3 |       | 79 | 87 | 86 | 88 | 0.023 |     | 4 | 13 |     | 0.0036 |   | 732 | 674 | 7860 | 770 | 0.011 |      |    |    |           |        |            |            |    |
| kz |     | 3  | 8  |     |     | 2-          | Org  | D  | 74 | 0 | 8 | 5 | 6 |       | 80 | 70 | 50 | 60 | 2±0.0 | 161 | 5 | 30 | 155 | ±0.002 | 6 | 00  | 00  | 0    | 00  | 2±0.0 |      | 44 | 42 | 35        | 0.0087 |            |            |    |
| 00 | [M  | 1. | 5. | 13  | C6H | Hydroxyis   | anic | e  | 8- | 0 | 7 | 5 | 7 | 0.007 | 0  | 0  | 0  | 0  | 111   | 00  | 0 | 0  | 00  | 6      |   | 00  | 00  | 0    | 00  | 074   | 4440 | 80 | 60 | 70        | ±0.008 |            |            |    |
| 02 | -   | 0  | 0  | 2.0 | 12O | ocaproic    | acid | e  | 90 | 0 | 0 | 0 | 0 | 5±0.0 |    |    |    |    |       |     | 0 |    |     |        |   |     |     |      |     |       |      |    |    |           |        |            |            |    |
| 94 | H]- | 8  | 0  | 8   | 3   | acid        | s    | p  | -8 | 0 | 0 | 0 | 0 | 138   |    |    |    |    |       |     |   |    |     |        |   |     |     |      |     |       | 0    | 0  | 0  | 0         | 2      | -          | -          |    |
|    |     |    |    |     |     |             |      | Bi |    |   |   |   |   |       |    |    |    |    |       |     | 2 |    |     |        |   |     |     |      |     |       |      |    |    |           |        |            |            |    |
|    |     | 1  |    |     |     |             |      | o  | 23 | 5 | 4 | 5 | 5 |       | 80 | 75 | 80 | 89 | 0.022 |     | 3 | 23 |     | 0.0585 |   | 843 | 655 | 6690 | 767 | 0.011 |      |    |    |           |        |            |            |    |
| kz |     | 4  | 8  |     |     |             | Org  | D  | 06 | 0 | 2 | 3 | 7 |       | 70 | 80 | 30 | 00 | ±0.01 | 249 | 0 | 90 | 245 | ±0.011 | 9 | 000 | 000 | 0    | 00  | ±0.01 |      | 49 | 57 | 38        | 0.0094 | C0         |            |    |
| 00 | [M  | 7. | 7. | 14  |     |             | anic | e  | -  | 4 | 3 | 8 | 8 | 0.008 | 0  | 0  | 0  | 0  | 21    | 000 | 0 | 00 | 000 | 9      |   | 00  | 00  | 0    | 00  | 2     | 3600 | 60 | 20 | 70        | ±0.017 | 08         |            |    |
| 02 | -   | 0  | 1  | 8.0 | C5H | Citramalat  | acid | e  | 22 | 0 | 0 | 0 | 0 | 5±0.0 |    |    |    |    |       |     | 0 |    |     |        |   |     |     |      |     |       |      | 0  | 0  | 0         | 0      | 9          | 15         | -- |
| 96 | H]- | 0  | 0  | 4   | 8O5 | e           | s    | p  | -1 | 0 | 0 | 0 | 0 | 153   |    |    |    |    |       |     |   |    |     |        |   |     |     |      |     |       | 0    | 0  | 0  | 0         | 9      |            |            |    |
| kz | [M  | 1  | 7  | 17  | C3H | DL-         | Org  | Bi | 59 | 4 | 5 | 4 | 4 | 0.007 | 57 | 74 | 62 | 63 | 0.017 | 359 | 3 | 30 | 302 | 0.0079 |   | 842 | 825 | 1020 | 919 | 0.013 | 3960 | 31 | 35 | 32        | 0.0072 | C0         |            |    |
| 00 | -   | 6  | 9. | 0.0 | 7O6 | Glycerald   | anic | o  | 1- | 3 | 9 | 2 | 6 | 9±0.0 | 00 | 50 | 30 | 40 | 4±0.0 | 00  | 2 | 90 | 00  | ±0.005 |   | 00  | 00  | 00   | 00  | 6±0.0 | 0    | 50 | 40 | 10        | ±0.008 | 06         | --         |    |

|          |       |      |      |       |                   |                                    |         |        |        |       |               |               |       |       |        |               |               |        |        |              |               |        |        |        |               |               |        |        |        |             |               |                                         |                                                                          |
|----------|-------|------|------|-------|-------------------|------------------------------------|---------|--------|--------|-------|---------------|---------------|-------|-------|--------|---------------|---------------|--------|--------|--------------|---------------|--------|--------|--------|---------------|---------------|--------|--------|--------|-------------|---------------|-----------------------------------------|--------------------------------------------------------------------------|
| 0300     | H]-   | 9.00 | 00   | P     | ehyde 3-phosphate | acid                               | D       | 593610 | 134    | 0000  | 221           | 0000          | 70    | 6     |        | 146           | 0001          | 61     |        |              |               |        |        |        |               |               |        |        |        |             |               |                                         |                                                                          |
|          |       |      |      |       |                   |                                    | p       |        |        |       |               |               |       |       |        |               |               |        |        |              |               |        |        |        |               |               |        |        |        |             |               |                                         |                                                                          |
|          |       |      |      |       |                   |                                    | Bi      |        |        |       |               |               |       |       |        |               |               |        |        |              |               |        |        |        |               |               |        |        |        |             |               |                                         |                                                                          |
| kz000302 | [M-]  | 5.10 | 5.07 | 176.0 | C7H12O5           | 2-Isopropyl malate                 | Organic | D      | 4940   | 57900 | 0.0095±0.0219 | 76500         | 30800 | 41800 | 64400  | 0.0144±0.0557 | 37900         | 36600  | 39400  | 0.009±0.0038 | 455000        | 493000 | 604000 | 675000 | 0.0838±0.1388 | 189000        | 196000 | 174000 | 210000 | 0.04±0.0403 | C02504        | ko00290,ko00620,ko01100,ko01210,ko01230 |                                                                          |
|          |       |      |      |       |                   |                                    | Bi      |        |        |       |               |               |       |       |        |               |               |        |        |              |               |        |        |        |               |               |        |        |        |             |               |                                         |                                                                          |
| kz000304 | [M-]  | 9.10 | 9.01 | 210.1 | C12H18O3          | (±)-Jasmonic acid                  | Organic | D      | 77692  | 75000 | 87000         | 0.0132±0.054  | 61100 | 62700 | 61700  | 62600         | 0.1678±0.0376 | 99100  | 92000  | 96100        | 0.0025±0.0028 | 68500  | 60500  | 57900  | 72200         | 0.001±0.0008  | 119000 | 126000 | 124000 | 121000      | 0.0025±0.0006 | C08491                                  | ko00592,ko01100,ko04075                                                  |
|          |       |      |      |       |                   |                                    | Bi      |        |        |       |               |               |       |       |        |               |               |        |        |              |               |        |        |        |               |               |        |        |        |             |               |                                         |                                                                          |
| kz000306 | [M+H] | 5.10 | 1.10 | 4.14  | C13H20O3          | Methyl jasmonate                   | Organic | D      | 121129 | 45000 | 54000         | 0.0009±0.024  | 44900 | 45600 | 42400  | 42900         | 0.0119±0.006  | -      | -      | -            | -             | -      | -      | -      | -             | -             | -      | -      | -      | -           | -             | C11512                                  | ko00592,ko01110                                                          |
|          |       |      |      |       |                   |                                    | Bi      |        |        |       |               |               |       |       |        |               |               |        |        |              |               |        |        |        |               |               |        |        |        |             |               |                                         |                                                                          |
| kz000307 | [M-]  | 9.10 | 7.10 | 290.1 | C10H18N4O6        | Argininosuccinic acid              | Organic | D      | 23871  | 19300 | 88600         | 0.0048±0.0357 | 23000 | 19300 | 88600  | 19000         | 0.0048±0.0167 | 54800  | 19900  | 15100        | 0.0094±0.0604 | 260000 | 240000 | 112000 | 335000        | 0.0035±0.0131 | 148000 | 143000 | 165000 | 138000      | 0.0031±0.0017 | C03406                                  | ko00220,ko00250,ko01100,ko01230                                          |
|          |       |      |      |       |                   |                                    | Bi      |        |        |       |               |               |       |       |        |               |               |        |        |              |               |        |        |        |               |               |        |        |        |             |               |                                         |                                                                          |
| kz000308 | [M-]  | 2.40 | 9.73 | 32.2  | C18H29NO4         | N-[(L)-]-(L)-Isoleucine (JA-L-Ile) | Organic | D      | 30593  | 15000 | 54000         | 0.0026±0.015  | 34400 | 35000 | 35400  | 35500         | 0.0095±0.014  | 14000  | 12700  | 15300        | 0.0003±0.0002 | 219000 | 182000 | 216000 | 213000        | 0.0003±0.0003 | 219000 | 214000 | 220000 | 207000      | 0.0004±0.0001 | C18699                                  | ko04075                                                                  |
|          |       |      |      |       |                   |                                    | Bi      |        |        |       |               |               |       |       |        |               |               |        |        |              |               |        |        |        |               |               |        |        |        |             |               |                                         |                                                                          |
| kz000310 | [M-]  | 8.70 | 4.30 | 88.02 | C3H4O3            | Pyruvic acid                       | Organic | D      | 12717  | 000   | 000           | 0.0458±0.0433 | 79600 | 98700 | 100000 | 101000        | 0.0257±0.0271 | 115000 | 104000 | 91500        | 0.0246±0.0236 | 101000 | 772000 | 943000 | 103000        | 0.0141±0.0155 | 182000 | 175000 | 187000 | 202000      | 0.0388±0.0296 | C00022                                  | ko00010,ko00020,ko00030,ko00040,ko00053,ko00250,ko00260,ko00270,ko00290, |

[illegible]

[illegible]







































|    |     |    |    |     |     |            |     |    |    |   |   |   |    |       |    |    |    |     |       |     |    |     |        |        |     |      |      |       |       |      |    |        |        |        |            |            |
|----|-----|----|----|-----|-----|------------|-----|----|----|---|---|---|----|-------|----|----|----|-----|-------|-----|----|-----|--------|--------|-----|------|------|-------|-------|------|----|--------|--------|--------|------------|------------|
| 09 | H]- | 9. | 7. | 9   | O11 | glucoside  |     | D  | 7  | 7 | 8 | 3 | 46 | 00    | 00 | 00 | 00 | 817 | 6     | 00  | 8  | 0   | 0      | 0      | 03  | 00   | 00   | 00    | 8     |      |    |        |        |        |            |            |
| 97 |     | 1  | 1  |     |     |            |     | e  | 0  | 0 | 0 | 0 |    | 0     | 0  | 0  | 0  |     | 0     |     |    |     |        |        |     |      |      |       |       |      |    |        |        |        |            |            |
|    |     | 9  | 4  |     |     |            |     | e  | 0  | 0 | 0 | 0 |    |       |    |    |    |     | 0     |     |    |     |        |        |     |      |      |       |       |      |    |        |        |        |            |            |
|    |     |    |    |     |     |            |     | p  | 0  | 0 | 0 | 0 |    |       |    |    |    |     | 0     |     |    |     |        |        |     |      |      |       |       |      |    |        |        |        |            |            |
|    |     |    |    |     |     |            |     |    | 0  | 0 | 0 | 0 |    |       |    |    |    |     |       |     |    |     |        |        |     |      |      |       |       |      |    |        |        |        |            |            |
|    |     |    |    |     |     | 1-         |     | Bi |    |   |   |   |    |       |    |    |    |     | 1     |     |    |     |        |        |     |      |      |       |       |      |    |        |        |        |            |            |
|    |     | 1  |    |     |     | Aminocycl  |     | o  | 22 | 1 | 3 | 2 | 1  |       |    |    |    |     | 1     |     |    |     |        |        |     |      |      |       |       |      |    |        |        |        |            |            |
| kz |     | 0  | 5  |     |     | opropane-  |     | D  | 05 | 6 | 0 | 2 | 8  |       | 11 | 13 | 12 | 15  | 0.003 | 132 | 4  | 13  | 146    | 0.0034 | 120 | 125  | 1360 | 117   | 0.001 |      |    |        |        |        |            |            |
| 00 | [M  | 2. | 6. | 10  | C4H | 1-         |     | e  | 9- | 0 | 1 | 6 | 1  | 0.003 | 40 | 50 | 90 | 50  | 6±0.0 | 00  | 2  | 20  | 00     | ±0.001 | 00  | 00   | 0    | 00    | 9±0.0 | 20   | 28 | 20     | 0.0044 | C0     | ko00270,ko |            |
| 10 | +H] | 0  | 0  | 1.0 | 7N  | carboxylic | Oth | e  | 21 | 0 | 0 | 0 | 0  | 6±0.0 | 0  | 0  | 0  | 0   | 044   |     | 0  | 0   |        |        |     |      |      |       | 1480  | 80   | 00 | 90     | ±0.010 | 12     | 01100,ko01 |            |
| 08 | +   | 5  | 5  | 5   | O2  | acid       | ers | p  | -8 | 0 | 0 | 0 | 0  | 112   |    |    |    |     |       |     | 0  |     |        |        |     |      |      |       | 0     | 0    | 0  | 0      | 2      | 34     | 110        |            |
|    |     |    |    |     |     |            |     | Bi |    |   |   |   |    |       |    |    |    |     |       |     |    |     |        |        |     |      |      |       |       |      |    |        |        |        |            |            |
|    |     | 1  |    |     |     |            |     | o  | 64 |   |   |   |    |       |    |    |    |     | 1     |     |    |     |        |        |     |      |      |       |       |      |    |        |        |        |            |            |
| kz |     | 2  | 6  |     |     |            |     | D  | 81 |   |   |   |    |       |    |    |    |     | 142   | 2   | 71 | 106 | 0.0027 | 172    | 107 | 1210 | 142  | 0.002 |       |      |    |        |        |        |            |            |
| 00 | [M  | 6. | 8. | 12  | C6H | 1-         |     | e  | -  |   |   |   |    |       |    |    |    |     | 00    | 0   | 30 | 00  | ±0.007 | 00     | 00  | 0    | 00   | ±0.00 | 15    | 15   | 14 | 0.0314 |        |        |            |            |
| 10 | +H] | 1  | 0  | 5.1 | 11N | Methylhis  | Oth | e  | 48 |   |   |   |    |       |    |    |    |     |       | 0   |    |     |        |        |     |      |      | 41    | 1490  | 10   | 60 | 90     | ±0.002 | -      | -          |            |
| 14 | +   | 0  | 0  | 0   | 3   | tamine     | ers | p  | -7 | - | - | - | -  | -     | -  | -  | -  | -   |       |     | 0  |     |        |        |     |      |      |       | 00    | 00   | 00 | 00     | 2      | -      | -          |            |
|    |     |    |    |     |     |            |     | Bi |    |   |   |   |    |       |    |    |    |     |       |     |    |     |        |        |     |      |      |       |       |      |    |        |        |        |            |            |
|    |     | 1  |    |     |     | 3-Amino-   |     | o  | 36 | 1 |   | 1 | 1  |       |    |    |    |     | 1     |     |    |     |        |        |     |      |      |       |       |      |    |        |        |        |            |            |
| kz |     | 3  | 7  |     |     | 1-         |     | D  | 87 | 1 | 9 | 2 | 0  |       | 98 | 78 | 10 | 11  | 0.002 | 133 | 0  | 11  | 705    | 0.0025 | 443 | 455  | 4320 | 481   | 0.006 |      |    |        |        |        |            |            |
| 00 | [M  | 8. | 9. | 13  | C3H | propionic  |     | e  | -  | 6 | 2 | 3 | 5  | 0.001 | 80 | 30 | 50 | 60  | 7±0.0 | 00  | 2  | 00  | 0      | ±0.006 | 00  | 00   | 0    | 00    | 8±0.0 | 18   | 23 | 15     | 0.0039 |        |            |            |
| 10 | -   | 0  | 9  | 9.0 | 9N  | sulfonic   | Oth | e  | 18 | 0 | 2 | 0 | 0  | 8±0.0 |    |    | 0  | 0   | 039   |     | 0  | 0   | 1      |        |     |      |      | 017   | 1910  | 30   | 60 | 20     | ±0.006 | -      | -          |            |
| 18 | H]- | 2  | 6  | 3   | O3S | acid       | ers | p  | -1 | 0 | 0 | 0 | 0  | 034   |    |    |    |     |       |     | 0  |     |        |        |     |      |      |       | 0     | 0    | 0  | 0      | 2      | -      | -          |            |
|    |     |    |    |     |     |            |     | Bi |    |   |   |   |    |       |    |    |    |     |       |     |    |     |        |        |     |      |      |       |       |      |    |        |        |        |            |            |
|    |     | 1  | 1  |     |     |            |     | o  |    | 4 | 5 | 5 | 5  |       |    |    |    |     |       | 1   |    |     |        |        |     |      |      |       |       |      |    |        |        |        |            |            |
| kz |     | 4  | 1  |     |     | 4-Methyl-  |     | D  | 13 | 5 | 2 | 6 | 3  |       | 41 | 43 | 46 | 44  | 0.118 | 151 | 1  | 14  | 153    | 0.3647 | 202 | 205  | 1850 | 208   | 0.030 |      |    |        |        |        |            |            |
| 00 | [M  | 4. | 3. | 14  | C6H | 5-         |     | e  | 7- | 0 | 0 | 0 | 0  | 0.084 | 90 | 30 | 10 | 00  | 6±0.0 | 000 | 0  | 50  | 000    | ±0.081 | 000 | 000  | 00   | 000   | 1±0.0 | 75   | 73 | 66     | 0.0148 | C0     |            |            |
| 10 | +H] | 0  | 2  | 3.0 | 9N  | thiazoleet | Oth | e  | 00 | 0 | 0 | 0 | 0  | ±0.03 | 00 | 0  | 0  | 0   | 408   |     | 0  | 0   | 0      | 9      |     |      |      |       | 121   | 7010 | 40 | 10     | 80     | ±0.005 | 42         | ko00730,ko |
| 20 | +   | 5  | 0  | 4   | OS  | hanol      | ers | p  | -8 | 0 | 0 | 0 | 0  | 59    |    |    |    |     | 59    |     | 0  |     |        |        |     |      |      |       | 0     | 0    | 0  | 0      | 8      | 94     | 01100      |            |
|    |     |    |    |     |     |            |     | Bi |    |   |   |   |    |       |    |    |    |     |       |     |    |     |        |        |     |      |      |       |       |      |    |        |        |        |            |            |
|    |     | 1  |    |     |     |            |     | o  | 32 | 5 | 7 | 7 | 6  |       |    |    |    |     |       | 2   |    |     |        |        |     |      |      |       |       |      |    |        |        |        |            |            |
| kz |     | 7  | 8  |     |     | D-         |     | D  | 44 | 2 | 3 | 3 | 7  |       | 63 | 48 | 61 | 59  | 0.015 | 190 | 3  | 24  | 250    | 0.0056 | 533 | 539  | 5350 | 544   | 0.081 |      |    |        |        |        |            |            |
| 00 | [M  | 5. | 5. | 17  |     | Glucurono  |     | e  | 9- | 8 | 7 | 0 | 4  | 0.011 | 10 | 20 | 90 | 70  | 7±0.0 | 00  | 0  | 90  | 00     | ±0.007 | 000 | 000  | 00   | 000   | 1±0.0 | 41   | 42 | 40     | 0.0854 | C0     |            |            |
| 10 | -   | 0  | 0  | 6.0 | C6H | -6,3-      | Oth | e  | 92 | 0 | 0 | 0 | 0  | ±0.01 | 0  | 0  | 0  | 0   | 168   |     | 0  | 0   |        | 3      |     |      |      |       | 19    | 4030 | 30 | 30     | 40     | ±0.005 | 26         | ko00053,ko |
| 25 | H]- | 2  | 3  | 3   | 8O6 | lactone    | ers | p  | -6 | 0 | 0 | 0 | 0  | 6     |    |    |    |     | 6     |     | 0  |     |        |        |     |      |      |       |       | 00   | 00 | 00     | 00     | 2      | 70         | 01100      |
|    |     |    |    |     |     |            |     | Bi |    | 1 | 1 | 1 | 1  |       |    |    |    |     |       |     |    |     |        |        |     |      |      |       |       |      |    |        |        |        |            |            |
|    |     | 2  |    |     |     |            |     | o  | 18 | 5 | 4 | 4 | 3  |       |    |    |    |     |       | 5   |    |     |        |        |     |      |      |       |       |      |    |        |        |        |            |            |
| kz |     | 2  | 8  |     |     | N-Acetyl-  |     | D  | 11 | 0 | 8 | 0 | 2  |       | 75 | 84 | 77 | 72  | 0.021 | 579 | 8  | 41  | 637    | 0.0134 | 200 | 170  | 1900 | 207   | 0.028 |      |    |        |        |        |            |            |
| 00 | [M  | 2. | 4. | 22  | C8H | D-         |     | e  | -  | 0 | 0 | 0 | 0  | 0.023 | 00 | 80 | 40 | 70  | ±0.01 | 00  | 0  | 30  | 00     | ±0.022 | 000 | 000  | 00   | 000   | 9±0.0 | 16   | 15 | 13     |        |        |            |            |
| 10 | +H] | 1  | 0  | 1.0 | 15N | galactosa  | Oth | e  | 31 | 0 | 0 | 0 | 0  | 6±0.0 | 0  | 0  | 0  | 0   | 74    |     | 0  | 0   |        | 9      |     |      |      |       | 19    | 1730 | 20 | 50     | 80     | 0.0326 | -          | -          |
| 32 | +   | 0  | 5  | 9   | O6  | mine       | ers | p  | -0 | 0 | 0 | 0 | 0  | 229   |    |    |    |     | 229   |     | 0  |     |        |        |     |      |      |       |       | 00   | 00 | 00     | 00     | ±0.031 | -          | -          |











|    |     |    |    |     |     |            |      |    |    |   |   |   |   |       |    |    |    |    |       |     |   |    |     |        |     |     |      |       |       |      |    |    |    |        |            |                 |            |
|----|-----|----|----|-----|-----|------------|------|----|----|---|---|---|---|-------|----|----|----|----|-------|-----|---|----|-----|--------|-----|-----|------|-------|-------|------|----|----|----|--------|------------|-----------------|------------|
| 11 | +   | 8. | 0  | 6   |     |            | s    | D  | 72 | 3 | 8 | 2 | 9 | 038   | 0  | 0  | 0  | 0  | 021   |     | 3 | 0  |     | 3      |     |     |      |       | 33    |      | 0  | 0  | 0  | 7      |            | 63              | 402,ko0110 |
| 98 |     | 0  | 0  |     |     |            |      | e  | -9 | 0 | 0 | 0 | 0 |       |    |    |    |    |       |     | 0 |    |     |        |     |     |      |       |       |      |    |    |    |        | 0,ko01110  |                 |            |
|    |     | 7  |    |     |     |            |      | e  |    | 0 | 0 | 0 | 0 |       |    |    |    |    |       |     | 0 |    |     |        |     |     |      |       |       |      |    |    |    |        |            |                 |            |
|    |     |    |    |     |     |            |      | p  |    |   |   |   |   |       |    |    |    |    |       |     |   |    |     |        |     |     |      |       |       |      |    |    |    |        |            |                 |            |
|    |     |    |    |     |     |            |      | Bi |    |   |   |   |   |       |    |    |    |    |       |     |   |    |     |        |     |     |      |       |       |      |    |    |    |        |            |                 |            |
|    |     | 1  |    |     |     |            |      | o  |    | 2 | 3 | 3 | 2 |       |    |    |    |    |       |     | 7 |    |     |        |     |     |      |       |       |      |    |    |    |        |            |                 |            |
| kz |     | 4  | 9  |     |     |            |      | D  | 48 | 9 | 7 | 7 | 9 |       | 24 | 31 | 19 | 33 | 0.007 |     | 0 | 73 |     |        |     |     |      |       | 0.077 |      |    |    |    |        |            |                 |            |
| 00 | [M  | 6. | 1. | 14  | C9H | Indole-3-  | Alka | e  | 7- | 6 | 8 | 9 | 9 | 0.005 | 20 | 90 | 70 | 30 | 4±0.0 | 696 | 8 | 90 | 760 | 0.0176 | 529 | 492 | 4960 | 537   | 4±0.0 |      | 54 | 46 | 49 | 0.1043 | C0         |                 |            |
| 11 | +H] | 0  | 0  | 5.0 | 7N  | carboxald  | loid | e  | 89 | 0 | 0 | 0 | 0 | 6±0.0 | 0  | 0  | 0  | 0  | 177   | 00  | 0 | 0  | 00  | ±0.007 | 000 | 000 | 00   | 000   | 185   | 4990 | 10 | 90 | 60 | ±0.074 | 84         |                 |            |
| 99 | +   | 6  | 0  | 5   | O   | ehyde      | s    | p  | -8 | 0 | 0 | 0 | 0 | 081   |    |    |    |    |       |     | 0 |    |     |        |     |     |      |       |       | 00   | 00 | 00 | 00 | 5      | 93         | --              |            |
|    |     |    |    |     |     |            |      | Bi |    |   |   |   |   |       |    |    |    |    |       |     |   |    |     |        |     |     |      |       |       |      |    |    |    |        |            |                 |            |
|    |     | 1  | 1  |     |     |            |      | o  |    | 2 | 3 | 3 | 3 |       |    |    |    |    |       |     | 3 |    |     |        |     |     |      |       |       |      |    |    |    |        |            |                 |            |
| kz |     | 6  | 1  |     |     |            |      | D  | 77 | 9 | 2 | 2 | 6 |       | 27 | 33 | 32 | 29 | 0.008 |     | 4 | 43 |     |        |     |     |      | 0.068 |       |      |    |    |    |        |            |                 |            |
| 00 | [M  | 0. | 6. | 16  | C9H | Indole-3-  | Alka | e  | 1- | 2 | 1 | 6 | 2 | 0.005 | 90 | 90 | 10 | 30 | 3±0.0 | 329 | 5 | 00 | 376 | 0.009± | 446 | 433 | 4680 | 482   | 9±0.0 |      | 57 | 59 | 55 | 0.1182 |            |                 |            |
| 12 | -   | 0  | 0  | 1.0 | 7N  | carboxylic | loid | e  | 50 | 0 | 0 | 0 | 0 | 4±0.0 | 0  | 0  | 0  | 0  | 082   | 00  | 0 | 0  | 00  | 0.0114 | 000 | 000 | 00   | 000   | 261   | 5460 | 20 | 90 | 90 | ±0.020 |            |                 |            |
| 03 | H]- | 4  | 0  | 5   | O2  | acid       | s    | p  | -6 | 0 | 0 | 0 | 0 | 051   |    |    |    |    |       |     | 0 |    |     |        |     |     |      |       |       | 00   | 00 | 00 | 00 | 9      | -          | -               |            |
|    |     |    |    |     |     |            |      | Bi |    |   |   |   |   |       |    |    |    |    |       |     |   |    |     |        |     |     |      |       |       |      |    |    |    |        |            |                 |            |
|    |     | 1  |    |     |     |            |      | o  | 19 |   | 1 | 1 | 1 |       |    |    |    |    |       |     | 7 |    |     |        |     |     |      |       |       |      |    |    |    |        |            |                 |            |
| kz |     | 0  | 6  |     |     |            | Org  | D  | 56 | 9 | 3 | 2 | 1 |       | 67 | 65 | 65 | 59 | 0.017 |     | 7 | 95 | 948 | 0.0023 | 157 | 147 | 1340 | 172   | 0.002 |      |    |    |    |        | ko00250,ko |                 |            |
| 00 | [M  | 4. | 8. | 10  | C4H | γ-         | anic | e  | /1 | 6 | 2 | 0 | 6 | 0.001 | 30 | 00 | 60 | 20 | 4±0.0 | 104 | 5 | 70 | 0   | ±0.002 | 00  | 00  | 0    | 00    | 3±0.0 |      | 11 | 16 |    | 0.0024 | C0         |                 |            |
| 12 | +H] | 0  | 8  | 3.0 | 9N  | Aminobut   | acid | e  | 2/ | 8 | 0 | 0 | 0 | 9±0.0 | 0  | 0  | 0  | 0  | 11    | 00  | 0 |    |     | 4      | 00  | 00  | 0    | 00    | 018   |      | 60 | 70 | 92 | ±0.006 | 03         |                 |            |
| 61 | +   | 7  | 0  | 6   | O2  | rylic acid | s    | p  | 2  | 0 | 0 | 0 | 0 | 021   |    |    |    |    |       |     | 0 |    |     |        |     |     |      |       |       | 9050 | 0  | 0  | 10 | 7      | 34         | ko00760,ko01100 |            |
|    |     |    |    |     |     |            |      |    |    |   |   |   |   |       |    |    |    |    |       |     |   |    |     |        |     |     |      |       |       |      |    |    |    |        |            |                 |            |
|    |     |    |    |     |     |            |      |    |    | 7 | 7 | 8 | 7 |       |    |    |    |    |       |     | 1 |    |     |        |     |     |      |       |       |      |    |    |    |        |            |                 |            |
|    |     |    |    |     |     |            |      | Bi |    | 1 | 4 | 3 | 4 |       | 10 | 74 | 95 | 92 |       |     | 1 |    |     |        |     |     |      |       |       |      |    |    |    |        |            |                 |            |
|    |     | 1  |    |     |     |            | Org  | o  |    | 1 | 1 | 7 | 3 |       | 70 | 80 | 20 | 50 | 2.496 |     | 0 | 10 |     |        |     |     |      |       |       |      |    |    |    |        |            |                 |            |
| kz |     | 0  | 5  |     |     |            |      | D  | 30 | 0 | 0 | 0 | 0 |       | 00 | 00 | 00 | 00 | 9±3.4 | 101 | 0 | 00 | 110 | ±1.459 | 000 | 000 | 9260 | 107   | 1.503 |      | 75 | 92 | 74 |        |            |                 |            |
| 00 | [M  | 3. | 9. | 10  |     | 3-         | anic | e  | 0- | 0 | 0 | 0 | 0 | 1.252 | 00 | 0  | 0  | 0  | 274   | 00  | 0 | 00 | 00  | 6      | 00  | 0   | 00   | 00    | 8±1.4 |      | 00 | 40 | 30 | 1.6236 |            |                 |            |
| 12 | -   | 0  | 1  | 4.0 | C4H | Hydroxyb   | acid | e  | 85 | 0 | 0 | 0 | 0 | 2±1.1 |    |    |    |    |       |     | 0 |    |     |        |     |     |      |       |       | 7130 | 00 | 00 | 00 | ±1.565 |            |                 |            |
| 64 | H]- | 4  | 0  | 5   | 8O3 | utyrate    | s    | p  | -6 | 0 | 0 | 0 | 0 | 462   |    |    |    |    |       |     | 0 |    |     |        |     |     |      |       |       | 000  | 0  | 0  | 0  | 9      | -          | -               |            |
|    |     |    |    |     |     |            |      |    |    | 1 | 1 | 1 | 1 |       |    |    |    |    |       |     |   |    |     |        |     |     |      |       |       |      |    |    |    |        |            |                 |            |
|    |     |    |    |     |     |            |      | Bi |    | 1 | 2 | 1 | 0 |       |    |    |    |    |       |     | 3 |    |     |        |     |     |      |       |       |      |    |    |    |        |            |                 |            |
|    |     | 1  |    |     |     |            |      | o  |    | 3 | 1 | 3 | 5 |       | 96 | 95 | 10 | 93 | 0.262 |     | 3 |    |     |        |     |     |      |       |       |      |    |    |    |        |            |                 |            |
| kz |     | 1  | 6  |     |     |            | Org  | D  | 88 | 0 | 0 | 0 | 0 |       | 80 | 20 | 00 | 40 | ±0.09 | 368 | 9 | 38 | 348 | 0.0873 | 100 | 984 | 9730 | 109   | 0.152 |      | 10 | 10 | 10 |        |            |                 |            |
| 00 | [M  | 1. | 7. | 11  |     | 2-         | anic | e  | -  | 0 | 0 | 0 | 0 | 0.186 | 00 | 00 | 00 | 00 | 78    | 000 | 0 | 20 | 000 | ±0.045 | 000 | 000 | 00   | 000   | 4±0.0 |      | 40 | 80 | 10 | 0.2138 | C0         |                 |            |
| 12 | -   | 0  | 0  | 2.0 | C5H | Furanoic   | acid | e  | 14 | 0 | 0 | 0 | 0 | 6±0.1 |    |    |    |    |       |     | 0 |    |     | 8      | 0   | 000 | 0    | 355   |       | 9860 | 00 | 00 | 00 | ±0.038 | 15         |                 |            |
| 68 | H]- | 1  | 0  | 2   | 4O3 | acid       | s    | p  | -2 | 0 | 0 | 0 | 0 | 294   |    |    |    |    |       |     | 0 |    |     |        |     |     |      |       |       | 00   | 0  | 0  | 0  | 1      | 46         | ko01100         |            |
|    |     |    |    |     |     |            |      | Bi |    | 2 | 2 | 2 | 2 |       |    |    |    |    |       |     |   |    |     |        |     |     |      |       |       |      |    |    |    |        |            |                 |            |
|    |     | 1  |    |     |     |            |      | o  | 51 | 4 | 7 | 6 | 5 |       | 16 | 16 | 16 | 16 | 0.444 |     | 2 |    |     |        |     |     |      |       |       |      |    |    |    |        |            |                 |            |
| kz |     | 1  | 7  |     |     |            | Org  | D  | 6- | 9 | 8 | 5 | 2 | 0.430 | 10 | 90 | 40 | 30 | 5±0.1 | 275 | 6 | 27 | 279 | 0.6606 | 533 | 528 | 5380 | 557   | 0.812 |      | 70 | 70 | 68 |        | ko00240,ko |                 |            |
| 00 | [M  | 7. | 3. | 11  |     |            | anic | e  | 05 | 0 | 0 | 0 | 0 | 9±0.1 | 00 | 00 | 00 | 00 | 523   | 000 | 0 | 30 | 000 | ±0.143 | 000 | 000 | 000  | 000   | 6±0.1 |      | 10 | 60 | 00 | 1.4247 | C0         |                 |            |
| 12 | -   | 0  | 0  | 8.0 | C4H | Methylma   | acid | e  | -2 | 0 | 0 | 0 | 0 | 498   | 0  | 0  | 0  | 0  |       |     | 0 |    | 0   | 9      | 0   | 0   | 5380 | 0     | 208   | 6550 | 00 | 00 | 00 | ±0.319 | 21         |                 |            |
| 75 | H]- | 2  | 0  | 3   | 6O4 | lonic acid | s    | e  | -2 | 0 | 0 | 0 | 0 |       |    |    |    |    |       |     | 0 |    |     |        |     |     |      |       |       | 000  | 0  | 0  | 0  | 9      | 70         | 0               |            |





|    |     |    |    |     |     |            |      |    |    |   |   |   |   |       |    |    |    |    |       |     |   |    |     |        |     |     |      |     |       |     |    |    |        |        |            |            |
|----|-----|----|----|-----|-----|------------|------|----|----|---|---|---|---|-------|----|----|----|----|-------|-----|---|----|-----|--------|-----|-----|------|-----|-------|-----|----|----|--------|--------|------------|------------|
| 12 | H]- | 1. | 2  | 1   |     |            | acid | D  | 42 |   |   |   |   |       | 0  | 0  | 0  | 0  | 267   |     | 2 | 0  |     | 2      |     |     |      | 049 |       | 0   | 0  | 0  | 2      |        | 36         | 250,ko0062 |
| 84 |     |    | 0  | 0   |     |            | s    | e  | -7 |   |   |   |   |       |    |    |    |    |       |     | 0 |    |     |        |     |     |      |     |       |     |    |    |        |        | 0,ko00630, |            |
|    |     |    | 0  |     |     |            |      | e  |    |   |   |   |   |       |    |    |    |    |       |     | 0 |    |     |        |     |     |      |     |       |     |    |    |        |        | ko00710,ko |            |
|    |     |    |    |     |     |            |      | p  |    |   |   |   |   |       |    |    |    |    |       |     |   |    |     |        |     |     |      |     |       |     |    |    |        |        | 01100,ko01 |            |
|    |     |    |    |     |     |            |      |    |    |   |   |   |   |       |    |    |    |    |       |     |   |    |     |        |     |     |      |     |       |     |    |    |        |        | 110,ko0120 |            |
|    |     |    |    |     |     |            |      |    |    |   |   |   |   |       |    |    |    |    |       |     |   |    |     |        |     |     |      |     |       |     |    |    |        |        | 0,ko01210, |            |
|    |     |    |    |     |     |            |      |    |    |   |   |   |   |       |    |    |    |    |       |     |   |    |     |        |     |     |      |     |       |     |    |    |        |        | ko01230    |            |
|    |     |    |    |     |     |            |      | Bi |    | 5 | 6 | 6 | 5 |       |    |    |    |    |       |     | 2 |    |     |        |     |     |      |     |       |     |    |    |        |        |            |            |
|    |     | 1  |    |     |     |            |      | o  |    | 4 | 4 | 1 | 8 |       |    |    |    |    |       |     | 7 |    |     |        |     |     |      |     |       |     |    |    |        |        |            |            |
| kz |     | 3  | 8  |     |     |            | Org  | D  | 49 | 2 | 5 | 3 | 9 |       | 20 | 19 | 17 | 15 | 0.048 | 302 | 2 | 25 | 253 | 0.0655 | 700 | 665 | 7060 | 722 | 0.105 |     |    |    |        |        |            |            |
| 00 | [M  | 1. | 7. | 13  |     | 2-         | anic | e  | 8- | 0 | 0 | 0 | 0 | 0.098 | 20 | 30 | 20 | 30 | 8±0.0 | 000 | 0 | 10 | 000 | ±0.051 | 000 | 000 | 00   | 000 | 3±0.0 |     | 71 | 67 | 62     |        |            |            |
| 12 | -   | 0  | 0  | 2.0 | C5H | Methylsuc  | acid | e  | 21 | 0 | 0 | 0 | 0 | 5±0.0 | 00 | 00 | 00 | 00 | 653   |     | 0 | 00 |     |        |     |     |      |     | 5940  | 10  | 20 | 30 | 0.135± |        |            |            |
| 85 | H]- | 3  | 0  | 4   | 8O4 | cinic acid | s    | p  | -5 | 0 | 0 | 0 | 0 | 469   |    |    |    |    |       |     | 0 |    |     |        |     |     |      |     | 00    | 00  | 00 | 00 | 0.0905 | -      | -          |            |
|    |     |    |    |     |     |            |      | Bi |    | 2 | 3 | 3 | 3 |       |    |    |    |    |       |     |   |    |     |        |     |     |      |     |       |     |    |    |        |        |            |            |
|    |     | 1  |    |     |     |            |      | o  | 13 | 9 | 0 | 0 | 0 |       |    |    |    |    |       |     | 6 |    |     |        |     |     |      |     |       |     |    |    |        |        |            |            |
| kz |     | 3  | 8  |     |     | (S)-(-)-2- | Org  | D  | 74 | 6 | 2 | 0 | 0 |       | 58 | 61 | 58 | 64 | 0.163 | 852 | 5 | 80 | 610 | 0.0177 | 476 | 514 | 5060 | 566 | 0.077 |     |    |    |        |        |            |            |
| 00 | [M  | 1. | 5. | 13  | C6H | Hydroxyis  | anic | e  | 8- | 0 | 0 | 0 | 0 | 0.049 | 00 | 10 | 30 | 40 | 5±0.0 | 00  | 0 | 00 | 00  | ±0.026 | 000 | 000 | 00   | 000 | 7±0.0 |     | 25 | 31 | 26     |        |            |            |
| 12 | -   | 0  | 0  | 2.0 | 12O | ocaproic   | acid | e  | 90 | 0 | 0 | 0 | 0 | 5±0.0 | 00 | 00 | 00 | 00 | 8     |     | 0 | 0  |     |        |     |     |      |     | 2400  | 90  | 90 | 20 | 0.056± |        |            |            |
| 87 | H]- | 7  | 0  | 8   | 3   | acid       | s    | p  | -8 | 0 | 0 | 0 | 0 | 19    |    |    |    |    |       |     | 0 |    |     |        |     |     |      |     | 00    | 00  | 00 | 00 | 0.0571 | -      | -          |            |
|    |     |    |    |     |     |            |      | Bi |    | 6 | 9 | 7 | 7 |       |    |    |    |    |       |     | 1 |    |     |        |     |     |      |     |       |     |    |    |        |        |            |            |
|    |     | 1  |    |     |     |            |      | o  | 4  | 8 | 6 | 0 |   |       |    |    |    |    |       |     | 3 |    |     |        |     |     |      |     |       |     |    |    |        |        |            |            |
| kz |     | 3  | 7  |     |     |            | Org  | D  | 63 | 9 | 8 | 6 | 8 |       | 48 | 41 | 49 | 53 | 0.130 | 149 | 2 | 17 | 164 | 0.0375 | 155 | 151 | 1530 | 164 | 0.234 |     |    | 10 |        |        |            |            |
| 00 | [M  | 3. | 1. | 13  |     |            | anic | e  | 6- | 0 | 0 | 0 | 0 | 0.127 | 70 | 60 | 30 | 90 | 7±0.1 | 000 | 0 | 20 | 000 | ±0.042 | 000 | 000 | 1530 | 000 | 7±0.0 |     | 91 | 70 | 92     | 0.1958 |            |            |
| 12 | -   | 0  | 0  | 4.0 | C4H |            | acid | e  | 61 | 0 | 0 | 0 | 0 | 9±0.2 | 00 | 00 | 00 | 00 | 187   |     | 0 | 00 |     |        |     | 0   | 0    | 25  | 8650  | 40  | 00 | 30 | ±0.138 |        |            |            |
| 89 | H]- | 1  | 0  | 2   | 6O5 | Malic acid | s    | p  | -3 | 0 | 0 | 0 | 0 | 466   |    |    |    |    |       |     | 0 |    |     |        |     |     |      |     | 00    | 00  | 0  | 00 | 1      | -      | -          |            |
|    |     |    |    |     |     |            |      |    | 1  |   |   | 1 |   |       |    |    |    |    |       |     | 1 |    |     |        |     |     |      |     |       |     |    |    |        |        |            |            |
|    |     | 1  |    |     |     |            |      | Bi |    | 0 | 9 | 9 | 0 |       |    |    |    |    |       |     | 0 |    |     |        |     |     |      |     |       |     |    |    |        |        |            |            |
|    |     | 1  |    |     |     |            |      | o  | 35 | 4 | 6 | 9 | 4 |       | 11 | 12 | 12 | 11 | 0.321 | 110 | 7 | 11 | 109 | 0.2668 | 143 | 142 | 1440 | 148 | 0.217 |     |    |    |        |        |            |            |
| kz |     | 4  | 5  |     |     |            | Org  | D  | 88 | 0 | 5 | 7 | 0 |       | 70 | 10 | 20 | 50 | 4±0.1 | 000 | 0 | 30 | 000 | ±0.067 | 000 | 000 | 1440 | 000 | 5±0.0 |     | 11 | 17 | 12     |        |            |            |
| 00 | [M  | 1. | 9. | 14  |     | Trans,tran | anic | e  | -  | 0 | 0 | 0 | 0 | 0.167 | 00 | 00 | 00 | 00 | 191   | 0   | 0 | 00 | 0   | 9      | 0   | 0   | 000  | 0   | 351   |     | 20 | 90 | 10     | 0.2708 |            |            |
| 12 | -   | 0  | 0  | 2.0 | C6H | s-Muconic  | acid | e  | 17 | 0 | 0 | 0 | 0 | 2±0.1 | 0  | 0  | 0  | 0  |       |     | 0 |    |     |        |     |     |      |     | 1110  | 00  | 00 | 00 | ±0.600 |        |            |            |
| 91 | H]- | 2  | 0  | 3   | 6O4 | acid       | s    | p  | -8 | 0 | 0 | 0 | 0 | 469   |    |    |    |    |       |     | 0 |    |     |        |     |     |      |     | 000   | 0   | 0  | 0  | 2      | -      | -          |            |
|    |     |    |    |     |     |            |      | Bi |    | 2 | 2 | 2 | 2 |       |    |    |    |    |       |     | 1 |    |     |        |     |     |      |     |       |     |    |    |        |        |            |            |
|    |     | 1  |    |     |     |            |      | o  | 30 | 1 | 6 | 2 | 2 |       |    |    |    |    |       |     | 0 |    |     |        |     |     |      |     |       |     |    |    |        |        |            |            |
| kz |     | 4  | 8  |     |     | 4-         | Org  | D  | 25 | 3 | 5 | 2 | 3 |       | 13 | 14 | 14 | 14 | 0.038 | 929 | 8 | 98 | 893 | 0.0236 | 131 | 122 | 1220 | 132 | 0.191 |     |    |    |        |        |            |            |
| 00 | [M  | 6. | 6. | 14  | C6H | Acetamid   | anic | e  | -  | 0 | 0 | 0 | 0 | 0.038 | 60 | 70 | 20 | 30 | 4±0.0 | 00  | 0 | 0  | 00  | ±0.023 | 000 | 000 | 1220 | 000 | ±0.04 |     | 18 | 22 | 21     | 0.0422 | C0         |            |
| 12 | +H] | 0  | 0  | 5.0 | 11N | obutyric   | acid | e  | 96 | 0 | 0 | 0 | 0 | ±0.03 | 00 | 00 | 00 | 00 | 158   |     | 0 | 0  |     |        | 0   | 0   |      |     | 1770  | 90  | 90 | 70 | ±0.045 | 29     |            |            |
| 92 | +   | 8  | 0  | 7   | O3  | acid       | s    | p  | -5 | 0 | 0 | 0 | 0 | 21    |    |    |    |    |       |     | 0 |    |     |        |     |     |      |     | 00    | 00  | 00 | 00 | 8      | 46     | ko00330,ko |            |
| kz |     | 1  | 8  |     |     | 4-         | Org  | Bi | 46 | 1 | 1 | 1 | 1 |       |    |    |    |    |       |     | 1 | 17 |     |        |     |     |      |     |       | 26  | 26 | 25 |        |        |            |            |
| 00 | [M  | 4  | 7. | 14  | C5H | Guanidino  | anic | o  | 3- | 3 | 4 | 1 | 3 | 0.218 | 56 | 57 | 62 | 58 | 0.158 | 167 | 6 | 90 | 171 | 0.4152 | 495 | 508 | 4990 | 548 | 0.772 |     | 10 | 40 | 10     | 0.5358 | C0         |            |
| 12 | +H] | 6. | 0  | 5.0 | 11N | butyric    | acid | D  | 00 | 3 | 2 | 6 | 8 | 4±0.2 | 70 | 90 | 00 | 20 | 8±0.0 | 000 | 6 | 00 | 0   | ±0.169 | 000 | 000 | 4990 | 000 | 3±0.1 |     | 00 | 00 | 00     | ±0.047 | 10         | ko00330,ko |
| 93 | +   | 0  | 0  | 9   | 3O2 | acid       | s    | e  | -3 | 0 | 0 | 0 | 0 | 248   | 00 | 00 | 00 | 00 | 547   | 0   | 0 | 0  | 2   |        | 0   | 0   |      | 0   | 947   | 000 | 0  | 0  | 0      | 5      | 35         | 01100      |

[illegible]

[illegible]

|    |     |    |    |     |     |            |      |    |    |   |   |   |   |       |    |    |    |    |       |     |    |    |     |        |     |        |      |      |       |       |       |       |        |        |            |            |
|----|-----|----|----|-----|-----|------------|------|----|----|---|---|---|---|-------|----|----|----|----|-------|-----|----|----|-----|--------|-----|--------|------|------|-------|-------|-------|-------|--------|--------|------------|------------|
| 13 | H]- | 1. | 0  | 6   | 6   |            | acid | D  | 95 | 7 | 4 | 0 | 1 | 938   | 00 | 00 | 00 | 00 | 461   | 0   | 9  | 00 | 0   | 3      |     |        | 245  |      | 00    | 00    | 00    |       | 96     |        |            |            |
| 18 |     | 0  | 0  |     |     |            | s    | e  | -2 | 0 | 0 | 0 | 0 |       | 0  | 0  | 0  | 0  |       | 0   | 0  |    |     |        |     |        |      | 0    | 0     | 0     |       |       |        |        |            |            |
|    |     | 6  |    |     |     |            |      | e  |    | 0 | 0 | 0 | 0 |       |    |    |    |    |       | 0   |    |    |     |        |     |        |      |      |       |       |       |       |        |        |            |            |
|    |     |    |    |     |     |            |      | p  |    | 0 | 0 | 0 | 0 |       |    |    |    |    |       | 0   |    |    |     |        |     |        |      |      |       |       |       |       |        |        |            |            |
|    |     |    |    |     |     |            |      |    |    | 0 | 0 | 0 | 0 |       |    |    |    |    |       | 0   |    |    |     |        |     |        |      |      |       |       |       |       |        |        |            |            |
|    |     |    |    |     |     |            |      | Bi |    | 4 | 4 | 5 | 5 |       |    |    |    |    |       | 5   |    |    |     |        |     |        |      |      |       |       |       |       |        |        |            |            |
|    |     | 1  |    |     |     | D-         |      | o  |    | 1 | 9 | 2 | 9 |       |    |    |    |    |       | 0   |    |    |     |        |     |        |      |      |       |       |       |       |        |        |            |            |
| kz |     | 9  | 7  |     |     | Galacturo  | Org  | D  | 68 | 1 | 0 | 3 | 3 |       | 68 | 60 | 65 | 59 | 0.171 |     | 48 |    |     |        | 137 | 131    | 1300 | 154  | 2.077 |       | 62    | 60    | 60     |        | ko00040,ko |            |
| 00 | [M  | 3. | 2. | 19  | C6H | nic        | anic | e  | 5- | 0 | 0 | 0 | 0 | 0.083 | 50 | 00 | 60 | 70 | 7±0.1 | 473 | 0  | 90 | 491 | 0.1187 | 000 | 000    | 1300 | 000  | 7±1.0 |       | 20    | 30    | 00     | C0     | 00053,ko00 |            |
| 13 | -   | 0  | 8  | 4.0 | 100 | acid(Gal   | acid | e  | 73 | 0 | 0 | 0 | 0 | 1±0.1 | 00 | 00 | 00 | 00 | 159   |     | 0  | 00 | 000 | ±0.044 | 00  | 00     | 0000 | 00   | 409   | 5900  | 00    | 00    | 00     | 1.2553 | 03         | 520,ko0110 |
| 19 | H]- | 4  | 0  | 4   | 7   | A)         | s    | p  | -4 | 0 | 0 | 0 | 0 | 409   |    |    |    |    |       | 0   |    |    |     |        |     |        |      |      | 000   | 0     | 0     | 0     | ±0.353 | 33     | 0,ko02010  |            |
|    |     |    |    |     |     |            |      | Bi |    |   |   |   |   |       |    |    |    |    |       | 1   |    |    |     |        |     |        |      |      |       |       |       |       |        |        |            |            |
|    |     | 2  | 2  |     |     |            |      | o  |    |   | 1 |   |   |       |    |    |    |    |       | 1   |    |    |     |        |     |        |      |      |       |       |       |       |        |        |            |            |
| kz |     | 2  | 1  |     |     |            | Org  | D  | 69 | 8 | 0 | 9 | 9 |       | 98 | 87 | 87 | 92 | 0.002 |     | 10 |    |     | 0.0027 |     | 132    | 134  | 1260 | 124   | 0.001 |       | 12    | 21     | 12     | 0.0032     | C0         |
| 00 | [M  | 9. | 1. | 23  | C12 |            | anic | e  | 3- | 7 | 3 | 2 | 7 | 0.001 | 30 | 80 | 40 | 00 | 5±0.0 | 112 | 5  | 90 | 107 | ±0.001 | 00  | 00     | 0    | 00   | 9±0.0 |       |       |       |        |        |            |            |
| 13 | -   | 1  | 0  | 0.1 | H22 | Dodecane   | acid | e  | 23 | 3 | 0 | 7 | 6 | 6±0.0 |    |    |    |    | 014   |     | 0  |    |     | 1      |     |        |      |      | 1380  | 50    | 90    | 80    | ±0.008 | 26     |            |            |
| 25 | H]- | 4  | 0  | 5   | O4  | dioic acid | s    | p  | -2 | 0 | 0 | 0 | 0 | 007   |    |    |    |    |       | 0   |    |    |     |        |     |        |      |      | 0     | 0     | 0     | 0     | 4      | 78     | --         |            |
|    |     |    |    |     |     |            |      | Bi | 10 |   |   |   |   |       |    |    |    |    |       |     | 1  |    |     |        |     |        |      |      |       |       |       |       |        |        |            |            |
|    |     | 5  | 2  |     |     |            |      | o  | 38 | 2 | 3 | 3 | 3 |       |    |    |    |    |       | 1   |    |    |     |        |     |        |      |      |       |       |       |       |        |        |            |            |
| kz |     | 7  | 8  |     |     |            | D    | 83 | 7  | 5 | 4 | 1 |   |       | 51 | 49 | 52 | 49 | 0.013 |     | 22 |    |     | 0.0043 |     | 443    | 435  | 3760 | 352   | 0.006 |       |       |        |        |            |            |
| 00 | [M  | 7. | 7. | 57  | C30 |            | Flav | e  | -  | 2 | 6 | 8 | 1 | 0.005 | 90 | 80 | 00 | 50 | 7±0.0 | 136 | 9  | 70 | 227 | ±0.014 | 00  | 00     | 0    | 00   | 1±0.0 |       |       |       |        |        |            |            |
| 13 | +H] | 1  | 0  | 6.1 | H24 | Procyanidi | onoi | e  | 03 | 0 | 0 | 0 | 0 | 3±0.0 | 0  | 0  | 0  | 0  | 038   |     | 0  |    |     | 1      |     |        |      |      |       |       |       |       |        |        |            |            |
| 31 | +   | 3  | 0  | 3   | O12 | n A1       | ds   | p  | -0 | 0 | 0 | 0 | 0 | 06    |    |    |    |    |       | 0   |    |    |     |        |     |        |      |      | -     | -     | -     | -     | -      | -      | -          |            |
|    |     |    |    |     |     |            |      |    |    | 1 | 1 | 1 | 1 |       |    |    |    |    |       | 2   |    |    |     |        |     |        |      |      |       |       |       |       |        |        |            |            |
|    |     |    |    |     |     |            |      | Bi |    | 1 | 3 | 2 | 4 |       |    |    |    |    |       | 0   |    |    |     |        |     |        |      |      |       |       |       |       |        |        |            |            |
|    |     | 5  | 4  |     |     |            |      | o  | 29 | 9 | 2 | 4 | 1 |       | 46 | 46 | 48 | 44 | 0.125 | 233 | 8  | 21 |     |        | 120 | 117    | 1200 | 138  | 0.186 |       |       |       |        |        |            |            |
| kz |     | 7  | 0  |     |     |            | D    | 10 | 0  | 0 | 0 | 0 | 0 |       | 90 | 20 | 40 | 40 | 8±0.0 | 000 | 0  | 70 | 227 | ±0.188 | 000 | 000    | 1200 | 138  | 3±0.0 |       |       |       |        |        |            |            |
| 00 | [M  | 7. | 7. | 57  | C30 |            | Flav | e  | 6- | 0 | 0 | 0 | 0 | 0.212 | 00 | 00 | 00 | 00 | 495   | 0   | 0  | 00 | 0   | 7      |     | 0      | 0    | 0    | 921   |       |       |       |        |        | C1         |            |
| 13 | -   | 1  | 1  | 8.1 | H26 | Procyanidi | onoi | e  | 49 | 0 | 0 | 0 | 0 | 9±0.1 |    |    |    |    |       |     | 0  |    |     |        |     |        |      |      |       |       |       |       |        |        | 76         |            |
| 32 | H]- | 4  | 0  | 4   | O12 | n B2       | ds   | p  | -8 | 0 | 0 | 0 | 0 | 546   |    |    |    |    |       | 0   |    |    |     |        |     |        |      |      | -     | -     | -     | -     | -      | 39     | --         |            |
|    |     |    |    |     |     |            |      |    |    |   |   |   |   |       |    |    |    |    |       | 1   |    |    |     |        |     |        |      |      |       |       |       |       |        |        |            |            |
|    |     |    |    |     |     |            |      | Bi |    | 9 | 9 | 8 | 9 |       |    |    |    |    |       | 5   |    |    |     |        |     |        |      |      |       |       |       |       |        |        |            |            |
|    |     | 5  | 4  |     |     |            |      | o  | 23 | 0 | 4 | 7 | 3 |       | 35 | 30 | 32 | 33 | 0.089 | 173 | 5  | 16 |     |        | 177 |        |      |      |       |       |       |       |        |        |            |            |
| kz |     | 7  | 0  |     |     |            | D    | 56 | 1  | 7 | 1 | 4 |   |       | 50 | 50 | 80 | 10 | 2±0.0 | 000 | 0  | 20 |     |        | 917 | 889    | 8710 | 990  | 0.138 |       |       |       |        |        |            |            |
| 00 | [M  | 7. | 7. | 57  | C30 |            | Flav | e  | 7- | 0 | 0 | 0 | 0 | 0.150 | 00 | 00 | 00 | 00 | 507   | 0   | 0  | 00 | 0   | ±0.195 | 000 | 000    | 8710 | 990  | 1±0.0 |       |       |       |        |        |            |            |
| 13 | -   | 1  | 1  | 8.1 | H26 | Procyanidi | onoi | e  | 23 | 0 | 0 | 0 | 0 | 9±0.0 |    |    |    |    |       |     | 0  |    |     |        |     |        |      |      |       |       |       |       |        |        |            |            |
| 33 | H]- | 4  | 0  | 4   | O12 | n B3       | ds   | p  | -9 | 0 | 0 | 0 | 0 | 671   |    |    |    |    |       | 0   |    |    |     |        |     |        |      |      | -     | -     | -     | -     | -      | -      | -          |            |
|    |     | 5  | 4  |     |     |            |      | Bi | 20 | 9 | 1 | 1 | 1 |       |    |    |    |    |       | 1   |    |    |     |        |     |        |      |      |       |       |       |       |        |        |            |            |
| kz |     | 7  | 2  |     |     |            |      | o  | 31 | 9 | 0 | 0 | 0 |       | 38 | 34 | 37 | 33 | 0.097 | 189 | 6  | 17 |     |        | 185 | 0.4325 |      | 987  | 958   | 9650  | 107   | 0.149 |        |        |            |            |
| 00 | [M  | 7. | 5. | 57  | C30 |            | Flav | D  | 5- | 3 | 5 | 2 | 8 | 0.171 | 70 | 00 | 30 | 40 | ±0.06 | 000 | 4  | 40 |     |        | 000 | ±0.212 | 000  | 000  | 9650  | 107   | 9±0.0 |       |        |        |            |            |
| 13 | -   | 1  | 1  | 8.1 | H26 | Procyanidi | onoi | e  | 25 | 0 | 0 | 0 | 0 | 1±0.0 | 00 | 00 | 00 | 00 | 91    | 0   | 0  | 0  | 0   | 2      |     | 000    | 000  | 0    | 34    |       |       |       |        |        |            |            |
| 35 | H]- | 4  | 0  | 4   | O12 | n B1       | ds   | e  | -7 | 0 | 0 | 0 | 0 | 611   |    |    |    |    |       | 0   |    |    |     |        |     |        |      |      | -     | -     | -     | -     | -      | -      | -          |            |

|    |     |    |    |     |     |            |           |    |    |           |    |   |   |   |       |    |    |    |    |       |  |     |    |    |     |        |     |      |      |      |       |        |    |    |    |  |  |  |
|----|-----|----|----|-----|-----|------------|-----------|----|----|-----------|----|---|---|---|-------|----|----|----|----|-------|--|-----|----|----|-----|--------|-----|------|------|------|-------|--------|----|----|----|--|--|--|
|    |     |    |    |     |     |            |           |    |    | p         | 0  | 0 | 0 | 0 |       |    |    |    |    |       |  |     |    |    | 0   |        |     |      |      |      |       |        |    |    |    |  |  |  |
|    |     |    |    |     |     |            |           |    |    |           |    | 0 | 0 | 0 |       |    |    |    |    |       |  |     |    |    | 0   |        |     |      |      |      |       |        |    |    |    |  |  |  |
|    |     |    |    |     |     |            |           |    |    | Bi        |    |   |   |   |       |    |    |    |    |       |  |     |    |    | 2   |        |     |      |      |      |       |        |    |    |    |  |  |  |
|    |     |    |    |     |     |            |           |    |    | o         | 37 | 7 | 8 | 7 | 8     |    |    |    |    |       |  |     |    |    |     | 3      |     |      |      |      |       |        |    |    |    |  |  |  |
| kz |     |    | 8  | 5   |     |            |           |    |    | D         | 06 | 3 | 4 | 2 | 1     | 33 | 36 | 40 | 28 | 0.009 |  | 229 | 7  | 22 | 218 | 0.0552 | 492 | 689  | 6360 | 842  | 0.01± |        |    |    |    |  |  |  |
| 00 | [M  | 7. | 7. | 86  | C45 |            | Flav      | e  | 4- | 4         | 7  | 2 | 5 |   | 0.012 | 50 | 80 | 90 | 10 | 4±0.0 |  | 000 | 0  | 40 | 000 | ±0.024 | 00  | 00   | 0    | 00   | 0.019 |        |    |    |    |  |  |  |
| 13 | +H] | 2  | 1  | 6.2 | H38 | Procyanidi | onoi      | e  | 31 | 0         | 0  | 0 | 0 |   | 9±0.0 | 0  | 0  | 0  | 0  | 15    |  | 0   | 00 | 00 | 3   |        |     |      |      |      | 8     |        |    |    |    |  |  |  |
| 40 | +   | 1  | 3  | 1   | O18 | n C2       | ds        | p  | -6 | 0         | 0  | 0 | 0 |   | 086   |    |    |    |    |       |  |     |    |    |     |        |     | 0    |      |      |       |        |    |    |    |  |  |  |
|    |     |    |    |     |     |            |           |    |    | Quercetin |    |   |   |   |       |    |    |    |    |       |  |     |    |    |     | 1      |     |      |      |      |       |        |    |    |    |  |  |  |
|    |     |    |    |     |     |            |           |    |    | -O-       |    |   |   |   |       |    |    |    |    |       |  |     |    |    |     | 7      |     |      |      |      |       |        |    |    |    |  |  |  |
| kz |     |    | 7  | 3   |     |            |           |    |    | D         |    | 8 | 6 | 3 | 7     | 59 | 47 | 68 | 78 | 0.001 |  | 216 | 0  | 16 | 222 | 0.0466 | 102 | 668  | 8430 | 676  | 0.001 |        |    |    |    |  |  |  |
| 00 | [M  | 7. | 3. | 75  | C33 | -O-        | Flav      | e  |    | 6         | 6  | 4 | 3 |   | 0.001 | 00 | 10 | 20 | 40 | 7±0.0 |  | 000 | 0  | 00 | 000 | ±0.070 | 00  | 0    |      |      | 2±0.0 |        |    |    |    |  |  |  |
| 13 | +H] | 2  | 0  | 6.2 | H40 | rhamnosi   | onoi      | e  |    | 3         | 6  | 2 | 9 |   | 1±0.0 |    |    |    |    | 034   |  | 0   | 00 | 0  | 8   |        |     |      |      |      | 026   | 1750   | 16 | 16 | 14 |  |  |  |
| 80 | +   | 2  | 5  | 1   | O20 | de         | ds        | p  | -  | 0         | 0  | 0 | 0 |   | 049   |    |    |    |    |       |  |     |    |    |     |        |     | 0    |      |      |       |        |    |    |    |  |  |  |
|    |     |    |    |     |     |            |           |    |    |           | 1  | 1 | 1 | 1 |       |    |    |    |    |       |  |     |    |    |     | 2      |     |      |      |      |       |        |    |    |    |  |  |  |
|    |     |    |    |     |     |            |           |    |    | Bi        | 9  | 9 | 9 | 8 |       | 15 | 16 | 17 | 16 |       |  | 239 | 5  | 22 | 221 | 0.5635 | 210 | 214  | 2070 | 207  | 0.316 |        |    |    |    |  |  |  |
| kz |     |    | 1  |     |     |            | Phe       | o  |    | 5         | 1  | 9 | 4 |   |       | 20 | 10 | 20 | 60 | 0.440 |  | 000 | 0  | 20 | 000 | ±0.317 | 000 | 000  | 000  | 000  | ±0.12 |        |    |    |    |  |  |  |
| 00 | [M  | 7. | 7. | 12  |     | 5-         | noli      | D  |    | 0         | 0  | 0 | 0 |   | 0.317 | 00 | 00 | 00 | 00 | 2±0.2 |  | 0   | 0  | 00 | 0   | ±0.317 | 0   | 0    | 000  | 0    | 06    | 26     | 25 | 27 |    |  |  |  |
| 15 | +H] | 0  | 0  | 6.0 | C6H | Hydroxym   | c         | e  |    | 0         | 0  | 0 | 0 |   | 9±0.2 | 0  | 0  | 0  | 0  | 012   |  | 0   | 0  | 0  | 0   |        |     |      |      |      |       | 60     | 40 | 00 |    |  |  |  |
| 62 | +   | 4  | 0  | 3   | 6O3 | ethylfurfu | acid      | e  |    | 0         | 0  | 0 | 0 |   | 362   |    |    |    |    |       |  |     |    |    |     |        |     | 2380 | 00   | 00   | 00    | ±0.344 | 11 |    |    |  |  |  |
|    |     |    |    |     |     |            |           |    |    | s         | p  | - | 0 | 0 | 0     |    |    |    |    |       |  |     |    |    |     |        |     | 000  | 0    | 0    | 0     | 1      | 01 | -- |    |  |  |  |
|    |     |    |    |     |     |            |           |    |    |           | 1  | 1 | 1 | 1 |       |    |    |    |    |       |  |     |    |    |     | 1      |     |      |      |      |       |        |    |    |    |  |  |  |
|    |     |    |    |     |     |            |           |    |    | Bi        | 10 | 1 | 2 | 2 | 1     |    |    |    |    |       |  |     |    |    |     | 3      |     |      |      |      |       |        |    |    |    |  |  |  |
|    |     |    |    |     |     |            |           |    |    | o         | 54 | 4 | 9 | 0 | 4     | 40 | 45 | 43 | 40 | 0.115 |  | 134 | 2  | 14 | 139 | 0.3368 | 154 | 128  | 1290 | 146  | 0.209 |        |    |    |    |  |  |  |
| kz |     |    | 4  | 3   |     |            |           |    |    | D         | 71 | 0 | 0 | 0 | 0     | 30 | 90 | 70 | 90 | 6±0.0 |  | 000 | 0  | 90 | 000 | ±0.200 | 000 | 000  | 000  | 000  | 8±0.1 |        |    |    |    |  |  |  |
| 00 | [M  | 9. | 7. | 47  | C23 |            |           | e  | -  | 0         | 0  | 0 | 0 |   | 0.196 | 00 | 00 | 00 | 00 | 837   |  | 0   | 0  | 0  | 0   | 8      | 0   | 0    | 000  | 0    | 636   | 67     | 11 | 11 |    |  |  |  |
| 15 | +H] | 1  | 0  | 8.1 | H26 | Calceorios | Oth       | e  | 98 | 0         | 0  | 0 | 0 |   | 8±0.0 |    |    |    |    |       |  | 0   | 0  | 0  |     |        |     |      |      |      | 1060  | 70     | 70 | 30 |    |  |  |  |
| 81 | +   | 5  | 6  | 5   | O11 | ide B      | ers       | p  | -5 | 0         | 0  | 0 | 0 |   | 883   |    |    |    |    |       |  |     |    |    |     |        |     | 00   | 0    | 00   | 00    | 0.021± |    |    |    |  |  |  |
|    |     |    |    |     |     |            |           |    |    | Bi        |    |   |   |   |       |    |    |    |    |       |  |     |    |    |     |        |     |      |      |      |       | 0.047  | -  | -  |    |  |  |  |
|    |     |    |    |     |     |            |           |    |    | o         | 33 | 1 | 3 | 2 | 2     |    |    |    |    |       |  |     |    |    |     |        |     |      |      |      |       |        |    |    |    |  |  |  |
| kz |     |    | 3  | 8   |     |            | Quercetin |    |    | D         | 06 | 7 | 0 | 8 | 3     | 50 | 68 | 59 | 78 | 0.001 |  |     |    |    |     |        |     | 286  | 338  | 3650 | 335   | 0.005  |    |    |    |  |  |  |
| 00 | [M  | 1. | 7. | 33  | C17 | -3',4'-    | Flav      | e  | -  | 6         | 3  | 9 | 2 |   | 0.004 | 00 | 80 | 20 | 00 | 7±0.0 |  |     |    |    |     |        |     | 00   | 00   | 0    | 00    | ±0.00  |    |    |    |  |  |  |
| 15 | +H] | 0  | 0  | 0.0 | H14 | dimethyl   | onoi      | e  | 29 | 0         | 0  | 0 | 0 |   | 1±0.0 |    |    |    |    |       |  |     |    |    |     |        |     |      |      |      |       | 56     |    |    |    |  |  |  |
| 84 | +   | 8  | 5  | 7   | O7  | ether      | ds        | p  | -4 | 0         | 0  | 0 | 0 |   | 105   |    |    |    |    |       |  |     |    |    |     |        |     | -    | -    | -    | -     | -      | -  | -  |    |  |  |  |
|    |     |    |    |     |     |            |           |    |    | Bi        |    |   |   |   |       |    |    |    |    |       |  |     |    |    |     |        |     |      |      |      |       |        |    |    |    |  |  |  |
|    |     |    |    |     |     |            |           |    |    | o         |    | 3 | 3 | 2 | 2     |    |    |    |    |       |  |     |    |    |     | 1      |     |      |      |      |       |        |    |    |    |  |  |  |
| kz |     |    | 4  | 3   |     |            |           |    |    | D         |    | 1 | 0 | 2 | 3     | 92 | 22 | 15 | 95 | 0.003 |  | 188 | 3  | 18 | 147 | 0.004± | 106 | 995  | 1080 | 790  | 0.014 |        |    |    |    |  |  |  |
| 00 | [M  | 9. | 7. | 47  | C22 |            | Flav      | e  |    | 4         | 0  | 7 | 2 |   | 0.004 | 20 | 10 | 70 | 20 | 8±0.0 |  | 00  | 2  | 70 | 00  | 0.0066 | 000 | 00   | 00   | 00   | 8±0.0 |        |    |    |    |  |  |  |
| 15 | +H] | 1  | 0  | 8.1 | H22 | Isotamarix | onoi      | e  |    | 0         | 0  | 0 | 0 |   | 4±0.0 |    | 0  | 0  |    | 171   |  | 0   | 0  | 0  |     |        |     |      |      |      | 234   | 1770   | 16 | 22 | 18 |  |  |  |
| 86 | +   | 2  | 6  | 1   | O12 | in         | ds        | p  | -  | 0         | 0  | 0 | 0 |   | 102   |    |    |    |    |       |  |     |    |    |     |        |     | 00   | 00   | 00   | 00    | 4      | -  | -  |    |  |  |  |
| kz | [M  | 1  | 8  | 14  | C7H | Stachydrin | Alka      | Bi |    | 9         | 9  | 8 | 8 |   | 0.146 | 10 | 98 | 10 | 10 | 0.276 |  | 397 | 3  | 44 | 409 | 0.0983 | 101 | 861  | 8300 | 893  | 0.135 | 4760   | 47 | 52 | 49 |  |  |  |
| 00 | +H] | 4  | 4. | 3.0 | 13N | e          | loid      | o  | -  | 0         | 5  | 5 | 5 |   | 9±0.0 | 30 | 90 | 50 | 20 | 5±0.0 |  | 000 | 7  | 00 | 000 | ±0.069 | 000 | 000  | 00   | 000  | 4±0.1 | 00     | 80 | 10 | 20 |  |  |  |
|    |     |    |    |     |     |            |           |    |    |           |    |   |   |   |       |    |    |    |    |       |  |     |    |    |     |        |     |      |      |      |       | ±0.029 | 01 | -- |    |  |  |  |

|    |     |    |    |     |     |             |      |    |   |   |   |   |       |       |    |    |    |       |       |     |     |    |     |        |        |     |      |       |       |       |      |    |    |        |        |    |   |
|----|-----|----|----|-----|-----|-------------|------|----|---|---|---|---|-------|-------|----|----|----|-------|-------|-----|-----|----|-----|--------|--------|-----|------|-------|-------|-------|------|----|----|--------|--------|----|---|
| 15 | +   | 4. | 1  | 9   | O2  |             | s    | D  | 0 | 2 | 4 | 2 | 983   | 00    | 00 | 00 | 00 | 439   |       | 2   | 00  |    | 5   |        | 0      |     |      |       | 14    |       | 00   | 00 | 00 | 1      |        | 72 |   |
| 98 |     | 1  | 0  |     |     |             | e    |    | 0 | 0 | 0 | 0 |       | 0     |    | 0  | 0  |       |       | 0   |     |    |     |        |        |     |      |       |       |       |      |    |    |        |        |    |   |
|    |     | 0  |    |     |     |             | e    |    | 0 | 0 | 0 | 0 |       |       |    |    |    |       |       | 0   |     |    |     |        |        |     |      |       |       |       |      |    |    |        |        |    |   |
|    |     |    |    |     |     |             | p    |    | 0 | 0 | 0 | 0 |       |       |    |    |    |       |       | 0   |     |    |     |        |        |     |      |       |       |       |      |    |    |        |        |    |   |
|    |     |    |    |     |     |             | Bi   |    |   |   |   |   |       |       |    |    |    |       |       | 2   |     |    |     |        |        |     |      |       |       |       |      |    |    |        |        |    |   |
|    |     | 2  | 1  |     |     |             | Phe  | o  | 2 | 2 | 2 | 2 |       |       |    |    |    |       |       | 0   |     |    |     |        |        |     |      |       |       |       |      |    |    |        |        |    |   |
| kz |     | 1  | 6  |     |     |             | noli | D  | 6 | 6 | 7 | 9 |       | 44    | 32 | 35 | 33 | 0.009 |       | 226 | 2   | 23 |     |        |        |     |      | 0.061 |       |       |      |    |    |        |        |    |   |
| 00 | [M  | 3. | 7. | 21  | C10 |             | c    | e  | 4 | 5 | 2 | 3 | 0.004 | 40    | 20 | 10 | 20 | 8±0.0 |       | 000 | 0   | 60 | 212 | 0.0532 | 414    | 419 | 4230 | 371   | 4±0.0 |       |      | 13 | 13 | 13     |        |    |   |
| 16 | +H] | 0  | 0  | 2.0 | H12 | Oresbiusi   | acid | e  | 0 | 0 | 0 | 0 | 5±0.0 | 0     | 0  | 0  | 0  | 152   |       | 0   | 0   | 00 | 000 | ±0.035 | 000    | 000 | 00   | 000   | 529   |       | 1260 | 70 | 80 | 70     | 0.028± |    |   |
| 37 | +   | 8  | 7  | 7   | O5  | n A         | s    | p  | - | 0 | 0 | 0 | 0     | 032   |    |    |    |       |       | 0   |     |    |     |        |        |     |      |       |       | 00    | 00   | 00 | 00 | 0.0109 | -      | -  |   |
|    |     |    |    |     |     |             | Bi   |    |   |   |   |   |       |       |    |    |    |       |       |     |     |    |     |        |        |     |      |       |       |       |      |    |    |        |        |    |   |
|    |     | 3  | 2  |     |     | 5'-         | Phe  | o  | 4 | 3 | 3 | 4 |       |       |    |    |    |       |       | 3   |     |    |     |        |        |     |      |       |       |       |      |    |    |        |        |    |   |
| kz |     | 8  | 0  |     |     | Glucopyra   | noli | D  | 1 | 8 | 9 | 2 |       | 70    | 80 | 89 | 82 | 0.021 |       | 410 | 3   | 38 |     |        |        |     |      | 0.010 |       |       |      |    |    |        |        |    |   |
| 00 | [M  | 7. | 7. | 38  | C18 | nosyloxyja  | c    | e  | 3 | 8 | 8 | 2 | 0.006 | 90    | 10 | 40 | 20 | 8±0.0 |       | 00  | 2   | 60 | 451 | 0.0096 | 706    | 743 | 6620 | 629   | 3±0.0 |       |      | 15 | 13 | 14     | 0.0309 |    |   |
| 16 | -   | 1  | 1  | 8.1 | H28 | smanic      | acid | e  | 0 | 0 | 0 | 0 | 7±0.0 | 0     | 0  | 0  | 0  | 194   |       | 0   | 0   | 0  | 00  | ±0.011 | 00     | 00  | 0    | 00    | 096   |       | 1570 | 40 | 70 | 50     | ±0.024 |    |   |
| 42 | H]- | 7  | 0  | 7   | O9  | acid        | s    | p  | - | 0 | 0 | 0 | 0     | 056   |    |    |    |       |       | 0   |     |    |     |        |        |     |      |       |       | 00    | 00   | 00 | 00 | 3      | -      | -  |   |
|    |     |    |    |     |     |             | Bi   |    |   |   |   |   |       |       |    |    |    |       |       |     |     |    |     |        |        |     |      |       |       |       |      |    |    |        |        |    |   |
|    |     | 2  | 2  |     |     | 5,7,2'-     |      | o  | 2 | 2 | 2 | 2 |       |       |    |    |    |       |       | 1   |     |    |     |        |        |     |      |       |       |       |      |    |    |        |        |    |   |
| kz |     | 9  | 8  |     |     | Trhiyroxy-  |      | D  | 7 | 9 | 4 | 6 |       | 13    | 16 | 16 | 17 | 0.004 |       | 214 | 6   | 19 |     |        |        |     |      | 0.007 |       |       |      |    |    |        |        |    |   |
| 00 | [M  | 9. | 4. | 30  | C16 | 8-          | Flav | e  | 0 | 5 | 7 | 1 | 0.004 | 80    | 50 | 70 | 10 | 3±0.0 |       | 00  | 3   | 80 | 203 | 0.0047 | 479    | 473 | 4430 | 525   | 2±0.0 |       |      |    |    | 0.0017 |        |    |   |
| 16 | -   | 0  | 0  | 0.0 | H12 | methoxyfl   | onoi | e  | 0 | 0 | 0 | 0 | 4±0.0 | 0     | 0  | 0  | 0  | 04    |       | 0   | 0   | 0  | 00  | ±0.004 | 00     | 00  | 0    | 00    | 031   |       |      | 72 | 88 | 76     | ±0.001 |    |   |
| 71 | H]- | 6  | 4  | 6   | O6  | avone       | ds   | p  | - | 0 | 0 | 0 | 0     | 037   |    |    |    |       |       | 0   |     |    |     |        |        |     |      |       |       | 9180  | 00   | 50 | 80 | 9      | -      | -  |   |
|    |     |    |    |     |     |             | Bi   |    |   |   |   |   |       |       |    |    |    |       |       |     |     |    |     |        |        |     |      |       |       |       |      |    |    |        |        |    |   |
|    |     | 3  | 2  |     |     | 6-          |      | o  |   |   |   |   |       |       |    |    |    |       |       |     |     |    |     |        |        |     |      |       |       |       |      |    |    |        |        |    |   |
| kz |     | 2  | 6  |     |     | hydroxy-    |      | D  |   |   |   |   |       |       |    |    |    |       |       |     |     |    |     |        |        |     |      |       | 0.005 |       |      |    |    |        |        |    |   |
| 00 | [M  | 9. | 8. | 32  | C18 | 5,7,4'-     | Flav | e  |   |   |   |   |       |       |    |    |    |       |       |     |     |    |     |        |        |     |      |       |       |       |      |    |    | C1     |        |    |   |
| 16 | +H] | 1  | 0  | 8.0 | H16 | trimethox   | onoi | e  |   |   |   |   |       |       |    |    |    |       |       |     |     |    |     |        |        |     |      |       |       |       |      |    |    | 49     |        |    |   |
| 80 | +   | 0  | 8  | 9   | O6  | yflavone    | ds   | p  | - | - | - | - | -     | -     | -  | -  | -  | -     | -     | -   | -   | -  | -   | -      | -      | -   | -    | -     | -     | -     | -    | -  | -  | 85     | --     |    |   |
|    |     |    |    |     |     | Tetrameth   |      | Bi |   |   |   |   |       |       |    |    |    |       |       |     |     |    |     |        |        |     |      |       |       |       |      |    |    |        |        |    |   |
|    |     | 3  | 2  |     |     | ylluteolin  |      | o  |   |   |   |   |       |       |    |    |    |       |       |     |     |    |     |        |        |     |      |       |       |       |      |    |    |        |        |    |   |
| kz |     | 4  | 9  |     |     | (3',4',5,7- |      | D  | 7 | 8 | 7 | 8 |       |       |    |    |    |       |       |     |     |    |     |        |        |     |      |       |       |       |      |    |    |        |        |    |   |
| 00 | [M  | 3. | 9. | 34  | C19 | Tetrameth   | Flav | e  | 4 | 3 | 8 | 1 | 0.001 |       |    |    |    |       |       |     |     |    |     |        |        |     |      |       |       |       |      |    |    |        |        |    |   |
| 16 | +H] | 1  | 0  | 2.1 | H18 | oxyflavon   | onoi | e  | 5 | 4 | 2 | 7 | 3±0.0 |       |    |    |    |       |       |     |     |    |     |        |        |     |      |       |       |       |      |    |    |        |        |    |   |
| 84 | +   | 2  | 9  | 1   | O6  | e)          | ds   | p  | - | 0 | 0 | 0 | 0     | 003   | -  | -  | -  | -     | -     | -   | -   | -  | -   | -      | -      | -   | -    | -     | -     | -     | -    | -  | -  | -      |        |    |   |
|    |     |    |    |     |     |             | Bi   |    |   |   |   |   |       |       |    |    |    |       |       |     |     |    |     |        |        |     |      |       |       |       |      |    |    |        |        |    |   |
|    |     | 4  | 2  |     |     |             |      | o  | 1 | 2 | 2 | 2 |       |       |    |    |    |       |       |     |     |    |     |        |        |     |      |       |       |       |      |    |    |        |        |    |   |
| kz |     | 6  | 8  |     |     |             |      | D  | 8 | 0 | 2 | 3 |       | 66    | 69 | 56 | 57 | 0.001 |       |     |     |    |     |        |        |     |      | 0.002 |       |       |      |    |    |        |        |    |   |
| 00 | [M  | 1. | 5. | 46  | C22 |             | Flav | e  | 8 | 8 | 5 | 2 | 0.003 | 10    | 00 | 30 | 90 | 7±0.0 |       |     |     |    |     |        |        |     |      | ±0.00 |       |       |      |    |    |        |        |    |   |
| 16 | +H] | 1  | 0  | 0.1 | H20 | wogonosi    | onoi | e  | 0 | 0 | 0 | 0 | 5±0.0 |       |    |    |    |       |       |     |     |    |     |        |        |     |      | 19    |       |       |      |    |    |        |        |    |   |
| 95 | +   | 0  | 8  | 0   | O11 | de          | ds   | p  | - | 0 | 0 | 0 | 0     | 035   |    |    |    |       |       | -   | -   | -  | -   | -      | -      | -   | -    |       | -     | -     | -    | -  | -  | -      |        |    |   |
| kz | [M  | 4  | 2  | 46  | C21 | Kaempfer    | Flav | Bi | 6 | 6 | 6 | 6 | 0.010 | 27    | 25 | 18 | 26 | 0.006 |       | 354 | 3   | 31 | 349 | 0.8048 | 988    | 102 | 1020 | 108   | 0.154 | 8650  | 94   | 89 | 87 | 0.186± |        |    |   |
| 00 | -   | 6  | 8  | 2.0 | H18 | ol-3-O-β-   | onoi | o  | - | 2 | 3 | 3 | 9     | 7±0.0 | 30 | 10 | 10 | 50    | 6±0.0 |     | 000 | 0  | 30  | 000    | ±0.457 | 000 | 000  | 000   | 000   | 8±0.0 | 00   | 50 | 20 | 60     | 0.0718 | -  | - |

|             |                |      |     |    |                   |                                                                                                                                            |                    |                             |                            |                  |                  |                  |                      |                       |   |                |                |                |                |                       |                       |                  |                |               |                       |                  |                 |                 |                 |                       |                       |                       |          |          |                  |                  |                  |   |   |   |
|-------------|----------------|------|-----|----|-------------------|--------------------------------------------------------------------------------------------------------------------------------------------|--------------------|-----------------------------|----------------------------|------------------|------------------|------------------|----------------------|-----------------------|---|----------------|----------------|----------------|----------------|-----------------------|-----------------------|------------------|----------------|---------------|-----------------------|------------------|-----------------|-----------------|-----------------|-----------------------|-----------------------|-----------------------|----------|----------|------------------|------------------|------------------|---|---|---|
| 17 02       | H]-            | 1.07 | 5.4 | 8  | O12               | D-glucuroni<br>de                                                                                                                          | ds                 | D<br>e<br>e<br>p            | 0<br>0<br>0<br>0           | 6<br>0<br>0<br>0 | 6<br>0<br>0<br>0 | 2<br>0<br>0<br>0 | 068                  | 0                     | 0 | 0              | 0              | 116            | 0              | 9<br>0<br>0<br>0<br>0 | 00<br>0<br>0<br>0     | 0                | 1              |               | 0                     |                  | 0               | 388             |                 | 00                    | 00                    | 00                    |          |          |                  |                  |                  |   |   |   |
| kz 00 17 06 | [M<br>+H]<br>+ | 7.1  | 1.1 | 19 | C11<br>H16<br>O3  | Isololiolid<br>e                                                                                                                           | Oth<br>ers         | Bi<br>o<br>D<br>e<br>e<br>p | 38<br>27<br>4-<br>00<br>-9 | 5<br>2<br>0      | 6<br>4<br>0      | 6<br>3<br>0      | 6<br>4<br>0          | 0.010<br>4±0.0<br>109 |   | 51<br>60<br>0  | 54<br>60<br>0  | 52<br>40<br>0  | 49<br>50<br>0  | 0.014<br>1±0.0<br>077 | 152<br>00<br>0        | 2<br>4<br>0<br>0 | 13<br>80<br>0  | 112<br>00     | 0.0032<br>±0.004      | 992<br>00        | 984<br>00       | 9810<br>0       | 104<br>000      | 0.015<br>1±0.0<br>008 |                       | 25<br>40              | 24<br>30 | 25<br>40 | 0.0526<br>±0.027 |                  | -                | - |   |   |
| kz 00 17 10 | [M<br>+H]<br>+ | 2.9  | 2.1 | 22 | C15<br>H16<br>O2  | Stilboste<br>min B                                                                                                                         | Oth<br>ers         | Bi<br>o<br>D<br>e<br>e<br>p | 24<br>11<br>-<br>67<br>-8  | 1<br>3<br>5      | 1<br>5<br>8      | 1<br>2<br>7      | 1<br>3<br>0          | 0.002<br>3±0.0<br>022 |   | 96<br>90<br>0  | 66<br>00<br>0  | 11<br>00<br>0  | 88<br>00       | 0.002<br>4±0.0<br>048 | 610<br>0              | 5<br>4<br>3<br>0 | 73<br>10       | 481<br>0      | 0.0014<br>±0.002<br>6 | 495<br>0         | 531<br>0        | 7630            | 640<br>0        | 0.000<br>9±0.0<br>019 |                       | 48<br>60              | 61<br>70 | 62<br>10 | ±0.001<br>7      |                  | -                | - |   |   |
| kz 00 17 26 | [M<br>-<br>H]- | 1.4  | 7.3 | 81 | C42<br>H68<br>O15 | Prunellin<br>A                                                                                                                             | Oth<br>ers         | Bi<br>o<br>D<br>e<br>e<br>p | 4<br>3<br>5<br>0<br>0      | 4<br>6<br>8      | 3<br>8<br>8      | 4<br>0<br>0      | 0.007<br>±0.00<br>66 |                       |   | 22<br>10<br>0  | 23<br>50<br>0  | 30<br>50<br>0  | 31<br>90<br>0  | 0.007<br>3±0.0<br>123 | -                     | -                | -              | -             | -                     | -                | -               | -               | -               | -                     | -                     | -                     | -        | -        | -                | -                | -                | - | - |   |
| kz 00 17 39 | [M<br>+H]<br>+ | 6.7  | 3.0 | 61 | C28<br>H24<br>O16 | Quercetin<br>-3-O-(2''-<br>galloyl)-β-<br>D-<br>glucoside<br>Quercetin<br>-3-O-<br>(2'',3''-<br>digalloyl)-<br>β-D-<br>glucopyra<br>noside | Flav<br>onoi<br>ds | Bi<br>o<br>D<br>e<br>e<br>p | 9<br>1<br>9<br>1<br>1      | 1<br>0<br>0      | 3<br>0<br>0      | 3<br>0<br>0      | 0<br>0<br>0          | 0.167<br>4±0.1<br>563 |   |                | 35<br>00<br>0  | 33<br>50<br>00 | 33<br>30<br>00 | 35<br>20<br>00        | 0.092<br>7±0.0<br>254 | 147<br>00<br>0   | 6<br>6<br>0    | 12<br>90<br>0 | 580<br>0              | 0.003±<br>0.0116 | 196<br>000<br>0 | 196<br>000<br>0 | 2030<br>000     | 205<br>000<br>0       | 0.301<br>6±0.0<br>812 |                       | 30<br>70 | 18<br>00 | 13<br>70         | 0.0047<br>±0.017 |                  | - | - |   |
| kz 00 17 40 | [M<br>+H]<br>+ | 9.0  | 3.8 | 76 | C35<br>H28<br>O20 | Methyl<br>Brevifolin<br>carboxylat<br>e                                                                                                    | Flav<br>onoi<br>ds | Bi<br>o<br>D<br>e<br>e<br>p | 1<br>8<br>1<br>0<br>15     | 3<br>4<br>9      | 3<br>6<br>7      | 3<br>6<br>0      | 2<br>4<br>6          | 0.004<br>7±0.0<br>168 |   |                | 13<br>30<br>0  | 99<br>60       | 13<br>30<br>0  | 18<br>20<br>0         | 0.003<br>7±0.0<br>087 | -                | -              | -             | -                     | -                |                 | 203<br>00       | 258<br>00       | 3560<br>0             | 412<br>00             | 0.004<br>6±0.0<br>135 |          | 18<br>60 | 13<br>60         | 16<br>90         | 0.0033<br>±0.004 |   | - | - |
| kz 00 17 42 | [M<br>-<br>H]- | 5.0  | 3.0 | 30 | C14<br>H10<br>O8  | Methyl<br>Brevifolin<br>carboxylat<br>e                                                                                                    | Oth<br>ers         | Bi<br>o<br>D<br>e<br>e      | 47<br>02<br>-<br>76        | 3<br>5<br>0      | 2<br>2<br>0      | 3<br>1<br>0      | 9<br>5<br>0          | 0.321<br>8±0.7<br>929 |   | 60<br>40<br>00 | 53<br>30<br>00 | 40<br>60<br>00 | 58<br>40<br>00 | 0.143<br>9±0.2<br>445 | 392<br>000<br>0       | 1<br>1<br>0<br>0 | 28<br>10<br>00 | 350<br>000    | 0.0871<br>±0.14       | 323<br>000<br>0  | 323<br>000<br>0 | 2830<br>000     | 320<br>000<br>0 | 0.470<br>6±0.2<br>647 |                       | 32<br>60              | 34<br>10 | 31<br>10 | 0.7081<br>±0.690 |                  | -                | - |   |   |





[illegible]

[illegible]



[illegible]











[illegible]









[illegible]









|    |     |    |    |     |     |              |      |    |    |   |   |   |       |       |    |    |    |       |       |     |    |    |        |     |     |      |     |       |      |    |    |    |        |        |   |
|----|-----|----|----|-----|-----|--------------|------|----|----|---|---|---|-------|-------|----|----|----|-------|-------|-----|----|----|--------|-----|-----|------|-----|-------|------|----|----|----|--------|--------|---|
| 00 | +H] | 3  | 8  | 4.1 | H22 | ol-          | onoi | o  | 0  | 3 | 1 | 5 | 2±0.0 | 20    | 40 | 00 | 60 | 3±0.0 | 00    | 0   | 00 | 00 | ±0.011 | 00  | 00  | 0    | 00  | 7±0.0 | 0    | 80 | 00 | 40 | ±0.003 |        |   |
| 38 | +   | 5. | 7. | 0   | O14 | malonyl-     | ds   | D  | 1  | 5 | 0 | 8 | 149   | 0     | 0  | 0  | 0  | 055   |       | 7   | 0  |    | 2      |     |     |      | 037 |       | 0    | 0  |    | 7  |        |        |   |
| 11 |     | 1  | 0  |     |     | 3-O-         |      | e  | 0  | 0 | 0 | 0 |       |       |    |    |    |       |       | 0   |    |    |        |     |     |      |     |       |      |    |    |    |        |        |   |
|    |     | 1  | 6  |     |     | glucoside    |      | e  | 0  | 0 | 0 | 0 |       |       |    |    |    |       |       | 0   |    |    |        |     |     |      |     |       |      |    |    |    |        |        |   |
|    |     |    |    |     |     |              |      | p  |    |   |   |   |       |       |    |    |    |       |       |     |    |    |        |     |     |      |     |       |      |    |    |    |        |        |   |
|    |     |    |    |     |     |              |      | Bi |    |   |   |   |       |       |    |    |    |       |       |     |    |    |        |     |     |      |     |       |      |    |    |    |        |        |   |
|    |     | 5  | 3  |     |     |              |      | o  |    |   |   |   |       |       |    |    |    |       |       | 8   |    |    |        |     |     |      |     |       |      |    |    |    |        |        |   |
| kz |     | 6  | 1  |     |     | Isorhamn     |      | D  | 3  | 4 | 3 | 2 |       | 30    | 24 | 27 | 32 | 0.000 |       | 131 | 9  | 12 | 0.0026 |     |     |      |     |       |      |    |    |    |        |        |   |
| 00 | [M  | 5. | 7. | 56  | C25 | etin O-      | Flav | e  | 8  | 8 | 7 | 7 | 0.000 | 10    | 30 | 80 | 30 | 8±0.0 | 008   | 00  | 0  | 40 | ±0.005 | 766 | 723 | 6110 | 736 | 0.001 |      |    |    |    |        |        |   |
| 38 | +H] | 1  | 0  | 4.1 | H24 | malonylgl    | onoi | e  | 9  | 6 | 4 | 3 | 6±0.0 |       |    |    |    |       |       | 0   | 0  | 0  | 5      | 0   | 0   |      | 0   | 1±0.0 |      |    |    |    |        |        |   |
| 12 | +   | 2  | 8  | 1   | O15 | ucoside      | ds   | p  | -  | 0 | 0 | 0 | 0     | 017   |    |    |    |       |       |     |    |    |        |     |     |      |     |       | -    | -  | -  | -  | -      |        |   |
|    |     |    |    |     |     | Kaempfer     |      |    |    |   |   |   |       |       |    |    |    |       |       |     |    |    |        |     |     |      |     |       |      |    |    |    |        |        |   |
|    |     |    |    |     |     | ol 3-O-(6''- |      | Bi |    |   |   |   |       |       |    |    |    |       |       |     | 7  |    |        |     |     |      |     |       |      |    |    |    |        |        |   |
|    |     | 5  | 2  |     |     | trans-p-     |      | o  | 3  | 3 | 2 | 2 |       | 17    | 16 | 18 | 19 | 0.004 |       |     |    |    |        |     |     |      |     |       |      |    |    |    |        |        |   |
| kz |     | 9  | 8  |     |     | Coumaroy     |      | D  | 2  | 6 | 3 | 5 |       | 00    | 50 | 10 | 00 | 8±0.0 |       | 939 | 4  | 93 | 0.0212 | 211 | 188 | 2300 | 257 | 0.033 |      |    |    |    |        |        |   |
| 00 | [M  | 5. | 7. | 59  | C30 | l)-β-D-      | Flav | e  | 0  | 6 | 7 | 4 | 0.004 | 0     | 0  | 0  | 0  | 023   |       | 00  | 1  | 90 | ±0.021 | 000 | 000 | 00   | 000 | 3±0.0 |      |    | 34 | 49 | 28     | 0.0076 |   |
| 38 | +H] | 1  | 0  | 4.1 | H26 | glucopyra    | onoi | e  | 0  | 0 | 0 | 0 | 9±0.0 |       |    |    |    |       |       |     | 0  |    |        |     |     |      |     |       | 3550 | 00 | 10 | 30 | ±0.016 |        |   |
| 15 | +   | 4  | 5  | 4   | O13 | noside       | ds   | p  | -  | 0 | 0 | 0 | 0     | 119   |    |    |    |       |       |     |    |    |        |     |     |      |     |       | 0    | 0  | 0  | 0  | 2      | -      | - |
|    |     |    |    |     |     | Kampferol    |      | Bi | 16 | 1 | 1 | 1 | 1     |       |    |    |    |       |       |     |    |    |        |     |     |      |     |       |      |    |    |    |        |        |   |
|    |     | 6  | 2  |     |     | 3-O-(6''-    |      | o  | 95 | 4 | 8 | 9 | 3     |       |    |    |    |       |       |     |    |    |        |     |     |      |     |       |      |    |    |    |        |        |   |
| kz |     | 0  | 8  |     |     | galloyl)-β-  |      | D  | 65 | 4 | 1 | 3 | 9     | 65    | 59 | 55 | 52 | 0.015 |       | 126 | 9  | 10 | 0.0024 | 264 | 236 | 2400 | 322 | 0.039 |      |    |    |    |        |        |   |
| 00 | [M  | 1. | 7. | 60  | C28 | D-           | Flav | e  | -  | 0 | 0 | 0 | 0     | 0.027 | 0  | 20 | 90 | 10    | 8±0.0 | 00  | 9  | 30 | ±0.005 | 000 | 000 | 00   | 000 | 9±0.0 |      |    |    |    |        |        |   |
| 38 | +H] | 1  | 0  | 0.1 | H24 | galactopyr   | onoi | e  | 72 | 0 | 0 | 0 | 0     | 1±0.0 |    |    |    |       | 17    |     | 0  | 0  | 9      |     |     |      |     |       |      |    |    |    |        |        |   |
| 21 | +   | 2  | 6  | 1   | O15 | anoside      | ds   | p  | -4 | 0 | 0 | 0 | 0     | 501   |    |    |    |       |       |     |    |    |        |     |     |      |     |       | -    | -  | -  | -  | -      | -      |   |
|    |     |    |    |     |     | Kampferol    |      | Bi | 1  | 1 | 1 | 1 |       |       |    |    |    |       |       |     |    |    |        |     |     |      |     |       |      |    |    |    |        |        |   |
|    |     | 6  | 2  |     |     | 3-O-(2''-    |      | o  | 7  | 9 | 8 | 8 |       |       |    |    |    |       |       |     |    |    |        |     |     |      |     |       |      |    |    |    |        |        |   |
| kz |     | 0  | 8  |     |     | galloyl)-β-  |      | D  | 3  | 3 | 5 | 6 |       | 76    | 70 | 64 | 56 | 0.018 |       |     |    |    |        |     |     |      |     |       |      |    |    |    |        |        |   |
| 00 | [M  | 1. | 7. | 60  | C28 | D-           | Flav | e  | 0  | 0 | 0 | 0 | 0.030 | 10    | 20 | 50 | 00 | 1±0.0 |       |     |    |    |        | 241 | 243 | 2420 | 284 | 0.038 |      |    |    |    |        |        |   |
| 38 | +H] | 1  | 0  | 0.1 | H24 | galactopyr   | onoi | e  | 0  | 0 | 0 | 0 | 4±0.0 | 0     | 0  | 0  | 0  | 251   |       |     |    |    |        | 000 | 000 | 00   | 000 | ±0.02 |      |    |    |    |        |        |   |
| 23 | +   | 2  | 6  | 1   | O15 | anoside      | ds   | p  | -  | 0 | 0 | 0 | 0     | 03    |    |    |    |       |       | -   | -  | -  | -      | -   |     |      |     |       | -    | -  | -  | -  | -      | -      |   |
|    |     |    |    |     |     |              |      |    |    | 1 | 1 | 1 |       |       |    |    |    |       |       |     |    |    |        |     |     |      |     |       |      |    |    |    |        |        |   |
|    |     |    |    |     |     | Quercetin    |      | Bi | 9  | 0 | 0 | 1 |       |       |    |    |    |       |       |     | 1  |    |        |     |     |      |     |       |      |    |    |    |        |        |   |
|    |     | 6  | 3  |     |     | 3-O-(6''-    |      | o  | 4  | 5 | 1 | 8 |       | 36    | 38 | 35 | 33 | 0.097 |       | 863 | 3  | 15 | 0.0032 | 210 | 193 | 2000 | 210 | 0.306 |      |    |    |    |        |        |   |
| kz |     | 1  | 0  |     |     | galloyl)-β-  |      | D  | 7  | 0 | 0 | 0 |       | 10    | 90 | 80 | 80 | 9±0.0 |       | 0   | 9  | 90 | ±0.008 | 000 | 000 | 000  | 000 | 3±0.0 |      |    |    |    |        |        |   |
| 00 | [M  | 7. | 3. | 61  | C28 | D-           | Flav | e  | 0  | 0 | 0 | 0 | 0.172 | 00    | 00 | 00 | 00 | 723   |       |     | 0  | 0  | 1      | 0   | 0   | 000  | 0   | 866   |      |    | 22 | 26 | 16     | 0.0049 |   |
| 38 | +H] | 1  | 0  | 6.1 | H24 | galactopyr   | onoi | e  | 0  | 0 | 0 | 0 | 8±0.1 |       |    |    |    |       |       |     |    |    |        |     |     |      |     |       | 2820 | 30 | 40 | 60 | ±0.010 |        |   |
| 29 | +   | 1  | 5  | 1   | O16 | anoside      | ds   | p  | -  | 0 | 0 | 0 | 0     | 741   |    |    |    |       |       |     |    |    |        |     |     |      |     |       | 0    | 0  | 0  | 0  | 3      | -      | - |
|    |     | 7  | 3  |     |     | Quercetin    |      | Bi |    |   |   |   |       |       |    |    |    |       |       |     |    |    |        |     |     |      |     |       |      |    |    |    |        |        |   |
|    |     | 4  | 0  |     |     | -O-          |      | o  |    |   |   |   |       |       |    |    |    |       |       |     |    |    |        |     |     |      |     |       |      |    |    |    |        |        |   |
| kz |     | 3. | 3. | 74  | C32 | pentosyl-    | Flav | D  |    |   |   |   |       | 66    | 69 | 78 | 75 | 0.002 |       | 149 | 9  | 20 | 0.0032 |     |     |      |     |       |      |    |    |    |        |        |   |
| 00 | [M  | 2  | 0  | 2.2 | H38 | O-           | onoi | e  |    |   |   |   |       | 60    | 50 | 40 | 60 | ±0.00 | 13    | 00  | 6  | 10 | ±0.013 |     |     |      |     |       |      |    |    |    |        |        |   |
| 38 | +H] |    |    |     |     |              |      |    |    |   |   |   |       |       |    |    |    |       |       |     |    |    |        |     |     |      |     |       |      |    |    |    |        |        |   |
| 33 | +   | 0  | 5  | 0   | O20 | rhamnosi     | ds   | e  | -  | - | - | - | -     |       |    |    |    |       |       |     |    |    |        |     |     |      |     |       | 0    | 0  | 0  | 00 | 7      | -      | - |



|    |     |    |    |     |     |            |      |    |   |   |   |   |       |       |    |    |    |       |       |     |    |     |        |        |     |      |      |       |       |      |    |    |        |        |   |   |
|----|-----|----|----|-----|-----|------------|------|----|---|---|---|---|-------|-------|----|----|----|-------|-------|-----|----|-----|--------|--------|-----|------|------|-------|-------|------|----|----|--------|--------|---|---|
| 00 | +H] | 3  | 3  | 4.3 | H54 | hawthorn   | enoi | o  | 9 | 8 | 8 | 4 | 1±0.1 | 00    | 10 | 20 | 70 | 2±0.1 | 00    | 7   | 10 | 00  | ±0.025 | 000    | 000 | 000  | 000  | 9±0.3 | 00    | 00   | 30 | 10 | ±0.087 |        |   |   |
| 38 | +   | 5. | 5. | 9   | O7  | acid       | ds   | D  | 2 | 3 | 8 | 8 | 955   | 00    | 00 | 00 | 00 | 7     |       | 3   | 00 |     |        | 0      | 0   |      | 0    | 029   |       | 00   | 00 | 00 | 6      |        |   |   |
| 60 |     | 3  | 3  |     |     |            |      | e  | 0 | 0 | 0 | 0 |       |       |    |    |    |       |       | 0   |    |     |        |        |     |      |      |       |       |      |    |    |        |        |   |   |
|    |     | 9  | 2  |     |     |            |      | e  | 0 | 0 | 0 | 0 |       |       |    |    |    |       |       | 0   |    |     |        |        |     |      |      |       |       |      |    |    |        |        |   |   |
|    |     |    |    |     |     |            |      | p  | 0 | 0 | 0 | 0 |       |       |    |    |    |       |       |     |    |     |        |        |     |      |      |       |       |      |    |    |        |        |   |   |
|    |     |    |    |     |     |            |      | Bi |   |   |   |   |       |       |    |    |    |       |       |     |    |     |        |        |     |      |      |       |       |      |    |    |        |        |   |   |
|    |     | 6  | 4  |     |     |            |      | o  | 8 | 9 | 8 | 8 |       |       |    |    |    |       |       | 1   |    |     |        |        |     |      |      |       |       |      |    |    |        |        |   |   |
| kz |     | 6  | 0  |     |     | 3-O-Trans- |      | D  | 1 | 5 | 7 | 4 |       | 27    | 38 | 26 | 41 | 0.009 |       | 0   | 12 |     | 0.0031 | 420    | 478 | 4350 | 400  | 0.006 |       |      |    |    |        |        |   |   |
| 00 | [M  | 5. | 9. | 66  | C40 | feruloyl   | Terp | e  | 3 | 1 | 2 | 6 | 0.014 | 70    | 00 | 00 | 40 | ±0.02 | 137   | 6   | 80 | 139 | ±0.003 | 00     | 00  | 0    | 00   | 5±0.0 |       | 17   | 14 | 17 |        |        |   |   |
| 38 | +H] | 4  | 3  | 4.4 | H56 | euscaphic  | enoi | e  | 0 | 0 | 0 | 0 | 4±0.0 | 0     | 0  | 0  | 0  | 07    |       | 0   | 0  | 00  | 3      |        |     |      | 065  |       | 2050  | 40   | 20 | 10 | 0.0036 |        |   |   |
| 61 | +   | 0  | 0  | 0   | O8  | acid       | ds   | p  | - | 0 | 0 | 0 | 0     | 062   |    |    |    |       |       | 0   |    |     |        |        |     |      |      |       | 0     | 0    | 0  | 0  | ±0.006 | -      | - |   |
|    |     |    |    |     |     | 3β-        |      | Bi | 1 | 1 | 1 | 1 |       |       |    |    |    |       |       |     |    |     |        |        |     |      |      |       |       |      |    |    |        |        |   |   |
|    |     | 4  | 1  |     |     | Hydroxy-   |      | o  | 0 | 1 | 0 | 0 |       |       |    |    |    |       |       |     |    |     |        |        |     |      |      |       |       |      |    |    |        |        |   |   |
| kz |     | 0  | 8  |     |     | 28-        |      | D  | 1 | 7 | 3 | 5 |       | 22    | 27 | 26 | 28 | 0.070 |       |     |    |     |        |        |     |      |      |       |       |      |    |    |        |        |   |   |
| 00 | [M  | 9. | 7. | 40  | C29 | norurs-    | Terp | e  | 0 | 0 | 0 | 0 | 0.017 | 60    | 20 | 60 | 50 | 9±0.0 |       |     |    |     |        |        |     |      |      |       |       |      |    |    |        |        |   |   |
| 38 | +H] | 3  | 1  | 8.3 | H44 | 17,19,21-  | enoi | e  | 0 | 0 | 0 | 0 | 6±0.0 | 00    | 00 | 00 | 00 | 676   |       |     |    |     |        |        |     |      |      |       |       |      |    |    |        |        |   |   |
| 62 | +   | 5  | 5  | 4   | O   | trien      | ds   | p  | - | 0 | 0 | 0 | 0     | 081   |    |    |    |       |       | -   | -  | -   | -      | -      | -   | -    | -    | -     | -     | -    | -  | -  | -      | -      | - |   |
|    |     |    |    |     |     |            |      | Bi | 7 | 8 | 7 | 8 |       |       |    |    |    |       |       | 2   |    |     |        |        |     |      |      |       |       |      |    |    |        |        |   |   |
|    |     | 4  | 4  |     |     |            |      | o  | 7 | 7 | 3 | 8 |       | 11    | 11 | 10 | 12 |       |       | 3   |    |     |        |        |     |      |      |       |       |      |    |    |        |        |   |   |
| kz |     | 5  | 0  |     |     |            |      | D  | 6 | 1 | 7 | 3 |       | 30    | 30 | 90 | 80 | 0.313 |       | 223 | 6  | 23  | 238    | 0.0568 | 230 | 228  | 2300 | 238   | 0.349 |      | 13 | 13 | 12     |        |   |   |
| 00 | [M  | 5. | 9. | 45  | C30 |            | Terp | e  | 0 | 0 | 0 | 0 | 0.134 | 00    | 00 | 00 | 00 | 1±0.2 | 000   | 0   | 70 | 000 | ±0.024 | 000    | 000 | 000  | 000  | ±0.04 |       | 80   | 20 | 60 | 0.2781 |        |   |   |
| 38 | +H] | 3  | 3  | 4.3 | H46 | Sanguisor  | enoi | e  | 0 | 0 | 0 | 0 | 8±0.1 | 0     | 0  | 0  | 0  | 088   |       | 0   | 00 | 000 |        |        | 0   | 0    |      | 54    |       | 1390 | 00 | 00 | 00     | ±0.137 |   |   |
| 63 | +   | 5  | 5  | 4   | O3  | bigenin    | ds   | p  | - | 0 | 0 | 0 | 0     | 203   |    |    |    |       |       | 0   |    |     |        |        |     |      |      |       |       | 000  | 0  | 0  | 0      | 5      | - | - |
|    |     |    |    |     |     | Lup-12-    |      | Bi |   |   |   |   |       |       |    |    |    |       |       |     |    |     |        |        |     |      |      |       |       |      |    |    |        |        |   |   |
|    |     | 5  | 2  |     |     | en-        |      | o  | 3 | 3 | 2 | 3 |       | 10    | 95 | 96 | 97 | 0.026 |       |     |    |     |        |        |     |      |      |       |       |      |    |    |        |        |   |   |
| kz |     | 0  | 3  |     |     | 15α,19β-   |      | D  | 0 | 3 | 9 | 0 |       | 10    | 80 | 10 | 40 | 4±0.0 |       |     |    |     |        |        | 960 | 735  | 7860 | 911   | 0.001 |      |    |    |        |        |   |   |
| 00 | [M  | 1. | 3. | 50  | C30 | diol-3,11- | Terp | e  | 6 | 6 | 4 | 9 | 0.005 | 00    | 0  | 0  | 0  | 074   |       |     |    |     |        |        | 0   | 0    |      | 0     | 3±0.0 |      | 11 | 11 | 11     | 0.0238 |   |   |
| 38 | +H] | 3  | 1  | 0.3 | H44 | dioxo-28-  | enoi | e  | 0 | 0 | 0 | 0 | 1±0.0 | 00    | 0  | 0  | 0  |       |       |     |    |     |        |        |     |      |      | 014   |       | 1080 | 90 | 90 | 30     | ±0.007 |   |   |
| 72 | +   | 2  | 5  | 1   | O6  | oic acid   | ds   | p  | - | 0 | 0 | 0 | 0     | 027   |    |    |    |       |       | -   | -  | -   | -      | -      |     |      |      |       |       | 00   | 00 | 00 | 00     | 7      | - | - |
|    |     |    |    |     |     |            |      | Bi |   |   |   |   |       |       |    |    |    |       |       |     |    |     |        |        |     |      |      |       |       |      |    |    |        |        |   |   |
|    |     | 3  | 1  |     |     |            | Phe  | o  | 1 | 4 | 2 |   |       |       |    |    |    |       |       | 6   |    |     |        |        |     |      |      |       |       |      |    |    |        |        |   |   |
| kz |     | 4  | 8  |     |     |            | noli | D  | 8 | 3 | 4 | 8 |       | 91    | 20 | 34 | 11 | 0.003 |       | 248 | 1  | 80  | 0.0125 | 588    | 522 | 5620 | 582  | 0.008 |       |      |    |    |        |        |   |   |
| 00 | [M  | 3. | 1. | 34  | C15 | Dihydroca  | c    | e  | 7 | 0 | 3 | 4 | 0.003 | 20    | 70 | 10 | 80 | 1±0.0 | 00    | 0   | 70 | 374 | ±0.062 | 00     | 00  | 0    | 00   | 5±0.0 |       | 69   | 71 | 71 | 0.0144 |        |   |   |
| 39 | -   | 1  | 0  | 4.1 | H20 | ffeoylgluc | acid | e  | 0 | 0 | 0 | 1 | 9±0.0 |       |    |    |    | 2     |       |     | 0  |     | 1      |        |     |      | 037  |       | 6600  | 30   | 10 | 20 | ±0.005 |        |   |   |
| 46 | H]- | 0  | 5  | 1   | O9  | ose        | s    | p  | - | 0 | 0 | 0 | 0     | 281   |    |    |    |       |       |     |    |     |        |        |     |      |      |       |       | 0    | 0  | 0  | 0      | 2      | - | - |
|    |     |    |    |     |     |            |      | Bi | 8 | 8 | 7 | 7 |       |       |    |    |    |       |       |     |    |     |        |        |     |      |      |       |       |      |    |    |        |        |   |   |
|    |     | 2  |    |     |     |            |      | o  | 3 | 1 | 8 | 3 |       |       |    |    |    |       |       | 8   |    |     |        |        |     |      |      |       |       |      |    |    |        |        |   |   |
| kz |     | 2  | 9  |     |     |            |      | D  | 6 | 9 | 3 | 0 |       | 37    | 47 | 53 | 60 | 0.134 |       | 890 | 3  | 87  | 0.0212 | 193    | 194 | 2180 | 202  | 0.030 |       |      |    |    |        |        |   |   |
| 00 | [M  | 5. | 5. | 22  | C13 |            |      | e  | 0 | 0 | 0 | 0 | 0.131 | 00    | 00 | 00 | 00 | 1±0.2 | 00    | 0   | 70 | 888 | ±0.003 | 000    | 000 | 00   | 000  | 4±0.0 |       | 11   | 10 | 81 |        |        |   |   |
| 40 | +H] | 1  | 0  | 4.1 | H20 | Solatuber  | Oth  | e  | 0 | 0 | 0 | 0 | ±0.13 |       |    |    |    | 545   |       |     | 0  |     | 7      |        |     |      | 216  |       | 1290  | 60   | 30 | 00 | 0.0223 |        |   |   |
| 13 | +   | 5  | 8  | 4   | O3  | enol A     | ers  | p  | - | 0 | 0 | 0 | 0     | 18    |    |    |    |       |       |     |    |     |        |        |     |      |      |       |       | 00   | 00 | 00 | 0      | ±0.043 | - | - |
| kz | [M  | 3  | 1  | 32  | C15 | Cis-p-     | Oth  | Bi | - | 5 | 5 | 4 | 4     | 0.084 | 50 | 52 | 44 | 47    | 0.013 | 770 | 9  | 88  | 977    | 0.0215 | 283 | 298  | 2680 | 298   | 0.043 | 7410 | 94 | 95 | 10     | 0.0192 | - | - |



















|    |     |    |    |     |     |             |      |    |    |   |   |   |       |       |    |    |    |       |       |     |    |     |        |        |     |      |      |       |       |      |    |    |        |        |    |
|----|-----|----|----|-----|-----|-------------|------|----|----|---|---|---|-------|-------|----|----|----|-------|-------|-----|----|-----|--------|--------|-----|------|------|-------|-------|------|----|----|--------|--------|----|
| 51 | H]- | 9. | 7. | 2   | O11 |             | c    | D  | 8  | 7 | 3 | 3 | 719   | 00    | 00 | 00 | 00 | 763   |       | 2   | 00 |     |        | 0      | 0   |      | 0    | 99    |       | 00   | 0  | 0  | 7      |        |    |
| 86 |     | 1  | 0  |     |     |             | acid | e  | 0  | 0 | 0 | 0 |       |       |    |    |    |       |       | 0   |    |     |        |        |     |      |      |       |       |      |    |    |        |        |    |
|    |     | 1  | 6  |     |     |             | s    | e  | 0  | 0 | 0 | 0 |       |       |    |    |    |       |       | 0   |    |     |        |        |     |      |      |       |       |      |    |    |        |        |    |
|    |     |    |    |     |     |             |      | p  | 0  | 0 | 0 | 0 |       |       |    |    |    |       |       | 0   |    |     |        |        |     |      |      |       |       |      |    |    |        |        |    |
|    |     |    |    |     |     |             |      | Bi | 3  | 3 | 3 | 3 |       |       |    |    |    |       |       | 1   |    |     |        |        |     |      |      |       |       |      |    |    |        |        |    |
|    |     | 4  | 2  |     |     |             | Phe  | o  | 0  | 4 | 5 | 4 |       | 13    | 12 | 14 | 13 |       |       | 1   |    |     |        |        |     |      |      |       |       |      |    |    |        |        |    |
| kz |     | 4  | 8  |     |     |             | noli | D  | 7  | 3 | 0 | 2 |       | 50    | 80 | 10 | 90 | 0.367 |       | 1   | 96 |     |        |        |     |      |      |       |       |      |    |    |        |        |    |
| 00 | [M  | 9. | 7. | 45  | C21 |             | c    | e  | 0  | 0 | 0 | 0 | 0.055 | 00    | 00 | 00 | 00 | 1±0.0 | 112   | 2   | 50 | 113 | 0.0263 | 150    | 137 | 1560 | 154  | 0.225 |       |      |    |    |        |        |    |
| 51 | -   | 1  | 0  | 0.1 | H22 | Dunaliano   | acid | e  | 0  | 0 | 0 | 0 | 4±0.0 | 0     | 0  | 0  | 0  | 996   | 000   | 0   | 0  | 000 | 3      | 0      | 0   | 000  | 0    | ±0.12 |       | 49   | 39 | 39 |        |        |    |
| 87 | H]- | 1  | 6  | 2   | O11 | side B      | s    | p  | -  | 0 | 0 | 0 | 0     | 252   |    |    |    |       |       | 0   |    |     |        |        |     |      |      |       |       |      |    |    |        |        |    |
|    |     |    |    |     |     |             |      |    | 2  | 2 | 2 | 3 |       |       |    |    |    |       |       | 6   |    |     |        |        |     |      |      |       |       |      |    |    |        |        |    |
|    |     |    |    |     |     |             |      | Bi | 8  | 9 | 9 | 0 |       |       |    |    |    |       |       | 3   |    |     |        |        |     |      |      |       |       |      |    |    |        |        |    |
|    |     | 5  | 2  |     |     | Poncirin(Is | o    | 1  | 5  | 5 | 1 |   |       | 32    | 31 | 33 | 34 | 0.890 | 662   | 1   | 61 | 621 | 1.5387 | 187    | 183 | 1810 | 192  | 2.799 |       |      |    |    |        |        |    |
| kz |     | 9  | 8  |     |     | osakurane   | D    | 0  | 0  | 0 | 0 |   |       | 50    | 70 | 00 | 50 | 5±0.2 | 000   | 0   | 80 | 000 | ±0.368 | 000    | 000 | 0000 | 000  | 9±0.1 |       | 10   | 10 | 99 |        |        |    |
| 00 | [M  | 3. | 5. | 59  | C28 | tin-7-      | Flav | e  | 0  | 0 | 0 | 0 | 0.484 | 00    | 00 | 00 | 00 | 029   | 0     | 0   | 0  | 0   | 8      | 00     | 00  | 0000 | 00   | 837   |       | 20   | 50 | 10 | 2.1101 | C0     |    |
| 51 | -   | 1  | 0  | 4.1 | H34 | neohespe    | onoi | e  | 0  | 0 | 0 | 0 | ±0.15 | 0     | 0  | 0  | 0  |       |       | 0   |    |     |        |        |     |      |      |       |       |      |    |    |        |        |    |
| 98 | H]- | 9  | 0  | 9   | O14 | ridoside)   | ds   | p  | -  | 0 | 0 | 0 | 0     | 18    |    |    |    |       |       | 0   |    |     |        |        |     |      |      |       |       |      |    |    |        |        |    |
|    |     |    |    |     |     | Hespereti   |      | Bi | 3  | 3 | 3 | 3 |       |       |    |    |    |       |       | 5   |    |     |        |        |     |      |      |       |       |      |    |    |        |        |    |
|    |     | 6  | 3  |     |     | n 7-O-      | o    | 4  | 5  | 2 | 3 |   |       |       |    |    |    |       |       | 6   |    |     |        |        |     |      |      |       |       |      |    |    |        |        |    |
| kz |     | 0  | 0  |     |     | neohespe    | D    | 0  | 7  | 5 | 6 |   |       | 94    | 10 | 10 | 88 | 0.026 | 565   | 6   | 57 | 635 | 0.1425 | 106    | 104 | 1040 | 113  | 0.160 |       |      |    |    |        |        |    |
| 00 | [M  | 9. | 1. | 61  | C28 | ridoside(N  | Flav | e  | 0  | 0 | 0 | 0 | 0.056 | 60    | 20 | 40 | 10 | 3±0.0 | 000   | 0   | 80 | 000 | ±0.079 | 000    | 000 | 000  | 000  | 9±0.0 |       | 78   | 76 | 73 | 0.1604 | C0     |    |
| 52 | -   | 1  | 0  | 0.1 | H34 | eoheperi    | onoi | e  | 0  | 0 | 0 | 0 | 1±0.0 | 0     | 00 | 00 | 0  | 217   |       | 0   | 00 |     | 1      | 0      | 0   | 000  | 0    | 18    |       | 7980 | 80 | 20 | 80     | ±0.068 | 98 |
| 00 | H]- | 8  | 0  | 9   | O15 | din)        | ds   | p  | -  | 0 | 0 | 0 | 0     | 284   |    |    |    |       |       | 0   |    |     |        |        |     |      |      |       |       |      |    |    |        |        |    |
|    |     |    |    |     |     |             |      | Bi |    |   |   |   |       |       |    |    |    |       |       | 5   |    |     |        |        |     |      |      |       |       |      |    |    |        |        |    |
|    |     | 2  | 2  |     |     |             | o    | 3  | 4  | 3 | 3 |   |       |       |    |    |    |       |       | 2   |    |     |        |        |     |      |      |       |       |      |    |    |        |        |    |
| kz |     | 8  | 5  |     |     |             | D    | 9  | 2  | 8 | 8 |   |       | 16    | 17 | 16 | 18 | 0.004 | 576   | 2   | 57 |     |        |        |     |      |      |       |       |      |    |    |        |        |    |
| 00 | [M  | 7. | 9. | 28  | C15 |             | Flav | e  | 4  | 4 | 0 | 9 | 0.006 | 0     | 0  | 0  | 0  | 7±0.0 | 000   | 0   | 30 | 535 | 0.1341 | 206    | 196 | 2080 | 215  | 0.031 |       |      |    |    |        |        |    |
| 52 | -   | 0  | 0  | 8.0 | H12 | Dihydroka   | onoi | e  | 0  | 0 | 0 | 0 | 6±0.0 | 0     | 0  | 0  | 0  | 023   |       | 0   | 00 | 000 | ±0.058 | 000    | 000 | 00   | 000  | 1±0.0 |       | 19   | 20 | 20 | 0.0039 | C0     |    |
| 02 | H]- | 6  | 0  | 6   | O6  | empferol    | ds   | p  | -  | 0 | 0 | 0 | 0     | 033   |    |    |    |       |       | 0   |    |     |        |        |     |      |      |       |       |      |    |    |        |        |    |
|    |     |    |    |     |     |             |      | Bi |    |   |   |   |       |       |    |    |    |       |       | 2   |    |     |        |        |     |      |      |       |       |      |    |    |        |        |    |
|    |     | 3  | 3  |     |     |             | o    | 1  | 1  | 1 | 1 |   |       |       |    |    |    |       |       | 2   |    |     |        |        |     |      |      |       |       |      |    |    |        |        |    |
| kz |     | 4  | 1  |     |     | 5,7,8,4'-   | D    | 4  | 6  | 4 | 4 |   |       | 22    | 19 | 13 | 14 | 0.000 | 185   | 1   | 19 | 221 | 0.0005 | 246    | 266 | 2540 | 297  | 0.000 |       |      |    |    |        |        |    |
| 00 | [M  | 3. | 3. | 34  | C19 | Tetrameth   | Flav | e  | 0  | 6 | 7 | 9 | 0.002 | 70    | 10 | 00 | 20 | 5±0.0 | 0     | 6   | 60 | 0   | ±0.000 | 0      | 0   | 2540 | 0    | 4±0.0 |       |      |    |    |        |        |    |
| 52 | +H] | 1  | 0  | 2.1 | H18 | oxyflavon   | onoi | e  | 0  | 0 | 0 | 0 | 5±0.0 |       |    |    |    | 013   |       | 0   |    |     | 5      |        |     |      |      | 002   |       |      |    |    |        |        |    |
| 11 | +   | 2  | 8  | 1   | O6  | e           | ds   | p  | -  | 0 | 0 | 0 | 0     | 012   |    |    |    |       |       | 0   |    |     |        |        |     |      |      |       |       |      |    |    |        |        |    |
|    |     |    |    |     |     |             |      | Bi |    |   |   |   |       |       |    |    |    |       |       | 8   |    |     |        |        |     |      |      |       |       |      |    |    |        |        |    |
|    |     | 5  | 4  |     |     | Luteolin 7- | o    | 27 |    |   |   |   |       |       |    |    |    |       |       | 9   |    |     |        |        |     |      |      |       |       |      |    |    |        |        |    |
| kz |     | 9  | 4  |     |     | O-          | D    | 39 | 6  | 7 | 9 | 5 |       | 77    | 12 | 11 | 85 | 0.002 | 105   | 9   | 12 | 132 | 0.0271 | 110    | 126 | 1030 | 116  | 0.001 |       |      |    |    |        |        |    |
| 00 | [M  | 5. | 9. | 59  | C27 | neohespe    | Flav | e  | -  | 4 | 4 | 3 | 5     | 0.001 | 90 | 0  | 0  | 80    | 8±0.0 | 000 | 0  | 00  | ±0.043 | 00     | 00  | 0    | 00   | 7±0.0 |       | 20   | 25 | 19 | 0.0046 | C1     |    |
| 52 | +H] | 1  | 1  | 4.1 | H30 | ridoside(L  | onoi | e  | 72 | 7 | 7 | 6 | 7     | 2±0.0 |    |    |    |       | 065   |     | 0  |     | 8      |        |     |      |      | 015   |       | 2470 | 30 | 50 | 00     | ±0.006 | 26 |
| 25 | +   | 7  | 0  | 6   | O15 | onicerin)   | ds   | p  | -2 | 0 | 0 | 0 | 0     | 033   |    |    |    |       |       | 0   |    |     |        |        |     |      |      |       |       |      |    |    |        |        |    |
| kz | [M  | 6  | 4  | 60  | C28 | Neodiosm    | Flav | Bi | -  | 4 | 5 | 5 | 5     | 0.084 | 22 | 23 | 21 | 25    | 0.062 | 984 | 9  | 43  | 686    | 0.0018 | 574 | 220  | 2110 | 463   | 0.000 | 7450 | 62 | 67 | 59     | 0.0014 | -  |



**Table S2.** List of the differential metabolites (DEMs) compared between pairwise species based on OPLS-DA analysis.

|        |                                                            |                |       |         |        |                                                            |                |           |           |
|--------|------------------------------------------------------------|----------------|-------|---------|--------|------------------------------------------------------------|----------------|-----------|-----------|
| 83     |                                                            |                | 98    |         | 36     |                                                            | 45             |           |           |
| kz0000 |                                                            |                | 1.106 |         | kz0053 |                                                            | 1.080          |           |           |
| 55     | 3,4,5-Trimethoxycinnamic acid                              | Phenolic acids | 25    | 0.00173 | 77     | lyoniresinol-9'-O-β-D-xylopyranoside                       | Lignans        | 50        | 0.00012   |
| kz0005 |                                                            |                | 1.105 |         | kz0020 |                                                            | 1.080          |           |           |
| 96     | β-D-Furanofructosyl-α-D-(6-mustard acyl)glucoside          | Phenolic acids | 92    | 0.00174 | 63     | Galloyl-HHDP(Hexahydroxydiphenoyl)-glueopy ranose          | Phenolic acids | 49        | 0.00015   |
| kz0045 |                                                            |                | 1.105 |         | kz0037 |                                                            | 1.080          |           |           |
| 96     | Methyl neochebulagate                                      | Others         | 37    | 0.00204 | 17     | Maplexin C (2,3-Di-O-Galloyl-1,5-Anhydro-D-Glucitol)       | Phenolic acids | 23        | 0.00016   |
| kz0022 |                                                            |                | 1.106 |         | kz0031 |                                                            | 1.080          |           |           |
| 95     | (-)-Syringaresinol-4-O-β-D-monO-glucoside                  | Lignans        | 14    | 0.00232 | 03     | Gemin D                                                    | Phenolic acids | 48        | 0.00016   |
| kz0029 |                                                            |                | 1.105 |         | kz0005 |                                                            | 1.080          |           |           |
| 81     | Diosmetin-7-O-glucuronide                                  | Flavones       | 98    | 0.00240 | 32     | Protocatechuic acid-4-glucoside                            | Phenolic acids | 46        | 0.00016   |
| kz0045 |                                                            |                | 1.103 |         | kz0008 |                                                            | 1.080          | 1325.0000 |           |
| 95     | Geraniin                                                   | Phenolic acids | 26    | 0.00247 | 72     | Myricetin                                                  | Flavonols      | 52        | 0         |
| kz0031 |                                                            |                | 1.105 |         | kz0021 |                                                            | 1.080          |           |           |
| 04     | Nobotanin D                                                | Phenolic acids | 46    | 0.00309 | 44     | Angelicin                                                  | Coumarins      | 26        | 645.75000 |
| kz0017 |                                                            |                | 1.104 |         | kz0037 |                                                            | 1.080          |           |           |
| 50     | Tercatain                                                  | Phenolic acids | 14    | 0.00314 | 55     | Quercetin-3-sambubioside                                   | Flavonols      | 16        | 580.50000 |
| kz0029 |                                                            |                | 1.105 |         | kz0041 |                                                            | 1.080          |           |           |
| 75     | Acacetin-7-O-glucuronide                                   | Flavones       | 78    | 0.00374 | 72     | Quercetin 3-O-β-D-xylopyranosyl(1→2)-β-D-galactopyranoside | Flavonols      | 49        | 518.25000 |
| kz0013 |                                                            |                | 1.104 |         | kz0005 |                                                            | 1.080          |           |           |
| 07     | Phthalic acid                                              | Organic acids  | 19    | 0.00388 | 17     | Sinapyl alcohol                                            | Phenolic acids | 18        | 483.50000 |
| kz0005 |                                                            |                | 1.105 |         | kz0012 |                                                            | 1.079          |           |           |
| 75     | 3,5-Di-O-galloylshikimic acid                              | Phenolic acids | 31    | 0.00414 | 84     | Oxaloacetic acid                                           | Organic acids  | 48        | 372.75000 |
| kz0035 |                                                            |                | 1.103 |         | kz0018 |                                                            | 1.079          |           |           |
| 04     | Geraniinic acid C                                          | Phenolic acids | 04    | 0.00446 | 64     | vnilloylcaffeoyltartaric acid                              | Phenolic acids | 82        | 263.00000 |
| kz0037 |                                                            |                | 1.105 |         | kz0033 |                                                            | 1.079          |           |           |
| 97     | 3-Prenyl-4-O-β-D-glucopyranosyloxy-4-hydroxyl-benzoic acid | Phenolic acids | 09    | 0.00506 | 62     | Tubuloside C                                               | Phenolic acids | 98        | 174.42778 |
| kz0008 |                                                            |                | 1.102 |         | kz0038 |                                                            | 1.074          |           |           |
| 86     | Myricetin-3-O-α-L-arabinopyranoside                        | Flavonols      | 58    | 0.00598 | 33     | Quercetin-O-pentosyl-O-rhamnoside-O-glucoside              | Flavonols      | 73        | 133.65000 |
| kz0005 |                                                            |                | 1.105 |         | kz0002 |                                                            | 1.079          |           |           |
| 02     | Coniferaldehyde                                            | Phenolic acids | 55    | 0.00666 | 78     | Indole 3-acetic acid (IAA)                                 | Alkaloids      | 48        | 127.50000 |
| kz0009 |                                                            |                | 1.104 |         | kz0010 |                                                            | 1.077          |           |           |
| 20     | Quercetin-O-rutinoside-hexose                              | Flavonols      | 06    | 0.01014 | 14     | 1-Methylhistamine                                          | Others         | 50        | 109.82500 |
| kz0016 |                                                            |                | 1.106 |         | kz0031 |                                                            | 1.075          |           |           |
| 84     | Tetramethyluteolin (3',4',5,7-Tetramethoxyflavone)         | Flavones       | 20    | 0.01259 | 66     | 6-Hydroxy-7-methoxycoumarin                                | Coumarins      | 82        | 65.23669  |
| kz0005 |                                                            |                | 1.105 |         | kz0007 |                                                            | 1.079          |           |           |
| 36     | 5-O-Galloylshikimic acid                                   | Phenolic acids | 55    | 0.02368 | 97     | Tetahydroxy-flavone-7-O-β-D-glucuronide                    | Flavones       | 11        | 58.75706  |
| kz0005 |                                                            |                | 1.104 |         | kz0017 |                                                            | 1.080          |           |           |
| 37     | 3-O-Galloylshikimic acid                                   | Phenolic acids | 49    | 0.02590 | 02     | Kaempferol-3-O-β-D-glucuronide                             | Flavonols      | 18        | 51.27709  |
| kz0005 |                                                            |                | 1.105 |         | kz0007 |                                                            | 1.079          |           |           |
| 05     | Coniferyl alcohol                                          | Phenolic acids | 74    | 0.02829 | 98     | Luteolin-7-O-glucuronide                                   | Flavones       | 88        | 43.19751  |
| kz0031 | Clemaphenol A                                              | Lignans        | 1.096 | 0.03618 | kz0029 | Scutellarin(Scutellarein-7-O-glucuronide)                  | Flavones       | 1.079     | 43.04054  |



|        |                                                      |                |       |         |        |                                                               |                |       |          |
|--------|------------------------------------------------------|----------------|-------|---------|--------|---------------------------------------------------------------|----------------|-------|----------|
| 47     |                                                      |                | 78    |         | 76     |                                                               | 34             |       |          |
| kz0010 |                                                      |                | 1.101 |         | kz0030 |                                                               | 1.077          |       |          |
| 76     | Ethyl gallate                                        | Phenolic acids | 39    | 0.03892 | 98     | 3-O-Digalloyl quinic acid                                     | Phenolic acids | 59    | 35.59633 |
| kz0010 |                                                      |                | 1.100 |         | kz0009 |                                                               | 1.080          |       |          |
| 74     | Gallic acid                                          | Phenolic acids | 48    | 0.07032 | 06     | Kaempferol-3-O-robinobioside(Biorobin)                        | Flavonols      | 34    | 29.82635 |
| kz0005 |                                                      |                | 1.105 |         | kz0013 |                                                               | 1.067          |       |          |
| 77     | Hexahydroxydiphenylglucose                           | Phenolic acids | 29    | 0.08116 | 80     | Quercetin-O-rutinoside-O-rhamnoside                           | Flavonols      | 34    | 29.42529 |
| kz0020 |                                                      |                | 1.093 |         | kz0009 |                                                               | 1.080          |       |          |
| 63     | Galloyl-HHDP(Hexahydroxydiphenyl)-glucose            | Phenolic acids | 72    | 0.08921 | 05     | Kaempferol-3-O-rutinoside(Nicotiflorin)                       | Flavonols      | 34    | 28.62360 |
| kz0031 |                                                      |                | 1.092 |         | kz0038 |                                                               | 1.080          |       |          |
| 03     | Gemin D                                              | Phenolic acids | 89    | 0.09405 | 50     | (-)-secoisolaricresinol 4-O-β-D-glucopyranoside               | Lignans        | 09    | 28.31001 |
| kz0040 |                                                      |                | 1.104 |         | kz0036 |                                                               | 1.074          |       |          |
| 15     | Cis-p-coumaric acid 4-O-glucoside                    | Others         | 95    | 0.09540 | 93     | Quercetin-3-O-(2-O-α-L-rhamnopyranosyl)-β-D-galactopyranoside | Flavonols      | 51    | 22.94023 |
| kz0025 |                                                      |                | 1.102 |         | kz0041 |                                                               | 1.077          |       |          |
| 48     | p-Coumaric acid-O-glycoside                          | Phenolic acids | 14    | 0.09823 | 71     | Kaempferol 3-O-β-D-neohesperidoside                           | Flavonols      | 11    | 22.46246 |
| km053  |                                                      |                | 1.094 |         | kz0047 |                                                               | 1.079          |       |          |
| 2      | Delphinidin 3-glucoside (Mirtillin)                  | Anthocyanins   | 39    | 0.09850 | 03     | secoisolaricresinol 9-O-β-D-glucopyranoside                   | Lignans        | 58    | 22.30068 |
| kz0037 |                                                      |                | 1.100 |         | kz0029 |                                                               | 1.073          |       |          |
| 48     | 7'-O-Sinapoyljasminoside L                           | Terpenoids     | 89    | 0.10582 | 90     | Luteolin-7-O-rutinoside                                       | Flavones       | 96    | 18.86159 |
| kz0005 |                                                      |                | 1.092 |         | kz0009 |                                                               | 1.064          |       |          |
| 07     | Syringic Aldehyde                                    | Phenolic acids | 22    | 0.11032 | 07     | Kaempferol-3-O-glucoside-7-O-rhamnoside                       | Flavonols      | 98    | 16.07401 |
| kz0052 |                                                      |                | 1.093 |         | kz0052 |                                                               | 1.072          |       |          |
| 11     | 5,7,8,4'-Tetramethoxyflavone                         | Flavones       | 68    | 0.11462 | 25     | Luteolin 7-O-neohesperidoside(Lonicerin)                      | Flavones       | 51    | 15.46588 |
| kz0009 |                                                      |                | 1.105 |         | kz0025 |                                                               | 1.061          |       |          |
| 15     | 6-Hydroxykaempferol-7,6-O-Diglucoside                | Flavonols      | 26    | 0.11748 | 60     | 6-O-feruloyl-α-glucose                                        | Phenolic acids | 01    | 14.36250 |
| kz0013 |                                                      |                | 1.099 |         | kz0005 |                                                               | 1.079          |       |          |
| 12     | Shikimic acid                                        | Organic acids  | 24    | 0.12020 | 05     | Coniferyl alcohol                                             | Phenolic acids | 73    | 14.20085 |
| kz0031 |                                                      |                | 1.095 |         | kz0052 |                                                               | 1.080          |       |          |
| 06     | Cuspinin                                             | Phenolic acids | 99    | 0.12741 | 02     | Dihydrokaempferol                                             | Flavanols      | 01    | 13.90044 |
| kz0037 |                                                      |                | 1.097 |         | kz0031 |                                                               | 1.078          |       |          |
| 16     | 2,4-Di-O-Galloyl-1,5-Anhydro-D-Glucitol;(Maplexin D) | Phenolic acids | 41    | 0.13066 | 51     | Ailantinal E                                                  | Others         | 81    | 13.51201 |
| kz0000 |                                                      |                | 1.092 |         | kz0038 |                                                               | 1.072          |       |          |
| 52     | Ethyl 3,4-Dihydroxybenzoate (Ethyl protocatechuate)  | Phenolic acids | 67    | 0.13488 | 09     | Sieboldin                                                     | Chalcones      | 36    | 12.44489 |
| kz0007 |                                                      |                | 1.098 |         | kz0009 |                                                               | 1.079          |       |          |
| 03     | Delphinidin-3-O-glucoside (Mirtillin)                | Anthocyanins   | 65    | 0.13499 | 12     | Isorhamnetin-3-O-rutinoside (Narcissin)                       | Flavonols      | 81    | 11.63443 |
| kz0004 |                                                      |                | 1.104 |         | kz0037 |                                                               | 1.073          |       |          |
| 91     | p-Coumaric acid                                      | Phenolic acids | 64    | 0.14848 | 97     | 3-Prenyl-4-O-β-D-glucopyranosyloxy-4-hydroxyl-benzoic acid    | Phenolic acids | 60    | 11.37975 |
| kz0005 |                                                      |                | 1.074 |         | kz0005 |                                                               | 1.070          |       |          |
| 30     | Brevifolin carboxylic acid                           | Phenolic acids | 20    | 0.15421 | 92     | Rosmarinyl Glucoside                                          | Phenolic acids | 59    | 11.18904 |
| kz0025 |                                                      |                | 1.088 |         | kz0011 |                                                               | 1.072          |       |          |
| 54     | p-Hydroxycinnamic acid                               | Phenolic acids | 99    | 0.15795 | 13     | Lumichrome                                                    | Alkaloids      | 57    | 11.05833 |
| kz0000 | 2-(Formylamino)benzoic acid                          | Phenolic acids | 1.103 | 0.15923 | kz0027 | Sexangularetin 3-glucoside-7-rhamnoside                       | Flavonols      | 1.067 | 11.04457 |

|        |                                                                               |                |       |         |        |                                                     |                |       |          |
|--------|-------------------------------------------------------------------------------|----------------|-------|---------|--------|-----------------------------------------------------|----------------|-------|----------|
| 49     |                                                                               |                | 33    |         | 88     |                                                     | 65             |       |          |
| kz0030 |                                                                               |                | 1.078 |         | kz0007 |                                                     | 1.078          |       |          |
| 98     | 3-O-Digalloyl quinic acid                                                     | Phenolic acids | 03    | 0.16514 | 91     | Apigenin 7-O-glucoside(Cosmosiin)                   | Flavones       | 83    | 10.39837 |
| kz0000 |                                                                               |                | 1.064 |         | kz0021 |                                                     |                | 1.072 |          |
| 66     | Feruloyl syringic acid                                                        | Phenolic acids | 16    | 0.16592 | 96     | 2'-Hydoxy,5-methoxy Genistein-O-rhamnosyl-glucoside | Isoflavones    | 41    | 9.87071  |
| kz0037 |                                                                               |                | 1.099 |         | kz0007 |                                                     |                | 1.076 |          |
| 19     | Methyl 4,6-di-O-galloyl-D-glucoside                                           | Phenolic acids | 86    | 0.16675 | 92     | Apigenin 5-O-glucoside                              | Flavones       | 29    | 9.69072  |
| kz0008 |                                                                               |                | 1.102 |         | km060  |                                                     |                | 1.073 |          |
| 41     | Luteolin-O-sinapoylhexoside                                                   | Flavones       | 36    | 0.16868 | 2      | Genistein 7-O-Glucoside (Genistin)                  | Isoflavones    | 55    | 9.38185  |
| kz0005 |                                                                               |                | 1.098 |         | kz0050 |                                                     |                | 1.074 |          |
| 04     | Caffeic acid                                                                  | Phenolic acids | 85    | 0.17278 | 55     | Galangin-7-glucoside                                | Flavones       | 58    | 9.24528  |
| kz0053 |                                                                               |                | 1.103 |         | kz0009 |                                                     |                | 1.077 |          |
| 70     | (+)-Isolariciresinol                                                          | Lignans        | 68    | 0.17797 | 08     | Quercetin-3-O-robinobioside                         | Flavonols      | 96    | 8.35443  |
| kz0037 |                                                                               |                | 1.092 |         | kz0001 |                                                     |                | 1.078 |          |
| 17     | Maplexin C (2,3-Di-O-Galloyl-1,5-Anhydro-D-Glucitol)                          | Phenolic acids | 11    | 0.17833 | 90     | Arbutin                                             | Others         | 08    | 8.18991  |
| kz0046 | 7S,8R-threo-3',9,9'-trihydroxy-3-methoxy-4',7-epoxy-neolignan-4-O- $\alpha$ - |                | 1.099 |         | kz0016 |                                                     |                | 1.079 |          |
| 98     | L-rhamnopyranoside                                                            | Lignans        | 77    | 0.18070 | 37     | Oresbusin A                                         | Phenolic acids | 12    | 8.00731  |
| kz0010 |                                                                               |                | 1.103 |         | kz0009 |                                                     |                | 1.078 |          |
| 75     | Methyl gallate                                                                | Phenolic acids | 24    | 0.18342 | 09     | Quercetin-3-O-rutinoside (Rutin)                    | Flavonols      | 64    | 7.66157  |
| kz0009 |                                                                               |                | 1.094 |         | kz0005 |                                                     |                | 1.080 |          |
| 14     | 6-Hydroxykaempferol-3,6-O-Diglucoside                                         | Flavonols      | 35    | 0.18419 | 57     | Glucosyringic Acid                                  | Phenolic acids | 25    | 7.63619  |
| kz0047 |                                                                               |                | 1.102 |         | kz0026 |                                                     |                | 1.078 |          |
| 38     | 4,7,9,9'-Tetrahydroxy-3,3'-dimethoxy-8-O-4'-neolignan                         | Others         | 28    | 0.18652 | 04     | Kaempferol-3-O-(6''-acetyl)-glucoside               | Flavonols      | 37    | 7.05004  |
| kz0026 |                                                                               |                | 1.098 |         | kz0041 |                                                     |                | 1.073 |          |
| 78     | Quercetin-3-O-(6''-O-acetyl)-galactoside                                      | Flavonols      | 20    | 0.19369 | 73     | Quercetin 3-O-neohesperidoside                      | Flavonols      | 90    | 6.88296  |
| kz0009 |                                                                               |                | 1.104 |         | kz0011 |                                                     |                | 1.077 |          |
| 95     | Syringaresinol                                                                | Lignans        | 26    | 0.19482 | 58     | D-Pantothenic Acid                                  | Vitamins       | 73    | 6.43132  |
| kz0004 |                                                                               |                | 1.087 |         | kz0009 |                                                     |                | 1.077 |          |
| 84     | Vanillin                                                                      | Phenolic acids | 64    | 0.20000 | 11     | Quercetin-7-O-rutinoside                            | Flavonols      | 55    | 6.37064  |
| km111  |                                                                               |                | 1.095 |         | kz0005 |                                                     |                | 1.079 |          |
| 3      | 5-O-p-Coumaroyl shikimic acid                                                 | Phenolic acids | 34    | 0.20752 | 40     | 3,4,5-Trimethoxyphenyl- $\beta$ -D-Glucopyranoside  | Phenolic acids | 71    | 5.98788  |
| kz0020 |                                                                               |                | 1.098 |         | kz0022 |                                                     |                | 1.071 |          |
| 08     | 3,5,7,4'--Tetrahydroxy-Coumaronochromone                                      | Others         | 32    | 0.20808 | 95     | Syringaresinol-4'-O- $\beta$ -D-monO-glucoside      | Lignans        | 96    | 5.97214  |
| kz0008 |                                                                               |                | 1.100 |         | kz0025 |                                                     |                | 1.077 |          |
| 64     | Kaempferol                                                                    | Flavonols      | 31    | 0.21028 | 46     | Isosalicylic acid O-glycoside                       | Phenolic acids | 69    | 5.56543  |
| kz0007 |                                                                               |                | 1.085 |         | kz0040 |                                                     |                | 1.065 |          |
| 00     | Cyanidin-3-O-glucoside (Kuromanin)                                            | Anthocyanins   | 45    | 0.21412 | 35     | 3-Indoleacrylic acid                                | Alkaloids      | 07    | 5.52196  |
| kz0053 |                                                                               |                | 1.090 |         | kz0037 |                                                     |                | 1.067 |          |
| 76     | 5'-methoxysolariciresinol-9'-O- $\beta$ -D-xylopyranoside                     | Lignans        | 68    | 0.21692 | 94     | Syringic Aldehyde-glucoside                         | Phenolic acids | 16    | 5.13809  |
| kz0051 |                                                                               |                | 1.095 |         | kz0025 |                                                     |                | 1.075 |          |
| 37     | Isoscopoletin                                                                 | Coumarins      | 04    | 0.22403 | 56     | 4-O-glucosyl-4-hydroxybenzoic acid                  | Phenolic acids | 43    | 5.01519  |
| kz0046 | 5,7,3',4',5'-pentahydroxydihydroflavone                                       | Flavanones     | 1.090 | 0.22663 | kz0002 | Citramalate                                         | Organic acids  | 1.074 | 4.71366  |

|        |                                                   |                |       |         |        |                                                            |                   |       |         |
|--------|---------------------------------------------------|----------------|-------|---------|--------|------------------------------------------------------------|-------------------|-------|---------|
| 65     |                                                   |                | 71    |         | 96     |                                                            | 03                |       |         |
| kz0037 |                                                   |                | 1.104 |         | kz0005 |                                                            | 1.070             |       |         |
| 14     | 6-O-Galloylglucose                                | Phenolic acids | 43    | 0.23063 | 02     | Coniferaldehyde                                            | Phenolic acids    | 93    | 4.65391 |
| kz0034 |                                                   |                | 1.105 |         | kz0004 |                                                            | 1.078             |       |         |
| 97     | 3-O-Galloyl-β-D-glucose                           | Phenolic acids | 90    | 0.23135 | 12     | Aucubin                                                    | Terpenoids        | 14    | 4.57824 |
| kz0031 |                                                   |                | 1.105 |         | kz0024 |                                                            | 1.058             |       |         |
| 00     | 5-O-Galloylhamamelose                             | Phenolic acids | 20    | 0.23149 | 85     | 3-methoxy-juglone                                          | Quinones          | 75    | 4.44034 |
| kz0006 |                                                   |                | 1.066 |         | kz0035 |                                                            | 1.064             |       |         |
| 98     | Cyanidin-3-O-galactoside                          | Anthocyanins   | 56    | 0.23273 | 17     | Glucosyloxybenzoic acid                                    | Phenolic acids    | 19    | 4.19065 |
| kz0004 |                                                   |                | 1.104 |         | kz0005 |                                                            | 1.075             |       |         |
| 24     | Eriodictyol                                       | Flavanones     | 14    | 0.23327 | 33     | 2,5-Dihydroxy benzoic acid O-hexside                       | Phenolic acids    | 60    | 4.04869 |
| kz0005 |                                                   |                | 1.102 |         | kz0011 |                                                            | 1.077             |       |         |
| 73     | p-Coumaroylferuloyltartaric acid                  | Phenolic acids | 89    | 0.23624 | 63     | Riboflavin                                                 | Vitamins          | 40    | 3.97904 |
| kz0000 |                                                   |                | 1.101 |         | kz0004 |                                                            | 1.075             |       |         |
| 40     | N,N'-Bis(Sinapoyl)Spermidine                      | Alkaloids      | 80    | 0.23754 | 66     | 4-Hydroxybenzaldehyde                                      | Phenolic acids    | 08    | 3.93175 |
| kz0009 |                                                   |                | 1.104 |         | kz0009 |                                                            | 1.076             |       |         |
| 92     | Pinoresinol                                       | Lignans        | 40    | 0.23880 | 73     | Epigallocatechin (EGC)                                     | Flavanols         | 12    | 3.60094 |
| kz0022 |                                                   |                | 1.104 |         | kz0009 |                                                            | 1.068             |       |         |
| 19     | Epipinoresinol                                    | Lignans        | 44    | 0.24796 | 74     | Gallocatechin                                              | Flavanols         | 22    | 3.36138 |
| kz0008 |                                                   |                | 1.103 |         | kz0038 |                                                            | 1.046             |       |         |
| 92     | 6-Hydroxykaempferol-7-O-glucoside                 | Flavonols      | 95    | 0.24889 | 15     | Kaempferol 3-O-(6''-trans-p-Coumaroyl)-β-D-glucopyranoside | Flavonols         | 55    | 2.96432 |
| kz0047 |                                                   |                | 1.056 |         | kz0034 |                                                            | 1.076             |       |         |
| 03     | secoisolariciresinol 9-O-β-D-glucopyranoside      | Lignans        | 03    | 0.24954 | 98     | 2-O-Galloyl-β-D-glucose                                    | Phenolic acids    | 91    | 2.94830 |
| kz0015 |                                                   |                | 1.065 |         | kz0010 |                                                            | 1.076             |       |         |
| 84     | Quercetin-3',4'-dimethyl ether                    | Flavonols      | 24    | 0.25600 | 20     | 4-Methyl-5-thiazoleethanol                                 | Others            | 97    | 2.94695 |
| kz0022 |                                                   |                | 1.105 |         | kz0013 |                                                            | 1.075             |       |         |
| 14     | isohyperoside                                     | Flavonols      | 19    | 0.25660 | 40     | Procyanidin C2                                             | Proanthocyanidins | 47    | 2.91212 |
| kz0011 |                                                   |                | 1.095 |         | kz0005 |                                                            | 1.075             |       |         |
| 75     | Esculetin                                         | Coumarins      | 71    | 0.25774 | 42     | 1-O-Galloyl-β-D-glucose                                    | Phenolic acids    | 49    | 2.86242 |
| kz0031 |                                                   |                | 1.097 |         | kz0038 |                                                            | 1.009             |       |         |
| 08     | mlyricetin 3-O-B-D-glucopyranoside                | Flavonols      | 46    | 0.25832 | 12     | Isorhamnetin O-malonylglucoside                            | Flavonols         | 20    | 2.81997 |
| kz0004 |                                                   |                | 1.102 |         | kz0026 |                                                            | 1.075             |       |         |
| 96     | Vanillic acid                                     | Phenolic acids | 79    | 0.25852 | 78     | Quercetin-3-O-(6''-O-acetyl)-galactoside                   | Flavonols         | 90    | 2.61980 |
| km007  |                                                   |                | 1.103 |         | kz0000 |                                                            | 1.071             |       |         |
| 1      | Quercetin 3-O-galactoside (Hyperin)               | Flavonols      | 60    | 0.25922 | 66     | Feruloyl syringic acid                                     | Phenolic acids    | 87    | 2.58701 |
| kz0006 |                                                   |                | 1.086 |         | kz0005 |                                                            | 1.022             |       |         |
| 13     | 1,2,3,6-Tetra-O-Galloyl-β-D-Glucose               | Phenolic acids | 41    | 0.26009 | 00     | Riboprine                                                  | Phenolic acids    | 73    | 2.53374 |
| kz0005 |                                                   |                | 1.015 |         | kz0025 |                                                            | 1.060             |       |         |
| 52     | 4-O-Caffeoyl quinic acid (criptochlorogenic acid) | Phenolic acids | 31    | 0.26067 | 52     | Sinapic acid-glycoside                                     | Phenolic acids    | 92    | 2.51813 |
| km022  |                                                   |                | 1.102 |         | km054  |                                                            | 1.079             |       |         |
| 8      | Quercetin 3-O-glucoside (Isotrifoliin)            | Flavonols      | 75    | 0.26863 | 8      | Dihydroquercetin (Taxifolin)                               | Flavonols         | 10    | 2.47179 |
| km081  | Morin                                             | Flavonols      | 1.105 | 0.26893 | kz0011 | Esculin(6,7-DihydroxyCoumarin-6-glucoside)                 | Coumarins         | 1.023 | 2.40571 |

|        |                                                |                |       |         |        |                                                     |                |       |         |
|--------|------------------------------------------------|----------------|-------|---------|--------|-----------------------------------------------------|----------------|-------|---------|
| 4      |                                                |                | 68    |         | 88     |                                                     | 08             |       |         |
| km032  |                                                |                | 1.100 |         | kz0000 |                                                     | 1.078          |       |         |
| 9      | 3-(4-Hydroxyphenyl)propionic acid              | Phenolic acids | 13    | 0.26950 | 56     | Salicylic acid glucoside                            | Phenolic acids | 10    | 2.35668 |
| kz0004 |                                                |                | 1.099 |         | kz0028 |                                                     | 1.077          |       |         |
| 95     | 3-(4-Hydroxyphenyl)-propionic acid             | Phenolic acids | 66    | 0.26953 | 62     | Dihydrosedinine                                     | Alkaloids      | 36    | 2.26505 |
| kz0017 |                                                |                | 1.063 |         | km143  |                                                     | 1.047          |       |         |
| 42     | Methyl Brevifolincarboxylate                   | Others         | 41    | 0.27165 | 7      | p-Aminobenzoate                                     | Phenolic acids | 33    | 2.22180 |
| kz0025 |                                                |                | 1.098 |         | kz0002 |                                                     | 1.070          |       |         |
| 57     | 4-O-glucosyl-3,4-dihydroxybenzyl alcohol       | Phenolic acids | 66    | 0.27574 | 40     | Trans-Zeatin-9-N-Glucoside                          | Alkaloids      | 23    | 2.21678 |
| kz0012 |                                                |                | 1.104 |         | kz0053 |                                                     | 1.060          |       |         |
| 81     | Citraconic acid                                | Organic acids  | 70    | 0.27993 | 78     | 5'-methoxyisolariciresinol-9'-O-β-D-glucopyranoside | Lignans        | 73    | 2.17773 |
| km081  |                                                |                | 1.084 |         | kz0009 |                                                     | 1.068          |       |         |
| 8      | Myricetin 3-O-rhamnoside (Myricitrin)          | Flavonols      | 93    | 0.28405 | 04     | Tiliroside                                          | Flavonols      | 81    | 2.16624 |
| kz0000 |                                                |                | 1.102 |         | kz0051 |                                                     | 1.078          |       |         |
| 53     | Isoferulic Acid                                | Phenolic acids | 24    | 0.28487 | 98     | Poncirin(Isosakuranetin-7-neohesperidoside)         | Flavanones     | 10    | 2.16041 |
| kz0030 |                                                |                | 1.103 |         | kz0011 |                                                     | 1.053          |       |         |
| 99     | Di-O-Glucose-quinic acid                       | Phenolic acids | 96    | 0.28567 | 99     | Indole-3-carboxaldehyde                             | Alkaloids      | 60    | 2.14719 |
| kz0052 |                                                |                | 1.102 |         | kz0013 |                                                     | 1.048          |       |         |
| 00     | Hesperetin 7-O-neohesperidoside(Neohesperidin) | Flavanones     | 39    | 0.28623 | 08     | D-Xylonic acid                                      | Organic acids  | 95    | 2.12523 |
| kz0016 |                                                |                | 1.096 |         | kz0051 |                                                     | 1.071          |       |         |
| 95     | wogonoside                                     | Flavones       | 26    | 0.29226 | 32     | Luteolin-caffeoyl-O-rhamnoside                      | Flavones       | 54    | 2.11612 |
| km126  |                                                |                | 1.104 |         | kz0031 |                                                     | 1.056          |       |         |
| 9      | Di-O-methylquercetin                           | Flavonols      | 23    | 0.29287 | 09     | Mearnsitrin                                         | Flavones       | 61    | 2.09911 |
| kz0011 |                                                |                | 1.093 |         | kz0005 |                                                     | 1.065          |       |         |
| 84     | Skimmin                                        | Coumarins      | 58    | 0.29456 | 15     | Sinapinaldehyde                                     | Phenolic acids | 90    | 2.08977 |
| km054  |                                                |                | 1.100 |         | kz0025 |                                                     | 1.058          |       |         |
| 8      | Dihydroquercetin (Taxifolin)                   | Flavonols      | 37    | 0.29535 | 57     | 4-O-glucosyl-3,4-dihydroxybenzyl alcohol            | Phenolic acids | 75    | 2.06623 |
| kz0050 |                                                |                | 1.076 |         | kz0046 |                                                     | 1.076          |       |         |
| 46     | Dihydrokaempferol-3-O-β-D-glucoside            | Flavanols      | 06    | 0.29552 | 78     | Annuionone D                                        | Others         | 08    | 2.06279 |
| kz0047 |                                                |                | 1.100 |         | kz0013 |                                                     | 1.055          |       |         |
| 35     | Ligraminol E                                   | Others         | 45    | 0.29897 | 12     | Shikimic acid                                       | Organic acids  | 14    | 0.48580 |
| kz0053 |                                                |                | 1.087 |         | km121  |                                                     | 1.022          |       |         |
| 73     | Lyoniresinol                                   | Lignans        | 08    | 0.29915 | 1      | Chrysoeriol 7-O-hexoside                            | Flavones       | 71    | 0.47626 |
| kz0053 |                                                |                | 1.101 |         | kz0002 |                                                     | 1.080          |       |         |
| 77     | lyoniresinol-9'-O-β-D-xylopyranoside           | Lignans        | 51    | 0.30052 | 01     | D-galacitol                                         | Others         | 02    | 0.47400 |
| kz0012 |                                                |                | 1.094 |         | kz0008 |                                                     | 1.075          |       |         |
| 85     | 2-Methylsuccinic acid                          | Organic acids  | 31    | 0.30138 | 89     | Spiraeoside                                         | Flavonols      | 84    | 0.47048 |
| kz0053 |                                                |                | 1.094 |         | kz0004 |                                                     | 1.076          |       |         |
| 89     | Byzantionoside A                               | Others         | 10    | 0.30241 | 41     | Hesperetin 5-O-glucoside                            | Flavanols      | 49    | 0.46202 |
| kz0029 |                                                |                | 1.102 |         | kz0008 |                                                     | 1.070          |       |         |
| 33     | Ixerin D                                       | Terpenoids     | 07    | 0.30375 | 00     | Chrysoeriol-5-O-hexoside                            | Flavones       | 56    | 0.45729 |
| km064  | Hesperetin 7-rutinoside (Hesperidin)           | Flavanones     | 1.091 | 0.30467 | kz0015 | Stachydrine                                         | Alkaloids      | 1.070 | 0.45475 |

|        |                                                   |                |       |         |        |                                                    |                |       |         |
|--------|---------------------------------------------------|----------------|-------|---------|--------|----------------------------------------------------|----------------|-------|---------|
| 0      |                                                   |                | 03    |         | 98     |                                                    | 83             |       |         |
| kz0033 |                                                   |                | 1.061 |         | kz0046 |                                                    | 1.062          |       |         |
| 70     | Swertiamarin                                      | Terpenoids     | 11    | 0.30468 | 97     | Taxifolin-3'-O-β-D-glucoside                       | Flavones       | 19    | 0.45427 |
| kz0022 |                                                   |                | 1.100 |         | kz0002 |                                                    |                | 1.032 |         |
| 21     | Eucommin A                                        | Lignans        | 02    | 0.30479 | 59     | Thiamine                                           | Vitamins       | 41    | 0.45184 |
| kz0005 |                                                   |                | 1.101 |         | kz0012 |                                                    |                | 1.064 |         |
| 11     | Ferulic acid                                      | Phenolic acids | 54    | 0.30875 | 85     | 2-Methylsuccinic acid                              | Organic acids  | 32    | 0.45123 |
| km129  |                                                   |                | 1.099 |         | kz0029 |                                                    |                | 1.063 |         |
| 3      | Hesperetin O-malonylhexoside                      | Flavanones     | 61    | 0.31119 | 77     | Diosmetin-7-O-galactoside                          | Flavones       | 75    | 0.44965 |
| km130  |                                                   |                | 1.093 |         | kz0005 |                                                    |                | 1.032 |         |
| 7      | Isorhamnetin 5-O-hexoside                         | Flavonols      | 60    | 0.31510 | 96     | β-D-Furanofructosyl-α-D-(6-mustard acyl)glucoside  | Phenolic acids | 79    | 0.44759 |
| kz0036 |                                                   |                | 1.095 |         | kz0052 |                                                    |                | 1.064 |         |
| 90     | Quercetin-3-O-α-L-rhamnopyranoside                | Flavonols      | 11    | 0.32333 | 47     | Limonin                                            | Others         | 94    | 0.44677 |
| kz0038 |                                                   |                | 1.100 |         | km025  |                                                    |                | 1.076 |         |
| 48     | Cinchonain Ic                                     | Flavanols      | 72    | 0.32438 | 8      | (+)-cis,trans-Absciscic acid (ABA)                 | Others         | 78    | 0.43955 |
| kz0050 |                                                   |                | 1.015 |         | kz0017 |                                                    |                | 1.038 |         |
| 37     | Caffeoylferuloylshikimic?acid                     | Phenolic acids | 54    | 0.33252 | 10     | Stilbostemin B                                     | Others         | 25    | 0.42844 |
| kz0004 |                                                   |                | 1.076 |         | km126  |                                                    |                | 1.074 |         |
| 17     | Phloretin                                         | Chalcones      | 39    | 0.33271 | 9      | 3,7-Di-O-methylquercetin                           | Flavonols      | 49    | 0.42691 |
| kz0050 |                                                   |                | 1.099 |         | kz0012 |                                                    |                | 1.063 |         |
| 88     | Tricetin?4'-methyl?ether-3'-O-β-D-glucoside       | Flavonols      | 63    | 0.33279 | 92     | 4-Acetamidobutyric acid                            | Organic acids  | 11    | 0.42113 |
| kz0008 |                                                   |                | 1.100 |         | kz0030 |                                                    |                | 1.072 |         |
| 12     | Tricin O-saccharic acid                           | Flavones       | 58    | 0.33559 | 38     | 3-O-(2-O-Acetyl-β-D-glucopyranosyl) oleanolic acid | Terpenoids     | 05    | 0.41982 |
| kz0017 |                                                   |                | 1.097 |         | kz0005 |                                                    |                | 1.058 |         |
| 39     | Quercetin-3-O-(2''-galloyl)-β-D-glucoside         | Flavonols      | 73    | 0.33727 | 39     | 3-Hydroxy-4-isopropylbenzylalcohol 3-glucoside     | Phenolic acids | 76    | 0.41242 |
| kz0023 |                                                   |                | 1.063 |         | kz0029 |                                                    |                | 1.069 |         |
| 67     | Methyl dioxindole-3-acetate                       | Others         | 18    | 0.33733 | 10     | Parthenolide                                       | Terpenoids     | 96    | 0.38817 |
| kz0029 |                                                   |                | 1.089 |         | kz0010 |                                                    |                | 1.046 |         |
| 76     | Scutellarin(Scutellarein-7-O-glucuronide)         | Flavones       | 01    | 0.33953 | 32     | N-Acetyl-D-galactosamine                           | Others         | 64    | 0.38754 |
| kz0003 |                                                   |                | 1.091 |         | kz0008 |                                                    |                | 1.070 |         |
| 10     | Pyruvic acid                                      | Organic acids  | 78    | 0.34171 | 88     | Quercetin-3-O-β-D-Galactoside (Hyperin)            | Flavonols      | 94    | 0.38250 |
| kz0028 |                                                   |                | 1.068 |         | kz0012 |                                                    |                | 1.070 |         |
| 07     | Dimethylmalonic acid                              | Organic acids  | 27    | 0.34427 | 79     | L-Homoserine                                       | Organic acids  | 98    | 0.37917 |
| kz0038 |                                                   |                | 1.097 |         | kz0004 |                                                    |                | 1.075 |         |
| 29     | Quercetin 3-O-(6''-galloyl)-β-D-galactopyranoside | Flavonols      | 32    | 0.34535 | 79     | Cinnamic acid                                      | Phenolic acids | 49    | 0.37014 |
| kz0013 |                                                   | Proanthocyani  | 1.101 |         | kz0010 |                                                    |                | 1.079 |         |
| 35     | Procyanidin B1                                    | dins           | 16    | 0.34613 | 91     | Euscaphic acid                                     | Terpenoids     | 62    | 0.36789 |
| kz0041 |                                                   |                | 1.104 |         | kz0003 |                                                    |                | 1.065 |         |
| 70     | Rhamnetin 3-O-β-D-Glucoside                       | Flavonols      | 87    | 0.34947 | 10     | Pyruvic acid                                       | Organic acids  | 39    | 0.36477 |
| kz0001 |                                                   |                | 1.099 |         | kz0005 |                                                    |                | 1.040 |         |
| 47     | Methylquercetin O-hexoside                        | Flavonols      | 10    | 0.35082 | 55     | 1-Caffeoylquinic acid                              | Phenolic acids | 29    | 0.36258 |
| kz0005 | 3,4-Dimethoxycinnamic acid                        | Phenolic acids | 1.099 | 0.35137 | kz0026 | Eriodictyol-O-glucoside                            | Flavones       | 1.075 | 0.36000 |

|        |                                                           |                   |       |         |        |                                                           |                           |
|--------|-----------------------------------------------------------|-------------------|-------|---------|--------|-----------------------------------------------------------|---------------------------|
| 14     |                                                           |                   | 32    |         | 73     |                                                           | 47                        |
| kz0029 |                                                           |                   | 1.102 |         | kz0005 |                                                           | 1.046                     |
| 82     | 6-methoxykaempferol-3-O-glucoside                         | Flavonols         | 58    | 0.35328 | 44     | 3-O-p-Coumaroyl quinic acid                               | Phenolic acids 15 0.35473 |
| kz0037 |                                                           |                   | 1.065 |         | kz0035 |                                                           | 1.070                     |
| 18     | 2,3-Di-O-Galloyl-D-Glucose                                | Phenolic acids    | 28    | 0.35390 | 40     | Dihydrokaempferol-7-O-glucoside                           | Flavonols 65 0.35232      |
| kz0038 |                                                           |                   | 1.079 |         | kz0004 |                                                           | 1.046                     |
| 21     | Kampferol 3-O-(6''-galloyl)-β-D-galactopyranoside         | Flavonols         | 52    | 0.35449 | 17     | Phloretin                                                 | Chalcones 33 0.34673      |
| kz0013 |                                                           |                   | 1.083 |         | kz0010 |                                                           | 1.052                     |
| 08     | D-Xylonic acid                                            | Organic acids     | 82    | 0.35462 | 25     | D-Glucurono-6,3-lactone                                   | Others 24 0.34432         |
| kz0004 |                                                           |                   | 1.097 |         | kz0047 |                                                           | 1.077                     |
| 12     | Aucubin                                                   | Terpenoids        | 02    | 0.35575 | 74     | (2R)-Pinocembrin-7-neohesperidoside                       | Flavanones 02 0.33915     |
| kz0028 |                                                           |                   | 1.082 |         | kz0000 |                                                           | 1.071                     |
| 29     | Isorhamnetin-7-O-glucoside                                | Flavonols         | 90    | 0.35596 | 70     | Anthranilate O-hexosyl-O-hexoside                         | Phenolic acids 41 0.33691 |
| kz0015 |                                                           |                   | 1.101 |         | kz0037 |                                                           | 1.036                     |
| 81     | Calceorioside B                                           | Others            | 06    | 0.35807 | 21     | Maplexin G                                                | Phenolic acids 49 0.33227 |
| kz0050 |                                                           |                   | 1.092 |         | kz0002 |                                                           | 1.063                     |
| 79     | Kaempferol-4'-O-β-D-glucopyranoside                       | Flavonols         | 11    | 0.35862 | 94     | 2-Hydroxyisocaproic acid                                  | Organic acids 05 0.32836  |
| km140  |                                                           |                   | 1.089 |         | kz0051 |                                                           | 1.074                     |
| 5      | Nicotinic acid-hexoside                                   | Vitamins          | 65    | 0.36025 | 87     | Dunalianoside B                                           | Phenolic acids 45 0.32303 |
| kz0013 |                                                           | Proanthocyanidins | 1.100 |         | kz0028 |                                                           | 1.075                     |
| 32     | Procyanidin B2                                            |                   | 45    | 0.36027 | 53     | Dihydroisopelletierine                                    | Alkaloids 93 0.32101      |
| kz0008 |                                                           |                   | 1.100 |         | kz0012 |                                                           | 1.076                     |
| 88     | Quercetin-3-O-β-D-Galactoside (Hyperin)                   | Flavonols         | 78    | 0.36034 | 68     | 2-Furanoic acid                                           | Organic acids 69 0.31792  |
| kz0013 |                                                           | Proanthocyanidins | 1.101 |         | kz0006 |                                                           | 1.023                     |
| 33     | Procyanidin B3                                            |                   | 56    | 0.36107 | 98     | Cyanidin-3-O-galactoside                                  | Anthocyanins 34 0.31296   |
| kz0026 |                                                           |                   | 1.082 |         | kz0037 |                                                           | 1.025                     |
| 04     | Kaempferol-3-O-(6''-acetyl)-glucoside                     | Flavonols         | 76    | 0.36176 | 93     | Dihydromyricetin-O-glucoside                              | Flavanols 85 0.31035      |
| kz0038 |                                                           |                   | 1.090 |         | kz0041 |                                                           | 1.076                     |
| 23     | Kampferol 3-O-(2''-galloyl)-β-D-galactopyranoside         | Flavonols         | 89    | 0.36201 | 33     | L-Ascorbic acid                                           | Vitamins 52 0.30850       |
| kz0002 |                                                           |                   | 1.087 |         | kz0009 |                                                           | 1.073                     |
| 93     | Glutaric acid                                             | Organic acids     | 97    | 0.36568 | 15     | 6-Hydroxykaempferol-7,6-O-Diglucoside                     | Flavonols 67 0.30565      |
| kz0009 |                                                           |                   | 1.010 |         | km022  |                                                           | 1.080                     |
| 23     | 6-Hydroxykaempferol-3,6-O-Diglucoside-7-O-Glucuronic Acid | Flavonols         | 82    | 0.36753 | 8      | Quercetin 3-O-glucoside (Isotrifoliin)                    | Flavonols 05 0.30417      |
| kz0031 |                                                           |                   | 1.085 |         | kz0022 |                                                           | 1.079                     |
| 51     | Ailantinol E                                              | Others            | 20    | 0.37079 | 14     | isohyperoside                                             | Flavonols 83 0.29816      |
| kz0037 |                                                           |                   | 1.063 |         | km068  |                                                           | 1.074                     |
| 21     | Maplexin G                                                | Phenolic acids    | 36    | 0.37100 | 6      | Kaempferol 3-O-rhamnoside (Kaempferin)                    | Flavonols 13 0.29358      |
| kz0011 |                                                           |                   | 1.104 |         | kz0009 |                                                           | 1.000                     |
| 56     | Pyridoxine                                                | Vitamins          | 00    | 0.37118 | 23     | 6-Hydroxykaempferol-3,6-O-Diglucoside-7-O-Glucuronic Acid | Flavonols 44 0.29276      |
| kz0007 |                                                           |                   | 1.068 |         | kz0004 |                                                           | 1.073                     |
| 98     | Luteolin-7-O-glucuronide                                  | Flavones          | 35    | 0.37120 | 87     | 2,5-Dihydroxybenzoic acid                                 | Phenolic acids 40 0.28956 |
| kz0005 | 3,4,5-Trimethoxyphenyl-β-D-Glucopyranoside                | Phenolic acids    | 1.103 | 0.37131 | kz0008 | 6-Hydroxykaempferol-7-O-glucoside                         | Flavonols 1.077 0.28914   |

|        |                                                                    |                |       |         |        |                                          |                |       |         |
|--------|--------------------------------------------------------------------|----------------|-------|---------|--------|------------------------------------------|----------------|-------|---------|
| 40     |                                                                    |                | 09    |         | 92     |                                          | 69             |       |         |
| kz0012 |                                                                    |                | 1.103 |         | kz0042 |                                          | 1.073          |       |         |
| 97     | (Rs)-Mevalonic acid                                                | Organic acids  | 81    | 0.37167 | 33     | Terminolic acid                          | Terpenoids     | 07    | 0.28813 |
| kz0041 |                                                                    |                | 1.086 |         | kz0038 |                                          |                | 1.076 |         |
| 69     | Isorhamnetin 3-O-β-D-Glucoside                                     | Flavonols      | 88    | 0.37252 | 63     | Sanguisorbigenin                         | Terpenoids     | 05    | 0.28589 |
| kz0017 |                                                                    |                | 1.075 |         | kz0031 |                                          |                | 1.074 |         |
| 02     | Kaempferol-3-O-β-D-glucuronide                                     | Flavonols      | 07    | 0.37539 | 08     | mlyricetin 3-O-B-D-glucopyranoside       | Flavonols      | 62    | 0.28580 |
| kz0038 |                                                                    |                | 1.060 |         | km007  |                                          |                | 1.077 |         |
| 61     | 3-O-Trans-feruloyl euscaphic acid                                  | Terpenoids     | 84    | 0.38225 | 1      | Quercetin 3-O-galactoside (Hyperin)      | Flavonols      | 64    | 0.28473 |
| kz0008 |                                                                    |                | 1.097 |         | kz0011 |                                          |                | 1.072 |         |
| 00     | Chrysoeriol-5-O-hexoside                                           | Flavones       | 57    | 0.38358 | 84     | Skimmin                                  | Coumarins      | 96    | 0.28132 |
| kz0008 |                                                                    |                | 1.096 |         | kz0007 |                                          |                | 1.020 |         |
| 84     | Kaempferol-3-O-glucoside (Astragalin)                              | Flavonols      | 36    | 0.38464 | 00     | Cyanidin-3-O-glucoside (Kuromanin)       | Anthocyanins   | 94    | 0.27875 |
| kz0036 |                                                                    |                | 1.077 |         | km081  |                                          |                | 1.078 |         |
| 36     | Plantainoside A                                                    | Phenolic acids | 43    | 0.38692 | 4      | Morin dihydrate                          | Flavonols      | 65    | 0.27494 |
| kz0009 |                                                                    |                | 1.103 |         | kz0031 |                                          |                | 1.028 |         |
| 78     | Catechin-(7,8-bc)-4β-(3,4-dihydroxyphenyl)-dihydro-2-(3H)-pyranone | Flavanols      | 10    | 0.38800 | 16     | 2,4,6-trihydroxy benzoic acid            | Organic acids  | 01    | 0.27070 |
| kz0002 |                                                                    |                | 1.097 |         | kz0004 |                                          |                | 1.075 |         |
| 58     | Nicotinate D-ribonucleoside                                        | Vitamins       | 54    | 0.38914 | 89     | Protocatechuic acid                      | Phenolic acids | 60    | 0.26909 |
| kz0008 |                                                                    |                | 1.087 |         | kz0013 |                                          |                | 1.076 |         |
| 66     | Quercetin                                                          | Flavonols      | 10    | 0.39025 | 02     | 2,3-Dihydroxybenzoic Acid                | Organic acids  | 89    | 0.26813 |
| kz0010 |                                                                    |                | 1.102 |         | kz0000 |                                          |                | 1.078 |         |
| 96     | Choline                                                            | Alkaloids      | 16    | 0.39030 | 49     | 2-(Formylamino)benzoic acid              | Phenolic acids | 69    | 0.26803 |
| kz0004 |                                                                    |                | 1.105 |         | kz0025 |                                          |                | 1.075 |         |
| 41     | Hesperetin 5-O-glucoside                                           | Flavanols      | 00    | 0.39111 | 54     | p-Hydroxycinnamic acid                   | Phenolic acids | 51    | 0.26639 |
| kz0005 |                                                                    |                | 1.095 |         | kz0004 |                                          |                | 1.069 |         |
| 55     | 1-Caffeoylquinic acid                                              | Phenolic acids | 02    | 0.39318 | 40     | Astilbin                                 | Flavanols      | 12    | 0.26620 |
| kz0000 |                                                                    |                | 1.065 |         | kz0011 |                                          |                | 1.067 |         |
| 32     | Caffeoylagmatine                                                   | Alkaloids      | 44    | 0.39482 | 75     | Esculetin                                | Coumarins      | 56    | 0.26272 |
| kz0019 |                                                                    |                | 1.085 |         | kz0030 |                                          |                | 1.077 |         |
| 73     | Kaempferol-3-O-(cinnamoyl)-sophoroside-7-O-glucose                 | Flavonols      | 53    | 0.39576 | 99     | Di-O-Glucose-quinic acid                 | Phenolic acids | 95    | 0.25974 |
| kz0005 |                                                                    |                | 1.066 |         | kz0050 |                                          |                | 1.066 |         |
| 15     | Sinapinaldehyde                                                    | Phenolic acids | 57    | 0.39937 | 37     | Caffeoylferuloylshikimic?acid            | Phenolic acids | 28    | 0.25718 |
| kz0008 |                                                                    |                | 1.103 |         | kz0020 |                                          |                | 1.051 |         |
| 89     | Spiraeoside                                                        | Flavonols      | 29    | 0.40120 | 08     | 3,5,7,4'--Tetrahydroxy-Coumaronochromone | Others         | 41    | 0.25682 |
| kz0009 |                                                                    |                | 1.101 |         | kz0005 |                                          |                | 1.067 |         |
| 79     | Catechin-(7,8-bc)-4α-(3,4-dihydroxyphenyl)-dihydro-2-(3H)-pyranone | Flavanols      | 74    | 0.40159 | 48     | Trans-3-O-p-coumaric quinic acid         | Phenolic acids | 15    | 0.25560 |
| kz0007 |                                                                    |                | 1.077 |         | kz0012 |                                          |                | 1.070 |         |
| 95     | Luteolin-7-O-glucoside(Cynaroside)                                 | Flavones       | 90    | 0.40453 | 87     | (S)-(-)-2-Hydroxyisocaproic acid         | Organic acids  | 75    | 0.24349 |
| kz0031 |                                                                    |                | 1.024 |         | kz0004 |                                          |                | 1.078 |         |
| 58     | Ailanindole                                                        | Alkaloids      | 34    | 0.40462 | 24     | Eriodictyol                              | Flavanones     | 24    | 0.24164 |
| kz0005 | Neochlorogenic acid(5-O-Caffeoylquinic acid)                       | Phenolic acids | 1.075 | 0.40726 | kz0011 | Trigonelline                             | Alkaloids      | 1.078 | 0.24102 |

|        |                                                            |                |       |         |        |                                                       |                |               |
|--------|------------------------------------------------------------|----------------|-------|---------|--------|-------------------------------------------------------|----------------|---------------|
| 53     |                                                            |                | 85    |         | 01     |                                                       | 56             |               |
| kz0053 |                                                            |                | 1.101 |         | kz0004 |                                                       | 1.066          |               |
| 75     | Isolariciresinol 9'-O-Glucoside                            | Lignans        | 50    | 0.40823 | 10     | Sweroside                                             | Terpenoids     | 47 0.24090    |
| kz0050 |                                                            |                | 1.101 |         | kz0004 |                                                       | 1.077          |               |
| 78     | Kaempferol-7-O-β-D-glucopyranoside                         | Flavonols      | 55    | 0.40937 | 91     | p-Coumaric acid                                       | Phenolic acids | 10 0.23148    |
| kz0046 |                                                            |                | 1.088 |         | kz0046 |                                                       | 1.078          |               |
| 97     | Taxifolin-3'-O-β-D-glucoside                               | Flavones       | 59    | 0.40968 | 36     | 2α-hydroxypyraacrenic acid                            | Terpenoids     | 15 0.22649    |
| kz0009 |                                                            |                | 1.056 |         | kz0005 |                                                       | 1.077          |               |
| 74     | Gallocatechin                                              | Flavanols      | 50    | 0.41000 | 77     | Hexahydroxydiphenylglucose                            | Phenolic acids | 56 0.21978    |
| km068  |                                                            |                | 1.093 |         | kz0012 |                                                       | 1.070          |               |
| 6      | Kaempferol 3-O-rhamnoside (Kaempferin)                     | Flavonols      | 33    | 0.41027 | 98     | L-(+)-Tartaric acid                                   | Organic acids  | 31 0.21813    |
| kz0010 |                                                            |                | 1.097 |         | kz0026 |                                                       | 1.067          |               |
| 97     | Betaine                                                    | Alkaloids      | 20    | 0.41856 | 87     | Nortrachelogenin 4-O-β-D-glucoside                    | Lignans        | 04 0.21745    |
| km068  |                                                            |                | 1.102 |         | kz0011 |                                                       | 1.075          |               |
| 3      | Kaempferol 3-O-galactoside (Trifolin)                      | Flavonols      | 11    | 0.42220 | 56     | Pyridoxine                                            | Vitamins       | 41 0.21375    |
| kz0007 |                                                            |                | 1.059 |         | kz0036 |                                                       | 1.069          |               |
| 97     | Tetahydroxy-flavone-7-O-β-D-glucuronide                    | Flavones       | 13    | 0.42286 | 36     | Plantainoside A                                       | Phenolic acids | 96 0.20950    |
| km008  |                                                            |                | 1.066 |         | kz0017 |                                                       | 1.070          |               |
| 1      | Genistein (4',5,7-Trihydroxyisoflavone)                    | Isoflavones    | 41    | 0.42395 | 06     | Isololiolide                                          | Others         | 91 0.20931    |
| kz0047 |                                                            |                | 1.102 |         | kz0022 |                                                       | 1.075          |               |
| 71     | Epicatechin glucoside                                      | Flavanols      | 26    | 0.43593 | 20     | Olivil-4'-O-β-D-glucoside                             | Lignans        | 66 0.20784    |
| kz0009 |                                                            |                | 1.081 |         | kz0001 |                                                       | 1.077          |               |
| 97     | Terpineol monO-glucoside                                   | Lignans        | 55    | 0.43719 | 45     | Formononetin                                          | Isoflavones    | 91 0.20713    |
| kz0005 |                                                            |                | 1.099 |         | kz0012 |                                                       | 1.066          |               |
| 01     | Methyl p-coumarate                                         | Phenolic acids | 61    | 0.43878 | 89     | Malic acid,D                                          | Organic acids  | 09 0.19833    |
| kz0052 |                                                            |                | 1.100 |         | kz0011 |                                                       | 1.079          |               |
| 02     | Dihydrokaempferol                                          | Flavanols      | 78    | 0.43919 | 54     | Nicotinamide                                          | Vitamins       | 61 0.19735    |
| km023  |                                                            |                | 1.070 |         | kz0008 |                                                       | 1.076          |               |
| 5      | Apigenin                                                   | Flavones       | 66    | 0.44050 | 64     | Kaempferol                                            | Flavonols      | 09 0.19324    |
| km077  |                                                            |                | 1.078 |         | kz0047 | 2-Hydroxy-5,8,11,14,17-icosapentaenoyloxy]propyl-2-   |                | 1.079         |
| 9      | Luteolin 7-O-glucoside                                     | Flavones       | 29    | 0.44130 | 62     | (trimethylammonio)ethyl phosphate                     | Alkaloids      | 11 0.19282    |
| kz0038 |                                                            |                | 1.103 |         | kz0000 |                                                       | 1.062          |               |
| 49     | dihydrodehydrodiconiferyl alcohol 4-O-β-D-glucopyranosides | Lignans        | 13    | 0.44269 | 40     | N,N'-Bis(Sinapoyl)Spermidine                          | Alkaloids      | 11 0.18492    |
| kz0012 |                                                            |                | 1.093 |         | kz0017 |                                                       | 1.055          |               |
| 93     | 4-Guanidinobutyric acid                                    | Organic acids  | 66    | 0.44386 | 42     | Methyl Brevifolincarboxylate                          | Others         | 67 0.18314    |
| kz0026 |                                                            |                | 1.081 |         | kz0047 |                                                       | 1.079          |               |
| 87     | Nortrachelogenin 4-O-β-D-glucoside                         | Lignans        | 51    | 0.44481 | 38     | 4,7,9,9'-Tetrahydroxy-3,3'-dimethoxy-8-O-4'-neolignan | Others         | 29 0.18172    |
| kz0013 |                                                            | Proanthocyani  | 1.068 |         | kz0038 |                                                       | 1.076          |               |
| 40     | Procyanidin C2                                             | dins           | 09    | 0.44676 | 54     | Roseoside                                             | Others         | 58 0.18128    |
| kz0026 |                                                            |                | 1.087 |         | kz0047 |                                                       | 1.057          |               |
| 07     | Lariciresinol glucopyranoside                              | Others         | 34    | 0.44802 | 35     | Ligraminol E                                          | Others         | 65 0.17814    |
| kz0052 | Neodiosmin (Diosmetin-7-O-Neohesperidoside)                | Flavones       | 1.088 | 0.45097 | kz0010 | Oleanolic acid 2-O-β-D-glucopyranoside                | Terpenoids     | 1.076 0.17808 |



|        |                                                     |                |       |         |        |                                   |                |               |
|--------|-----------------------------------------------------|----------------|-------|---------|--------|-----------------------------------|----------------|---------------|
| 26     |                                                     |                | 17    |         | 93     |                                   | 16             |               |
| kz0005 |                                                     |                | 1.088 |         | kz0040 |                                   | 1.077          |               |
| 32     | Protocatechuic acid-4-glucoside                     | Phenolic acids | 22    | 0.45271 | 15     | Cis-p-coumaric acid 4-O-glucoside | Others         | 11 0.17325    |
| kz0031 |                                                     |                | 1.077 |         | kz0031 |                                   | 1.079          |               |
| 09     | Mearnsitrin                                         | Flavones       | 31    | 0.45788 | 00     | 5-O-Galloylhamamelose             | Phenolic acids | 52 0.16981    |
| kz0037 |                                                     |                | 1.055 |         | kz0042 |                                   | 1.076          |               |
| 28     | Geniposide                                          | Terpenoids     | 29    | 0.46158 | 31     | Isothankunic acid                 | Terpenoids     | 05 0.16889    |
| kz0011 |                                                     |                | 1.099 |         | kz0034 |                                   | 1.079          |               |
| 55     | Nicotinic acid                                      | Vitamins       | 80    | 0.46408 | 97     | 3-O-Galloyl-β-D-glucose           | Phenolic acids | 75 0.16566    |
| kz0009 |                                                     |                | 1.100 |         | kz0037 |                                   | 1.079          |               |
| 71     | Catechin                                            | Flavanols      | 57    | 0.47079 | 14     | 6-O-Galloylglucose                | Phenolic acids | 18 0.16176    |
| kz0005 |                                                     |                | 1.089 |         | kz0029 |                                   | 1.079          |               |
| 12     | Syringic acid                                       | Phenolic acids | 83    | 0.47510 | 33     | Ixerin D                          | Terpenoids     | 20 0.16125    |
| kz0008 |                                                     |                | 1.096 |         | kz0025 |                                   | 1.077          |               |
| 31     | Diosmin                                             | Flavones       | 26    | 0.47734 | 48     | p-Coumaric acid-O-glycoside       | Phenolic acids | 97 0.15936    |
| kz0038 |                                                     |                | 1.009 |         | kz0046 |                                   | 1.024          |               |
| 50     | (-)-secoisolariciresinol 4-O-β-D-giucopyranoside    | Lignans        | 39    | 0.48009 | 30     | 2α-hydroxyursolic acid            | Terpenoids     | 79 0.15640    |
| kz0018 |                                                     |                | 1.048 |         | kz0010 |                                   | 1.075          |               |
| 80     | feruloylsinapoyltartaric acid                       | Phenolic acids | 87    | 0.48454 | 75     | Methyl gallate                    | Phenolic acids | 96 0.15308    |
| kz0053 |                                                     |                | 1.055 |         | kz0005 |                                   | 1.077          |               |
| 78     | 5'-methoxyisolariciresinol-9'-O-β-D-glucopyranoside | Lignans        | 67    | 0.48741 | 73     | p-Coumaroylferuloyltartaric acid  | Phenolic acids | 82 0.15084    |
| kz0004 |                                                     |                | 1.080 |         | kz0000 |                                   | 1.070          |               |
| 14     | 2-Picolylamine                                      | Alkaloids      | 22    | 0.48826 | 47     | Mandelic acid                     | Phenolic acids | 22 0.15004    |
| kz0011 |                                                     |                | 1.098 |         | kz0038 |                                   | 1.075          |               |
| 77     | Scoparone                                           | Coumarins      | 16    | 0.49726 | 60     | Caffeoyl hawthorn acid            | Terpenoids     | 19 0.14956    |
| kz0025 |                                                     |                | 1.050 |         | kz0038 |                                   | 1.076          |               |
| 52     | Sinapic acid-glycoside                              | Phenolic acids | 57    | 0.50000 | 61     | 3-O-Trans-feruloyl euscaphic acid | Terpenoids     | 12 0.14647    |
| kz0012 |                                                     |                | 1.102 |         | kz0037 |                                   | 1.059          |               |
| 87     | (S)-(-)-2-Hydroxyisocaproic acid                    | Organic acids  | 01    | 2.01836 | 18     | 2,3-Di-O-Galloyl-D-Glucose        | Phenolic acids | 57 0.14229    |
| kz0050 |                                                     |                | 1.001 |         | kz0005 |                                   | 1.077          |               |
| 55     | Galangin-7-glucoside                                | Flavones       | 99    | 2.02191 | 54     | Chlorogenic acid                  | Phenolic acids | 10 0.14008    |
| kz0024 |                                                     |                | 1.102 |         | kz0011 |                                   | 1.073          |               |
| 19     | Ergotamine                                          | Alkaloids      | 62    | 2.11346 | 77     | Scoparone                         | Coumarins      | 00 0.13825    |
| kz0009 |                                                     |                | 1.096 |         | kz0010 |                                   | 1.077          |               |
| 09     | Quercetin-3-O-rutinoside (Rutin)                    | Flavonols      | 23    | 2.11908 | 97     | Betaine                           | Alkaloids      | 24 0.13799    |
| kz0046 |                                                     |                | 1.087 |         | kz0005 |                                   | 1.075          |               |
| 78     | Annuionone D                                        | Others         | 72    | 2.11921 | 04     | Caffeic acid                      | Phenolic acids | 73 0.13758    |
| kz0021 |                                                     |                | 1.071 |         | kz0052 |                                   | 1.077          |               |
| 96     | 2'-Hydoxy,5-methoxy Genistein-O-rhamnosyl-glucoside | Isoflavones    | 37    | 2.12483 | 11     | 5,7,8,4'-Tetramethoxyflavone      | Flavones       | 94 0.13588    |
| kz0001 |                                                     |                | 1.104 |         | km111  |                                   | 1.070          |               |
| 45     | Formononetin                                        | Isoflavones    | 45    | 2.16086 | 3      | 5-O-p-Coumaroyl shikimic acid     | Phenolic acids | 54 0.13398    |
| kz0001 | Naringenin 7-O-glucoside (Prunin)                   | Flavanols      | 1.099 | 2.19231 | kz0051 | Camaldulenic acid                 | Terpenoids     | 1.077 0.13382 |

|        |                                                     |                |       |         |        |                                                     |                |               |
|--------|-----------------------------------------------------|----------------|-------|---------|--------|-----------------------------------------------------|----------------|---------------|
| 59     |                                                     |                | 39    |         | 36     |                                                     | 86             |               |
| kz0003 |                                                     |                | 1.101 |         | kz0009 |                                                     | 1.078          |               |
| 08     | N-[-]-Jasmonoyl]-(-)-Isoleucine (JA-L-Ile)          | Organic acids  | 76    | 2.22345 | 92     | Pinoresinol                                         | Lignans        | 79 0.13110    |
| kz0029 |                                                     |                | 1.095 |         | kz0022 |                                                     | 1.078          |               |
| 10     | Parthenolide                                        | Terpenoids     | 93    | 2.25247 | 19     | Epipinoresinol                                      | Lignans        | 33 0.13095    |
| kz0009 |                                                     |                | 1.093 |         | kz0003 |                                                     | 1.077          |               |
| 08     | Quercetin-3-O-robinobioside                         | Flavonols      | 27    | 2.25738 | 04     | (±)-jasmonic acid                                   | Organic acids  | 61 0.12608    |
| kz0009 |                                                     |                | 1.099 |         | kz0010 |                                                     | 1.079          |               |
| 05     | Kaempferol-3-O-rutinoside(Nicotiflorin)             | Flavonols      | 86    | 2.27341 | 90     | Methoxyursolic acid                                 | Terpenoids     | 41 0.12368    |
| kz0009 |                                                     |                | 1.098 |         | kz0040 |                                                     | 1.079          |               |
| 06     | Kaempferol-3-O-robinobioside(Biorobin)              | Flavonols      | 83    | 2.27477 | 13     | Solatuberenol A                                     | Others         | 80 0.11026    |
| kz0046 |                                                     |                | 1.104 |         | kz0037 |                                                     | 1.071          |               |
| 32     | isoceanothic acid                                   | Terpenoids     | 83    | 2.27504 | 67     | Obtusilin                                           | Terpenoids     | 57 0.10413    |
| kz0027 |                                                     |                | 1.059 |         | km081  |                                                     | 1.074          |               |
| 88     | Sexangularetin 3-glucoside-7-rhamnoside             | Flavonols      | 82    | 2.29944 | 8      | Myricetin 3-O-rhamnoside (Myricitrin)               | Flavonols      | 40 0.09480    |
| kz0007 |                                                     |                | 1.075 |         | kz0000 |                                                     | 1.078          |               |
| 92     | Apigenin 5-O-glucoside                              | Flavones       | 41    | 2.40388 | 52     | Ethyl 3,4-Dihydroxybenzoate (Ethyl protocatechuate) | Phenolic acids | 15 0.09287    |
| kz0029 |                                                     |                | 1.077 |         | kz0003 |                                                     | 1.079          |               |
| 60     | Eupatilin                                           | Flavones       | 31    | 2.45423 | 08     | N-[-]-Jasmonoyl]-(-)-Isoleucine (JA-L-Ile)          | Organic acids  | 10 0.08780    |
| kz0038 |                                                     |                | 1.091 |         | kz0005 |                                                     | 1.075          |               |
| 62     | 3β-Hydroxy-28-norurs-17,19,21-trien                 | Terpenoids     | 52    | 2.46244 | 53     | Neochlorogenic acid(5-O-Caffeoylquinic acid)        | Phenolic acids | 12 0.07352    |
| kz0040 |                                                     |                | 1.083 |         | kz0037 |                                                     | 1.073          |               |
| 21     | 6-Deoxyfagomine                                     | Alkaloids      | 77    | 2.49283 | 20     | Maplexin H                                          | Phenolic acids | 39 0.07217    |
| km087  |                                                     |                | 1.079 |         | kz0031 |                                                     | 1.078          |               |
| 9      | Orotic acid                                         | Vitamins       | 48    | 2.52743 | 47     | Clemaphenol A                                       | Lignans        | 42 0.06825    |
| kz0009 |                                                     |                | 1.088 |         | kz0007 |                                                     | 1.053          |               |
| 12     | Isorhamnetin-3-O-rutinoside (Narcissin)             | Flavonols      | 45    | 2.56798 | 03     | Delphinidin-3-O-glucoside (Mirtillin)               | Anthocyanins   | 86 0.06728    |
| kz0002 |                                                     |                | 1.102 |         | kz0038 |                                                     | 1.070          |               |
| 31     | 5-Aminolevulinate                                   | Alkaloids      | 69    | 2.57224 | 21     | Kampferol 3-O-(6"-galloyl)-β-D-galactopyranoside    | Flavonols      | 31 0.05968    |
| kz0042 |                                                     |                | 1.103 |         | kz0006 |                                                     | 1.074          |               |
| 33     | Terminolic acid                                     | Terpenoids     | 11    | 2.66464 | 13     | 1,2,3,6-Tetra-O-Galloyl-D-Glucose                   | Phenolic acids | 03 0.05750    |
| kz0047 |                                                     |                | 1.087 |         | kz0010 |                                                     | 1.077          |               |
| 56     | N-Benzylmethylene isomethylamine                    | Alkaloids      | 88    | 2.66884 | 76     | Ethyl gallate                                       | Phenolic acids | 89 0.05539    |
| kz0005 |                                                     |                | 1.105 |         | kz0037 |                                                     | 1.071          |               |
| 84     | 5-O-p-Coumaroyl quinic acid O-hexoside              | Phenolic acids | 31    | 2.73214 | 19     | Methyl 4,6-di-O-galloyl-D-glucoside                 | Phenolic acids | 55 0.05475    |
| kz0012 |                                                     |                | 1.103 |         | kz0053 |                                                     | 1.076          |               |
| 83     | 6-Aminocaproic acid                                 | Organic acids  | 79    | 2.81845 | 89     | Byzantionoside A                                    | Others         | 86 0.05440    |
| kz0029 |                                                     |                | 1.097 |         | kz0000 |                                                     | 1.079          |               |
| 62     | Penduletin (5,4'-Dihydroxy-3,6,7-trimethoxyflavone) | Flavones       | 24    | 2.86255 | 55     | 3,4,5-Trimethoxycinnamic acid                       | Phenolic acids | 89 0.04896    |
| kz0042 |                                                     |                | 1.091 |         | km032  |                                                     | 1.079          |               |
| 63     | Osthole                                             | Coumarins      | 70    | 2.89337 | 9      | 3-(4-Hydroxyphenyl)propionic acid                   | Phenolic acids | 87 0.04767    |
| kz0000 | 3-O-p-Coumaroylshikimic acid                        | Phenolic acids | 1.097 | 2.94171 | kz0004 | 3-(4-Hydroxyphenyl)-propionic acid                  | Phenolic acids | 1.077 0.04740 |

|        |                                                                |                |       |         |        |                                                                             |                |       |         |
|--------|----------------------------------------------------------------|----------------|-------|---------|--------|-----------------------------------------------------------------------------|----------------|-------|---------|
| 59     |                                                                |                | 52    |         | 95     |                                                                             | 81             |       |         |
| kz0011 |                                                                |                | 1.058 |         | kz0046 |                                                                             | 1.080          |       |         |
| 03     | 6-Hydroxynicotinic acid                                        | Alkaloids      | 06    | 2.95274 | 32     | isoceanothic acid                                                           | Terpenoids     | 22    | 0.04736 |
| kz0007 |                                                                |                | 1.096 |         | kz0010 |                                                                             | 1.076          |       |         |
| 91     | Apigenin 7-O-glucoside(Cosmosiin)                              | Flavones       | 05    | 3.08682 | 74     | Gallic acid                                                                 | Phenolic acids | 34    | 0.04474 |
| kz0038 |                                                                |                | 1.104 |         | kz0009 |                                                                             | 1.080          |       |         |
| 72     | Lup-12-en-15 $\alpha$ ,19 $\beta$ -diol-3,11-dioxo-28-oic acid | Terpenoids     | 40    | 3.13494 | 79     | Catechin-(7,8-bc)-4 $\alpha$ -(3,4-dihydroxyphenyl)-dihydro-2-(3H)-pyranone | Flavanols      | 14    | 0.04322 |
| kz0000 |                                                                |                | 1.090 |         | kz0009 |                                                                             | 1.080          |       |         |
| 64     | 1-O-Feruloyl quinic acid                                       | Phenolic acids | 24    | 3.20162 | 78     | Catechin-(7,8-bc)-4 $\beta$ -(3,4-dihydroxyphenyl)-dihydro-2-(3H)-pyranone  | Flavanols      | 29    | 0.03990 |
| kz0042 |                                                                |                | 1.099 |         | km053  |                                                                             | 1.067          |       |         |
| 31     | Isothankunic acid                                              | Terpenoids     | 16    | 3.28889 | 2      | Delphinidin 3-O-glucoside (Mirtillin)                                       | Anthocyanins   | 90    | 0.03570 |
| kz0002 |                                                                |                | 1.105 |         | kz0012 |                                                                             | 1.078          |       |         |
| 32     | O-Phosphocholine                                               | Alkaloids      | 49    | 3.30817 | 97     | (Rs)-Mevalonic acid lithium salt                                            | Organic acids  | 80    | 0.03552 |
| km008  |                                                                |                | 1.080 |         | kz0001 |                                                                             | 1.078          |       |         |
| 0      | Biochanin A                                                    | Isoflavones    | 37    | 3.32088 | 56     | 7-O-Methyleriodictyol                                                       | Flavanols      | 70    | 0.03247 |
| kz0011 |                                                                |                | 1.070 |         | kz0012 |                                                                             | 1.079          |       |         |
| 13     | Lumichrome                                                     | Alkaloids      | 03    | 3.32532 | 81     | Citraconic acid                                                             | Organic acids  | 55    | 0.03035 |
| kz0050 |                                                                |                | 1.101 |         | kz0029 |                                                                             | 1.079          |       |         |
| 43     | Scopoletin?Beta-D-Glucuronide                                  | Coumarins      | 29    | 3.32968 | 62     | Penduletin (5,4'-Dihydroxy-3,6,7-trimethoxyflavone)                         | Flavones       | 81    | 0.02909 |
| kz0011 |                                                                |                | 1.097 |         | kz0001 |                                                                             | 1.079          |       |         |
| 93     | Prunetin                                                       | Isoflavones    | 55    | 3.68953 | 18     | Sakuranetin                                                                 | Flavones       | 64    | 0.02817 |
| kz0026 |                                                                |                | 1.104 |         | km129  |                                                                             | 1.079          |       |         |
| 73     | Eriodictyol-O-glucoside                                        | Flavones       | 05    | 4.02963 | 3      | Hesperetin O-malonylhexoside                                                | Flavanones     | 79    | 0.02731 |
| kz0051 |                                                                |                | 1.104 |         | kz0038 |                                                                             | 1.079          |       |         |
| 87     | Dunalianoside B                                                | Phenolic acids | 12    | 4.04620 | 48     | Cinchonain Ic                                                               | Flavanols      | 30    | 0.02639 |
| kz0021 |                                                                |                | 1.098 |         | kz0008 |                                                                             | 1.076          |       |         |
| 97     | 2'-Hydoxy,5-methoxy Genistein-4',7-O-diglucoside               | Isoflavones    | 45    | 4.18234 | 30     | Chrysoeriol-7-O-rutinoside                                                  | Flavones       | 88    | 0.02408 |
| kz0035 |                                                                |                | 1.101 |         | kz0009 |                                                                             | 1.079          |       |         |
| 40     | Dihydrokaempferol-7-O-glucoside                                | Flavonols      | 08    | 4.33561 | 97     | Terpineol mon-O-glucoside                                                   | Lignans        | 35    | 0.02299 |
| kz0004 |                                                                |                | 1.104 |         | kz0022 |                                                                             | 1.072          |       |         |
| 40     | Astilbin                                                       | Flavanols      | 27    | 4.36173 | 21     | Eucommin A                                                                  | Lignans        | 55    | 0.02296 |
| kz0004 |                                                                |                | 1.105 |         | kz0001 |                                                                             | 1.078          |       |         |
| 79     | Cinnamic acid                                                  | Phenolic acids | 09    | 4.75933 | 97     | E-3,4,5'-Trihydroxy-3'-glucopyranosylstilbene                               | Others         | 64    | 0.02156 |
| kz0031 |                                                                |                | 1.073 |         | kz0029 |                                                                             | 1.079          |       |         |
| 66     | 6-Hydroxy-7-methoxycoumarin                                    | Coumarins      | 25    | 4.86834 | 60     | Eupatilin                                                                   | Flavones       | 12    | 0.01979 |
| kz0012 |                                                                |                | 1.100 |         | kz0003 |                                                                             | 1.077          |       |         |
| 61     | $\gamma$ -Aminobutyric acid                                    | Organic acids  | 95    | 5.53141 | 06     | Methyl jasmonate                                                            | Organic acids  | 58    | 0.01938 |
| kz0005 |                                                                |                | 1.096 |         | kz0050 |                                                                             | 1.079          |       |         |
| 48     | Trans-3-O-p-coumaric quinic acid                               | Phenolic acids | 30    | 6.45799 | 49     | Salireposide                                                                | Phenolic acids | 73    | 0.01919 |
| kz0029 |                                                                |                | 1.085 |         | kz0008 |                                                                             | 1.078          |       |         |
| 78     | Pratensein 7-O-glucopyranoside                                 | Flavones       | 37    | 7.47812 | 31     | Diosmin                                                                     | Flavones       | 96    | 0.01520 |
| kz0022 | Farrerol 7-O-glucoside                                         | Flavanones     | 1.104 | 7.58551 | kz0052 | Neodiosmin (Diosmetin-7-O-Neohesperidoside)                                 | Flavones       | 1.074 | 0.01459 |

|        |                                                             |                |       |          |        |                                                       |                |       |         |
|--------|-------------------------------------------------------------|----------------|-------|----------|--------|-------------------------------------------------------|----------------|-------|---------|
| 02     |                                                             |                | 34    |          | 26     |                                                       | 07             |       |         |
| kz0003 |                                                             |                | 1.105 |          | kz0042 |                                                       | 1.079          |       |         |
| 04     | (±)-jasmonic acid                                           | Organic acids  | 51    | 7.75797  | 63     | Osthole                                               | Coumarins      | 77    | 0.01389 |
| kz0003 |                                                             |                | 1.095 |          | kz0038 |                                                       |                | 1.077 |         |
| 06     | Methyl jasmonate                                            | Organic acids  | 81    | 8.51744  | 29     | Quercetin 3-O-(6''-galloyl)-β-D-galactopyranoside     | Flavonols      | 03    | 0.01271 |
| kz0005 |                                                             |                | 1.103 |          | kz0016 |                                                       |                | 1.080 |         |
| 44     | 3-O-p-Coumaroyl quinic acid                                 | Phenolic acids | 76    | 9.88176  | 84     | Tetramethyluteolin (3',4',5,7-Tetramethoxyflavone)    | Flavones       | 43    | 0.01259 |
| kz0001 |                                                             |                | 1.104 |          | kz0017 |                                                       |                | 1.071 |         |
| 18     | Sakuranetin                                                 | Flavones       | 00    | 10.11972 | 39     | Quercetin-3-O-(2''-galloyl)-β-D-glucoside             | Flavonols      | 21    | 0.01231 |
| kz0001 |                                                             |                | 1.103 |          | kz0029 |                                                       |                | 1.076 |         |
| 56     | 7-O-Methyleriodictyol                                       | Flavanols      | 05    | 15.89286 | 78     | Pratensein 7-O-glucopyranoside                        | Flavones       | 25    | 0.01061 |
| kz0030 |                                                             |                | 1.104 |          | kz0019 |                                                       |                | 1.080 |         |
| 83     | 5,2'-Dihydroxy-7,8-dimethoxyflavone glycosides              | Flavones       | 38    | 29.80000 | 73     | Kaempferol-3-O-(cinnamoyl)-sophoroside-7-O-glucose    | Flavonols      | 19    | 0.01046 |
| kz0037 |                                                             |                | 1.105 |          | kz0022 |                                                       |                | 1.080 |         |
| 55     | Quercetin-3-sambubioside                                    | Flavonols      | 00    | 71.77500 | 02     | Farrerol 7-O-glucoside                                | Flavanones     | 22    | 0.00894 |
| kz0038 |                                                             |                | 1.106 |          | kz0021 |                                                       |                | 1.080 |         |
| 33     | Quercetin-O-pentosyl-O-rhamnoside-O-glucoside               | Flavonols      | 07    | 72.52500 | 97     | 2'-Hydoxy,5-methoxy Genistein-4',7-O-diglucoside      | Isoflavones    | 08    | 0.00768 |
| kz0041 |                                                             |                | 1.102 |          | kz0008 |                                                       |                | 1.076 |         |
| 72     | Quercetin 3-O-β-D-xylopyranosyl™(1→2)-β-D-galactopyranoside | Flavonols      | 91    | 97.07500 | 86     | Myricetin-3-O-arabinoside                             | Flavonols      | 60    | 0.00598 |
| kz0012 |                                                             |                | 1.100 | 214.7500 | kz0026 |                                                       |                | 1.080 |         |
| 84     | Oxaloacetic acid                                            | Organic acids  | 96    | 0        | 68     | Ovalifoliolides B                                     | Terpenoids     | 25    | 0.00569 |
| kz0005 |                                                             |                | 1.105 | 530.2500 | kz0023 |                                                       |                | 1.079 |         |
| 80     | 1,6-di-O-Galloyl-β-D-Glucose                                | Phenolic acids | 80    | 0        | 37     | Luteolin-7-O-β-D-gentiobioside                        | Flavones       | 58    | 0.00566 |
| kz0045 |                                                             |                | 1.106 | 541.5000 | kz0016 |                                                       |                | 1.080 |         |
| 98     | 1,4-di-O-galloyl-β-D-glucose                                | Phenolic acids | 10    | 0        | 95     | wogonoside                                            | Flavones       | 31    | 0.00469 |
| kz0005 |                                                             |                | 1.106 | 1082.500 | kz0035 |                                                       |                | 1.077 |         |
| 51     | methyl 6-O-galloyl-β-D-glucopyranoside                      | Phenolic acids | 29    | 00       | 04     | Geraniinic acid C                                     | Phenolic acids | 04    | 0.00446 |
| kz0028 |                                                             |                | 1.106 | 1103.500 | kz0005 |                                                       |                | 1.079 |         |
| 20     | Limocitrin 7-glucoside                                      | Flavonols      | 11    | 00       | 75     | 3,5-Di-O-galloylshikimic acid                         | Phenolic acids | 23    | 0.00414 |
| kz0036 |                                                             |                | 1.106 | 2495.000 | kz0008 |                                                       |                | 1.080 |         |
| 34     | Sinapaldehyde Glucoside                                     | Phenolic acids | 37    | 00       | 41     | Luteolin-O-sinapoylhexoside                           | Flavones       | 27    | 0.00409 |
|        |                                                             |                |       |          | kz0015 |                                                       |                | 1.078 |         |
|        |                                                             |                |       |          | 84     | Quercetin-3',4'-dimethyl ether                        | Flavonols      | 79    | 0.00400 |
|        |                                                             |                |       |          | kz0050 |                                                       |                | 1.080 |         |
|        |                                                             |                |       |          | 43     | Scopoletin?Beta-D-Glucuronide                         | Coumarins      | 32    | 0.00398 |
|        |                                                             |                |       |          | kz0013 |                                                       |                | 1.078 |         |
|        |                                                             |                |       |          | 07     | Phthalic acid                                         | Organic acids  | 19    | 0.00388 |
|        |                                                             |                |       |          | kz0029 |                                                       |                | 1.080 |         |
|        |                                                             |                |       |          | 75     | Acacetin-7-O-glucuronide                              | Flavones       | 19    | 0.00374 |
|        |                                                             |                |       |          | kz0017 |                                                       |                | 1.077 |         |
|        |                                                             |                |       |          | 40     | Quercetin-3-O-(2'',3''-digalloyl)-β-D-glucopyranoside | Flavonols      | 61    | 0.00350 |
|        |                                                             |                |       |          | kz0000 | Caffeoylagmatine                                      | Alkaloids      | 1.080 | 0.00329 |

|        |                                                                |                |       |         |
|--------|----------------------------------------------------------------|----------------|-------|---------|
| 32     |                                                                |                | 39    |         |
| kz0038 |                                                                |                | 1.080 |         |
| 72     | Lup-12-en-15 $\alpha$ ,19 $\beta$ -diol-3,11-dioxo-28-oic acid | Terpenoids     | 46    | 0.00321 |
| kz0017 |                                                                |                | 1.078 |         |
| 50     | Tercatain                                                      | Phenolic acids | 40    | 0.00314 |
| kz0031 |                                                                |                | 1.079 |         |
| 04     | Nobotanin D                                                    | Phenolic acids | 60    | 0.00309 |
| kz0006 |                                                                |                | 1.079 |         |
| 12     | 1,3,4,6-Tetra-O-Galloyl-D-Glucose                              | Phenolic acids | 91    | 0.00285 |
| kz0045 |                                                                |                | 1.077 |         |
| 95     | Geraniin                                                       | Phenolic acids | 64    | 0.00247 |
| kz0029 |                                                                |                | 1.080 |         |
| 81     | Diosmetin-7-O-glucuronide                                      | Flavones       | 19    | 0.00240 |
| kz0017 |                                                                |                | 1.080 |         |
| 26     | Prunellin A                                                    | Others         | 41    | 0.00236 |
| kz0001 |                                                                |                | 1.080 |         |
| 86     | 2-Deoxyribose 1-phosphate                                      | Others         | 29    | 0.00225 |
| km130  |                                                                |                | 1.080 |         |
| 0      | Hydroxy-methoxycinnamate                                       | Phenolic acids | 22    | 0.00210 |
| kz0022 |                                                                |                | 1.078 |         |
| 12     | Azalein (Azaleatin-3-O-rhamnoside)                             | Flavonols      | 85    | 0.00207 |
| kz0045 |                                                                |                | 1.079 |         |
| 96     | Methyl neochebulagate                                          | Others         | 44    | 0.00204 |
| kz0000 |                                                                |                | 1.080 |         |
| 64     | 1-O-Feruloyl quinic acid                                       | Phenolic acids | 04    | 0.00203 |
| kz0005 |                                                                |                | 1.080 |         |
| 52     | 4-O-Caffeoyl quinic acid (criptochlorogenic acid)              | Phenolic acids | 04    | 0.00202 |
| kz0000 |                                                                |                | 1.080 |         |
| 59     | 3-O-p-Coumaroylshikimic acid                                   | Phenolic acids | 33    | 0.00182 |
| kz0037 |                                                                |                | 1.080 |         |
| 66     | Uncargenin D                                                   | Terpenoids     | 16    | 0.00174 |
| kz0046 |                                                                |                | 1.080 |         |
| 65     | 5,7,3',4',5'-pentahydroxydihydroflavone                        | Flavanones     | 33    | 0.00172 |
| kz0010 |                                                                |                | 1.080 |         |
| 79     | Galloyl Methyl gallate                                         | Phenolic acids | 17    | 0.00169 |
| kz0002 |                                                                |                | 1.079 |         |
| 76     | 4-Aminoindole                                                  | Alkaloids      | 91    | 0.00136 |
| kz0053 |                                                                |                | 1.080 |         |
| 76     | 5'-methoxysolariciresinol-9'-O- $\beta$ -D-xylopyranoside      | Lignans        | 32    | 0.00135 |
| kz0029 |                                                                |                | 1.080 |         |
| 83     | Patuletin-3-O- $\beta$ -D-glucopyranoside                      | Flavones       | 31    | 0.00125 |
| kz0005 | 1-O-p-Coumaroyl quinic acid                                    | Phenolic acids | 1.080 | 0.00111 |

|        |                                                                |                |       |           |
|--------|----------------------------------------------------------------|----------------|-------|-----------|
| 46     |                                                                |                | 50    |           |
| kz0031 |                                                                |                | 1.080 |           |
| 06     | Cuspinin                                                       | Phenolic acids | 08    | 0.00100   |
| kz0018 |                                                                |                | 1.080 |           |
| 24     | cinnamoyltartaric acid                                         | Phenolic acids | 32    | 0.00099   |
| kz0038 |                                                                |                | 1.080 |           |
| 62     | 3 $\beta$ -Hydroxy-28-norurs-17,19,21-trien                    | Terpenoids     | 46    | 0.00094   |
| kz0018 |                                                                |                | 1.080 |           |
| 20     | benzoylmalic acid                                              | Phenolic acids | 40    | 0.00078   |
| kz0010 |                                                                |                | 1.080 |           |
| 86     | 2,3-Dihydroxy 5(6),12(13)diene ursolic acid                    | Terpenoids     | 42    | 0.00072   |
| kz0038 |                                                                |                | 1.080 |           |
| 23     | Kampferol 3-O-(2''-galloyl)- $\beta$ -D-galactopyranoside      | Flavonols      | 52    | 0.00054   |
| kz0026 |                                                                |                | 1.080 |           |
| 07     | Lariciresinol glucopyranoside                                  | Others         | 50    | 0.00053   |
| kz0011 |                                                                |                | 1.080 |           |
| 91     | 4-hydroxycoumarin di-glucoside                                 | Coumarins      | 56    | 0.00048   |
| kz0047 |                                                                |                | 1.080 |           |
| 68     | monogalloyl-diglucose                                          | Phenolic acids | 42    | 0.00039   |
| kz0005 |                                                                |                | 1.080 |           |
| 37     | 3-Galloylshikimic acid                                         | Phenolic acids | 41    | 0.00038   |
| km064  |                                                                |                | 1.080 |           |
| 0      | Hesperetin 7-rutinoside (Hesperidin)                           | Flavanones     | 24    | 0.00033   |
| kz0037 |                                                                |                | 1.080 |           |
| 48     | 7'-O-Sinapoyljasminoside L                                     | Terpenoids     | 36    | 0.00029   |
| kz0037 |                                                                |                | 1.080 |           |
| 16     | Maplexin D (2,4-Di-O-Galloyl-1,5-Anhydro-D-Glucitol)           | Phenolic acids | 45    | 0.00020   |
| kz0051 |                                                                |                | 1.080 | 1340.0000 |
| 33     | Luteolin-O-glucuronate-O-rhamnoside                            | Flavones       | 32    | 0         |
| kz0009 |                                                                |                | 1.080 | 1877.5000 |
| 19     | Robinin(Kaempferol-3-O-gal-rham-7-O-rham)                      | Flavonols      | 54    | 0         |
| kz0044 |                                                                |                | 1.080 | 1907.5000 |
| 25     | Luteolin-O-rutinoside-O-rhamnoside                             | Flavones       | 53    | 0         |
| kz0045 |                                                                |                | 1.080 | 5277.5000 |
| 98     | 1,4-di-O-galloyl- $\beta$ -D-glucose                           | Phenolic acids | 55    | 0         |
| kz0005 |                                                                |                | 1.080 | 5362.5000 |
| 80     | 1,6-Di-O-Galloyl-D-Glucose                                     | Phenolic acids | 50    | 0         |
| kz0029 |                                                                |                | 1.080 | 5390.0000 |
| 12     | Santamarin                                                     | Terpenoids     | 47    | 0         |
| kz0029 |                                                                |                | 1.080 | 7915.0000 |
| 36     | Silibinin                                                      | Flavanols      | 55    | 0         |
| kz0000 | 1'-O- $\beta$ -D-(3,4-Dihydroxyphenethyl)-O-caffeoyl-glucoside | Phenolic acids | 1.080 | 9030.0000 |

|  |  |  |  |        |                               |  |            |       |           |
|--|--|--|--|--------|-------------------------------|--|------------|-------|-----------|
|  |  |  |  | 78     |                               |  |            | 53    | 0         |
|  |  |  |  | kz0042 |                               |  |            | 1.080 | 18800.000 |
|  |  |  |  | 60     | Corosolic acid                |  | Terpenoids | 56    | 00        |
|  |  |  |  | km093  |                               |  |            | 1.080 | 155750.00 |
|  |  |  |  | 6      | Quercetin 7-O-β-D-Glucuronide |  | Flavonols  | 56    | 000       |

Table S2 Continued

| RRT-F/RSL-F |                                                                                        |                   |     |             | RSS-F/RLM-F |                                                                                        |                |       |             | RSS-F/RDP-F |                                                                                        |
|-------------|----------------------------------------------------------------------------------------|-------------------|-----|-------------|-------------|----------------------------------------------------------------------------------------|----------------|-------|-------------|-------------|----------------------------------------------------------------------------------------|
| Index       | Compounds                                                                              | Class             | VIP | Fold_Change | Index       | Compounds                                                                              | Class          | VIP   | Fold_Change | Index       | Compounds                                                                              |
| kz0046      | 7S,8R-threo-3′,9,9′-trihydroxy-3-methoxy-4′,7-epoxy-neolignan-4-O-α-L-rhamnopyranoside | Lignans           | 1.0 | 0.00001     | kz0046      | 7S,8R-threo-3′,9,9′-trihydroxy-3-methoxy-4′,7-epoxy-neolignan-4-O-α-L-rhamnopyranoside | Lignans        | 1.085 | 0.00006     | kz0050      | 7S,8R-threo-3′,9,9′-trihydroxy-3-methoxy-4′,7-epoxy-neolignan-4-O-α-L-rhamnopyranoside |
| kz0005      |                                                                                        |                   | 1.0 |             | kz0022      |                                                                                        |                | 1.085 |             | kz0046      | 7S,8R-threo-3′,9,9′-trihydroxy-3-methoxy-4′,7-epoxy-neolignan-4-O-α-L-rhamnopyranoside |
| 30          | Brevifolin carboxylic acid                                                             | Phenolic acids    | 9   | 0.00003     | 11          | Quercetin 3-O-β-D-xylopyranoside                                                       | Flavonols      | 00    | 0.00006     | 98          | rhamnocitrin                                                                           |
| kz0050      |                                                                                        |                   | 1.0 |             | kz0008      |                                                                                        |                | 1.084 |             | kz0038      | 3β-Hydroxy-28-norurs-17,19,21-trien                                                    |
| 49          | Salireposide                                                                           | Phenolic acids    | 9   | 0.00004     | 81          | Avicularin                                                                             | Flavonols      | 98    | 0.00007     | 62          | 3β-Hydroxy-28-norurs-17,19,21-trien                                                    |
| kz0007      |                                                                                        |                   | 1.0 |             | kz0005      |                                                                                        |                | 1.084 |             | kz0036      | 3β-Hydroxy-28-norurs-17,19,21-trien                                                    |
| 03          | Delphinidin-3-O-glucoside (Mirtillin)                                                  | Anthocyanins      | 9   | 0.00008     | 30          | Brevifolin carboxylic acid                                                             | Phenolic acids | 18    | 0.00021     | 34          | Sinapaldehyde Glucoside                                                                |
| kz0013      |                                                                                        | Proanthocyanidins | 1.0 |             | kz0005      |                                                                                        |                | 1.084 |             | kz0028      | 3β-Hydroxy-28-norurs-17,19,21-trien                                                    |
| 32          | Procyanidin B2                                                                         | dins              | 9   | 0.00008     | 32          | Protocatechuic acid-4-glucoside                                                        | Phenolic acids | 91    | 0.00036     | 20          | Limocitrin 7-glucoside                                                                 |
| kz0013      |                                                                                        | Proanthocyanidins | 1.0 |             | kz0038      |                                                                                        |                | 1.084 |             | kz0005      | 3β-Hydroxy-28-norurs-17,19,21-trien                                                    |
| 35          | Procyanidin B1                                                                         | dins              | 9   | 0.00010     | 62          | 3β-Hydroxy-28-norurs-17,19,21-trien                                                    | Terpenoids     | 88    | 0.00038     | 51          | Methyl 6-O-galloyl-β-D-glucopyranoside                                                 |
| kz0013      |                                                                                        | Proanthocyanidins | 1.0 |             | kz0053      |                                                                                        |                | 1.085 |             | kz0010      | 3β-Hydroxy-28-norurs-17,19,21-trien                                                    |
| 33          | Procyanidin B3                                                                         | dins              | 9   | 0.00011     | 77          | lyoniresinol-9′-O-β-D-xylopyranoside                                                   | Lignans        | 00    | 0.00039     | 86          | 2,3-Dihydroxy-5(6),12(13)diene ursolic acid                                            |
| kz0053      |                                                                                        |                   | 1.0 |             | kz0036      |                                                                                        |                | 1.084 |             | km064       | 2,3-Dihydroxy-5(6),12(13)diene ursolic acid                                            |
| 77          | lyoniresinol-9′-O-β-D-xylopyranoside                                                   | Lignans           | 9   | 0.00012     | 34          | Sinapaldehyde Glucoside                                                                | Phenolic acids | 99    | 0.00040     | 0           | Hesperetin 7-rutinoside (Hesperidin)                                                   |
| kz0037      |                                                                                        |                   | 1.0 |             | kz0000      |                                                                                        |                | 1.084 |             | kz0022      | 3β-Hydroxy-28-norurs-17,19,21-trien                                                    |
| 17          | Maplexin C (2,3-Di-O-Galloyl-1,5-Anhydro-D-Glucitol)                                   | Phenolic acids    | 9   | 0.00016     | 59          | 3-O-p-Coumaroylshikimic acid                                                           | Phenolic acids | 95    | 0.00062     | 02          | Farnesol                                                                               |
| kz0037      |                                                                                        |                   | 1.0 |             | kz0000      |                                                                                        |                | 1.084 |             | kz0011      | 3β-Hydroxy-28-norurs-17,19,21-trien                                                    |
| 16          | Maplexin D (2,4-Di-O-Galloyl-1,5-Anhydro-D-Glucitol)                                   | Phenolic acids    | 9   | 0.00020     | 64          | 1-O-Feruloyl quinic acid                                                               | Phenolic acids | 92    | 0.00063     | 77          | Sinapaldehyde Glucoside                                                                |
| kz0007      |                                                                                        |                   | 1.0 |             | kz0037      |                                                                                        |                | 1.084 |             | km081       | 3β-Hydroxy-28-norurs-17,19,21-trien                                                    |
| 04          | Cyanidin-O-syringic acid                                                               | Anthocyanins      | 9   | 0.00025     | 66          | Uncargenin D                                                                           | Terpenoids     | 98    | 0.00088     | 8           | Myricetin 3-O-rhamnoside (Myricitrin)                                                  |
| km064       |                                                                                        |                   | 1.0 |             | kz0037      |                                                                                        |                | 1.084 |             | kz0018      | 3β-Hydroxy-28-norurs-17,19,21-trien                                                    |
| 0           | Hesperetin 7-rutinoside (Hesperidin)                                                   | Flavanones        | 9   | 0.00033     | 17          | Maplexin C (2,3-Di-O-Galloyl-1,5-Anhydro-D-Glucitol)                                   | Phenolic acids | 63    | 0.00089     | 24          | cinnamoylshikimic acid                                                                 |
| kz0047      |                                                                                        |                   | 1.0 |             | kz0028      |                                                                                        |                | 1.084 |             | kz0037      | 3β-Hydroxy-28-norurs-17,19,21-trien                                                    |
| 68          | monogalloyl-digluco                                                                    | Phenolic acids    | 9   | 0.00039     | 20          | Limocitrin 7-glucoside                                                                 | Flavonols      | 79    | 0.00091     | 94          | Syringic acid                                                                          |
| km081       |                                                                                        |                   | 1.0 |             | kz0011      |                                                                                        |                | 1.084 |             | kz0003      | 3β-Hydroxy-28-norurs-17,19,21-trien                                                    |
| 8           | Myricetin 3-O-rhamnoside (Myricitrin)                                                  | Flavonols         | 9   | 0.00044     | 91          | 4-hydroxycoumarin di-glucoside                                                         | Coumarins      | 95    | 0.00092     | 06          | Methyl 6-O-galloyl-β-D-glucopyranoside                                                 |
| kz0011      |                                                                                        |                   | 1.0 |             | kz0005      |                                                                                        |                | 1.084 |             | kz0022      | 3β-Hydroxy-28-norurs-17,19,21-trien                                                    |
| 91          | 4-hydroxycoumarin di-glucoside                                                         | Coumarins         | 9   | 0.00048     | 51          | Methyl 6-O-galloyl-β-D-glucopyranoside                                                 | Phenolic acids | 93    | 0.00092     | 12          | Azelaic acid                                                                           |
| kz0005      |                                                                                        |                   | 1.0 |             | kz0010      |                                                                                        |                | 1.084 |             | kz0002      | 3β-Hydroxy-28-norurs-17,19,21-trien                                                    |
| 53          | Neochlorogenic acid(5-O-Caffeoylquinic acid)                                           | Phenolic acids    | 9   | 0.00048     | 86          | 2,3-Dihydroxy 5(6),12(13)diene ursolic acid                                            | Terpenoids     | 96    | 0.00101     | 76          | 4-Acetylshikimic acid                                                                  |
| kz0031      | Clemaphenol A                                                                          | Lignans           | 1.0 | 0.00053     | kz0038      | Lup-12-en-15α,19β-diol-3,11-dioxo-28-oic acid                                          | Terpenoids     | 1.085 | 0.00102     | kz0017      | Prunellin                                                                              |

|        |                                                    |                |     |         |        |                                                      |                |       |         |        |      |
|--------|----------------------------------------------------|----------------|-----|---------|--------|------------------------------------------------------|----------------|-------|---------|--------|------|
| 47     |                                                    |                | 9   |         | 72     |                                                      |                | 00    |         | 26     |      |
| kz0038 |                                                    |                | 1.0 |         | km064  |                                                      |                | 1.084 |         | kz0053 |      |
| 23     | Kampferol 3-O-(2''-galloyl)-β-D-galactopyranoside  | Flavonols      | 9   | 0.00054 | 0      | Hesperetin 7-rutinoside (Hesperidin)                 | Flavanones     | 95    | 0.00110 | 76     | 5'-n |
| kz0005 |                                                    |                | 1.0 |         | kz0005 |                                                      |                | 1.084 |         | kz0041 |      |
| 55     | 1-Caffeoylquinic acid                              | Phenolic acids | 9   | 0.00061 | 46     | 1-O-p-Coumaroyl quinic acid                          | Phenolic acids | 85    | 0.00110 | 72     | Que  |
| kz0038 |                                                    |                | 1.0 |         | kz0026 |                                                      |                | 1.084 |         | kz0003 |      |
| 21     | Kampferol 3-O-(6''-galloyl)-β-D-galactopyranoside  | Flavonols      | 9   | 0.00061 | 07     | Lariciresinol glucopyranoside                        | Others         | 81    | 0.00118 | 04     | (±)- |
| kz0036 |                                                    |                | 1.0 |         | kz0022 |                                                      |                | 1.084 |         | kz0038 |      |
| 36     | Plantainoside A                                    | Phenolic acids | 9   | 0.00072 | 02     | Farrerol 7-O-glucoside                               | Flavanones     | 99    | 0.00118 | 33     | Que  |
| kz0018 |                                                    |                | 1.0 |         | kz0050 |                                                      |                | 1.084 |         | kz0004 |      |
| 20     | benzoylmalic acid                                  | Phenolic acids | 9   | 0.00078 | 43     | Scopoletin?Beta-D-Glucuronide                        | Coumarins      | 98    | 0.00120 | 79     | Cinn |
| kz0038 |                                                    |                | 1.0 |         | kz0029 |                                                      |                | 1.084 |         | kz0052 |      |
| 62     | 3β-Hydroxy-28-norurs-17,19,21-trien                | Terpenoids     | 9   | 0.00094 | 78     | Pratensein 7-O-glucopyranoside                       | Flavones       | 97    | 0.00142 | 26     | Nec  |
| kz0018 |                                                    |                | 1.0 |         | kz0001 |                                                      |                | 1.084 |         | kz0008 |      |
| 24     | cinnamoyltartaric acid                             | Phenolic acids | 9   | 0.00099 | 86     | 2-Deoxyribose 1-phosphate                            | Others         | 93    | 0.00143 | 30     | Chr  |
| kz0031 |                                                    |                | 1.0 |         | kz0038 |                                                      |                | 1.084 |         | kz0008 |      |
| 06     | Cuspinin                                           | Phenolic acids | 9   | 0.00100 | 23     | Kampferol 3-O-(2''-galloyl)-β-D-galactopyranoside    | Flavonols      | 68    | 0.00150 | 31     | Dio  |
| kz0005 |                                                    |                | 1.0 |         | kz0037 |                                                      |                | 1.084 |         | kz0047 |      |
| 46     | 1-O-p-Coumaroyl quinic acid                        | Phenolic acids | 9   | 0.00111 | 16     | Maplexin D (2,4-Di-O-Galloyl-1,5-Anhydro-D-Glucitol) | Phenolic acids | 31    | 0.00156 | 74     | (2R) |
| kz0029 |                                                    |                | 1.0 |         | kz0020 |                                                      |                | 1.083 |         | kz0003 |      |
| 83     | Patuletin-3-O-β-D-glucopyranoside                  | Flavones       | 9   | 0.00125 | 63     | Galloyl-HHDP(Hexahydroxydiphenoyl)-glueopy ranose    | Phenolic acids | 39    | 0.00165 | 08     | N-[( |
| kz0013 |                                                    | Proanthocyani  | 1.0 |         | kz0018 |                                                      |                | 1.084 |         | kz0029 |      |
| 40     | Procyanidin C2                                     | dins           | 9   | 0.00128 | 24     | cinnamoyltartaric acid                               | Phenolic acids | 90    | 0.00168 | 78     | Prat |
| kz0047 |                                                    |                | 1.0 |         | kz0031 |                                                      |                | 1.083 |         | kz0011 |      |
| 74     | (2R)-Pinocembrin-7-neohesperidoside                | Flavanones     | 9   | 0.00134 | 03     | Gemin D                                              | Phenolic acids | 25    | 0.00170 | 91     | 4-hy |
| kz0053 |                                                    |                | 1.0 |         | kz0010 |                                                      |                | 1.084 |         | kz0042 |      |
| 76     | 5'-methoxyisolariciresinol-9'-O-β-D-xylopyranoside | Lignans        | 9   | 0.00135 | 79     | Galloyl Methyl gallate                               | Phenolic acids | 99    | 0.00178 | 31     | Isot |
| kz0002 |                                                    |                | 1.0 |         | kz0021 |                                                      |                | 1.084 |         | kz0042 |      |
| 76     | 4-Aminoindole                                      | Alkaloids      | 9   | 0.00136 | 97     | 2'-Hydoxy,5-methoxy Genistein-4',7-O-diglucoside     | Isoflavones    | 84    | 0.00184 | 33     | Terr |
| kz0025 |                                                    |                | 1.0 |         | kz0001 |                                                      |                | 1.084 |         | kz0038 |      |
| 57     | 4-O-glucosyl-3,4-dihydroxybenzyl alcohol           | Phenolic acids | 9   | 0.00144 | 56     | 7-O-Methyleriodictyol                                | Flavanols      | 94    | 0.00204 | 72     | Lup  |
| kz0025 |                                                    |                | 1.0 |         | km130  |                                                      |                | 1.084 |         | kz0001 |      |
| 51     | Isosinapic acid-hexoside                           | Phenolic acids | 9   | 0.00163 | 0      | Hydroxy-methoxycinnamate                             | Phenolic acids | 98    | 0.00213 | 56     | 7-O  |
| kz0023 |                                                    |                | 1.0 |         | kz0003 |                                                      |                | 1.084 |         | kz0000 |      |
| 67     | Methyl dioxindole-3-acetate                        | Others         | 9   | 0.00166 | 06     | Methyl jasmonate                                     | Organic acids  | 99    | 0.00228 | 64     | 1-O  |
| kz0046 |                                                    |                | 1.0 |         | kz0022 |                                                      |                | 1.084 |         | kz0050 |      |
| 65     | 5,7,3',4',5'-pentahydroxydihydroflavone            | Flavanones     | 9   | 0.00172 | 12     | Azalein (Azaleatin-3-O-rhamnoside)                   | Flavonols      | 38    | 0.00261 | 43     | Sco  |
| kz0009 |                                                    |                | 1.0 |         | kz0037 |                                                      |                | 1.084 |         | kz0052 |      |
| 74     | Gallocatechin                                      | Flavanols      | 9   | 0.00187 | 48     | 7'-O-Sinapoyljasminoside L                           | Terpenoids     | 70    | 0.00275 | 47     | Lim  |
| kz0033 |                                                    |                | 1.0 |         | kz0002 |                                                      |                | 1.084 |         | kz0046 |      |
| 70     | Swertiamarin                                       | Terpenoids     | 9   | 0.00191 | 76     | 4-Aminoindole                                        | Alkaloids      | 13    | 0.00276 | 32     | isoc |
| kz0005 | 4-O-Caffeoyl quinic acid (criptochlorogenic acid)  | Phenolic acids | 1.0 | 0.00202 | kz0001 | Sakuranetin                                          | Flavones       | 1.084 | 0.00278 | kz0012 | γ-Ar |



|        |                                              |                |     |         |        |                                                       |                |       |         |        |       |
|--------|----------------------------------------------|----------------|-----|---------|--------|-------------------------------------------------------|----------------|-------|---------|--------|-------|
| 52     |                                              |                | 9   |         | 18     |                                                       |                | 99    |         | 61     |       |
| kz0045 |                                              |                | 1.0 |         | kz0006 |                                                       |                | 1.084 |         | kz0031 |       |
| 96     | Methyl neochebulagate                        | Others         | 9   | 0.00204 | 12     | 1,3,4,6-Tetra-O-Galloyl-D-Glucose                     | Phenolic acids | 12    | 0.00321 | 66     | 6-H   |
| kz0022 |                                              |                | 1.0 |         | kz0017 |                                                       |                | 1.084 |         | kz0012 |       |
| 12     | Azalein (Azaleatin-3-O-rhamnoside)           | Flavonols      | 9   | 0.00207 | 26     | Prunellin A                                           | Others         | 12    | 0.00370 | 97     | (Rs)  |
| kz0037 |                                              |                | 1.0 |         | kz0005 |                                                       |                | 1.084 |         | kz0013 |       |
| 94     | Syringic Aldehyde-glucoside                  | Phenolic acids | 9   | 0.00208 | 36     | 5-Galloylshikimic acid                                | Phenolic acids | 84    | 0.00372 | 18     | Qui   |
| kz0000 |                                              |                | 1.0 |         | kz0042 |                                                       |                | 1.084 |         | kz0029 |       |
| 50     | Homogentisic acid                            | Phenolic acids | 9   | 0.00214 | 63     | Osthole                                               | Coumarins      | 88    | 0.00480 | 10     | Part  |
| kz0001 |                                              |                | 1.0 |         | kz0026 |                                                       |                | 1.084 |         | kz0000 |       |
| 86     | 2-Deoxyribose 1-phosphate                    | Others         | 9   | 0.00225 | 68     | Ovalifoliolides B                                     | Terpenoids     | 94    | 0.00597 | 59     | 3-O   |
| kz0017 |                                              |                | 1.0 |         | kz0053 |                                                       |                | 1.083 |         | kz0026 |       |
| 26     | Prunellin A                                  | Others         | 9   | 0.00236 | 76     | 5'-methoxyisolariciresinol-9'-O-β-D-xylopyranoside    | Lignans        | 83    | 0.00624 | 68     | Ova   |
| kz0029 |                                              |                | 1.0 |         | kz0017 |                                                       |                | 1.082 |         | kz0042 |       |
| 81     | Diosmetin-7-O-glucuronide                    | Flavones       | 9   | 0.00240 | 40     | Quercetin-3-O-(2'',3''-digalloyl)-β-D-glucopyranoside | Flavonols      | 97    | 0.00730 | 63     | Ost   |
| kz0005 |                                              |                | 1.0 |         | kz0046 |                                                       |                | 1.083 |         | kz0012 |       |
| 92     | Rosmarinyl Glucoside                         | Phenolic acids | 9   | 0.00267 | 65     | 5,7,3',4',5'-pentahydroxydihydroflavone               | Flavanones     | 98    | 0.00760 | 81     | Citr  |
| kz0006 |                                              |                | 1.0 |         | kz0005 |                                                       |                | 1.076 |         | kz0002 |       |
| 12     | 1,3,4,6-Tetra-O-Galloyl-D-Glucose            | Phenolic acids | 9   | 0.00285 | 52     | 4-O-Caffeoyl quinic acid (criptochlorogenic acid)     | Phenolic acids | 88    | 0.00774 | 32     | O-P   |
| kz0031 |                                              |                | 1.0 |         | kz0031 |                                                       |                | 1.083 |         | kz0037 |       |
| 04     | Nobotanin D                                  | Phenolic acids | 9   | 0.00309 | 06     | Cuspinin                                              | Phenolic acids | 92    | 0.00787 | 19     | Met   |
| kz0013 |                                              | Proanthocyani  | 1.0 |         | kz0029 |                                                       |                | 1.084 |         | kz0053 |       |
| 31     | Procyanidin A1                               | dins           | 9   | 0.00311 | 60     | Eupatilin                                             | Flavones       | 90    | 0.00806 | 77     | lyon  |
| kz0009 |                                              |                | 1.0 |         | kz0000 |                                                       |                | 1.083 |         | kz0001 |       |
| 73     | Epigallocatechin (EGC)                       | Flavanols      | 9   | 0.00312 | 32     | Caffeoylagmatine                                      | Alkaloids      | 56    | 0.00833 | 18     | Sak   |
| kz0017 |                                              |                | 1.0 |         | kz0029 |                                                       |                | 1.084 |         | kz0030 |       |
| 50     | Tercatain                                    | Phenolic acids | 9   | 0.00314 | 62     | Penduletin (5,4'-Dihydroxy-3,6,7-trimethoxyflavone)   | Flavones       | 99    | 0.01016 | 99     | Di-C  |
| kz0000 |                                              |                | 1.0 |         | kz0023 |                                                       |                | 1.077 |         | kz0024 |       |
| 32     | Caffeoylagmatine                             | Alkaloids      | 9   | 0.00329 | 37     | Luteolin-7-O-β-D-gentiobioside                        | Flavones       | 24    | 0.01253 | 19     | Erg   |
| kz0029 |                                              |                | 1.0 |         | kz0005 |                                                       |                | 1.084 |         | kz0002 |       |
| 75     | Acacetin-7-O-glucuronide                     | Flavones       | 9   | 0.00374 | 37     | 3-Galloylshikimic acid                                | Phenolic acids | 09    | 0.01461 | 74     | N-si  |
| kz0015 |                                              |                | 1.0 |         | kz0015 |                                                       |                | 1.083 |         | kz0001 |       |
| 84     | Quercetin-3',4'-dimethyl ether               | Flavonols      | 9   | 0.00400 | 84     | Quercetin-3',4'-dimethyl ether                        | Flavonols      | 30    | 0.01563 | 45     | For   |
| kz0005 |                                              |                | 1.0 |         | kz0016 |                                                       |                | 1.084 |         | kz0040 |       |
| 75     | 3,5-Di-O-galloylshikimic acid                | Phenolic acids | 9   | 0.00414 | 95     | wogonoside                                            | Flavones       | 56    | 0.01604 | 13     | Sola  |
| kz0047 |                                              |                | 1.0 |         | kz0003 |                                                       |                | 1.084 |         | kz0038 |       |
| 03     | secoisolariciresinol 9-O-β-D-glucopyranoside | Lignans        | 9   | 0.00456 | 04     | (±)-jasmonic acid                                     | Organic acids  | 48    | 0.01625 | 54     | Ros   |
| kz0016 |                                              |                | 1.0 |         | kz0046 |                                                       |                | 1.084 |         | kz0047 | 2-H   |
| 95     | wogonoside                                   | Flavones       | 9   | 0.00469 | 32     | isoceanothic acid                                     | Terpenoids     | 91    | 0.02082 | 62     | (trin |
| kz0026 |                                              |                | 1.0 |         | kz0008 |                                                       |                | 1.084 |         | kz0025 |       |
| 68     | Ovalifoliolides B                            | Terpenoids     | 9   | 0.00569 | 41     | Luteolin-O-sinapoylhexoside                           | Flavones       | 66    | 0.02427 | 51     | Isos  |
| kz0038 | Sieboldin                                    | Chalcones      | 1.0 | 0.00802 | kz0019 | Kaempferol-3-O-(cinnamoyl)-sophoroside-7-O-glucose    | Flavonols      | 1.084 | 0.02644 | kz0010 | 4-M   |

|        |                                                                             |                |     |         |        |                                                           |                |       |         |        |      |
|--------|-----------------------------------------------------------------------------|----------------|-----|---------|--------|-----------------------------------------------------------|----------------|-------|---------|--------|------|
| 09     |                                                                             |                | 9   |         | 73     |                                                           |                | 12    |         | 20     |      |
| kz0009 |                                                                             |                | 1.0 |         | kz0050 |                                                           |                | 1.083 |         | kz0010 |      |
| 71     | Catechin                                                                    | Flavanols      | 9   | 0.00859 | 49     | Salireposide                                              | Phenolic acids | 94    | 0.02783 | 93     | Ole  |
| kz0022 |                                                                             |                | 1.0 |         | kz0001 |                                                           |                | 1.078 |         | kz0009 |      |
| 02     | Farrerol 7-O-glucoside                                                      | Flavanones     | 9   | 0.00894 | 97     | E-3,4,5'-Trihydroxy-3'-glucopyranosylstilbene             | Others         | 77    | 0.02899 | 78     | Cate |
| kz0038 |                                                                             |                | 1.0 |         | kz0008 |                                                           |                | 1.083 |         | kz0010 |      |
| 48     | Cinchonain Ic                                                               | Flavanols      | 9   | 0.00946 | 31     | Diosmin                                                   | Flavones       | 19    | 0.03183 | 91     | Eus  |
| kz0047 |                                                                             |                | 1.0 |         | kz0052 |                                                           |                | 1.075 |         | kz0009 |      |
| 71     | Epicatechin glucoside                                                       | Flavanols      | 9   | 0.01045 | 26     | Neodiosmin (Diosmetin-7-O-Neohesperidoside)               | Flavones       | 86    | 0.03236 | 79     | Cate |
| kz0029 |                                                                             |                | 1.0 |         | kz0030 |                                                           |                | 1.083 |         | kz0038 |      |
| 78     | Pratensein 7-O-glucopyranoside                                              | Flavones       | 9   | 0.01061 | 83     | 5,2'-Dihydroxy-7,8-dimethoxyflavone glycosides            | Flavones       | 32    | 0.03356 | 63     | San  |
| kz0004 |                                                                             |                | 1.0 |         | kz0008 |                                                           |                | 1.080 |         | kz0004 |      |
| 19     | Phlorizin                                                                   | Chalcones      | 9   | 0.01107 | 30     | Chrysoeriol-7-O-rutinoside                                | Flavones       | 56    | 0.03441 | 14     | 2-PI |
| kz0009 |                                                                             |                | 1.0 |         | kz0005 |                                                           |                | 1.082 |         | kz0009 |      |
| 79     | Catechin-(7,8-bc)-4 $\alpha$ -(3,4-dihydroxyphenyl)-dihydro-2-(3H)-pyranone | Flavanols      | 9   | 0.01247 | 44     | 3-O-p-Coumaroyl quinic acid                               | Phenolic acids | 43    | 0.03590 | 11     | Que  |
| kz0016 |                                                                             |                | 1.0 |         | kz0017 |                                                           |                | 1.069 |         | kz0005 |      |
| 84     | Tetramethyluteolin (3',4',5,7-Tetramethoxyflavone)                          | Flavones       | 9   | 0.01259 | 39     | Quercetin-3-O-(2''-galloyl)- $\beta$ -D-glucoside         | Flavonols      | 17    | 0.03650 | 22     | Met  |
| kz0009 |                                                                             |                | 1.0 |         | kz0038 |                                                           |                | 1.078 |         | kz0005 |      |
| 78     | Catechin-(7,8-bc)-4 $\beta$ -(3,4-dihydroxyphenyl)-dihydro-2-(3H)-pyranone  | Flavanols      | 9   | 0.01272 | 29     | Quercetin 3-O-(6''-galloyl)- $\beta$ -D-galactopyranoside | Flavonols      | 97    | 0.03681 | 39     | 3-H  |
| kz0052 |                                                                             |                | 1.0 |         | kz0003 |                                                           |                | 1.084 |         | kz0009 |      |
| 26     | Neodiosmin (Diosmetin-7-O-Neohesperidoside)                                 | Flavones       | 9   | 0.01281 | 08     | N-[(-)-Jasmonoyl]-(L)-Isoleucine (JA-L-Ile)               | Organic acids  | 55    | 0.03949 | 08     | Que  |
| kz0009 |                                                                             |                | 1.0 |         | kz0005 |                                                           |                | 1.083 |         | kz0005 |      |
| 69     | Afzelechin(3,5,7,4'-Tetrahydroxyflavan)                                     | Flavanols      | 9   | 0.01380 | 48     | Trans-3-O-p-coumaric quinic acid                          | Phenolic acids | 67    | 0.03958 | 67     | Dita |
| kz0008 |                                                                             |                | 1.0 |         | kz0042 |                                                           |                | 1.083 |         | kz0016 |      |
| 31     | Diosmin                                                                     | Flavones       | 9   | 0.01422 | 31     | Isothankunic acid                                         | Terpenoids     | 60    | 0.05135 | 95     | wog  |
| km043  |                                                                             |                | 1.0 |         | kz0009 |                                                           |                | 1.083 |         | kz0034 |      |
| 6      | Afzelechin (3,5,7,4'-Tetrahydroxyflavan)                                    | Flavanones     | 9   | 0.01662 | 97     | Terpineol monO-glucoside                                  | Lignans        | 44    | 0.05259 | 98     | 2-O  |
| kz0003 |                                                                             |                | 1.0 |         | kz0037 |                                                           |                | 1.078 |         | kz0050 |      |
| 06     | Methyl jasmonate                                                            | Organic acids  | 9   | 0.01938 | 67     | Obtusilin                                                 | Terpenoids     | 29    | 0.05416 | 54     | Chr  |
| kz0029 |                                                                             |                | 1.0 |         | kz0004 |                                                           |                | 1.082 |         | kz0013 |      |
| 60     | Eupatilin                                                                   | Flavones       | 9   | 0.01979 | 40     | Astilbin                                                  | Flavanols      | 68    | 0.06103 | 12     | Shik |
| kz0038 |                                                                             |                | 1.0 |         | kz0010 |                                                           |                | 1.084 |         | kz0003 |      |
| 29     | Quercetin 3-O-(6''-galloyl)- $\beta$ -D-galactopyranoside                   | Flavonols      | 9   | 0.02233 | 90     | Methoxyursolic acid                                       | Terpenoids     | 55    | 0.06384 | 12     | A-K  |
| kz0017 |                                                                             |                | 1.0 |         | kz0051 |                                                           |                | 1.083 |         | kz0005 |      |
| 39     | Quercetin-3-O-(2''-galloyl)- $\beta$ -D-glucoside                           | Flavonols      | 8   | 0.02245 | 36     | Camaldulenic acid                                         | Terpenoids     | 92    | 0.06751 | 42     | 1-O  |
| kz0037 |                                                                             |                | 1.0 |         | kz0022 |                                                           |                | 1.068 |         | kz0001 |      |
| 19     | Methyl 4,6-di-O-galloyl-D-glucoside                                         | Phenolic acids | 8   | 0.02424 | 21     | Eucommin A                                                | Lignans        | 60    | 0.07532 | 21     | Chr  |
| kz0000 |                                                                             |                | 1.0 |         | kz0004 |                                                           |                | 1.084 |         | kz0010 |      |
| 40     | N,N'-Bis(Sinapoyl)Spermidine                                                | Alkaloids      | 9   | 0.02434 | 79     | Cinnamic acid                                             | Phenolic acids | 56    | 0.07777 | 41     | N-A  |
| kz0008 |                                                                             |                | 1.0 |         | kz0051 |                                                           |                | 1.084 |         | kz0005 |      |
| 30     | Chrysoeriol-7-O-rutinoside                                                  | Flavones       | 9   | 0.02440 | 87     | Dunalianoside B                                           | Phenolic acids | 06    | 0.07983 | 20     | Sina |
| kz0037 | 7'-O-Sinapoyljasminoside L                                                  | Terpenoids     | 1.0 | 0.02606 | kz0035 | Dihydrokaempferol-7-O-glucoside                           | Flavonols      | 1.083 | 0.08126 | kz0004 | But  |

|        |                                                       |                |     |         |        |                                                                                      |                |       |         |        |      |
|--------|-------------------------------------------------------|----------------|-----|---------|--------|--------------------------------------------------------------------------------------|----------------|-------|---------|--------|------|
| 48     |                                                       |                | 9   |         | 40     |                                                                                      | 68             |       | 22      |        |      |
| kz0038 |                                                       |                | 1.0 |         | kz0038 |                                                                                      | 1.082          |       | kz0004  |        |      |
| 12     | Isorhamnetin O-malonylglucoside                       | Flavonols      | 9   | 0.02628 | 48     | Cinchonain Ic                                                                        | Flavanols      | 88    | 0.08136 | 34     | Pino |
| kz0053 |                                                       |                | 1.0 |         | km129  |                                                                                      | 1.083          |       | km084   |        |      |
| 89     | Byzantionoside A                                      | Others         | 9   | 0.02692 | 3      | Hesperetin O-malonylhexoside                                                         | Flavanones     | 13    | 0.08775 | 9      | Nar  |
| kz0029 |                                                       |                | 1.0 |         | kz0026 |                                                                                      | 1.084          |       | kz0011  |        |      |
| 62     | Penduletin (5,4'-Dihydroxy-3,6,7-trimethoxyflavone)   | Flavones       | 9   | 0.02909 | 73     | Eriodictyol-O-glucoside                                                              | Flavones       | 32    | 0.08934 | 03     | 6-H  |
| kz0001 |                                                       |                | 1.0 |         | kz0046 |                                                                                      | 1.050          |       | kz0051  |        |      |
| 56     | 7-O-Methyleriodictyol                                 | Flavanols      | 9   | 0.03247 | 30     | 2 $\alpha$ -hydroxyursolic acid                                                      | Terpenoids     | 91    | 0.09062 | 36     | Can  |
| kz0042 |                                                       |                | 1.0 |         | kz0012 |                                                                                      | 1.082          |       | kz0046  |        |      |
| 31     | Isothankunic acid                                     | Terpenoids     | 9   | 0.03259 | 97     | (Rs)-Mevalonic acid                                                                  | Organic acids  | 07    | 0.09556 | 97     | Taxi |
| kz0005 |                                                       |                | 1.0 |         | kz0001 |                                                                                      | 1.083          |       | kz0010  |        |      |
| 36     | 5-Galloylshikimic acid                                | Phenolic acids | 9   | 0.03507 | 45     | Formononetin                                                                         | Isoflavones    | 97    | 0.09586 | 32     | N-A  |
| kz0005 |                                                       |                | 1.0 |         | kz0009 |                                                                                      | 1.084          |       | kz0038  |        |      |
| 37     | 3-Galloylshikimic acid                                | Phenolic acids | 9   | 0.04409 | 78     | Catechin-(7,8-bc)-4 $\beta$ -(3,4-dihydroxyphenyl)-dihydro-2-(3H)-pyranone           | Flavanols      | 93    | 0.10283 | 12     | Ison |
| kz0035 |                                                       |                | 1.0 |         | kz0009 |                                                                                      | 1.084          |       | kz0008  |        |      |
| 19     | Cimidahurinine                                        | Phenolic acids | 9   | 0.04974 | 79     | Catechin-(7,8-bc)-4 $\alpha$ -(3,4-dihydroxyphenyl)-dihydro-2-(3H)-pyranone          | Flavanols      | 39    | 0.10763 | 89     | Spir |
| kz0047 |                                                       |                | 1.0 |         | kz0042 |                                                                                      | 1.082          |       | kz0008  |        |      |
| 38     | 4,7,9,9'-Tetrahydroxy-3,3'-dimethoxy-8-O-4'-neolignan | Others         | 9   | 0.05055 | 33     | Terminolic acid                                                                      | Terpenoids     | 17    | 0.10813 | 88     | Que  |
| kz0000 |                                                       |                | 1.0 |         | kz0012 |                                                                                      | 1.083          |       | kz0005  |        |      |
| 58     | Protocatechuic acid O-glucoside                       | Phenolic acids | 9   | 0.05189 | 81     | Citraconic acid                                                                      | Organic acids  | 12    | 0.10841 | 84     | 5-O  |
| kz0010 |                                                       |                | 1.0 |         | kz0012 |                                                                                      | 1.080          |       | km084   |        |      |
| 74     | Gallic acid                                           | Phenolic acids | 9   | 0.05321 | 87     | (S)-(-)-2-Hydroxyisocaproic acid                                                     | Organic acids  | 20    | 0.12064 | 3      | Nar  |
| km053  |                                                       |                | 1.0 |         | kz0010 |                                                                                      | 1.081          |       | kz0005  |        |      |
| 2      | Delphinidin 3-O-glucoside (Mirtillin)                 | Anthocyanins   | 7   | 0.05463 | 93     | Oleanolic acid 2-O- $\beta$ -D-glucopyranoside                                       | Terpenoids     | 99    | 0.12643 | 14     | 3,4- |
| kz0030 |                                                       |                | 1.0 |         | kz0047 |                                                                                      | 1.084          |       | kz0030  |        |      |
| 99     | Di-O-Glucose-quinic acid                              | Phenolic acids | 9   | 0.05597 | 62     | 2-Hydroxy-5,8,11,14,17-icosapentaenoyloxy]propyl-2-(trimethylammonio)ethyl phosphate | Alkaloids      | 27    | 0.12904 | 38     | 3-O  |
| kz0029 |                                                       |                | 1.0 |         | kz0037 |                                                                                      | 1.072          |       | kz0023  |        |      |
| 10     | Parthenolide                                          | Terpenoids     | 9   | 0.06178 | 20     | Maplexin H                                                                           | Phenolic acids | 95    | 0.14063 | 67     | Met  |
| kz0035 |                                                       |                | 1.0 |         | kz0011 |                                                                                      | 1.084          |       | kz0038  |        |      |
| 18     | 5-(2-Hydroxyethyl)-2-O-glucosylohenol                 | Phenolic acids | 9   | 0.06180 | 01     | Trigonelline                                                                         | Alkaloids      | 35    | 0.14334 | 11     | Kae  |
| kz0010 |                                                       |                | 1.0 |         | kz0012 |                                                                                      | 1.081          |       | kz0008  |        |      |
| 86     | 2,3-Dihydroxy 5(6),12(13)diene ursolic acid           | Terpenoids     | 9   | 0.07097 | 61     | $\gamma$ -Aminobutyric acid                                                          | Organic acids  | 15    | 0.14469 | 00     | Chr  |
| km111  |                                                       |                | 1.0 |         | kz0004 |                                                                                      | 1.083          |       | km130   |        |      |
| 3      | 5-O-p-Coumaroyl shikimic acid                         | Phenolic acids | 8   | 0.07658 | 89     | Protocatechuic acid                                                                  | Phenolic acids | 93    | 0.16372 | 0      | Hyd  |
| kz0015 |                                                       |                | 1.0 |         | kz0005 |                                                                                      | 1.082          |       | kz0004  |        |      |
| 81     | Calceorioside B                                       | Others         | 8   | 0.08463 | 54     | Chlorogenic acid                                                                     | Phenolic acids | 81    | 0.16377 | 41     | Hes  |
| kz0053 |                                                       |                | 1.0 |         | kz0013 |                                                                                      | 1.083          |       | kz0047  |        |      |
| 73     | Lyoniresinol                                          | Lignans        | 8   | 0.08532 | 02     | 2,3-Dihydroxybenzoic Acid                                                            | Organic acids  | 85    | 0.16790 | 35     | Ligr |
| kz0050 |                                                       |                | 1.0 |         | kz0038 |                                                                                      | 1.064          |       | kz0013  |        |      |
| 88     | Tricetin-4'-methyl-ether-3'-O- $\beta$ -D-glucoside   | Flavonols      | 9   | 0.08551 | 21     | Kampferol 3-O-(6''-galloyl)- $\beta$ -D-galactopyranoside                            | Flavonols      | 30    | 0.16836 | 32     | Pro  |
| kz0053 | (+)-Isolariciresinol                                  | Lignans        | 1.0 | 0.08581 | kz0029 | Parthenolide                                                                         | Terpenoids     | 1.083 | 0.17233 | kz0031 | mly  |

|        |                                                           |                |     |         |        |                                                    |                |       |         |        |      |
|--------|-----------------------------------------------------------|----------------|-----|---------|--------|----------------------------------------------------|----------------|-------|---------|--------|------|
| 70     |                                                           |                | 9   |         | 10     |                                                    |                | 97    |         | 08     |      |
| kz0004 |                                                           |                | 1.0 |         | kz0002 |                                                    |                | 1.082 |         | kz0053 |      |
| 40     | Astilbin                                                  | Flavanols      | 9   | 0.08687 | 94     | 2-Hydroxyisocaproic acid                           | Organic acids  | 69    | 0.17338 | 85     | Ma   |
| kz0011 |                                                           |                | 1.0 |         | kz0004 |                                                    |                | 1.076 |         | km022  |      |
| 00     | Nicotinic Acid Methyl Ester(Methyl Nicotinate)            | Alkaloids      | 9   | 0.08790 | 95     | 3-(4-Hydroxyphenyl)-propionic acid                 | Phenolic acids | 23    | 0.17585 | 8      | Que  |
| kz0041 |                                                           |                | 1.0 |         | kz0040 |                                                    |                | 1.073 |         | kz0022 |      |
| 70     | Rhamnetin 3-O-β-D-Glucoside                               | Flavonols      | 9   | 0.09070 | 13     | Solatuberenol A                                    | Others         | 22    | 0.17597 | 14     | isoH |
| km130  |                                                           |                | 1.0 |         | km032  |                                                    |                | 1.079 |         | kz0008 |      |
| 7      | Isorhamnetin 5-O-hexoside                                 | Flavonols      | 9   | 0.09278 | 9      | 3-(4-Hydroxyphenyl)propionic acid                  | Phenolic acids | 89    | 0.17687 | 92     | 6-H  |
| kz0041 |                                                           |                | 1.0 |         | kz0004 |                                                    |                | 1.084 |         | km007  |      |
| 69     | Isorhamnetin 3-O-β-D-Glucoside                            | Flavonols      | 9   | 0.09292 | 87     | 2,5-Dihydroxybenzoic acid                          | Phenolic acids | 03    | 0.17787 | 1      | Que  |
| kz0001 |                                                           |                | 1.0 |         | kz0053 |                                                    |                | 1.069 |         | kz0005 |      |
| 47     | Methylquercetin O-hexoside                                | Flavonols      | 9   | 0.09517 | 89     | Byzantionoside A                                   | Others         | 58    | 0.17989 | 92     | Ros  |
| kz0028 |                                                           |                | 1.0 |         | kz0005 |                                                    |                | 1.071 |         | kz0013 |      |
| 29     | Isorhamnetin-7-O-glucoside                                | Flavonols      | 9   | 0.09566 | 53     | Neochlorogenic acid(5-O-Caffeoylquinic acid)       | Phenolic acids | 73    | 0.18052 | 35     | Pro  |
| kz0037 |                                                           |                | 1.0 |         | kz0041 |                                                    |                | 1.082 |         | kz0013 |      |
| 14     | 6-O-Galloylglucose                                        | Phenolic acids | 9   | 0.09570 | 33     | L-Ascorbic acid                                    | Vitamins       | 44    | 0.19856 | 33     | Pro  |
| kz0034 |                                                           |                | 1.0 |         | kz0038 |                                                    |                | 1.083 |         | kz0004 |      |
| 97     | 3-O-Galloyl-β-D-glucose                                   | Phenolic acids | 9   | 0.09722 | 63     | Sanguisorbigenin                                   | Terpenoids     | 13    | 0.20173 | 77     | Tyro |
| kz0029 |                                                           |                | 1.0 |         | kz0026 |                                                    |                | 1.040 |         | kz0010 |      |
| 82     | 6-methoxykaempferol-3-O-glucoside                         | Flavonols      | 9   | 0.09795 | 65     | Betulinic acid                                     | Terpenoids     | 31    | 0.20622 | 90     | Me   |
| kz0041 |                                                           |                | 1.0 |         | kz0047 |                                                    |                | 1.084 |         | kz0006 |      |
| 74     | Benzyl-O-β-D-glucopyranose-β-D-xyranoside                 | Others         | 2   | 0.09931 | 74     | (2R)-Pinocembrin-7-neohesperidoside                | Flavanones     | 07    | 0.21239 | 98     | Cya  |
| kz0031 |                                                           |                | 1.0 |         | kz0006 |                                                    |                | 1.055 |         | kz0041 |      |
| 00     | 5-O-Galloylhamamelose                                     | Phenolic acids | 9   | 0.10011 | 13     | 1,2,3,6-Tetra-O-Galloyl-D-Glucose                  | Phenolic acids | 87    | 0.22107 | 74     | Ben  |
| kz0005 |                                                           |                | 1.0 |         | kz0038 |                                                    |                | 1.074 |         | kz0011 |      |
| 77     | Hexahydroxydiphenoylglucose                               | Phenolic acids | 9   | 0.10074 | 60     | Caffeoyl hawthorn acid                             | Terpenoids     | 95    | 0.22572 | 75     | Escu |
| kz0052 |                                                           |                | 1.0 |         | kz0031 |                                                    |                | 1.062 |         | kz0016 |      |
| 11     | 5,7,8,4'-Tetramethoxyflavone                              | Flavones       | 8   | 0.10299 | 16     | 2,4,6-trihydroxy benzoic acid                      | Organic acids  | 99    | 0.22793 | 71     | 5,7, |
| kz0005 |                                                           |                | 1.0 |         | kz0038 |                                                    |                | 1.079 |         | kz0005 |      |
| 96     | β-D-Furanofructosyl-α-D-(6-mustard acyl)glucoside         | Phenolic acids | 9   | 0.10548 | 54     | Roseoside                                          | Others         | 76    | 0.24325 | 04     | Caff |
| kz0008 |                                                           |                | 1.0 |         | kz0000 |                                                    |                | 1.076 |         | kz0041 |      |
| 41     | Luteolin-O-sinapoylhexoside                               | Flavones       | 8   | 0.11433 | 70     | Anthranilate O-hexosyl-O-hexoside                  | Phenolic acids | 07    | 0.25133 | 69     | Isor |
| kz0005 |                                                           |                | 1.0 |         | kz0017 |                                                    |                | 1.077 |         | kz0006 |      |
| 04     | Caffeic acid                                              | Phenolic acids | 9   | 0.11486 | 06     | Isololiolide                                       | Others         | 11    | 0.25276 | 12     | 1,3, |
| kz0008 |                                                           |                | 1.0 |         | kz0010 |                                                    |                | 1.084 |         | kz0037 |      |
| 81     | Avicularin                                                | Flavonols      | 9   | 0.11730 | 91     | Euscaphic acid                                     | Terpenoids     | 49    | 0.25788 | 20     | Ma   |
| kz0009 |                                                           |                | 1.0 |         | kz0011 |                                                    |                | 1.084 |         | kz0002 |      |
| 23     | 6-Hydroxykaempferol-3,6-O-Diglucoside-7-O-Glucuronic Acid | Flavonols      | 7   | 0.11925 | 54     | Nicotinamide                                       | Vitamins       | 30    | 0.26314 | 90     | Am   |
| kz0004 |                                                           |                | 1.0 |         | kz0030 |                                                    |                | 1.082 |         | kz0004 |      |
| 24     | Eriodictyol                                               | Flavanones     | 9   | 0.12258 | 38     | 3-O-(2-O-Acetyl-β-D-glucopyranosyl) oleanolic acid | Terpenoids     | 26    | 0.26364 | 91     | p-C  |
| kz0026 | Eriodictyol-O-glucoside                                   | Flavones       | 1.0 | 0.12993 | kz0004 | Sweroside                                          | Terpenoids     | 1.074 | 0.26514 | kz0010 | Cho  |

|        |                                          |                |     |         |        |                                                |                   |       |         |        |                    |
|--------|------------------------------------------|----------------|-----|---------|--------|------------------------------------------------|-------------------|-------|---------|--------|--------------------|
| 73     |                                          |                | 9   |         | 10     |                                                |                   | 52    |         | 96     |                    |
| km054  |                                          |                | 1.0 |         | kz0012 |                                                |                   | 1.081 |         | kz0012 |                    |
| 8      | Dihydroquercetin (Taxifolin)             | Flavonols      | 9   | 0.13011 | 79     | L-Homoserine                                   | Organic acids     | 19    | 0.27305 | 89     | Malic acid         |
| kz0051 |                                          |                | 1.0 |         | kz0011 |                                                |                   | 1.067 |         | kz0025 |                    |
| 87     | Dunalianoside B                          | Phenolic acids | 9   | 0.13376 | 77     | Scoparone                                      | Coumarins         | 71    | 0.27803 | 56     | 4-O-Methylcoumarin |
| kz0040 |                                          |                | 1.0 |         | kz0012 |                                                |                   | 1.080 |         | kz0033 |                    |
| 13     | Solatuberenol A                          | Others         | 8   | 0.13542 | 98     | L-(+)-Tartaric acid                            | Organic acids     | 33    | 0.30047 | 70     | Sweetgum           |
| kz0031 |                                          |                | 1.0 |         | kz0005 |                                                |                   | 1.071 |         | kz0015 |                    |
| 09     | Mearnsitrin                              | Flavones       | 9   | 0.13568 | 39     | 3-Hydroxy-4-isopropylbenzylalcohol 3-glucoside | Phenolic acids    | 28    | 0.31549 | 81     | Calcium            |
| kz0035 |                                          |                | 1.0 |         | kz0012 |                                                |                   | 1.069 |         | kz0012 |                    |
| 40     | Dihydrokaempferol-7-O-glucoside          | Flavonols      | 9   | 0.13591 | 89     | Malic acid                                     | Organic acids     | 72    | 0.31886 | 75     | Methyl             |
| kz0003 |                                          |                | 1.0 |         | kz0011 |                                                |                   | 1.033 |         | kz0028 |                    |
| 08     | N-[-Jasmonoyl]-(L)-Isoleucine (JA-L-Ile) | Organic acids  | 9   | 0.13629 | 03     | 6-Hydroxynicotinic acid                        | Alkaloids         | 20    | 0.32235 | 29     | Isonicotinic       |
| kz0010 |                                          |                | 1.0 |         | kz0028 |                                                |                   | 1.081 |         | kz0047 |                    |
| 20     | 4-Methyl-5-thiazoleethanol               | Others         | 9   | 0.14018 | 53     | Dihydroisopelletierine                         | Alkaloids         | 68    | 0.32303 | 56     | N-Bornyl           |
| kz0010 |                                          |                | 1.0 |         | kz0012 |                                                |                   | 1.084 |         | kz0000 |                    |
| 76     | Ethyl gallate                            | Phenolic acids | 9   | 0.14267 | 83     | 6-Aminocaproic acid                            | Organic acids     | 03    | 0.32788 | 51     | 4-Methyl           |
| kz0047 |                                          |                | 1.0 |         | kz0037 |                                                |                   | 1.018 |         | kz0010 |                    |
| 35     | Ligraminol E                             | Others         | 8   | 0.14464 | 19     | Methyl 4,6-di-O-galloyl-D-glucoside            | Phenolic acids    | 06    | 0.32836 | 79     | Gallotannin        |
| kz0022 |                                          |                | 1.0 |         | kz0010 |                                                |                   | 1.073 |         | kz0012 |                    |
| 11     | Quercetin 3-O-β-D-xylopyranoside         | Flavonols      | 9   | 0.14493 | 97     | Betaine                                        | Alkaloids         | 35    | 0.32968 | 76     | Succinic           |
| kz0006 |                                          |                | 1.0 |         | km081  |                                                |                   | 1.060 |         | kz0050 |                    |
| 13     | 1,2,3,6-Tetra-O-Galloyl-D-Glucose        | Phenolic acids | 8   | 0.15028 | 8      | Myricetin 3-O-rhamnoside (Myricitrin)          | Flavonols         | 30    | 0.33372 | 88     | Tricloro           |
| kz0003 |                                          |                | 1.0 |         | km008  |                                                |                   | 1.079 |         | kz0007 |                    |
| 04     | (±)-jasmonic acid                        | Organic acids  | 9   | 0.15322 | 0      | Biochanin A                                    | Isoflavones       | 94    | 0.33640 | 79     | Diosmetin          |
| kz0026 |                                          |                | 1.0 |         | kz0005 |                                                |                   | 1.035 |         | kz0041 |                    |
| 07     | Lariciresinol glucopyranoside            | Others         | 9   | 0.15396 | 84     | 5-O-p-Coumaroyl quinic acid O-hexoside         | Phenolic acids    | 96    | 0.34771 | 70     | Rhamnose           |
| kz0038 |                                          |                | 1.0 |         | kz0013 |                                                | Proanthocyanidins | 1.014 |         | kz0008 |                    |
| 54     | Roseoside                                | Others         | 9   | 0.15467 | 31     | Procyanidin A1                                 |                   | 27    | 0.34892 | 84     | Kaempferol         |
| kz0009 |                                          |                | 1.0 |         | kz0011 |                                                |                   | 1.077 |         | km023  |                    |
| 97     | Terpineol monO-glucoside                 | Lignans        | 9   | 0.15469 | 93     | Prunetin                                       | Isoflavones       | 32    | 0.36155 | 9      | Chrysin            |
| kz0011 |                                          |                | 1.0 |         | kz0012 |                                                |                   | 1.081 |         | kz0001 |                    |
| 77     | Scoparone                                | Coumarins      | 9   | 0.15969 | 68     | 2-Furanoic acid                                | Organic acids     | 47    | 0.37093 | 47     | Methyl             |
| km140  |                                          |                | 1.0 |         | kz0046 |                                                |                   | 1.076 |         | km043  |                    |
| 5      | Nicotinic acid-hexoside                  | Vitamins       | 8   | 0.16522 | 36     | 2α-hydroxypyraçrenic acid                      | Terpenoids        | 10    | 0.38159 | 6      | Afzelechin         |
| kz0013 |                                          |                | 1.0 |         | kz0038 |                                                |                   | 1.028 |         | kz0025 |                    |
| 12     | Shikimic acid                            | Organic acids  | 9   | 0.16935 | 61     | 3-O-Trans-feruloyl euscaphic acid              | Terpenoids        | 30    | 0.38317 | 54     | p-Hydroxy          |
| kz0012 |                                          |                | 1.0 |         | km087  |                                                |                   | 1.064 |         | kz0000 |                    |
| 97     | (Rs)-Mevalonic acid lithium salt         | Organic acids  | 9   | 0.16956 | 9      | Orotic acid                                    | Vitamins          | 22    | 0.38500 | 49     | 2-(Furan-2-yl)     |
| kz0040 |                                          |                | 1.0 |         | kz0022 |                                                |                   | 1.073 |         | kz0038 |                    |
| 15     | Cis-p-coumaric acid 4-O-glucoside        | Others         | 9   | 0.18049 | 20     | Olivil-4'-O-β-D-glucoside                      | Lignans           | 53    | 0.38927 | 60     | Caffeoyl           |
| kz0029 | Diosmetin-7-O-galactoside                | Flavones       | 1.0 | 0.18110 | kz0010 | D-Glucurono-6,3-lactone                        | Others            | 1.055 | 0.39459 | kz0028 | Dimethyl           |

|        |                                                      |                |     |         |        |                                                       |                |       |         |        |      |
|--------|------------------------------------------------------|----------------|-----|---------|--------|-------------------------------------------------------|----------------|-------|---------|--------|------|
| 77     |                                                      |                | 7   |         | 25     |                                                       |                | 75    |         | 07     |      |
| kz0004 |                                                      |                | 1.0 |         | kz0015 |                                                       |                | 1.079 |         | kz0002 |      |
| 17     | Phloretin                                            | Chalcones      | 8   | 0.18178 | 98     | Stachydrine                                           | Alkaloids      | 90    | 0.39570 | 59     | Thia |
| kz0026 |                                                      |                | 1.0 |         | kz0052 |                                                       |                | 1.075 |         | kz0005 |      |
| 87     | Nortrachelogenin 4-O-β-D-glucoside                   | Lignans        | 7   | 0.18286 | 47     | Limonin                                               | Others         | 14    | 0.39819 | 57     | Gluc |
| kz0025 |                                                      |                | 1.0 |         | kz0037 |                                                       |                | 1.023 |         | kz0002 |      |
| 48     | p-Coumaric acid-O-glycoside                          | Phenolic acids | 9   | 0.18647 | 18     | 2,3-Di-O-Galloyl-D-Glucose                            | Phenolic acids | 88    | 0.40206 | 01     | D-g  |
| kz0037 |                                                      |                | 1.0 |         | kz0002 |                                                       |                | 1.079 |         | kz0046 |      |
| 20     | Maplexin H                                           | Phenolic acids | 8   | 0.19104 | 31     | 5-Aminolevulinate                                     | Alkaloids      | 40    | 0.40391 | 78     | Anr  |
| kz0024 |                                                      |                | 1.0 |         | kz0010 |                                                       |                | 1.082 |         | kz0029 |      |
| 86     | 1,4,8-trihydroxy naphthalene-1-O-β-D-glucopyranoside | Quinones       | 9   | 0.19536 | 88     | 3,24-Dihydroxy-17,21-semiacetal-12(13)oleanolic fruit | Terpenoids     | 74    | 0.40587 | 82     | 6-m  |
| kz0000 |                                                      |                | 1.0 |         | kz0002 |                                                       |                | 1.080 |         | kz0005 |      |
| 59     | 3-O-p-Coumaroylshikimic acid                         | Phenolic acids | 7   | 0.19613 | 32     | O-Phosphocholine                                      | Alkaloids      | 97    | 0.40975 | 12     | Syri |
| kz0038 |                                                      |                | 1.0 |         | kz0047 |                                                       |                | 1.075 |         | kz0011 |      |
| 61     | 3-O-Trans-feruloyl euscaphic acid                    | Terpenoids     | 8   | 0.19874 | 56     | N-Benzylmethylene isomethylamine                      | Alkaloids      | 90    | 0.41132 | 05     | Ace  |
| kz0004 |                                                      |                | 1.0 |         | kz0010 |                                                       |                | 1.083 |         | kz0025 |      |
| 31     | Eriodictyol 7-O-glucoside                            | Flavanones     | 7   | 0.19903 | 87     | Maslinic acid                                         | Terpenoids     | 09    | 0.41353 | 46     | Isos |
| kz0005 |                                                      |                | 1.0 |         | kz0046 |                                                       |                | 1.081 |         | kz0035 |      |
| 54     | Chlorogenic acid                                     | Phenolic acids | 9   | 0.20145 | 27     | alphitolic acid                                       | Terpenoids     | 39    | 0.41686 | 17     | Gluc |
| kz0005 |                                                      |                | 1.0 |         | kz0035 |                                                       |                | 1.081 |         | kz0022 |      |
| 22     | Methyl sinapate                                      | Phenolic acids | 6   | 0.20451 | 49     | Hederagenin                                           | Others         | 83    | 0.41845 | 19     | Epip |
| kz0012 |                                                      |                | 1.0 |         | kz0010 |                                                       |                | 1.082 |         | kz0053 |      |
| 81     | Citraconic acid                                      | Organic acids  | 9   | 0.22024 | 89     | 2-Hydroxyoleanolic acid                               | Terpenoids     | 24    | 0.41881 | 55     | Koa  |
| kz0031 |                                                      |                | 1.0 |         | kz0040 |                                                       |                | 1.059 |         | kz0010 |      |
| 03     | Gemin D                                              | Phenolic acids | 9   | 0.22244 | 21     | 6-Deoxyfagomine                                       | Alkaloids      | 74    | 0.42253 | 97     | Bet  |
| kz0029 |                                                      |                | 1.0 |         | kz0046 |                                                       |                | 1.082 |         | kz0009 |      |
| 95     | Quercetin-7-O-(6'-O-malonyl)-β-D-glucoside           | Flavonols      | 7   | 0.23150 | 26     | pomolic acid                                          | Terpenoids     | 94    | 0.42260 | 69     | Afze |
| km121  |                                                      |                | 1.0 |         | kz0000 |                                                       |                | 1.017 |         | kz0005 |      |
| 1      | Chrysoeriol 7-O-hexoside                             | Flavones       | 4   | 0.23276 | 50     | Homogentisic acid                                     | Phenolic acids | 86    | 0.48112 | 37     | 3-G  |
| kz0020 |                                                      |                | 1.0 |         | kz0026 |                                                       |                | 1.018 |         | kz0002 |      |
| 63     | Galloyl-HHDP(Hexahydroxydiphenoyl)-glueopy ranose    | Phenolic acids | 8   | 0.24006 | 87     | Nortrachelogenin 4-O-β-D-glucoside                    | Lignans        | 70    | 0.48887 | 58     | Nico |
| kz0051 |                                                      |                | 1.0 |         | kz0016 |                                                       |                | 1.046 |         | kz0050 |      |
| 86     | Dunalianoside C                                      | Phenolic acids | 8   | 0.25114 | 42     | 5'-Glucopyranosyloxyjasmanic acid                     | Phenolic acids | 87    | 0.48946 | 84     | (Ka  |
| kz0000 |                                                      |                | 1.0 |         | kz0002 |                                                       |                | 1.083 |         | kz0009 |      |
| 52     | Ethyl 3,4-Dihydroxybenzoate (Ethyl protocatechuate)  | Phenolic acids | 8   | 0.25241 | 01     | D-galacitol                                           | Others         | 76    | 0.49021 | 92     | Pinc |
| kz0029 |                                                      |                | 1.0 |         | kz0002 |                                                       |                | 1.072 |         | km081  |      |
| 49     | Hispidulin                                           | Flavones       | 7   | 0.25402 | 40     | Trans-Zeatin-9-N-Glucoside                            | Alkaloids      | 77    | 2.01911 | 4      | Mo   |
| kz0009 |                                                      |                | 1.0 |         | kz0005 |                                                       |                | 1.077 |         | kz0020 |      |
| 95     | Syringaresinol                                       | Lignans        | 9   | 0.25586 | 01     | Methyl p-coumarate                                    | Phenolic acids | 76    | 2.05142 | 08     | 3,5, |
| km068  |                                                      |                | 1.0 |         | km023  |                                                       |                | 1.047 |         | kz0029 |      |
| 6      | Kaempferol 3-O-rhamnoside (Kaempferin)               | Flavonols      | 9   | 0.25778 | 5      | Apigenin                                              | Flavones       | 22    | 2.09381 | 49     | Hisp |
| kz0028 | Dihydroisopelletierine                               | Alkaloids      | 1.0 | 0.25997 | kz0007 | Luteolin-7-O-glucoside(Cynaroside)                    | Flavones       | 1.073 | 2.10816 | kz0005 | Met  |

|        |                                          |                |     |         |        |                                                            |                |       |         |        |      |
|--------|------------------------------------------|----------------|-----|---------|--------|------------------------------------------------------------|----------------|-------|---------|--------|------|
| 53     |                                          |                | 9   |         | 95     |                                                            | 71             |       | 01      |        |      |
| kz0013 |                                          |                | 1.0 |         | kz0003 |                                                            | 1.071          |       | km130   |        |      |
| 18     | Quinic Acid                              | Organic acids  | 9   | 0.26365 | 12     | A-Ketoglutaric acid                                        | Organic acids  | 71    | 2.17849 | 7      | Ison |
| kz0002 |                                          |                | 1.0 |         | kz0005 |                                                            | 1.080          |       | kz0038  |        |      |
| 84     | 3-Hydroxypropanoic acid                  | Organic acids  | 8   | 0.26557 | 14     | 3,4-Dimethoxycinnamic acid                                 | Phenolic acids | 04    | 2.21638 | 23     | Kam  |
| kz0026 |                                          |                | 1.0 |         | kz0005 |                                                            | 1.075          |       | km068   |        |      |
| 78     | Quercetin-3-O-(6''-O-acetyl)-galactoside | Flavonols      | 8   | 0.26571 | 11     | Ferulic acid                                               | Phenolic acids | 12    | 2.24935 | 3      | Kae  |
| km023  |                                          |                | 1.0 |         | kz0050 |                                                            | 1.063          |       | kz0005  |        |      |
| 9      | Chrysoeriol                              | Flavones       | 7   | 0.26644 | 79     | Kaempferol-4'-O-β-D-glucopyranoside                        | Flavonols      | 03    | 2.25118 | 36     | 5-G  |
| kz0005 |                                          |                | 1.0 |         | kz0028 |                                                            | 1.078          |       | kz0008  |        |      |
| 60     | Trihydroxycinnamoylquinic acid           | Phenolic acids | 8   | 0.29274 | 62     | Dihydrosedinine                                            | Alkaloids      | 85    | 2.29400 | 66     | Que  |
| kz0016 |                                          |                | 1.0 |         | km043  |                                                            | 1.083          |       | kz0006  |        |      |
| 71     | 5,7,2'-Trhiyrox-8-methoxyflavone         | Flavones       | 8   | 0.30671 | 6      | Afzelechin (3,5,7,4'-Tetrahydroxyflavan)                   | Flavanones     | 69    | 2.31188 | 13     | 1,2, |
| kz0009 |                                          |                | 1.0 |         | kz0038 |                                                            | 1.054          |       | kz0012  |        |      |
| 92     | Pinoresinol                              | Lignans        | 9   | 0.31102 | 11     | Kaempferol-malonyl-3-O-glucoside                           | Flavonols      | 93    | 2.36829 | 85     | 2-M  |
| kz0022 |                                          |                | 1.0 |         | kz0038 |                                                            | 1.079          |       | kz0046  |        |      |
| 21     | Eucommin A                               | Lignans        | 8   | 0.31565 | 49     | dihydrodehydrodiconiferyl alcohol 4-O-β-D-glucopyranosides | Lignans        | 02    | 2.41183 | 36     | 2α-  |
| km129  |                                          |                | 1.0 |         | kz0021 |                                                            | 1.007          |       | kz0050  |        |      |
| 3      | Hesperetin O-malonylhexoside             | Flavanones     | 9   | 0.31611 | 64     | Isoluteolin (Orobol)(5,7,3',4'-tetrahydroxyisoflavone)     | Isoflavones    | 26    | 2.44226 | 78     | Kae  |
| kz0007 |                                          |                | 1.0 |         | kz0005 |                                                            | 1.073          |       | kz0034  |        |      |
| 79     | Diosmetin                                | Flavones       | 8   | 0.31841 | 12     | Syringic acid                                              | Phenolic acids | 29    | 2.44294 | 97     | 3-O  |
| kz0038 |                                          |                | 1.0 |         | kz0010 |                                                            | 1.081          |       | kz0031  |        |      |
| 11     | Kaempferol-malonyl-3-O-glucoside         | Flavonols      | 5   | 0.32473 | 96     | Choline                                                    | Alkaloids      | 12    | 2.47368 | 00     | 5-O  |
| kz0022 |                                          |                | 1.0 |         | kz0000 |                                                            | 1.082          |       | kz0031  |        |      |
| 19     | (+)-Epipinoresinol                       | Lignans        | 9   | 0.32698 | 53     | Isoferulic Acid                                            | Phenolic acids | 17    | 2.55076 | 09     | Me   |
| kz0000 |                                          |                | 1.0 |         | kz0000 |                                                            | 1.082          |       | kz0037  |        |      |
| 68     | Catechin gallate                         | Phenolic acids | 6   | 0.33213 | 56     | Salicylic acid glucoside                                   | Phenolic acids | 65    | 2.55197 | 14     | 6-O  |
| km007  |                                          |                | 1.0 |         | kz0009 |                                                            | 1.082          |       | kz0005  |        |      |
| 1      | Quercetin 3-O-galactoside (Hyperin)      | Flavonols      | 9   | 0.33575 | 69     | Afzelechin(3,5,7,4'-Tetrahydroxyflavan)                    | Flavanols      | 90    | 2.56019 | 32     | Pro  |
| kz0022 |                                          |                | 1.0 |         | km057  |                                                            | 1.015          |       | kz0022  |        |      |
| 14     | isohyperoside                            | Flavonols      | 9   | 0.33900 | 3      | Epicatechin gallate (ECG)                                  | Flavanols      | 52    | 2.58712 | 20     | Oliv |
| kz0030 |                                          |                | 1.0 |         | kz0053 |                                                            | 1.081          |       | kz0009  |        |      |
| 98     | 3-O-Digalloyl quinic acid                | Phenolic acids | 6   | 0.34151 | 75     | Isolariciresinol 9'-O-Glucoside                            | Lignans        | 58    | 2.59903 | 71     | Cate |
| kz0008 |                                          |                | 1.0 |         | kz0009 |                                                            | 1.077          |       | km077   |        |      |
| 92     | 6-Hydroxykaempferol-7-O-glucoside        | Flavonols      | 9   | 0.34564 | 15     | 6-Hydroxykaempferol-7,6-O-Diglucoside                      | Flavonols      | 60    | 2.60181 | 9      | Lute |
| kz0005 |                                          |                | 1.0 |         | kz0050 |                                                            | 1.067          |       | kz0029  |        |      |
| 73     | p-Coumaroylferuloyltartaric acid         | Phenolic acids | 9   | 0.35000 | 46     | Dihydrokaempferol-3-O-β-D-glucoside                        | Flavanols      | 84    | 2.61257 | 95     | Que  |
| kz0004 |                                          |                | 1.0 |         | kz0002 |                                                            | 1.084          |       | kz0036  |        |      |
| 79     | Cinnamic acid                            | Phenolic acids | 9   | 0.35135 | 91     | 2-Picolinic acid                                           | Organic acids  | 05    | 2.63652 | 90     | Que  |
| kz0031 |                                          |                | 1.0 |         | km008  |                                                            | 1.056          |       | kz0005  |        |      |
| 16     | 2,4,6-trihydroxy benzoic acid            | Organic acids  | 3   | 0.35629 | 1      | Genistein (4',5,7-Trihydroxyisoflavone)                    | Isoflavones    | 75    | 2.63936 | 60     | Trih |
| km022  | Quercetin 3-O-glucoside (Isotrifoliin)   | Flavonols      | 1.0 | 0.35728 | kz0011 | Indole-3-carboxaldehyde                                    | Alkaloids      | 1.037 | 2.66086 | kz0007 | Lute |

|        |                                          |                |     |         |        |                                             |                |       |         |       |      |
|--------|------------------------------------------|----------------|-----|---------|--------|---------------------------------------------|----------------|-------|---------|-------|------|
| 8      |                                          |                | 9   |         | 99     |                                             | 26             |       | 95      |       |      |
| kz0000 |                                          |                | 1.0 |         | kz0002 |                                             | 1.079          |       | kz0050  |       |      |
| 56     | Salicylic acid glucoside                 | Phenolic acids | 9   | 0.36239 | 58     | Nicotinate D-ribonucleoside                 | Vitamins       | 01    | 2.68000 | 46    | Dihy |
| kz0005 |                                          |                | 1.0 |         | kz0005 |                                             | 1.081          |       | kz0053  |       |      |
| 57     | Glucosyringic Acid                       | Phenolic acids | 8   | 0.36495 | 77     | Hexahydroxydiphenoylglucose                 | Phenolic acids | 42    | 2.70811 | 73    | Lyo  |
| kz0010 |                                          |                | 1.0 |         | kz0053 |                                             | 1.073          |       | kz0050  |       |      |
| 75     | Methyl gallate                           | Phenolic acids | 8   | 0.36712 | 70     | (+)-Isolariciresinol                        | Lignans        | 73    | 2.86395 | 79    | Kae  |
| kz0004 |                                          |                | 1.0 |         | kz0012 |                                             | 1.083          |       | kz0010  |       |      |
| 95     | 3-(4-Hydroxyphenyl)-propionic acid       | Phenolic acids | 9   | 0.36834 | 93     | 4-Guanidinobutyric acid                     | Organic acids  | 18    | 2.90886 | 18    | 3-A  |
| kz0023 |                                          |                | 1.0 |         | kz0002 |                                             | 1.081          |       | kz0038  |       |      |
| 37     | Luteolin-7-O-β-D-gentiobioside           | Flavones       | 5   | 0.37482 | 96     | Citramalate                                 | Organic acids  | 02    | 2.95580 | 21    | Kam  |
| kz0011 |                                          |                | 1.0 |         | kz0053 |                                             | 1.082          |       | kz0026  |       |      |
| 54     | Nicotinamide                             | Vitamins       | 9   | 0.38506 | 55     | Koaburaside                                 | Phenolic acids | 91    | 2.99645 | 04    | Kae  |
| kz0025 |                                          |                | 1.0 |         | kz0041 |                                             | 1.072          |       | kz0025  |       |      |
| 58     | 6-O-caffeoyl-β-glucose                   | Phenolic acids | 8   | 0.38880 | 69     | Isorhamnetin 3-O-β-D-Glucoside              | Flavonols      | 28    | 3.08092 | 60    | 6-O  |
| kz0031 |                                          |                | 1.0 |         | kz0011 |                                             | 1.082          |       | kz0005  |       |      |
| 08     | mlyricetin 3-O-B-D-glucopyranoside       | Flavonols      | 6   | 0.39196 | 63     | Riboflavin                                  | Vitamins       | 34    | 3.12951 | 40    | 3,4, |
| kz0050 |                                          |                | 1.0 |         | kz0015 |                                             | 1.081          |       | kz0013  |       |      |
| 54     | Chrysin-7-glucoside                      | Flavones       | 8   | 0.39706 | 81     | Calceorioside B                             | Others         | 20    | 3.24356 | 08    | D-X  |
| km032  |                                          |                | 1.0 |         | kz0028 |                                             | 1.075          |       | kz0025  |       |      |
| 9      | 3-(4-Hydroxyphenyl)propionic acid        | Phenolic acids | 9   | 0.40153 | 29     | Isorhamnetin-7-O-glucoside                  | Flavonols      | 44    | 3.26793 | 57    | 4-O  |
| kz0020 |                                          |                | 1.0 |         | kz0011 |                                             | 1.073          |       | kz0004  |       |      |
| 08     | 3,5,7,4'--Tetrahydroxy-Coumaronochromone | Others         | 5   | 0.40591 | 13     | Lumichrome                                  | Alkaloids      | 67    | 3.32550 | 75    | 4-H  |
| kz0004 |                                          |                | 1.0 |         | kz0007 |                                             | 1.076          |       | kz0027  |       |      |
| 14     | 2-Picolylamine                           | Alkaloids      | 7   | 0.43198 | 91     | Apigenin 7-O-glucoside(Cosmosiin)           | Flavones       | 73    | 3.36863 | 83    | Kae  |
| kz0017 |                                          |                | 1.0 |         | kz0033 |                                             | 1.040          |       | kz0009  |       |      |
| 10     | Stilbostemin B                           | Others         | 6   | 0.43279 | 70     | Swertiamarin                                | Terpenoids     | 66    | 3.38871 | 95    | Syri |
| kz0010 |                                          |                | 1.0 |         | kz0009 |                                             | 1.078          |       | kz0008  |       |      |
| 41     | N-Acetyl-D-glucosamine 1-phosphate       | Others         | 9   | 0.43855 | 11     | Quercetin-7-O-rutinoside                    | Flavonols      | 83    | 3.40781 | 12    | Tric |
| kz0009 |                                          |                | 1.0 |         | kz0001 |                                             | 1.079          |       | kz0002  |       |      |
| 15     | 6-Hydroxykaempferol-7,6-O-Diglucoside    | Flavonols      | 9   | 0.44120 | 47     | Methylquercetin O-hexoside                  | Flavonols      | 27    | 3.41294 | 40    | Tran |
| kz0029 |                                          |                | 1.0 |         | kz0010 |                                             | 1.083          |       | kz0015  |       |      |
| 33     | Ixerin D                                 | Terpenoids     | 8   | 0.44150 | 20     | 4-Methyl-5-thiazoleethanol                  | Others         | 88    | 3.42270 | 84    | Que  |
| kz0000 |                                          |                | 1.0 |         | kz0050 |                                             | 1.080          |       | kz0051  |       |      |
| 47     | Mandelic acid                            | Phenolic acids | 9   | 0.44222 | 88     | Tricetin?4'-methyl?ether-3'-O-β-D-glucoside | Flavonols      | 49    | 3.45499 | 86    | Dur  |
| kz0011 |                                          |                | 1.0 |         | kz0041 |                                             | 1.084          |       | kz0004  |       |      |
| 75     | Esculetin                                | Coumarins      | 6   | 0.44751 | 70     | Rhamnetin 3-O-β-D-Glucoside                 | Flavonols      | 02    | 3.49603 | 31    | Erio |
| kz0005 |                                          |                | 1.0 |         | kz0013 |                                             | 1.083          |       | kz0025  |       |      |
| 49     | 1-O-[(E)-Caffeoyl]-β-D-glucopyranose     | Phenolic acids | 8   | 0.44969 | 18     | Quinic Acid                                 | Organic acids  | 24    | 3.49885 | 48    | p-C  |
| kz0001 |                                          |                | 1.0 |         | kz0029 |                                             | 1.082          |       | kz0004  |       |      |
| 21     | Chrysin 5-O-glucoside (Toringin)         | Flavones       | 8   | 0.45566 | 82     | 6-methoxykaempferol-3-O-glucoside           | Flavonols      | 01    | 3.50433 | 66    | 4-H  |
| kz0005 | Coniferin                                | Phenolic acids | 1.0 | 0.45730 | kz0041 | Quercetin 3-O-β-D-neohesperidoside          | Flavonols      | 1.081 | 3.55085 | km009 | Oro  |



|        |                                                |                |     |         |        |                                                     |                |       |         |        |                                  |
|--------|------------------------------------------------|----------------|-----|---------|--------|-----------------------------------------------------|----------------|-------|---------|--------|----------------------------------|
| 50     |                                                |                | 9   |         | 73     |                                                     | 45             |       | 8       |        |                                  |
| kz0011 |                                                |                | 1.0 |         | kz0038 |                                                     | 1.037          |       | kz0038  |        |                                  |
| 55     | Nicotinic acid                                 | Vitamins       | 8   | 0.46114 | 59     | p-Coumaroyleuscaphic acid                           | Terpenoids     | 23    | 3.60244 | 29     | Quercetin-3-O-rutinoside (Rutin) |
| kz0052 |                                                |                | 1.0 |         | kz0009 |                                                     | 1.083          |       | kz0051  |        |                                  |
| 02     | Dihydrokaempferol                              | Flavanols      | 6   | 0.47322 | 09     | Quercetin-3-O-rutinoside (Rutin)                    | Flavonols      | 08    | 3.61553 | 98     | Pterocarpans                     |
| kz0046 |                                                |                | 1.0 |         | kz0005 |                                                     | 1.079          |       | kz0035  |        |                                  |
| 97     | Taxifolin-3'-O-β-D-glucoside                   | Flavones       | 5   | 0.49424 | 00     | Riboprine                                           | Phenolic acids | 71    | 3.65002 | 72     | Biotin                           |
| kz0002 |                                                |                | 1.0 |         | km130  |                                                     | 1.078          |       | kz0033  |        |                                  |
| 91     | 2-Picolinic acid                               | Organic acids  | 8   | 0.49728 | 7      | Isorhamnetin 5-O-hexoside                           | Flavonols      | 24    | 3.69444 | 62     | Tubercularic acid                |
| kz0008 |                                                |                | 1.0 |         | kz0009 |                                                     | 1.081          |       | kz0046  |        |                                  |
| 88     | Quercetin-3-O-β-D-Galactoside (Hyperin)        | Flavonols      | 8   | 0.49761 | 08     | Quercetin-3-O-robinobioside                         | Flavonols      | 41    | 3.70093 | 67     | Myricetin                        |
| kz0008 |                                                |                | 1.0 |         | kz0038 |                                                     | 1.055          |       | kz0009  |        |                                  |
| 89     | Spiraeoside                                    | Flavonols      | 9   | 0.49960 | 12     | Isorhamnetin O-malonylglucoside                     | Flavonols      | 48    | 3.74847 | 04     | Tiludrone                        |
| kz0030 |                                                |                | 1.0 |         | kz0009 |                                                     | 1.082          |       | kz0051  |        |                                  |
| 97     | 3,4-Di-O-galloyl-shikimic acid                 | Phenolic acids | 9   | 2.01010 | 71     | Catechin                                            | Flavanols      | 78    | 3.83453 | 32     | Luteolin                         |
| kz0010 |                                                |                | 1.0 |         | km140  |                                                     | 1.080          |       | kz0017  |        |                                  |
| 93     | Oleanolic acid 2-O-β-D-glucopyranoside         | Terpenoids     | 9   | 2.16236 | 5      | Nicotinic acid-hexoside                             | Vitamins       | 27    | 4.01995 | 39     | Quercetin-3-O-rutinoside (Rutin) |
| km126  |                                                |                | 1.0 |         | kz0007 |                                                     | 1.082          |       | km140   |        |                                  |
| 9      | 3,7-Di-O-methylquercetin                       | Flavonols      | 9   | 2.21042 | 92     | Apigenin 5-O-glucoside                              | Flavones       | 44    | 4.03128 | 5      | Nicotinic acid                   |
| kz0051 |                                                |                | 1.0 |         | kz0013 |                                                     | 1.069          |       | kz0017  |        |                                  |
| 36     | Camaldulenic acid                              | Terpenoids     | 9   | 2.22589 | 12     | Shikimic acid                                       | Organic acids  | 94    | 4.04146 | 42     | Metoprolol                       |
| kz0009 |                                                |                | 1.0 |         | kz0024 |                                                     | 1.063          |       | kz0040  |        |                                  |
| 11     | Quercetin-7-O-rutinoside                       | Flavonols      | 8   | 2.25872 | 85     | 3-methoxy-juglone                                   | Quinones       | 90    | 4.23004 | 15     | Cis-3-pentadecenoic acid         |
| kz0037 |                                                |                | 1.0 |         | kz0040 |                                                     | 1.018          |       | km023   |        |                                  |
| 28     | Geniposide                                     | Terpenoids     | 1   | 2.26921 | 35     | 3-Indoleacrylic acid                                | Alkaloids      | 73    | 4.26822 | 5      | Apigenin                         |
| kz0052 |                                                |                | 1.0 |         | kz0009 |                                                     | 1.083          |       | kz0037  |        |                                  |
| 00     | Hesperetin 7-O-neohesperidoside(Neohesperidin) | Flavanones     | 9   | 2.27246 | 95     | Syringaresinol                                      | Lignans        | 30    | 4.31214 | 63     | Betulinic acid                   |
| kz0009 |                                                |                | 1.0 |         | kz0053 |                                                     | 1.071          |       | kz0011  |        |                                  |
| 20     | Quercetin-O-rutinoside-hexose                  | Flavonols      | 0   | 2.27826 | 73     | Lyoniresinol                                        | Lignans        | 84    | 4.31764 | 93     | Prunellin                        |
| kz0041 |                                                |                | 1.0 |         | km060  |                                                     | 1.064          |       | km008   |        |                                  |
| 73     | Quercetin 3-O-neohesperidoside                 | Flavonols      | 5   | 2.27926 | 2      | Genistein 7-O-Glucoside (Genistin)                  | Isoflavones    | 79    | 4.32852 | 0      | Biochanin A                      |
| kz0002 |                                                |                | 1.0 |         | kz0053 |                                                     | 1.071          |       | kz0005  |        |                                  |
| 74     | N-sinapoylhydroxycoumarin                      | Coumarins      | 6   | 2.29496 | 78     | 5'-methoxyisolariciresinol-9'-O-β-D-glucopyranoside | Lignans        | 30    | 4.46792 | 73     | p-Coumaric acid                  |
| kz0009 |                                                |                | 1.0 |         | kz0037 |                                                     | 1.061          |       | kz0037  |        |                                  |
| 09     | Quercetin-3-O-rutinoside (Rutin)               | Flavonols      | 8   | 2.36976 | 94     | Syringic Aldehyde-glucoside                         | Phenolic acids | 44    | 4.49612 | 21     | Maple syrup                      |
| kz0005 |                                                |                | 1.0 |         | kz0009 |                                                     | 1.079          |       | kz0004  |        |                                  |
| 42     | 1-O-Galloyl-β-D-glucose                        | Phenolic acids | 9   | 2.43943 | 12     | Isorhamnetin-3-O-rutinoside (Narcissin)             | Flavonols      | 99    | 4.53057 | 19     | Phloroglucinol                   |
| km023  |                                                |                | 1.0 |         | kz0050 |                                                     | 1.068          |       | km023   |        |                                  |
| 5      | Apigenin                                       | Flavones       | 6   | 2.46446 | 55     | Galangin-7-glucoside                                | Flavones       | 52    | 4.57255 | 1      | 2'-Hydroxyacetophenone           |
| km130  |                                                |                | 1.0 |         | kz0031 |                                                     | 1.081          |       | km008   |        |                                  |
| 0      | Hydroxy-methoxycinnamate                       | Phenolic acids | 8   | 2.48952 | 09     | Mearnsitrin                                         | Flavones       | 67    | 4.58442 | 1      | Geraniol                         |
| kz0034 | 2-O-Galloyl-β-D-glucose                        | Phenolic acids | 1.0 | 2.50889 | kz0004 | Vanillic acid                                       | Phenolic acids | 1.081 | 4.62008 | kz0015 | Isotriphenylmethane              |

|        |                                                            |                |     |         |        |                                                            |                |       |         |        |       |
|--------|------------------------------------------------------------|----------------|-----|---------|--------|------------------------------------------------------------|----------------|-------|---------|--------|-------|
| 98     |                                                            |                | 9   |         | 96     |                                                            | 41             |       | 86      |        |       |
| kz0053 |                                                            |                | 1.0 |         | kz0021 |                                                            | 1.061          |       | kz0053  |        |       |
| 78     | 5'-methoxyisolariciresinol-9'-O-β-D-glucopyranoside        | Lignans        | 8   | 2.54005 | 96     | 2'-Hydoxy,5-methoxy Genistein-O-rhamnosyl-glucoside        | Isoflavones    | 53    | 4.64540 | 78     | 5'-r  |
| kz0027 |                                                            |                | 1.0 |         | kz0035 |                                                            | 1.082          |       | kz0021  |        |       |
| 83     | Kaempferol 3-O-β-d-(6''-O-(E)-p-coumaroyl) glucopyranoside | Flavonols      | 9   | 2.59149 | 17     | Glucosyloxybenzoic acid                                    | Phenolic acids | 23    | 4.65532 | 64     | Isol  |
| kz0012 |                                                            |                | 1.0 |         | kz0013 |                                                            | 1.083          |       | kz0038  |        |       |
| 75     | Methylmalonic acid                                         | Organic acids  | 9   | 2.62644 | 32     | Procyanidin B2                                             | dins           | 67    | 4.76062 | 50     | (-)-s |
| kz0013 |                                                            |                | 1.0 |         | kz0027 |                                                            | 1.053          |       | kz0001  |        |       |
| 15     | Anchoic Acid                                               | Organic acids  | 7   | 2.63482 | 88     | Sexangularetin 3-glucoside-7-rhamnoside                    | Flavonols      | 73    | 4.80315 | 90     | Arb   |
| kz0011 |                                                            |                | 1.0 |         | kz0004 |                                                            | 1.066          |       | kz0020  |        |       |
| 01     | Trigonelline                                               | Alkaloids      | 9   | 2.70794 | 66     | 4-Hydroxybenzaldehyde                                      | Phenolic acids | 42    | 4.83881 | 65     | 4-α   |
| kz0019 |                                                            |                | 1.0 |         | kz0038 |                                                            | 1.079          |       | kz0025  |        |       |
| 73     | Kaempferol-3-O-(cinnamoyl)-sophoroside-7-O-glucose         | Flavonols      | 8   | 2.73346 | 15     | Kaempferol 3-O-(6''-trans-p-Coumaroyl)-β-D-glucopyranoside | Flavonols      | 61    | 4.94193 | 49     | Van   |
| kz0004 |                                                            |                | 1.0 |         | kz0013 |                                                            | 1.082          |       | kz0010  |        |       |
| 96     | Vanillic acid                                              | Phenolic acids | 9   | 2.73791 | 35     | Procyanidin B1                                             | dins           | 02    | 4.96513 | 75     | Me    |
| km008  |                                                            |                | 1.0 |         | kz0025 |                                                            | 1.082          |       | kz0005  |        |       |
| 1      | Genistein (4',5,7-Trihydroxyisoflavone)                    | Isoflavones    | 7   | 2.75563 | 56     | 4-O-glucosyl-4-hydroxybenzoic acid                         | Phenolic acids | 42    | 4.98115 | 00     | Rib   |
| kz0002 |                                                            |                | 1.0 |         | kz0025 |                                                            | 1.078          |       | kz0005  |        |       |
| 90     | Aminomalonic acid                                          | Organic acids  | 8   | 2.76608 | 52     | Sinapic acid-glycoside                                     | Phenolic acids | 11    | 5.03627 | 15     | Sin   |
| kz0012 |                                                            |                | 1.0 |         | kz0013 |                                                            | 1.082          |       | kz0038  |        |       |
| 76     | Succinic acid                                              | Organic acids  | 9   | 2.76660 | 33     | Procyanidin B3                                             | dins           | 58    | 5.05686 | 49     | dih   |
| kz0032 |                                                            |                | 1.0 |         | kz0005 |                                                            | 1.069          |       | kz0047  |        |       |
| 62     | Ayapin                                                     | Coumarins      | 7   | 2.79587 | 15     | Sinapinaldehyde                                            | Phenolic acids | 99    | 5.23262 | 38     | 4,7,  |
| km023  |                                                            |                | 1.0 |         | kz0041 |                                                            | 1.058          |       | kz0004  |        |       |
| 1      | 2'-Hydroxygenistein                                        | Isoflavones    | 1   | 2.81098 | 72     | Quercetin 3-O-β-D-xylopyranosyl(1→2)-β-D-galactopyranoside | Flavonols      | 43    | 5.33866 | 96     | Van   |
| kz0005 |                                                            |                | 1.0 |         | kz0025 |                                                            | 1.081          |       | kz0025  |        |       |
| 02     | Coniferaldehyde                                            | Phenolic acids | 7   | 2.85857 | 46     | Isosalicylic acid O-glycoside                              | Phenolic acids | 65    | 5.46608 | 52     | Sin   |
| kz0004 |                                                            |                | 1.0 |         | kz0009 |                                                            | 1.072          |       | km093   |        |       |
| 77     | Tyrosol                                                    | Phenolic acids | 5   | 2.86277 | 14     | 6-Hydroxykaempferol-3,6-O-Diglucoside                      | Flavonols      | 92    | 5.61705 | 4      | Que   |
| kz0009 |                                                            |                | 1.0 |         | kz0013 |                                                            | 1.082          |       | kz0030  |        |       |
| 08     | Quercetin-3-O-robinobioside                                | Flavonols      | 9   | 2.91491 | 08     | D-Xylonic acid                                             | Organic acids  | 83    | 5.99301 | 97     | 3,4-  |
| kz0018 |                                                            |                | 1.0 |         | kz0051 |                                                            | 1.073          |       | kz0008  |        |       |
| 19     | Salicylic acid                                             | Phenolic acids | 7   | 2.94087 | 37     | Isoscopoletin (6-Hydroxy-7-Methoxycoumarin)                | Coumarins      | 84    | 6.01299 | 90     | Que   |
| kz0013 |                                                            |                | 1.0 |         | kz0052 |                                                            | 1.082          |       | kz0053  |        |       |
| 13     | SubericAcid                                                | Organic acids  | 1   | 2.97894 | 00     | Hesperetin 7-O-neohesperidoside(Neohesperidin)             | Flavanones     | 82    | 6.03036 | 75     | Isol  |
| kz0002 |                                                            |                | 1.0 |         | kz0016 |                                                            | 1.078          |       | kz0012  |        |       |
| 01     | D-galacitol                                                | Others         | 9   | 2.99669 | 37     | Oresbiusin A                                               | Phenolic acids | 57    | 6.04555 | 93     | 4-G   |
| kz0004 |                                                            |                | 1.0 |         | kz0004 |                                                            | 1.071          |       | kz0000  |        |       |
| 84     | Vanillin                                                   | Phenolic acids | 9   | 3.02751 | 84     | Vanillin                                                   | Phenolic acids | 48    | 6.34304 | 32     | Caf   |
| kz0035 |                                                            |                | 1.0 |         | kz0013 |                                                            | 1.079          |       | kz0009  |        |       |
| 72     | Biondnoid I                                                | Flavonols      | 9   | 3.04365 | 40     | Procyanidin C2                                             | dins           | 07    | 6.51831 | 15     | 6-H   |
| kz0052 | Luteolin 7-O-neohesperidoside(Lonicerin)                   | Flavones       | 1.0 | 3.10010 | kz0009 | Epigallocatechin (EGC)                                     | Flavanols      | 1.078 | 7.02128 | kz0012 | 4-A   |

|        |                                                        |                |     |         |        |                                          |                |       |          |       |                             |
|--------|--------------------------------------------------------|----------------|-----|---------|--------|------------------------------------------|----------------|-------|----------|-------|-----------------------------|
| 25     |                                                        |                | 5   |         | 73     |                                          | 70             |       | 92       |       |                             |
| kz0005 |                                                        |                | 1.0 |         | kz0025 |                                          | 1.083          |       | km054    |       |                             |
| 07     | Syringic Aldehyde                                      | Phenolic acids | 9   | 3.20996 | 57     | 4-O-glucosyl-3,4-dihydroxybenzyl alcohol | Phenolic acids | 49    | 7.49347  | 8     | Dihydroxyacetophenone       |
| km009  |                                                        |                | 1.0 |         | kz0005 |                                          | 1.075          |       | kz0004   |       |                             |
| 8      | Orobol (5,7,3',4'-tetrahydroxyisoflavone)              | Isoflavones    | 2   | 3.33158 | 92     | Rosmarinyl Glucoside                     | Phenolic acids | 42    | 7.87865  | 12    | Aucubin                     |
| kz0012 |                                                        |                | 1.0 |         | kz0037 |                                          | 1.075          |       | kz0010   |       |                             |
| 83     | 6-Aminocaproic acid                                    | Organic acids  | 3   | 3.34598 | 55     | Quercetin-3-sambubioside                 | Flavonols      | 53    | 8.08777  | 25    | D-Glucose                   |
| kz0003 |                                                        |                | 1.0 |         | kz0009 |                                          | 1.078          |       | kz0030   |       |                             |
| 02     | 2-Isopropylmalate                                      | Organic acids  | 7   | 3.35369 | 74     | Galocatechin                             | Flavanols      | 48    | 8.19840  | 98    | 3-O-Methylgallic acid       |
| kz0030 |                                                        |                | 1.0 |         | km054  |                                          | 1.083          |       | kz0038   |       |                             |
| 38     | 3-O-(2-O-Acetyl-β-D-glucopyranosyl) oleanolic acid     | Terpenoids     | 9   | 3.36272 | 8      | Dihydroquercetin (Taxifolin)             | Flavonols      | 07    | 8.36915  | 09    | Sieboldin                   |
| kz0009 |                                                        |                | 1.0 |         | kz0045 |                                          | 1.082          |       | km126    |       |                             |
| 04     | Tiliroside                                             | Flavonols      | 9   | 3.37255 | 98     | 1,4-di-O-galloyl-β-D-glucose             | Phenolic acids | 97    | 9.74608  | 9     | Di-O-methylgallic acid      |
| kz0021 |                                                        |                | 1.0 |         | kz0009 |                                          | 1.066          |       | kz0000   |       |                             |
| 97     | 2'-Hydoxy,5-methoxy Genistein-4',7-O-diglucoside       | Isoflavones    | 5   | 3.43186 | 07     | Kaempferol-3-O-glucoside-7-O-rhamnoside  | Flavonols      | 50    | 10.02257 | 68    | Catechin                    |
| kz0051 |                                                        |                | 1.0 |         | kz0005 |                                          | 1.079          |       | kz0023   |       |                             |
| 32     | Luteolin-caffeoyl-O-rhamnoside                         | Flavones       | 9   | 3.43414 | 80     | 1,6-Di-O-Galloyl-D-Glucose               | Phenolic acids | 75    | 10.11315 | 37    | Luteolin                    |
| kz0021 |                                                        |                | 1.0 |         | kz0011 |                                          | 1.082          |       | kz0003   |       |                             |
| 64     | Isoluteolin (Orobol)(5,7,3',4'-tetrahydroxyisoflavone) | Isoflavones    | 6   | 3.45178 | 58     | D-Pantothenic Acid                       | Vitamins       | 55    | 10.49764 | 02    | 2-Isopropylmalate           |
| kz0051 |                                                        |                | 1.0 |         | kz0025 |                                          | 1.081          |       | kz0031   |       |                             |
| 98     | Poncirin(Isosakuranetin-7-neohesperidoside)            | Flavanones     | 9   | 3.46502 | 60     | 6-O-feruloyl-α-glucose                   | Phenolic acids | 82    | 10.58986 | 58    | Ailanthin                   |
| kz0022 |                                                        |                | 1.0 |         | kz0052 |                                          | 1.073          |       | kz0004   |       |                             |
| 23     | Eucommia                                               | Others         | 8   | 3.52995 | 25     | Luteolin 7-O-neohesperidoside(Lonicerin) | Flavones       | 51    | 10.97861 | 17    | Phloracetophenone           |
| kz0016 |                                                        |                | 1.0 |         | kz0029 |                                          | 1.074          |       | kz0037   |       |                             |
| 42     | 5'-Glucopyranosyloxyjasmanic acid                      | Phenolic acids | 9   | 3.65824 | 90     | Luteolin-7-O-rutinoside                  | Flavones       | 35    | 11.26988 | 55    | Quercetin                   |
| kz0038 |                                                        |                | 1.0 |         | kz0038 |                                          | 1.075          |       | kz0052   |       |                             |
| 72     | Lup-12-en-15α,19β-diol-3,11-dioxo-28-oic acid          | Terpenoids     | 9   | 3.68675 | 09     | Sieboldin                                | Chalcones      | 00    | 11.50213 | 00    | Hesperidin                  |
| kz0037 |                                                        |                | 1.0 |         | kz0001 |                                          | 1.083          |       | kz0001   |       |                             |
| 67     | Obtusilin                                              | Terpenoids     | 9   | 3.75492 | 90     | Arbutin                                  | Others         | 51    | 11.89655 | 97    | E-3,4-Dihydroxybenzoic acid |
| kz0005 |                                                        |                | 1.0 |         | kz0041 |                                          | 1.080          |       | kz0053   |       |                             |
| 33     | 2,5-Dihydroxy benzoic acid O-hexside                   | Phenolic acids | 8   | 3.77998 | 71     | Kaempferol 3-O-β-D-neohesperidoside      | Flavonols      | 66    | 12.40464 | 70    | (+)-Catechin                |
| kz0001 |                                                        |                | 1.0 |         | kz0005 |                                          | 1.084          |       | kz0018   |       |                             |
| 97     | E-3,4,5'-Trihydroxy-3'-glucopyranosylstilbene          | Others         | 5   | 3.81671 | 57     | Glucosyringic Acid                       | Phenolic acids | 53    | 12.48132 | 80    | ferulic acid                |
| kz0011 |                                                        |                | 1.0 |         | kz0009 |                                          | 1.083          |       | kz0031   |       |                             |
| 88     | Esculin(6,7-DihydroxyCoumarin-6-glucoside)             | Coumarins      | 7   | 3.92966 | 05     | Kaempferol-3-O-rutinoside(Nicotiflorin)  | Flavonols      | 99    | 12.59061 | 47    | Clenbutolol                 |
| kz0017 |                                                        |                | 1.0 |         | kz0004 |                                          | 1.083          |       | kz0016   |       |                             |
| 06     | Isololiolide                                           | Others         | 9   | 4.02706 | 12     | Aucubin                                  | Terpenoids     | 98    | 12.86942 | 37    | Orobol                      |
| km143  |                                                        |                | 1.0 |         | kz0009 |                                          | 1.084          |       | kz0052   |       |                             |
| 7      | p-Aminobenzoate                                        | Phenolic acids | 8   | 4.05827 | 06     | Kaempferol-3-O-robinobioside(Biorobin)   | Flavonols      | 53    | 13.11181 | 02    | Dihydroxyacetophenone       |
| kz0004 |                                                        |                | 1.0 |         | kz0031 |                                          | 1.084          |       | kz0037   |       |                             |
| 75     | 4-Hydroxybenzoic acid                                  | Phenolic acids | 9   | 4.06836 | 66     | 6-Hydroxy-7-methoxycoumarin              | Coumarins      | 51    | 13.40018 | 48    | 7'-O-Methylgallic acid      |
| kz0002 | 5-Aminolevulinate                                      | Alkaloids      | 1.0 | 4.19263 | kz0026 | Quercetin-3-O-(6''-O-acetyl)-galactoside | Flavonols      | 1.082 | 13.52593 | km057 | Epigallocatechin gallate    |

|        |                                           |                |     |          |        |                                                               |                |       |           |        |      |
|--------|-------------------------------------------|----------------|-----|----------|--------|---------------------------------------------------------------|----------------|-------|-----------|--------|------|
| 31     |                                           |                | 3   |          | 78     |                                                               |                | 37    |           | 3      |      |
| kz0009 |                                           |                | 1.0 |          | kz0000 |                                                               |                | 1.066 |           | kz0011 |      |
| 07     | Kaempferol-3-O-glucoside-7-O-rhamnoside   | Flavonols      | 4   | 4.46098  | 66     | Feruloyl syringic acid                                        | Phenolic acids | 42    | 15.59173  | 58     | D-P  |
| kz0033 |                                           |                | 1.0 |          | kz0005 |                                                               |                | 1.084 |           | kz0038 |      |
| 62     | Tubuloside C                              | Phenolic acids | 8   | 4.53828  | 40     | 3,4,5-Trimethoxyphenyl-β-D-Glucopyranoside                    | Phenolic acids | 75    | 16.12622  | 15     | Kae  |
| kz0041 |                                           |                | 1.0 |          | kz0005 |                                                               |                | 1.076 |           | kz0031 |      |
| 71     | Kaempferol 3-O-β-D-neohesperidoside       | Flavonols      | 8   | 4.75676  | 07     | Syringic Aldehyde                                             | Phenolic acids | 93    | 16.87097  | 51     | Aila |
| kz0016 |                                           |                | 1.0 |          | kz0026 |                                                               |                | 1.082 |           | kz0004 |      |
| 37     | Oresbiusin A                              | Phenolic acids | 9   | 4.91773  | 04     | Kaempferol-3-O-(6''-acetyl)-glucoside                         | Flavonols      | 18    | 19.48803  | 24     | Erio |
| kz0010 |                                           |                | 1.0 |          | kz0036 |                                                               |                | 1.081 |           | kz0012 |      |
| 84     | Ursolic acid                              | Terpenoids     | 8   | 4.95469  | 93     | Quercetin-3-O-(2-O-α-L-rhamnopyranosyl)-β-D-galactopyranoside | Flavonols      | 99    | 21.51981  | 98     | L-(+ |
| kz0029 |                                           |                | 1.0 |          | kz0000 |                                                               |                | 1.084 |           | kz0009 |      |
| 90     | Luteolin-7-O-rutinoside                   | Flavones       | 8   | 5.01229  | 55     | 3,4,5-Trimethoxycinnamic acid                                 | Phenolic acids | 74    | 28.30000  | 73     | Epig |
| kz0008 |                                           |                | 1.0 |          | kz0013 |                                                               |                | 1.079 |           | kz0046 |      |
| 86     | Myricetin-3-O-arabinoside                 | Flavonols      | 5   | 5.13683  | 80     | Quercetin-O-rutinoside-O-rhamnoside                           | Flavonols      | 72    | 30.39177  | 30     | 2α-  |
| km087  |                                           |                | 1.0 |          | kz0052 |                                                               |                | 1.084 |           | kz0051 |      |
| 9      | Orotic acid                               | Vitamins       | 9   | 5.56304  | 02     | Dihydrokaempferol                                             | Flavanols      | 65    | 31.64993  | 37     | Isos |
| kz0005 |                                           |                | 1.0 |          | kz0031 |                                                               |                | 1.083 |           | kz0030 |      |
| 05     | Coniferyl alcohol                         | Phenolic acids | 7   | 5.63649  | 51     | Ailantinol E                                                  | Others         | 78    | 36.44068  | 83     | 5,2' |
| kz0047 |                                           |                | 1.0 |          | kz0038 |                                                               |                | 1.081 |           | kz0005 |      |
| 56     | N-Benzylmethylene isomethylamine          | Alkaloids      | 6   | 5.99230  | 50     | (-)-secoisolariciresinol 4-O-β-D-giucopyranoside              | Lignans        | 58    | 58.96861  | 33     | 2,5- |
| kz0010 |                                           |                | 1.0 |          | kz0047 |                                                               |                | 1.079 |           | kz0012 |      |
| 25     | D-Glucurono-6,3-lactone                   | Others         | 9   | 6.15586  | 03     | secoisolariciresinol 9-O-β-D-glucopyranoside                  | Lignans        | 67    | 89.36559  | 03     | Indo |
| kz0046 |                                           |                | 1.0 |          | kz0009 |                                                               |                | 1.083 |           | kz0024 |      |
| 78     | Annuionone D                              | Others         | 9   | 6.24479  | 20     | Quercetin-O-rutinoside-hexose                                 | Flavonols      | 82    | 90.30000  | 85     | 3-m  |
| kz0037 |                                           |                | 1.0 |          | kz0010 |                                                               |                | 1.081 |           | kz0004 |      |
| 63     | Betulin                                   | Terpenoids     | 9   | 6.82881  | 14     | 1-Methylhistamine                                             | Others         | 72    | 109.82500 | 84     | Van  |
| kz0009 |                                           |                | 1.0 |          | kz0007 |                                                               |                | 1.083 |           | kz0009 |      |
| 06     | Kaempferol-3-O-robinobioside(Biorobin)    | Flavonols      | 9   | 6.83350  | 98     | Luteolin-7-O-glucuronide                                      | Flavones       | 73    | 116.37209 | 74     | Gall |
| kz0009 |                                           |                | 1.0 |          | kz0029 |                                                               |                | 1.084 |           | kz0037 |      |
| 05     | Kaempferol-3-O-rutinoside(Nicotiflorin)   | Flavonols      | 9   | 6.87266  | 76     | Scutellarin(Scutellarein-7-O-glucuronide)                     | Flavones       | 55    | 126.76617 | 18     | 2,3- |
| kz0015 |                                           |                | 1.0 |          | kz0002 |                                                               |                | 1.083 |           | kz0040 |      |
| 86     | Isotamarixin                              | Flavonols      | 8   | 6.96179  | 78     | Indole 3-acetic acid (IAA)                                    | Alkaloids      | 78    | 127.50000 | 35     | 3-In |
| kz0011 |                                           |                | 1.0 |          | kz0017 |                                                               |                | 1.083 |           | kz0011 |      |
| 03     | 6-Hydroxynicotinic acid                   | Alkaloids      | 8   | 7.14787  | 02     | Kaempferol-3-O-β-D-glucuronide                                | Flavonols      | 55    | 136.59794 | 99     | Indo |
| kz0026 |                                           |                | 1.0 |          | kz0007 |                                                               |                | 1.084 |           | kz0013 |      |
| 65     | Betulinic acid                            | Terpenoids     | 3   | 8.36538  | 97     | Tetahydroxy-flavone-7-O-β-D-glucuronide                       | Flavones       | 35    | 138.95170 | 19     | D-G  |
| kz0011 |                                           |                | 1.0 |          | kz0030 |                                                               |                | 1.083 |           | kz0005 |      |
| 13     | Lumichrome                                | Alkaloids      | 8   | 8.55081  | 98     | 3-O-Digalloyl quinic acid                                     | Phenolic acids | 05    | 215.55556 | 07     | Syri |
| kz0005 |                                           |                | 1.0 |          | kz0005 |                                                               |                | 1.084 |           | kz0010 |      |
| 44     | 3-O-p-Coumaroyl quinic acid               | Phenolic acids | 9   | 10.46030 | 96     | β-D-Furanofructosyl-α-D-(6-mustard acyl)glucoside             | Phenolic acids | 37    | 257.25000 | 84     | Urs  |
| kz0029 | Scutellarin(Scutellarein-7-O-glucuronide) | Flavones       | 1.0 | 11.30743 | kz0018 | vnilloylcaffeoyltartaric acid                                 | Phenolic acids | 1.084 | 263.00000 | kz0010 | Gall |

|        |                                                               |                |     |          |
|--------|---------------------------------------------------------------|----------------|-----|----------|
| 76     |                                                               |                | 9   |          |
| kz0007 |                                                               |                | 1.0 |          |
| 98     | Luteolin-7-O-glucuronide                                      | Flavones       | 9   | 11.79213 |
| kz0013 |                                                               |                | 1.0 |          |
| 19     | D-Galacturonic acid(Gal A)                                    | Organic acids  | 9   | 11.97323 |
| kz0050 |                                                               |                | 1.0 |          |
| 37     | Caffeoylferuloylshikimic?acid                                 | Phenolic acids | 9   | 12.41192 |
| kz0017 |                                                               |                | 1.0 |          |
| 02     | Kaempferol-3-O-β-D-glucuronide                                | Flavonols      | 9   | 13.84675 |
| kz0036 |                                                               |                | 1.0 |          |
| 93     | Quercetin-3-O-(2-O-α-L-rhamnopyranosyl)-β-D-galactopyranoside | Flavonols      | 9   | 14.14724 |
| kz0011 |                                                               |                | 1.0 |          |
| 99     | Indole-3-carboxaldehyde                                       | Alkaloids      | 9   | 14.82988 |
| kz0020 |                                                               |                | 1.0 |          |
| 65     | 4-α-L-Rhamnopyranosyl-ellagic acid                            | Phenolic acids | 9   | 15.09756 |
| kz0007 |                                                               |                | 1.0 |          |
| 97     | Tetahydroxy-flavone-7-O-β-D-glucuronide                       | Flavones       | 9   | 16.12777 |
| kz0012 |                                                               |                | 1.0 |          |
| 03     | Indole-3-carboxylic acid                                      | Alkaloids      | 9   | 17.49424 |
| kz0005 |                                                               |                | 1.0 |          |
| 15     | Sinapinaldehyde                                               | Phenolic acids | 9   | 17.95407 |
| kz0001 |                                                               |                | 1.0 |          |
| 45     | Formononetin                                                  | Isoflavones    | 9   | 18.39138 |
| kz0004 |                                                               |                | 1.0 |          |
| 66     | 4-Hydroxybenzaldehyde                                         | Phenolic acids | 9   | 18.50517 |
| kz0046 |                                                               |                | 1.0 |          |
| 67     | Myricetin-O-rhamnoside                                        | Flavonols      | 9   | 22.67361 |
| kz0010 |                                                               |                | 1.0 |          |
| 90     | Methoxyursolic acid                                           | Terpenoids     | 9   | 24.69359 |
| kz0013 |                                                               |                | 1.0 |          |
| 80     | Quercetin-O-rutinoside-O-rhamnoside                           | Flavonols      | 8   | 24.71264 |
| km093  |                                                               |                | 1.0 |          |
| 4      | Quercetin 4'-O-glucoside (Spiraeoside)                        | Flavonols      | 9   | 30.06167 |
| kz0029 |                                                               |                | 1.0 |          |
| 36     | Silibinin                                                     | Flavanols      | 9   | 32.20000 |
| kz0008 |                                                               |                | 1.0 |          |
| 90     | Quercetin-7-O-Glucoside                                       | Flavonols      | 9   | 32.38600 |
| kz0031 |                                                               |                | 1.0 |          |
| 66     | 6-Hydroxy-7-methoxycoumarin                                   | Coumarins      | 9   | 58.66864 |
| kz0005 |                                                               |                | 1.0 |          |
| 00     | Riboprine                                                     | Phenolic acids | 9   | 63.19018 |
| kz0044 | Luteolin-O-rutinoside-O-rhamnoside                            | Flavones       | 1.0 | 78.87500 |

|        |                                                            |                |       |           |
|--------|------------------------------------------------------------|----------------|-------|-----------|
| 64     |                                                            |                | 28    |           |
| kz0033 |                                                            |                | 1.083 |           |
| 62     | Tubuloside C                                               | Phenolic acids | 37    | 285.89909 |
| kz0000 |                                                            |                | 1.083 |           |
| 47     | Mandelic acid                                              | Phenolic acids | 96    | 431.75000 |
| kz0005 |                                                            |                | 1.084 |           |
| 17     | Sinapyl alcohol                                            | Phenolic acids | 58    | 483.50000 |
| kz0005 |                                                            |                | 1.085 |           |
| 05     | Coniferyl alcohol                                          | Phenolic acids | 01    | 502.00000 |
| kz0021 |                                                            |                | 1.084 |           |
| 44     | Angelicin                                                  | Coumarins      | 74    | 645.75000 |
| kz0005 |                                                            |                | 1.084 |           |
| 02     | Coniferaldehyde                                            | Phenolic acids | 75    | 699.25000 |
| kz0008 |                                                            |                | 1.084 | 1325.0000 |
| 72     | Myricetin                                                  | Flavonols      | 97    | 0         |
| kz0051 |                                                            |                | 1.084 | 1340.0000 |
| 33     | Luteolin-O-glucuronate-O-rhamnoside                        | Flavones       | 82    | 0         |
| kz0009 |                                                            |                | 1.084 | 1877.5000 |
| 19     | Robinin(Kaempferol-3-O-gal-rham-7-O-rham)                  | Flavonols      | 97    | 0         |
| kz0044 |                                                            |                | 1.084 | 1907.5000 |
| 25     | Luteolin-O-rutinoside-O-rhamnoside                         | Flavones       | 96    | 0         |
| kz0037 |                                                            |                | 1.084 | 2247.5000 |
| 97     | 3-Prenyl-4-O-β-D-glucopyranosyloxy-4-hydroxyl-benzoic acid | Phenolic acids | 92    | 0         |
| kz0022 |                                                            |                | 1.084 | 2572.5000 |
| 95     | Syringaresinol-4'-O-β-D-monO-glucoside                     | Lignans        | 70    | 0         |
| km143  |                                                            |                | 1.084 | 2955.0000 |
| 7      | p-Aminobenzoate                                            | Phenolic acids | 99    | 0         |
| kz0029 |                                                            |                | 1.084 | 5390.0000 |
| 12     | Santamarin                                                 | Terpenoids     | 92    | 0         |
| kz0029 |                                                            |                | 1.084 | 7915.0000 |
| 36     | Silibinin                                                  | Flavanols      | 99    | 0         |
| kz0000 |                                                            |                | 1.084 | 9030.0000 |
| 78     | 1'-O-β-D-(3,4-Dihydroxyphenethyl)-O-caffeoyl-glucoside     | Phenolic acids | 99    | 0         |
| kz0042 |                                                            |                | 1.085 | 18800.000 |
| 60     | Corosolic acid                                             | Terpenoids     | 00    | 00        |
| km093  |                                                            |                | 1.085 | 155750.00 |
| 6      | Quercetin 7-O-β-D-Glucuronide                              | Flavonols      | 01    | 000       |

|        |                                                        |
|--------|--------------------------------------------------------|
| 74     |                                                        |
| kz0007 |                                                        |
| 98     | Luteolin-7-O-glucuronide                               |
| kz0029 |                                                        |
| 76     | Scutellarein                                           |
| kz0007 |                                                        |
| 97     | Tetahydroxy-flavone-7-O-β-D-glucuronide                |
| kz0017 |                                                        |
| 02     | Kaempferol-3-O-β-D-glucuronide                         |
| kz0037 |                                                        |
| 96     | 1'-O-β-D-(3,4-Dihydroxyphenethyl)-O-caffeoyl-glucoside |
| kz0009 |                                                        |
| 14     | 6-Hydroxy-7-methoxycoumarin                            |
| kz0000 |                                                        |
| 52     | Ethyl 3,4-dihydroxybenzoate                            |
| kz0000 |                                                        |
| 55     | 3,4-Dihydroxybenzoic acid                              |
| kz0047 |                                                        |
| 03     | secoisobutyric acid                                    |
| kz0037 |                                                        |
| 28     | Geraniol                                               |
| kz0009 |                                                        |
| 20     | Quercetin 4'-O-glucoside (Spiraeoside)                 |
| kz0029 |                                                        |
| 75     | Acanthoside                                            |
| kz0010 |                                                        |
| 14     | 1-Methoxy-2-methyl-3-(4-methoxyphenyl)propan-1-one     |
| kz0008 |                                                        |
| 72     | Myricetin-O-rhamnoside                                 |
| kz0007 |                                                        |
| 33     | Delphinidin                                            |
| kz0005 |                                                        |
| 75     | 3,5-Dihydroxybenzoic acid                              |
| kz0047 |                                                        |
| 68     | monoterpene                                            |
| kz0045 |                                                        |
| 95     | Geraniol                                               |
| kz0035 |                                                        |
| 04     | Geraniol                                               |
| kz0010 |                                                        |
| 76     | Ethyl 3,4-dihydroxybenzoate                            |
| kz0029 | Saniclorin                                             |

| RSS-F/RSL-F |           |       |         |                    | RLM-F/RDP-F |           |       |         |                    | RLM-F/RSL-F |           |       |         |                    | RDP-F/RSL-F |           |       |         |                    |
|-------------|-----------|-------|---------|--------------------|-------------|-----------|-------|---------|--------------------|-------------|-----------|-------|---------|--------------------|-------------|-----------|-------|---------|--------------------|
| Ind<br>ex   | Compounds | Class | VI<br>P | Fold<br>_Ch<br>ang | Ind<br>ex   | Compounds | Class | VI<br>P | Fold<br>_Ch<br>ang | Ind<br>ex   | Compounds | Class | VI<br>P | Fold<br>_Ch<br>ang | Ind<br>ex   | Compounds | Class | VI<br>P | Fold<br>_Ch<br>ang |

| e   |                                   |        |         | e   |                               |        |         | e   |                               |        |         | e   |                            |        |         |
|-----|-----------------------------------|--------|---------|-----|-------------------------------|--------|---------|-----|-------------------------------|--------|---------|-----|----------------------------|--------|---------|
| kz0 |                                   | 1.     |         | kz0 |                               | 1.     |         | kz0 |                               | 1.     |         | kz0 |                            | 1.     |         |
| 05  | Pheno                             | 07     |         | 03  | Pheno                         | 07     |         | 01  | Proant                        | 08     |         | 01  | Proant                     | 09     |         |
| 04  | lic                               | 38     | 0.00    | 79  | lic                           | 11     | 0.00    | 33  | hocya                         | 18     | 0.00    | 33  | hocya                      | 24     | 0.00    |
| 9   | Salireposide                      | acids  | 7 005   | 4   | Syringic Aldehyde-glucoside   | acids  | 6 041   | 2   | Procyanidin B2                | nidins | 9 005   | 2   | Procyanidin B2             | nidins | 7 008   |
| kz0 |                                   | 1.     |         | kz0 |                               | 1.     |         | kz0 |                               | 1.     |         | kz0 |                            | 1.     |         |
| 04  | 7S,8R-threo-3',9,9'-trihydroxy-3- |        | 07      | 03  | 3-Prenyl-4-O-β-D-             | Pheno  | 07      | 04  |                               | 08     |         | 01  | Proant                     | 09     |         |
| 69  | methoxy-4',7-epoxy-neolignan-     | Lignan | 40 0.00 | 79  | glucopyranosyloxy-4-hydroxyl- | lic    | 13 0.00 | 26  | Terpe                         | 19     | 0.00    | 33  | hocya                      | 24     | 0.00    |
| 8   | 4-O-α-L-rhamnopyranoside          | s      | 0 006   | 7   | benzoic acid                  | acids  | 1 044   | 0   | Corosolic acid                | noids  | 2 005   | 5   | Procyanidin B1             | nidins | 8 010   |
| kz0 |                                   | 1.     |         | kz0 |                               | 1.     |         | kz0 |                               | 1.     |         | kz0 |                            | 1.     |         |
| 00  | Pheno                             | 07     |         | 04  |                               | 07     |         | 01  | Proant                        | 08     |         | 01  | Proant                     | 09     |         |
| 53  | lic                               | 33     | 0.00    | 42  | Luteolin-O-rutinoside-O-      | Flavon | 14 0.00 | 33  | hocya                         | 18     | 0.00    | 33  | hocya                      | 24     | 0.00    |
| 0   | Brevifolin carboxylic acid        | acids  | 3 021   | 5   | rhamnoside                    | es     | 4 052   | 5   | Procyanidin B1                | nidins | 7 006   | 3   | Procyanidin B3             | nidins | 7 011   |
| kz0 |                                   | 1.     |         | kz0 |                               | 1.     |         | kz0 |                               | 1.     |         | kz0 |                            | 1.     |         |
| 01  | Proant                            | 07     |         | 00  |                               | 07     |         | 01  | Proant                        | 08     |         | 00  | Pheno                      | 09     |         |
| 33  | hocya                             | 39     | 0.00    | 91  | Robinin(Kaempferol-3-O-gal-   | Flavon | 14 0.00 | 33  | hocya                         | 18     | 0.00    | 53  | lic                        | 19     | 0.00    |
| 2   | Procyanidin B2                    | nidins | 9 022   | 9   | rham-7-O-rham)                | ols    | 7 053   | 3   | Procyanidin B3                | nidins | 8 006   | 0   | Brevifolin carboxylic acid | acids  | 4 019   |
| kz0 |                                   | 1.     |         | kz0 |                               | 1.     |         | kz0 |                               | 1.     |         | kz0 |                            | 1.     |         |
| 00  | Antho                             | 07     |         | 05  |                               | 07     |         | 04  |                               | 08     |         | 00  | Antho                      | 09     |         |
| 70  | cyanin                            | 39     | 0.00    | 13  | Luteolin-O-glucuronate-O-     | Flavon | 11 0.00 | 70  | secoisolariciresinol 9-O-β-D- | Lignan | 18 0.00 | 70  | cyanin                     | 24     | 0.00    |
| 4   | Cyanidin-O-syringic acid          | s      | 3 025   | 3   | rhamnoside                    | es     | 8 075   | 3   | glucopyranoside               | s      | 4 020   | 4   | Cyanidin-O-syringic acid   | s      | 9 020   |
| kz0 |                                   | 1.     |         | kz0 |                               | 1.     |         | kz0 |                               | 1.     |         | kz0 |                            | 1.     |         |
| 01  | Proant                            | 07     |         | 02  |                               | 07     |         | 00  | Pheno                         | 08     |         | 00  |                            | 09     |         |
| 33  | hocya                             | 39     | 0.00    | 14  |                               | Coum   | 10 0.00 | 59  | lic                           | 19     | 0.00    | 97  | Flavan                     | 25     | 0.00    |
| 5   | Procyanidin B1                    | nidins | 7 028   | 4   | Angelicin                     | arins  | 9 155   | 2   | Rosmarinyl Glucoside          | acids  | 4 024   | 4   | Gallocatechin              | ols    | 3 027   |
| kz0 |                                   | 1.     |         | kz0 |                               | 1.     |         | kz0 |                               | 1.     |         | kz0 |                            | 1.     |         |
| 01  | Proant                            | 07     |         | 05  |                               | Pheno  | 07      | 00  |                               | Antho  | 08      | 04  |                            | 09     |         |
| 33  | hocya                             | 39     | 0.00    | 04  |                               | lic    | 12 0.00 | 70  |                               | cyanin | 19 0.00 | 26  | Terpe                      | 23     | 0.00    |
| 3   | Procyanidin B3                    | nidins | 5 030   | 9   | Salireposide                  | acids  | 2 185   | 4   | Cyanidin-O-syringic acid      | s      | 4 024   | 0   | Corosolic acid             | noids  | 6 028   |
| kz0 |                                   | 1.     |         | kz0 |                               | 1.     |         | kz0 |                               | 1.     |         | kz0 |                            | 1.     |         |
| 03  |                                   | 07     |         | 04  | Quercetin 3-O-β-D-            |        | 07      | 03  |                               | Pheno  | 08      | 00  |                            | Antho  | 09      |
| 86  | 3β-Hydroxy-28-norurs-17,19,21-    | Terpe  | 37 0.00 | 17  | xylopyranosyl(1→2)-β-D-       | Flavon | 14 0.00 | 79  |                               | lic    | 15 0.00 | 70  | Delphinidin-3-O-           | cyanin | 07 0.00 |
| 2   | trien                             | noids  | 6 038   | 2   | galactopyranoside             | ols    | 4 193   | 4   | Syringic Aldehyde-glucoside   | acids  | 9 041   | 3   | glucoside (Mirtillin)      | s      | 3 029   |
| kz0 |                                   | 1.     |         |     |                               | 1.     |         | kz0 |                               | 1.     |         | kz0 |                            | 1.     |         |
| 05  |                                   | 07     |         | km  |                               | 07     |         | 01  | Proant                        | 08     |         | 04  |                            | 09     |         |
| 37  | lyoniresinol-9'-O-β-D-            | Lignan | 39 0.00 | 08  | Myricetin 3-O-rhamnoside      | Flavon | 09 0.00 | 34  |                               | hocya  | 19 0.00 | 70  | secoisolariciresinol 9-O-  | Lignan | 23 0.00 |
| 7   | xylopyranoside                    | s      | 6 039   | 18  | (Myricitrin)                  | ols    | 4 467   | 0   | Procyanidin C2                | nidins | 3 044   | 3   | β-D-glucopyranoside        | s      | 8 032   |
| kz0 |                                   | 1.     |         | kz0 |                               | 1.     |         | kz0 |                               | 1.     |         | kz0 |                            | 1.     |         |
| 00  | Antho                             | 07     |         | 01  |                               | 07     |         | 00  |                               | 08     |         | 03  | Kampferol 3-O-(6''-        |        | 09      |
| 70  | Delphinidin-3-O-glucoside         | cyanin | 39 0.00 | 17  |                               | Coum   | 05 0.00 | 97  |                               | Flavan | 18 0.00 | 82  | galloyl)-β-D-              | Flavon | 22 0.00 |
| 3   | (Mirtillin)                       | s      | 2 057   | 7   | Scoparone                     | arins  | 7 496   | 4   | Gallocatechin                 | ols    | 9 056   | 1   | galactopyranoside          | ols    | 1 038   |
| kz0 | Homogentisic acid                 | Pheno  | 1. 0.00 | kz0 | Quercetin-O-pentosyl-O-       | Flavon | 1. 0.00 | kz0 | Sieboldin                     | Chalco | 1. 0.00 | kz0 | Kampferol 3-O-(2''-        | Flavon | 1. 0.00 |

|     |                                   |        |    |      |     |                               |         |    |      |     |                           |        |    |      |     |                        |         |       |      |      |
|-----|-----------------------------------|--------|----|------|-----|-------------------------------|---------|----|------|-----|---------------------------|--------|----|------|-----|------------------------|---------|-------|------|------|
| 00  |                                   | lic    | 07 | 083  | 03  | rhamnoside-O-glucoside        | ols     | 06 | 748  | 03  |                           | nes    | 08 | 064  | 03  | galloyl)-β-D-          | ols     | 09    | 040  |      |
| 05  |                                   | acids  | 37 |      | 83  |                               |         | 58 |      | 80  |                           |        | 16 |      | 82  | galactopyranoside      |         | 24    |      |      |
| 0   |                                   |        | 9  |      | 3   |                               |         | 9  |      | 9   |                           |        | 7  |      | 3   |                        |         | 5     |      |      |
| kz0 |                                   |        | 1. |      | kz0 |                               |         | 1. |      | kz0 |                           |        | 1. |      | kz0 |                        |         | 1.    |      |      |
| 04  |                                   |        | 07 |      | 03  |                               |         | 07 |      | 02  |                           | Pheno  | 08 |      | 00  |                        |         | 09    |      |      |
| 77  | (2R)-Pinocembrin-7-               | Flavan | 39 | 0.00 | 16  |                               | Coum    | 14 | 0.01 | 55  | 4-O-glucosyl-3,4-         | lic    | 18 | 0.00 | 97  |                        | Flavan  | 24    | 0.00 |      |
| 4   | neohesperidoside                  | ones   | 1  | 084  | 6   | 6-Hydroxy-7-methoxycoumarin   | arins   | 4  | 828  | 7   | dihydroxybenzyl alcohol   | acids  | 6  | 070  | 3   | Epigallocatechin (EGC) | ols     | 1     | 046  |      |
| kz0 |                                   |        | 1. |      | kz0 |                               |         | 1. |      | kz0 |                           |        | 1. |      | kz0 |                        |         | 1.    |      |      |
| 03  |                                   | Pheno  | 07 |      | 03  |                               | Pheno   | 07 |      | 05  |                           |        | 08 |      | 00  |                        | Pheno   | 09    |      |      |
| 71  | Maplexin C (2,3-Di-O-Galloyl-1,5- | lic    | 37 | 0.00 | 36  |                               | lic     | 12 | 0.01 | 13  | Luteolin-O-glucuronate-O- | Flavon | 17 | 0.00 | 59  |                        | lic     | 21    | 0.00 |      |
| 7   | Anhydro-D-Glucitol)               | acids  | 8  | 089  | 2   | Tubuloside C                  | acids   | 3  | 984  | 3   | rhamnoside                | es     | 2  | 075  | 2   | Rosmarinyl Glucoside   | acids   | 1     | 068  |      |
| kz0 |                                   |        | 1. |      | kz0 |                               |         | 1. |      | kz0 |                           |        | 1. |      | kz0 |                        |         | 1.    |      |      |
| 02  |                                   |        | 07 |      | 03  | Quercetin-3-O-(2-O-α-L-       |         | 06 |      | 00  |                           |        | 08 |      | 00  |                        |         | 09    |      |      |
| 82  |                                   | Flavon | 37 | 0.00 | 69  | rhamnopyranosyl)-β-D-         | Flavon  | 88 | 0.03 | 87  |                           | Flavon | 19 | 0.00 | 18  | 2-Deoxyribose          | 1-      | Other | 24   | 0.00 |
| 0   | Limocitrin 7-glucoside            | ols    | 6  | 091  | 3   | galactopyranoside             | ols     | 7  | 826  | 2   | Myricetin                 | ols    | 1  | 075  | 6   | phosphate              | s       | 6     | 079  |      |
| kz0 |                                   |        | 1. |      | kz0 |                               |         | 1. |      | kz0 |                           |        | 1. |      | kz0 |                        |         | 1.    |      |      |
| 01  |                                   |        | 07 |      | 01  |                               |         | 06 |      | 00  |                           |        | 08 |      | 03  |                        |         | 09    |      |      |
| 19  |                                   | Coum   | 38 | 0.00 | 38  | Quercetin-O-rutinoside-O-     | Flavon  | 65 | 0.04 | 97  |                           | Flavan | 19 | 0.00 | 80  |                        | Chalco  | 24    | 0.00 |      |
| 1   | 4-hydroxycoumarin di-glucoside    | arins  | 8  | 092  | 0   | rhamnoside                    | ols     | 0  | 176  | 3   | Epigallocatechin (EGC)    | ols    | 2  | 087  | 9   | Sieboldin              | nes     | 0     | 079  |      |
| kz0 |                                   |        | 1. |      | kz0 |                               |         | 1. |      | kz0 |                           |        | 1. |      | kz0 |                        |         | 1.    |      |      |
| 02  |                                   | Pheno  | 07 |      | 03  |                               | Pheno   | 06 |      | 00  |                           | Antho  | 07 |      | 03  | Maplexin C (2,3-Di-O-  | Pheno   | 09    |      |      |
| 55  |                                   | lic    | 34 | 0.00 | 09  |                               | lic     | 97 | 0.04 | 70  | Delphinidin-3-O-glucoside | cyanin | 73 | 0.00 | 71  | Galloyl-1,5-Anhydro-D- | lic     | 18    | 0.00 |      |
| 1   | Isosinapic acid-hexoside          | acids  | 6  | 103  | 8   | 3-O-Digalloyl quinic acid     | acids   | 3  | 336  | 3   | (Mirtillin)               | s      | 8  | 114  | 7   | Glucitol)              | acids   | 0     | 084  |      |
|     |                                   |        | 1. |      | kz0 |                               |         | 1. |      | kz0 |                           |        | 1. |      | kz0 |                        |         | 1.    |      |      |
| km  |                                   |        | 07 |      | 02  |                               |         | 06 |      | 02  |                           | Pheno  | 08 |      | 00  |                        | Pheno   | 09    |      |      |
| 06  | Hesperetin                        | Flavan | 38 | 0.00 | 91  |                               | Terpe   | 71 | 0.05 | 55  |                           | lic    | 19 | 0.00 | 54  | 1-O-p-Coumaroyl quinic | lic     | 24    | 0.00 |      |
| 40  | (Hesperidin)                      | ones   | 7  | 110  | 2   | Santamarin                    | noids   | 0  | 798  | 1   | Isosinapic acid-hexoside  | acids  | 0  | 135  | 6   | acid                   | acids   | 6     | 085  |      |
| kz0 |                                   |        | 1. |      | kz0 |                               |         | 1. |      | kz0 |                           |        | 1. |      | kz0 |                        |         | 1.    |      |      |
| 00  |                                   | Pheno  | 07 |      | 02  |                               |         | 07 |      | 02  |                           |        | 08 |      | 00  |                        | Pheno   | 09    |      |      |
| 54  |                                   | lic    | 38 | 0.00 | 93  |                               | Flavan  | 10 | 0.07 | 14  |                           | Coum   | 16 | 0.00 | 51  |                        | lic     | 24    | 0.00 |      |
| 6   | 1-O-p-Coumaroyl quinic acid       | acids  | 6  | 110  | 6   | Silibinin                     | ols     | 1  | 037  | 4   | Angelicin                 | arins  | 0  | 155  | 7   | Sinapyl alcohol        | acids   | 3     | 085  |      |
| kz0 |                                   |        | 1. |      | kz0 |                               |         | 1. |      | kz0 |                           |        | 1. |      | kz0 |                        |         | 1.    |      |      |
| 02  |                                   |        | 07 |      | 01  |                               |         | 07 |      | 00  |                           | Pheno  | 08 |      | 00  |                        |         | 09    |      |      |
| 20  |                                   | Flavan | 39 | 0.00 | 31  |                               | Organi  | 12 | 0.07 | 55  |                           | lic    | 09 | 0.00 | 03  |                        | Alkaloi | 25    | 0.00 |      |
| 2   | Farrerol 7-O-glucoside            | ones   | 7  | 118  | 8   | Quinic Acid                   | c acids | 1  | 125  | 5   | 1-Caffeoylquinic acid     | acids  | 6  | 167  | 2   | Caffeoylagmatine       | ds      | 3     | 094  |      |
| kz0 |                                   |        | 1. |      | kz0 |                               |         | 1. |      | kz0 |                           |        | 1. |      | kz0 |                        |         | 1.    |      |      |
| 00  |                                   | Pheno  | 07 |      | 00  |                               |         | 06 |      | 00  |                           | Pheno  | 08 |      | 00  |                        |         | 09    |      |      |
| 55  | Neochlorogenic acid(5-O-          | lic    | 35 | 0.00 | 90  | Kaempferol-3-O-glucoside-7-O- | Flavon  | 22 | 0.08 | 05  |                           | lic    | 09 | 0.00 | 41  |                        | Chalco  | 23    | 0.00 |      |
| 3   | Caffeoylquinic acid)              | acids  | 5  | 119  | 7   | rhamnoside                    | ols     | 5  | 636  | 0   | Homogentisic acid         | acids  | 3  | 172  | 9   | Phlorizin              | nes     | 4     | 094  |      |
| kz0 |                                   |        | 1. |      | kz0 |                               | Pheno   | 1. |      | kz0 |                           |        | 1. |      | kz0 |                        | Pheno   | 1.    |      |      |
| 02  |                                   | Flavon | 07 | 0.00 | 04  |                               | lic     | 06 | 0.08 | 03  |                           | Terpe  | 08 | 0.00 | 00  | Neochlorogenic acid(5- | lic     | 09    | 0.00 |      |
| 97  | Pratensein 7-O-glucopyranoside    | es     | 40 | 142  | 59  | 1,4-di-O-galloyl-β-D-glucose  | acids   | 48 | 697  | 37  | Swertiamarin              | noids  | 15 | 185  | 55  | O-Caffeoylquinic acid) | acids   | 22    | 096  |      |



|     |                                  |        |    |      |     |                                   |        |    |      |       |                               |        |      |       |                          |                          |           |       |      |     |
|-----|----------------------------------|--------|----|------|-----|-----------------------------------|--------|----|------|-------|-------------------------------|--------|------|-------|--------------------------|--------------------------|-----------|-------|------|-----|
| 8   |                                  |        | 2  |      | 8   |                                   | 9      |    | 0    |       | 1                             |        | 3    |       | 9                        |                          |           |       |      |     |
| kz0 |                                  |        | 1. |      | kz0 |                                   | 1.     |    | kz0  |       | 1.                            |        | kz0  |       | 1.                       |                          |           |       |      |     |
| 00  |                                  |        | 07 |      | 02  |                                   | 07     |    | 05   | Pheno | 08                            |        | 00   | Pheno | 09                       |                          |           |       |      |     |
| 18  |                                  | Other  | 39 | 0.00 | 67  | Quercetin-3-O-(6''-O-acetyl)-     | Flavon | 12 | 0.09 | 04    | lic                           | 16     | 0.00 | 05    | lic                      | 25                       | 0.00      |       |      |     |
| 6   | 2-Deoxyribose 1-phosphate        | s      | 3  | 143  | 8   | galactoside                       | ols    | 1  | 343  | 9     | Salireposide                  | acids  | 4    | 185   | 0                        | Homogentisic acid        | acids     | 3     | 102  |     |
| kz0 |                                  |        | 1. |      | kz0 |                                   | 1.     |    | kz0  |       | 1.                            |        | kz0  |       | 1.                       |                          |           |       |      |     |
| 03  |                                  |        | 07 |      | 02  |                                   | 06     |    | 00   | Pheno | 08                            |        | 00   |       | Pheno                    | 09                       |           |       |      |     |
| 82  | Kampferol 3-O-(2''-galloyl)-β-D- | Flavon | 38 | 0.00 | 99  |                                   | Flavon | 49 | 0.09 | 51    | lic                           | 15     | 0.00 | 61    | 1,3,4,6-Tetra-O-Galloyl- | lic                      | 09        | 0.00  |      |     |
| 3   | galactopyranoside                | ols    | 7  | 150  | 0   | Luteolin-7-O-rutinoside           | es     | 0  | 770  | 7     | Sinapyl alcohol               | acids  | 2    | 207   | 2                        | D-Glucose                | acids     | 6     | 103  |     |
| kz0 |                                  |        | 1. |      | kz0 |                                   | 1.     |    | kz0  |       | 1.                            |        | kz0  |       | 1.                       |                          |           |       |      |     |
| 00  |                                  | Pheno  | 07 |      | 00  |                                   |        | 07 |      | 02    |                               | 08     |      | 00    |                          |                          | 09        |       |      |     |
| 55  |                                  | lic    | 38 | 0.00 | 90  | Kaempferol-3-O-                   | Flavon | 04 | 0.10 | 36    |                               | Other  | 16   | 0.00  | 20                       |                          | Other     | 24    | 0.00 |     |
| 5   | 1-Caffeoylquinic acid            | acids  | 9  | 154  | 5   | rutinoside(Nicotiflorin)          | ols    | 5  | 020  | 7     | Methyl dioxindole-3-acetate   | s      | 8    | 316   | 7                        | Cannabiscitrin           | s         | 1     | 105  |     |
|     |                                  |        | 1. |      | kz0 |                                   | 1.     |    | kz0  |       | 1.                            |        | kz0  |       | 1.                       |                          |           |       |      |     |
| km  |                                  |        | 07 |      | 00  |                                   | 07     |    | 03   |       | Pheno                         | 08     |      | 03    |                          | Pheno                    | 09        |       |      |     |
| 08  | Myricetin 3-O-rhamnoside         | Flavon | 38 | 0.00 | 90  | Kaempferol-3-O-                   | Flavon | 07 | 0.10 | 63    | lic                           | 16     | 0.00 | 63    |                          | lic                      | 23        | 0.00  |      |     |
| 18  | (Myricitrin)                     | ols    | 5  | 156  | 6   | robinobioside(Biorobin)           | ols    | 0  | 134  | 6     | Plantainoside A               | acids  | 1    | 342   | 6                        | Plantainoside A          | acids     | 3     | 106  |     |
| kz0 |                                  |        | 1. |      | kz0 |                                   | 1.     |    | kz0  |       | 1.                            |        | kz0  |       | 1.                       |                          |           |       |      |     |
| 03  |                                  | Pheno  | 07 |      | 05  |                                   | 06     |    | 01   |       | Pheno                         | 08     |      | 02    |                          | Pheno                    | 09        |       |      |     |
| 71  | Maplexin D (2,4-Di-O-Galloyl-    | lic    | 31 | 0.00 | 22  | Luteolin 7-O-                     | Flavon | 54 | 0.10 | 86    | lic                           | 11     | 0.00 | 55    | 4-O-glucosyl-3,4-        | lic                      | 24        | 0.00  |      |     |
| 6   | 1,5-Anhydro-D-Glucitol)          | acids  | 8  | 156  | 5   | neohesperidoside(Lonicerin)       | es     | 5  | 190  | 4     | vnilloylcaffeoyltartaric acid | acids  | 4    | 380   | 7                        | dihydroxybenzyl alcohol  | acids     | 8     | 110  |     |
| kz0 |                                  |        | 1. |      | kz0 |                                   | 1.     |    | kz0  |       | 1.                            |        | kz0  |       | 1.                       |                          |           |       |      |     |
| 01  |                                  | Pheno  | 07 |      | 04  |                                   | 06     |    | 04   |       | 08                            |        | 05   |       | 09                       |                          |           |       |      |     |
| 82  |                                  | lic    | 38 | 0.00 | 17  | Kaempferol 3-O-β-D-               | Flavon | 59 | 0.10 | 77    | (2R)-Pinocembrin-7-           | Flavan | 19   | 0.00  | 37                       | lyoniresinol-9'-O-β-D-   | Lignan    | 24    | 0.00 |     |
| 4   | cinnamoyltartaric acid           | acids  | 8  | 168  | 1   | neohesperidoside                  | ols    | 5  | 541  | 4     | neohesperidoside              | ones   | 0    | 396   | 7                        | xylopyranoside           | s         | 5     | 115  |     |
| kz0 |                                  |        | 1. |      | kz0 |                                   | 1.     |    | kz0  |       | 1.                            |        | kz0  |       | 1.                       |                          |           |       |      |     |
| 03  |                                  |        | 07 |      | 00  |                                   | 06     |    | 02   |       | 08                            |        | 03   |       | 09                       |                          |           |       |      |     |
| 82  | Kampferol 3-O-(6''-galloyl)-β-D- | Flavon | 39 | 0.00 | 87  |                                   | Flavon | 84 | 0.11 | 93    |                               | Flavan | 17   | 0.00  | 71                       | Maplexin D (2,4-Di-O-    | Pheno     | 09    |      |     |
| 1   | galactopyranoside                | ols    | 5  | 172  | 2   | Myricetin                         | ols    | 5  | 547  | 6     | Silibinin                     | ols    | 7    | 407   | 6                        | Galloyl-1,5-Anhydro-D-   | lic       | 03    | 0.00 |     |
| kz0 |                                  |        | 1. |      | kz0 |                                   | 1.     |    | kz0  |       | 1.                            |        | kz0  |       | 1.                       |                          | Glucitol) | acids | 9    | 125 |
| 03  |                                  | Pheno  | 07 |      | 00  |                                   | Pheno  | 06 |      | km    |                               | 08     |      | 00    |                          | Pheno                    | 09        |       |      |     |
| 79  |                                  | lic    | 30 | 0.00 | 58  |                                   | lic    | 48 | 0.11 | 08    | Myricetin 3-O-rhamnoside      | Flavon | 12   | 0.00  | 55                       |                          | lic       | 25    | 0.00 |     |
| 4   | Syringic Aldehyde-glucoside      | acids  | 6  | 182  | 0   | 1,6-Di-O-Galloyl-D-Glucose        | acids  | 3  | 953  | 18    | (Myricitrin)                  | ols    | 4    | 467   | 5                        | 1-Caffeoylquinic acid    | acids     | 2     | 128  |     |
| kz0 |                                  |        | 1. |      | kz0 |                                   | 1.     |    | kz0  |       | 1.                            |        | kz0  |       | 1.                       |                          |           |       |      |     |
| 03  |                                  | Pheno  | 07 |      | 03  |                                   | 07     |    | 00   |       | 07                            |        | 03   |       | 09                       |                          |           |       |      |     |
| 63  |                                  | lic    | 35 | 0.00 | 85  | (-)-secoisolariciresinol 4-O-β-D- | Lignan | 04 | 0.12 | 97    |                               | Flavan | 96   | 0.00  | 14                       |                          | Lignan    | 22    | 0.00 |     |
| 6   | Plantainoside A                  | acids  | 9  | 185  | 0   | giucopyranoside                   | s      | 0  | 586  | 1     | Catechin                      | ols    | 4    | 476   | 7                        | Clemaphenol A            | s         | 4     | 131  |     |
| kz0 |                                  |        | 1. |      | kz0 |                                   | 1.     |    | kz0  |       | 1.                            |        | kz0  |       | 1.                       |                          |           |       |      |     |
| 00  |                                  | Pheno  | 07 |      | 01  |                                   | 07     |    | 01   |       | Proant                        | 07     |      | 01    |                          | Pheno                    | 09        |       |      |     |
| 59  |                                  | lic    | 29 | 0.00 | 02  |                                   | Other  | 07 | 0.13 | 33    |                               | hocya  | 81   | 0.00  | 86                       | vnilloylcaffeoyltartaric | lic       | 22    | 0.00 |     |
| 2   | Rosmarinyl Glucoside             | acids  | 4  | 188  | 0   | 4-Methyl-5-thiazoleethanol        | s      | 8  | 333  | 1     | Procyanidin A1                | nidins | 4    | 564   | 4                        | acid                     | acids     | 7     | 150  |     |
| kz0 | Procyanidin A1                   | Proant | 1. | 0.00 | kz0 | (2R)-Pinocembrin-7-               | Flavan | 1. | 0.18 | kz0   | Neochlorogenic acid(5-O-      | Pheno  | 1.   | 0.00  | kz0                      | Procyanidin C2           | Proant    | 1.    | 0.00 |     |



|     |                                  |         |      |      |                                |                               |         |      |      |                                   |                            |        |       |      |                          |                         |        |      |      |
|-----|----------------------------------|---------|------|------|--------------------------------|-------------------------------|---------|------|------|-----------------------------------|----------------------------|--------|-------|------|--------------------------|-------------------------|--------|------|------|
| 7   |                                  | 8       |      | 2    |                                | 1                             |         | 2    |      | 8                                 |                            | 0      |       | 6    |                          |                         |        |      |      |
| kz0 |                                  | 1.      |      | kz0  |                                | 1.                            |         | kz0  |      | 1.                                |                            | kz0    |       | 1.   |                          |                         |        |      |      |
| 02  |                                  | 07      |      | 02   |                                | 03                            |         | 03   |      | 08                                |                            | 04     | Pheno | 09   |                          |                         |        |      |      |
| 66  |                                  | 39      | 0.00 | 19   | 2'-Hydoxy,5-methoxy Genistein- | Isoflav                       | 42      | 0.27 | 85   | (-)-secoisolariciresinol 4-O-β-D- | Lignan                     | 15     | 0.03  | 76   | lic                      | 22                      | 0.00   |      |      |
| 8   | Ovalifoliolides B                | noids   | 9    | 597  | 6 O-rhamnosyl-glucoside        | ones                          | 3       | 416  | 0    | giucopyranoside                   | s                          | 4      | 856   | 8    | monogalloyl-diglucose    | acids                   | 2      | 507  |      |
| kz0 |                                  | 1.      |      | kz0  |                                | 1.                            |         | kz0  |      | 1.                                |                            | kz0    |       | 1.   |                          |                         |        |      |      |
| 00  |                                  | 07      |      | 00   |                                | Pheno                         | 07      |      | 04   |                                   | 07                         | 00     |       | 00   | Pheno                    | 09                      |        |      |      |
| 97  |                                  | 30      | 0.00 | 55   |                                | lic                           | 05      | 0.27 | 42   | Luteolin-O-rutinoside-O-          | Flavon                     | 45     | 0.04  | 57   | 3,5-Di-O-galloylshikimic | lic                     | 21     | 0.00 |      |
| 3   | Epigallocatechin (EGC)           | ols     | 9    | 608  | 7 Glucosyringic Acid           | acids                         | 8       | 987  | 5    | rhamnoside                        | es                         | 5      | 135   | 5    | acid                     | acids                   | 3      | 559  |      |
| kz0 |                                  | 1.      |      | kz0  |                                | 1.                            |         | kz0  |      | 1.                                |                            | kz0    |       | 1.   |                          |                         |        |      |      |
| 00  |                                  | 07      |      | 00   |                                | Pheno                         | 07      |      | 01   |                                   | 08                         | 03     |       | 03   | Pheno                    | 08                      |        |      |      |
| 41  |                                  | 28      | 0.00 | 54   | 3,4,5-Trimethoxyphenyl-β-D-    | lic                           | 01      | 0.28 | 02   |                                   | Other                      | 17     | 0.04  | 10   |                          | lic                     | 81     | 0.00 |      |
| 9   | Phlorizin                        | nes     | 9    | 617  | 0 Glucopyranoside              | acids                         | 8       | 576  | 0    | 4-Methyl-5-thiazoleethanol        | s                          | 0      | 757   | 6    | Cuspinin                 | acids                   | 2      | 573  |      |
| kz0 |                                  | 1.      |      | kz0  |                                | 1.                            |         | kz0  |      | 1.                                |                            | kz0    |       | 1.   |                          |                         |        |      |      |
| 05  |                                  | 07      |      | 00   |                                | 06                            |         | 00   |      | Pheno                             | 08                         | 00     |       | 00   |                          |                         |        |      |      |
| 37  | 5'-methoxyisolariciresinol-9'-O- | Lignan  | 29   | 0.00 | 79                             | Tetahydroxy-flavone-7-O-β-D-  | Flavon  | 95   | 0.28 | 55                                |                            | lic    | 00    | 0.04 | 87                       |                         | Flavon | 23   | 0.00 |
| 6   | β-D-xylopyranoside               | s       | 5    | 624  | 7 glucuronide                  | es                            | 5       | 735  | 7    | Glucosyringic Acid                | acids                      | 6      | 779   | 2    | Myricetin                | ols                     | 3      | 654  |      |
| kz0 |                                  | 1.      |      | kz0  |                                | 1.                            |         | kz0  |      | 1.                                |                            | kz0    |       | 1.   |                          |                         |        |      |      |
| 03  |                                  | 07      |      | 01   |                                | Proant                        | 04      |      | 00   |                                   | 07                         | 00     |       | 00   |                          |                         |        |      |      |
| 37  |                                  | 21      | 0.00 | 34   |                                | hocya                         | 50      | 0.29 | 91   | Robinin(Kaempferol-3-O-gal-       | Flavon                     | 29     | 0.04  | 96   | Afzelechin(3,5,7,4'-     | Flavan                  | 87     | 0.00 |      |
| 0   | Swertiamarin                     | noids   | 4    | 627  | 0 Procyanidin C2               | nidins                        | 0       | 284  | 9    | rham-7-O-rham)                    | ols                        | 3      | 812   | 9    | Tetrahydroxyflavan)      | ols                     | 8      | 666  |      |
| kz0 |                                  | 1.      |      | kz0  |                                | 1.                            |         | kz0  |      | 1.                                |                            | kz0    |       | 1.   |                          |                         |        |      |      |
| 03  |                                  | 07      |      | 00   |                                | 05                            |         | 02   |      | 07                                |                            | 04     |       | 04   | 5,7,3',4',5'-            |                         |        |      |      |
| 80  |                                  | 18      | 0.00 | 79   | Apigenin                       | 7-O-                          | Flavon  | 02   | 0.29 | 91                                |                            | Terpe  | 91    | 0.04 | 66                       | pentahydroxydihydroflav | Flavan | 04   | 0.00 |
| 9   | Sieboldin                        | nes     | 5    | 741  | 1 glucoside(Cosmosiin)         | es                            | 4       | 371  | 2    | Santamarin                        | noids                      | 5      | 907   | 5    | one                      | ones                    | 7      | 722  |      |
| kz0 |                                  | 1.      |      | kz0  |                                | 1.                            |         | kz0  |      | 1.                                |                            | kz0    |       | 1.   |                          |                         |        |      |      |
| 04  |                                  | 07      |      | 02   |                                | 06                            |         | km   |      | 08                                |                            | 02     |       | 02   | Penduletin (5,4'-        |                         |        |      |      |
| 66  | 5,7,3',4',5'-                    | Flavan  | 32   | 0.00 | 97                             | Scutellarin(Scutellarein-7-O- | Flavon  | 62   | 0.29 | 05                                |                            | Flavon | 05    | 0.05 | 96                       | Dihydroxy-3,6,7-        | Flavan | 22   | 0.00 |
| 5   | pentahydroxydihydroflavone       | ones    | 7    | 760  | 6 glucuronide)                 | es                            | 1       | 482  | 48   | Dihydroquercetin (Taxifolin)      | ols                        | 4      | 264   | 2    | trimethoxyflavone)       | es                      | 9      | 746  |      |
| kz0 |                                  | 1.      |      | kz0  |                                | 1.                            |         | kz0  |      | 1.                                |                            | kz0    |       | 1.   |                          |                         |        |      |      |
| 00  |                                  | Pheno   | 06   |      | 01                             |                               | 06      |      | 02   |                                   | Pheno                      | 07     |       | 01   |                          |                         |        |      |      |
| 55  | 4-O-Caffeoyl quinic acid         | lic     | 55   | 0.00 | 11                             |                               | Alkaloi | 35   | 0.30 | 56                                |                            | lic    | 67    | 0.05 | 69                       |                         | Flavon | 20   | 0.00 |
| 2   | (criptochlorogenic acid)         | acids   | 8    | 774  | 3 Lumichrome                   | ds                            | 2       | 343  | 0    | 6-O-feruloyl-α-glucose            | acids                      | 2      | 527   | 5    | wogonoside               | es                      | 9      | 759  |      |
| kz0 |                                  | 1.      |      | kz0  |                                | 1.                            |         | kz0  |      | 1.                                |                            | kz0    |       | 1.   |                          |                         |        |      |      |
| 03  |                                  | Pheno   | 07   |      | 00                             |                               | 06      |      | 03   |                                   | Pheno                      | 08     |       | km   |                          |                         |        |      |      |
| 10  |                                  | lic     | 29   | 0.00 | 29                             |                               | Organi  | 34   | 0.30 | 51                                |                            | lic    | 09    | 0.05 | 04                       | Afzelechin (3,5,7,4'-   | Flavan | 20   | 0.00 |
| 6   | Cuspinin                         | acids   | 1    | 787  | 6 Citramalate                  | c acids                       | 1       | 467  | 9    | Cimidahurinine                    | acids                      | 3      | 670   | 36   | Tetrahydroxyflavan)      | ones                    | 0      | 791  |      |
| kz0 |                                  | 1.      |      | kz0  |                                | 1.                            |         | kz0  |      | 1.                                |                            | kz0    |       | 1.   |                          |                         |        |      |      |
| 02  |                                  | 07      |      | 00   |                                | 06                            |         | 00   |      | Pheno                             | 07                         | 02     |       | 02   |                          |                         |        |      |      |
| 96  |                                  | 37      | 0.00 | 79   |                                | Flavon                        | 97      | 0.30 | 05   |                                   | lic                        | 89     | 0.05  | 97   | Acacetin-7-O-            | Flavon                  | 21     | 0.00 |      |
| 0   | Eupatilin                        | es      | 5    | 806  | 8 Luteolin-7-O-glucuronide     | es                            | 9       | 871  | 8    | Protocatechuic acid O-glucoside   | acids                      | 5      | 954   | 5    | glucuronide              | es                      | 1      | 828  |      |
| kz0 | Caffeoylagmatine                 | Alkaloi | 1.   | 0.00 | kz0                            | Kaempferol-3-O-β-D-           | Flavon  | 1.   | 0.31 | kz0                               | 1,6-Di-O-Galloyl-D-Glucose | Pheno  | 1.    | 0.06 | kz0                      | Quercetin-3-O-(2''-     | Flavon | 1.   | 0.01 |













|     |                                  |         |    |      |     |                                  |                   |         |      |      |                                 |                             |     |      |      |                          |                   |
|-----|----------------------------------|---------|----|------|-----|----------------------------------|-------------------|---------|------|------|---------------------------------|-----------------------------|-----|------|------|--------------------------|-------------------|
| 9   |                                  |         | 4  |      | 7   |                                  |                   | 6       |      | 6    |                                 | 0                           |     | 4    |      | 4                        |                   |
| kz0 |                                  |         | 1. |      | kz0 |                                  |                   | 1.      |      | kz0  |                                 | 1.                          |     | kz0  |      | 1.                       |                   |
| 03  |                                  |         | 06 |      | 00  |                                  | Pheno             | 06      |      | 00   |                                 | Pheno                       | 05  | 02   |      | 09                       |                   |
| 74  |                                  | Terpe   | 06 | 0.24 | 48  |                                  | lic               | 93      | 2.51 | 52   |                                 | lic                         | 60  | 0.23 | 82   | Isorhamnetin-7-O-        |                   |
| 8   | 7'-O-Sinapoyljasminoside L       | noids   | 5  | 629  | 4   | Vanillin                         | acids             | 9       | 658  | 2    | Methyl sinapate                 | acids                       | 4   | 465  | 9    | glucoside                |                   |
| kz0 |                                  |         | 1. |      |     |                                  |                   | 1.      |      | kz0  |                                 | 1.                          |     | kz0  |      | 1.                       |                   |
| 04  |                                  |         | 05 |      | km  |                                  |                   | 03      |      | 00   |                                 | Pheno                       | 06  | 02   |      | 08                       |                   |
| 16  |                                  | Flavon  | 53 | 0.24 | 00  | Genistein                        | (4',5,7-          | Isoflav | 99   | 2.51 | 59                              | β-D-Furanofructosyl-α-D-(6- | lic | 44   | 0.23 | 33                       | Luteolin-7-O-β-D- |
| 9   | Isorhamnetin 3-O-β-D-Glucoside   | ols     | 8  | 942  | 81  | Trihydroxyisoflavone)            | ones              | 6       | 868  | 6    | mustard acyl)glucoside          | acids                       | 2   | 567  | 7    | gentiobioside            |                   |
| kz0 |                                  |         | 1. |      | kz0 |                                  |                   | 1.      |      | kz0  |                                 | 1.                          |     | kz0  |      | 1.                       |                   |
| 05  |                                  |         | 06 |      | 02  |                                  |                   | 04      |      | 00   |                                 | 08                          |     | 04   |      | 02                       |                   |
| 08  | Tricetin?4'-methyl?ether-3'-O-β- | Flavon  | 09 | 0.25 | 93  |                                  | Terpe             | 12      | 2.53 | 90   | Kaempferol-3-O-                 | Flavon                      | 04  | 0.24 | 03   |                          |                   |
| 8   | D-glucoside                      | ols     | 5  | 693  | 3   | Ixerin D                         | noids             | 2       | 411  | 5    | rutinoside(Nicotiflorin)        | ols                         | 1   | 010  | 5    | 3-Indoleacrylic acid     |                   |
| kz0 |                                  |         | 1. |      | kz0 |                                  |                   | 1.      |      | kz0  |                                 | 1.                          |     | kz0  |      | 1.                       |                   |
| 04  |                                  |         | 07 |      | 01  |                                  | Pheno             | 03      |      | 02   |                                 | 07                          |     | 02   |      | 08                       |                   |
| 17  |                                  | Flavon  | 25 | 0.25 | 86  |                                  | lic               | 82      | 2.53 | 97   | Scutellarin(Scutellarein-7-O-   | Flavon                      | 87  | 0.26 | 29   | Syringaresinol-4'-O-β-D- |                   |
| 0   | Rhamnetin 3-O-β-D-Glucoside      | ols     | 2  | 955  | 4   | vnilloylcaffeoyltartaric acid    | acids             | 9       | 707  | 6    | glucuronide)                    | es                          | 3   | 272  | 5    | monO-glucoside           |                   |
| kz0 |                                  |         | 1. |      | kz0 |                                  |                   | 1.      |      | kz0  |                                 | 1.                          |     | kz0  |      | 1.                       |                   |
| 00  |                                  | Pheno   | 06 |      | 03  | Kaempferol                       | 3-O-(6''-trans-p- | 04      |      | 03   |                                 | 06                          |     | 05   |      | 08                       |                   |
| 54  |                                  | lic     | 61 | 0.25 | 81  | Coumaroyl)-β-D-                  | Flavon            | 49      | 2.53 | 81   | Kaempferol-malonyl-3-O-         | Flavon                      | 35  | 0.26 | 20   |                          |                   |
| 8   | Trans-3-O-p-coumaric quinic acid | acids   | 8  | 995  | 5   | glucopyranoside                  | ols               | 9       | 941  | 1    | glucoside                       | ols                         | 1   | 371  | 2    | Dihydrokaempferol        |                   |
| kz0 |                                  |         | 1. |      | kz0 |                                  |                   | 1.      |      | kz0  |                                 | 1.                          |     | kz0  |      | 1.                       |                   |
| 02  |                                  |         | 07 |      | 01  |                                  |                   | 06      |      | 05   |                                 | Pheno                       | 07  |      | 03   |                          |                   |
| 85  |                                  | Alkaloi | 30 | 0.26 | 08  |                                  | Terpe             | 81      | 2.54 | 18   |                                 | lic                         | 38  | 0.26 | 51   | 5-(2-Hydroxyethyl)-2-O-  |                   |
| 3   | Dihydroisopelletierine           | ds      | 8  | 160  | 9   | 2-Hydroxyoleanolic acid          | noids             | 8       | 107  | 6    | Dunalianoside C                 | acids                       | 3   | 398  | 8    | glucosylohenol           |                   |
| kz0 |                                  |         | 1. |      | kz0 |                                  |                   | 1.      |      | kz0  |                                 | 1.                          |     | kz0  |      | 1.                       |                   |
| 00  |                                  | Pheno   | 06 |      | 00  |                                  |                   | 05      |      | 02   |                                 | 05                          |     | 02   |      | 08                       |                   |
| 56  |                                  | lic     | 83 | 0.26 | 24  |                                  | Alkaloi           | 98      | 2.54 | 48   | 1,4,8-trihydroxy naphthalene-1- | Quino                       | 77  | 0.26 | 99   | Quercetin-7-O-(6'-O-     |                   |
| 0   | Trihydroxycinnamoylquinic acid   | acids   | 5  | 399  | 0   | Trans-Zeatin-9-N-Glucoside       | ds                | 5       | 890  | 6    | O-β-D-glucopyranoside           | nes                         | 6   | 486  | 5    | malonyl)-β-D-glucoside   |                   |
| kz0 |                                  |         | 1. |      | kz0 |                                  |                   | 1.      |      | kz0  |                                 | 1.                          |     | kz0  |      | 1.                       |                   |
| 02  |                                  |         | 07 |      | 04  |                                  |                   | 06      |      | 02   |                                 | 06                          |     | 03   |      | Pheno                    |                   |
| 82  |                                  | Flavon  | 00 | 0.26 | 62  |                                  | Terpe             | 90      | 2.55 | 99   |                                 | Flavon                      | 82  | 0.26 | 71   |                          |                   |
| 9   | Isorhamnetin-7-O-glucoside       | ols     | 8  | 873  | 7   | alphitolic acid                  | noids             | 2       | 738  | 0    | Luteolin-7-O-rutinoside         | es                          | 6   | 574  | 4    | 6-O-Galloyl-β-D-glucose  |                   |
| kz0 |                                  |         | 1. |      | kz0 |                                  |                   | 1.      |      | kz0  |                                 | 1.                          |     | kz0  |      | 1.                       |                   |
| 04  |                                  |         | 05 |      | 01  |                                  |                   | 05      |      | 01   |                                 | 07                          |     | 03   |      | Pheno                    |                   |
| 73  | 4,7,9,9'-Tetrahydroxy-3,3'-      | Other   | 02 | 0.27 | 29  |                                  | Organi            | 23      | 2.56 | 70   | Kaempferol-3-O-β-D-             | Flavon                      | 87  | 0.27 | 49   |                          |                   |
| 8   | dimethoxy-8-O-4'-neolignan       | s       | 6  | 100  | 7   | (Rs)-Mevalonic acid              | c acids           | 6       | 548  | 2    | glucuronide                     | ols                         | 7   | 004  | 7    | 3-O-Galloyl-β-D-glucose  |                   |
| kz0 |                                  |         | 1. |      | kz0 |                                  |                   | 1.      |      | kz0  |                                 | 1.                          |     | kz0  |      | 1.                       |                   |
| 00  |                                  |         | 06 |      | 01  |                                  |                   | 06      |      | 00   |                                 | 08                          |     | 03   |      | Pheno                    |                   |
| 14  |                                  | Flavon  | 37 | 0.27 | 08  | 3,24-Dihydroxy-17,21-            | Terpe             | 83      | 2.58 | 79   |                                 | Flavon                      | 06  | 0.27 | 10   |                          |                   |
| 7   | Methylquercetin O-hexoside       | ols     | 4  | 129  | 8   | semiacetal-12(13)oleanolic fruit | noids             | 6       | 065  | 8    | Luteolin-7-O-glucuronide        | es                          | 8   | 298  | 0    | 5-O-Galloylhamamelose    |                   |
| kz0 | 6-methoxykaempferol-3-O-         | Flavon  | 1. | 0.27 | kz0 | 2-Methylsuccinic acid            | Organi            | 1.      | 2.59 | kz0  | Tetahydroxy-flavone-7-O-β-D-    | Flavon                      | 1.  | 0.27 | kz0  | Parthenolide             |                   |

|     |                                 |               |        |      |      |                               |         |    |      |     |                                     |         |    |      |     |                                 |         |    |      |
|-----|---------------------------------|---------------|--------|------|------|-------------------------------|---------|----|------|-----|-------------------------------------|---------|----|------|-----|---------------------------------|---------|----|------|
| 02  | glucoside                       | ols           | 06     | 726  | 01   |                               | c acids | 06 | 091  | 00  | glucuronide                         | es      | 08 | 448  | 02  |                                 | noids   | 08 | 970  |
| 98  |                                 |               | 53     |      | 28   |                               |         | 35 |      | 79  |                                     |         | 05 |      | 91  |                                 |         | 87 |      |
| 2   |                                 |               | 8      |      | 5    |                               |         | 7  |      | 7   |                                     |         | 3  |      | 0   |                                 |         | 7  |      |
| kz0 |                                 |               | 1.     |      | kz0  |                               |         | 1. |      | kz0 |                                     |         | 1. |      | kz0 |                                 |         | 1. |      |
| 02  |                                 |               | 03     |      | 03   |                               |         | 07 |      | 00  |                                     |         | 05 |      | 04  |                                 |         | 08 |      |
| 97  |                                 | Flavon        | 56     | 0.27 | 54   |                               | Other   | 07 | 2.59 | 90  | Kaempferol-3-O-glucoside-7-O-       | Flavon  | 98 | 0.27 | 23  |                                 | Terpe   | 73 | 0.11 |
| 7   | Diosmetin-7-O-galactoside       | es            | 3      | 967  | 9    | Hederagenin                   | s       | 3  | 662  | 7   | rhamnoside                          | ols     | 2  | 753  | 1   | Isothankunic acid               | noids   | 8  | 855  |
| kz0 |                                 |               | 1.     |      | kz0  |                               |         | 1. |      | kz0 |                                     |         | 1. |      | kz0 |                                 |         | 1. |      |
| 00  |                                 |               | 07     |      | 00   |                               |         | 06 |      | 04  |                                     |         | 06 |      | 03  |                                 | Pheno   | 08 |      |
| 23  |                                 | Alkaloi       | 20     | 0.28 | 77   |                               | Flavon  | 74 | 2.63 | 73  | 4,7,9,9'-Tetrahydroxy-3,3'-         | Other   | 28 | 0.27 | 72  |                                 | lic     | 69 | 0.11 |
| 2   | O-Phosphocholine                | ds            | 8      | 465  | 9    | Diosmetin                     | es      | 7  | 377  | 8   | dimethoxy-8-O-4'-neolignan          | s       | 2  | 816  | 0   | Maplexin H                      | acids   | 4  | 930  |
| kz0 |                                 |               | 1.     |      | kz0  |                               |         | 1. |      | kz0 |                                     |         | 1. |      | kz0 |                                 |         | 1. |      |
| 05  |                                 |               | 00     |      | 02   |                               |         | 05 |      | 00  | Catechin-(7,8-bc)-4 $\alpha$ -(3,4- |         | 06 |      | 01  |                                 |         | 09 |      |
| 37  |                                 | Lignan        | 56     | 0.28 | 97   |                               | Flavon  | 95 | 2.63 | 97  | dihydroxyphenyl)-dihydro-2-         | Flavan  | 86 | 0.28 | 29  |                                 | Organi  | 14 | 0.11 |
| 3   | Lyoniresinol                    | s             | 5      | 521  | 7    | Diosmetin-7-O-galactoside     | es      | 2  | 654  | 9   | (3H)-pyranone                       | ols     | 6  | 858  | 8   | L-(+)-Tartaric acid             | c acids | 4  | 931  |
|     |                                 |               | 1.     |      |      |                               |         | 1. |      | kz0 |                                     |         | 1. |      | kz0 |                                 |         | 1. |      |
| km  |                                 |               | 06     |      | km   |                               |         | 04 |      | 00  |                                     |         | 08 |      | 02  |                                 |         | 07 |      |
| 13  |                                 | Flavon        | 64     | 0.29 | 12   |                               | Flavon  | 42 | 2.64 | 29  |                                     | Organi  | 02 | 0.29 | 94  |                                 | Flavon  | 97 | 0.12 |
| 07  | Isorhamnetin 5-O-hexoside       | ols           | 8      | 444  | 11   | Chrysoeriol 7-O-hexoside      | es      | 1  | 192  | 1   | 2-Picolinic acid                    | c acids | 3  | 034  | 9   | Hispidulin                      | es      | 5  | 037  |
| kz0 |                                 |               | 1.     |      | kz0  |                               |         | 1. |      | kz0 |                                     |         | 1. |      | kz0 |                                 |         | 1. |      |
| 05  |                                 |               | 07     |      | 01   |                               |         | 06 |      | 00  |                                     |         | 07 |      | 00  |                                 |         | 09 |      |
| 05  |                                 | Flavon        | 00     | 0.29 | 15   |                               | Vitami  | 04 | 2.65 | 99  |                                     | Lignan  | 90 | 0.30 | 88  |                                 | Flavon  | 03 | 0.12 |
| 4   | Chrysin-7-glucoside             | es            | 9      | 513  | 7    | 4-Pyridoxic acid              | ns      | 2  | 940  | 5   | Syringaresinol                      | s       | 5  | 456  | 1   | Avicularin                      | ols     | 9  | 135  |
| kz0 |                                 |               | 1.     |      | kz0  |                               |         | 1. |      | kz0 |                                     |         | 1. |      | kz0 |                                 |         | 1. |      |
| 00  |                                 | Pheno         | 03     |      | 00   |                               |         | 06 |      | 00  |                                     |         | 07 |      | 00  |                                 |         | 09 |      |
| 52  |                                 | lic           | 10     | 0.29 | 81   |                               | Flavon  | 89 | 2.70 | 90  |                                     | Flavon  | 71 | 0.30 | 24  | Trans-Zeatin-9-N-               | Alkaloi | 05 | 0.12 |
| 2   | Methyl sinapate                 | acids         | 5      | 616  | 2    | Tricin O-saccharic acid       | es      | 3  | 166  | 9   | Quercetin-3-O-rutinoside (Rutin)    | ols     | 3  | 930  | 0   | Glucoside                       | ds      | 5  | 318  |
| kz0 |                                 |               | 1.     |      | kz0  |                               |         | 1. |      | kz0 |                                     |         | 1. |      | kz0 |                                 |         | 1. |      |
| 03  |                                 |               | 05     |      | 00   |                               |         | 04 |      | 00  |                                     |         | 08 |      | 01  |                                 | Pheno   | 08 |      |
| 10  |                                 | Flavon        | 77     | 0.29 | 27   |                               | Alkaloi | 24 | 2.76 | 24  |                                     | Alkaloi | 00 | 0.31 | 88  | feruloylsinapoyltartaric        | lic     | 43 | 0.12 |
| 9   | Mearnsitrin                     | es            | 1      | 632  | 8    | Indole 3-acetic acid (IAA)    | ds      | 7  | 863  | 0   | Trans-Zeatin-9-N-Glucoside          | ds      | 1  | 399  | 0   | acid                            | acids   | 7  | 480  |
| kz0 |                                 |               | 1.     |      | kz0  |                               |         | 1. |      | kz0 |                                     |         | 1. |      | kz0 |                                 |         | 1. |      |
| 02  |                                 |               | 06     |      | 00   |                               |         | 05 |      | 00  | Catechin-(7,8-bc)-4 $\beta$ -(3,4-  |         | 07 |      | 02  |                                 | Pheno   | 08 |      |
| 48  | 1,4,8-trihydroxy naphthalene-1- | Quino         | 03     | 0.29 | 30   |                               | Organi  | 96 | 2.78 | 97  | dihydroxyphenyl)-dihydro-2-         | Flavan  | 88 | 0.31 | 56  |                                 | lic     | 24 | 0.12 |
| 6   | O- $\beta$ -D-glucopyranoside   | nes           | 8      | 763  | 0    | DL-Glyceraldehyde 3-phosphate | c acids | 7  | 026  | 8   | (3H)-pyranone                       | ols     | 2  | 877  | 0   | 6-O-feruloyl- $\alpha$ -glucose | acids   | 3  | 725  |
| kz0 |                                 |               | 1.     |      | kz0  |                               |         | 1. |      | kz0 |                                     |         | 1. |      | kz0 |                                 |         | 1. |      |
| 03  |                                 |               | 05     |      | 04   |                               |         | 05 |      | 00  |                                     |         | 07 |      | 03  |                                 |         | 01 |      |
| 11  |                                 | Organi        | 53     | 0.30 | 02   |                               | Alkaloi | 72 | 2.79 | 28  |                                     | Organi  | 25 | 0.32 | 15  |                                 | Alkaloi | 02 | 0.13 |
| 6   | 2,4,6-trihydroxy benzoic acid   | c acids       | 8      | 000  | 1    | 6-Deoxyfagomine               | ds      | 9  | 555  | 4   | 3-Hydroxypropanoic acid             | c acids | 2  | 536  | 8   | Ailanindole                     | ds      | 5  | 540  |
| kz0 |                                 |               | 1.     |      | kz0  |                               |         | 1. |      | kz0 |                                     |         | 1. |      | kz0 |                                 |         | 1. |      |
| 00  | Naringenin                      | 7-O-glucoside | Flavan | 07   | 0.30 | 01                            |         | 06 | 2.81 | 00  |                                     | Flavan  | 03 | 0.32 | 05  |                                 | Flavon  | 09 | 0.13 |
| 15  | (Prunin)                        | ols           | 21     | 281  | 26   | 2-Furanoic acid               | c acids | 74 | 628  | 44  | Astilbin                            | ols     | 46 | 634  | 05  | Chrysin-7-glucoside             | es      | 13 | 856  |

|     |                                  |            |    |      |     |                                |         |    |      |     |                                |                |     |      |     |
|-----|----------------------------------|------------|----|------|-----|--------------------------------|---------|----|------|-----|--------------------------------|----------------|-----|------|-----|
| 9   |                                  |            | 5  |      | 8   |                                | 4       |    | 0    |     | 6                              |                | 4   |      | 6   |
| kz0 |                                  |            | 1. |      | kz0 |                                | 1.      |    | kz0  |     | 1.                             |                | kz0 |      | 1.  |
| 00  |                                  |            | 06 |      | 01  |                                | 06      |    | 00   |     | 04                             |                | 05  |      | 08  |
| 79  |                                  | Flavon     | 84 | 0.30 | 28  |                                | Organi  | 18 | 2.83 | 43  |                                | Flavan         | 21  | 0.33 | 38  |
| 2   | Apigenin 5-O-glucoside           | es         | 8  | 979  | 1   | Citraconic acid                | c acids | 4  | 352  | 1   | Eriodictyol 7-O-glucoside      | ones           | 9   | 034  | 9   |
| kz0 |                                  |            | 1. |      | kz0 |                                |         | 1. |      | kz0 |                                |                | 1.  |      | kz0 |
| 00  |                                  | Pheno      | 06 |      | 02  |                                |         | 06 |      | 04  |                                |                | 06  |      | 00  |
| 06  |                                  | lic        | 21 | 0.31 | 85  |                                | Alkaloi | 58 | 2.84 | 17  | Quercetin                      | 3-O-β-D-Flavon | 95  | 0.33 | 52  |
| 4   | 1-O-Feruloyl quinic acid         | acids      | 3  | 440  | 3   | Dihydroisopelletierine         | ds      | 6  | 347  | 3   | neohesperidoside               | ols            | 0   | 115  | 2   |
| kz0 |                                  |            | 1. |      |     |                                |         | 1. |      | kz0 |                                |                | 1.  |      |     |
| 03  |                                  |            | 06 |      | km  |                                |         | 05 |      | 00  |                                | Pheno          | 07  |      | km  |
| 76  |                                  | Terpe      | 91 | 0.31 | 02  |                                | Flavon  | 76 | 2.85 | 56  |                                | lic            | 57  | 0.33 | 02  |
| 6   | Uncargenin D                     | noids      | 4  | 523  | 35  | Apigenin                       | es      | 7  | 484  | 0   | Trihydroxycinnamoylquinic acid | acids          | 0   | 157  | 39  |
| kz0 |                                  |            | 1. |      | kz0 |                                |         | 1. |      | kz0 |                                |                | 1.  |      | kz0 |
| 02  |                                  |            | 03 |      | 00  |                                |         | 06 |      | 01  |                                |                | 07  |      | 02  |
| 78  | Sexangularetin 3-glucoside-7-    | Flavon     | 94 | 0.31 | 90  |                                | Flavon  | 96 | 2.89 | 16  |                                | Vitami         | 37  | 0.33 | 21  |
| 8   | rhamnoside                       | ols        | 0  | 557  | 4   | Tiliroside                     | ols     | 0  | 256  | 3   | Riboflavin                     | ns             | 5   | 409  | 1   |
| kz0 |                                  |            | 1. |      | kz0 |                                |         | 1. |      | kz0 |                                |                | 1.  |      | kz0 |
| 05  |                                  |            | 05 |      | 01  |                                |         | 04 |      | 01  |                                |                | 07  |      | 01  |
| 04  |                                  | Coum       | 73 | 0.32 | 17  |                                | Coum    | 58 | 2.93 | 31  |                                | Organi         | 55  | 0.34 | 15  |
| 3   | Scopoletin?Beta-D-Glucuronide    | arins      | 2  | 067  | 5   | Esculetin                      | arins   | 3  | 033  | 2   | Shikimic acid                  | c acids        | 6   | 859  | 8   |
| kz0 |                                  |            | 1. |      | kz0 |                                |         | 1. |      | kz0 |                                |                | 1.  |      | kz0 |
| 01  |                                  |            | 06 |      | 05  |                                |         | 07 |      | 00  |                                |                | 07  |      | 00  |
| 17  |                                  | Coum       | 79 | 0.32 | 19  | Poncirin(Isosakuranetin-7-     | Flavan  | 02 | 2.93 | 90  |                                | Flavon         | 62  | 0.34 | 61  |
| 7   | Scoparone                        | arins      | 6  | 115  | 8   | neohesperidoside)              | ones    | 2  | 444  | 8   | Quercetin-3-O-robinobioside    | ols            | 7   | 891  | 3   |
| kz0 |                                  |            | 1. |      | kz0 |                                |         | 1. |      | kz0 |                                |                | 1.  |      | kz0 |
| 00  |                                  |            | 04 |      | 01  |                                |         | 06 |      | 03  |                                |                | 01  |      | 02  |
| 79  | Apigenin                         | 7-O-Flavon | 09 | 0.33 | 10  |                                | Alkaloi | 82 | 3.00 | 85  |                                | Terpe          | 13  | 0.35 | 97  |
| 1   | glucoside(Cosmosiin)             | es         | 1  | 885  | 5   | Acetylcholine                  | ds      | 8  | 000  | 9   | p-Coumaroyleuscaphic acid      | noids          | 0   | 369  | 7   |
| kz0 |                                  |            | 1. |      | kz0 |                                |         | 1. |      | kz0 |                                |                | 1.  |      | kz0 |
| 02  |                                  |            | 04 |      | 01  |                                |         | 06 |      | 00  |                                |                | 07  |      | 00  |
| 60  |                                  | Other      | 80 | 0.34 | 29  |                                | Organi  | 95 | 3.00 | 91  |                                | Flavon         | 52  | 0.35 | 15  |
| 7   | Lariciresinol glucopyranoside    | s          | 2  | 364  | 3   | 4-Guanidinobutyric acid        | c acids | 8  | 146  | 1   | Quercetin-7-O-rutinoside       | ols            | 3   | 455  | 9   |
| kz0 |                                  |            | 1. |      | kz0 |                                |         | 1. |      | kz0 |                                |                | 1.  |      | kz0 |
| 00  |                                  |            | 06 |      | 05  |                                |         | 06 |      | 03  |                                |                | 04  |      | 00  |
| 99  |                                  | Lignan     | 60 | 0.35 | 13  |                                | Flavon  | 98 | 3.00 | 84  |                                | Flavan         | 99  | 0.35 | 12  |
| 7   | Terpineol monO-glucoside         | s          | 4  | 384  | 2   | Luteolin-caffeoyl-O-rhamnoside | es      | 7  | 983  | 8   | Cinchonain lc                  | ols            | 5   | 826  | 1   |
| kz0 |                                  |            | 1. |      |     |                                |         | 1. |      | kz0 |                                |                | 1.  |      | kz0 |
| 00  |                                  |            | 06 |      | km  |                                |         | 02 |      | 02  |                                |                | 06  |      | 01  |
| 28  |                                  | Organi     | 12 | 0.36 | 00  | Orobol (5,7,3',4'-             | Isoflav | 25 | 3.11 | 67  |                                | Flavon         | 82  | 0.36 | 10  |
| 4   | 3-Hydroxypropanoic acid          | c acids    | 2  | 151  | 98  | tetrahydroxyisoflavone)        | ones    | 9  | 535  | 3   | Eriodictyol-O-glucoside        | es             | 9   | 091  | 0   |
| kz0 | Chrysin 5-O-glucoside (Toringin) | Flavon     | 1. | 0.36 | kz0 | 2,5-Dihydroxy benzoic acid O-  | Pheno   | 1. | 3.12 | kz0 | Dihydrosedinine                | Alkaloi        | 1.  | 0.36 | kz0 |

|     |                                 |         |    |      |     |                                  |         |    |      |     |                              |         |    |      |     |                         |         |    |      |
|-----|---------------------------------|---------|----|------|-----|----------------------------------|---------|----|------|-----|------------------------------|---------|----|------|-----|-------------------------|---------|----|------|
| 00  |                                 | es      | 06 | 543  | 00  | hexside                          | lic     | 04 | 918  | 02  |                              | ds      | 07 | 305  | 01  |                         | c acids | 08 | 016  |
| 12  |                                 |         | 88 |      | 53  |                                  | acids   | 74 |      | 86  |                              |         | 14 |      | 29  |                         |         | 80 |      |
| 1   |                                 |         | 2  |      | 3   |                                  |         | 2  |      | 2   |                              |         | 2  |      | 2   |                         |         | 8  |      |
| kz0 |                                 |         | 1. |      |     |                                  |         | 1. |      | kz0 |                              |         | 1. |      | kz0 |                         |         | 1. |      |
| 05  |                                 |         | 03 |      | km  |                                  |         | 00 |      | 05  |                              |         | 05 |      | 03  |                         | Pheno   | 08 |      |
| 05  |                                 | Flavon  | 73 | 0.36 | 02  |                                  | Isoflav | 85 | 3.15 | 13  | Isoscooletin (6-Hydroxy-7-   | Coum    | 68 | 0.37 | 71  | 2,3-Di-O-Galloyl-D-     | lic     | 73 | 0.16 |
| 5   | Galangin-7-glucoside            | es      | 3  | 604  | 31  | 2'-Hydroxygenistein              | ones    | 4  | 574  | 7   | Methoxycoumarin)             | arins   | 5  | 559  | 8   | Glucose                 | acids   | 1  | 249  |
| kz0 |                                 |         | 1. |      | kz0 |                                  |         | 1. |      | kz0 |                              |         | 1. |      | kz0 |                         |         | 1. |      |
| 03  |                                 | Pheno   | 04 |      | 02  |                                  |         | 06 |      | 03  |                              |         | 07 |      | 05  | Isoscooletin (6-        |         | 08 |      |
| 72  |                                 | lic     | 17 | 0.37 | 78  | Kaempferol 3-O-β-d-(6''-O-(E)-p- | Flavon  | 86 | 3.16 | 54  | Dihydrokaempferol-7-O-       | Flavon  | 08 | 0.38 | 13  | Hydroxy-7-              | Coum    | 72 | 0.16 |
| 0   | Maplexin H                      | acids   | 8  | 225  | 3   | coumaroyl) glucopyranoside       | ols     | 5  | 172  | 0   | glucoside                    | ols     | 0  | 578  | 7   | Methoxycoumarin)        | arins   | 8  | 562  |
| kz0 |                                 |         | 1. |      | kz0 |                                  |         | 1. |      | kz0 |                              |         | 1. |      | kz0 |                         |         | 1. |      |
| 04  |                                 |         | 07 |      | 03  |                                  | Pheno   | 05 |      | 00  |                              | Pheno   | 02 |      | 03  | Kaempferol 3-O-(6''-    |         | 07 |      |
| 63  |                                 | Terpe   | 32 | 0.37 | 63  |                                  | lic     | 91 | 3.21 | 50  |                              | lic     | 07 | 0.39 | 81  | trans-p-Coumaroyl)-β-D- | Flavon  | 50 | 0.16 |
| 2   | isoceanothic acid               | noids   | 8  | 273  | 6   | Plantainoside A                  | acids   | 5  | 386  | 5   | Coniferyl alcohol            | acids   | 2  | 691  | 5   | glucopyranoside         | ols     | 6  | 580  |
| kz0 |                                 |         | 1. |      | kz0 |                                  |         | 1. |      | kz0 |                              |         | 1. |      | kz0 |                         |         | 1. |      |
| 00  |                                 | Pheno   | 01 |      | 04  |                                  |         | 06 |      | 02  |                              |         | 00 |      | 00  |                         |         | 08 |      |
| 06  |                                 | lic     | 30 | 0.38 | 01  | Cis-p-coumaric acid 4-O-         | Other   | 48 | 3.23 | 97  |                              | Flavon  | 55 | 0.40 | 77  |                         | Flavon  | 61 | 0.16 |
| 8   | Catechin gallate                | acids   | 0  | 255  | 5   | glucoside                        | s       | 4  | 737  | 7   | Diosmetin-7-O-galactoside    | es      | 7  | 275  | 9   | Diosmetin               | es      | 5  | 627  |
|     |                                 |         | 1. |      |     |                                  |         | 1. |      | kz0 |                              |         | 1. |      | kz0 |                         |         | 1. |      |
| km  |                                 |         | 05 |      | km  |                                  |         | 06 |      | 05  |                              | Pheno   | 05 |      | 00  |                         | Pheno   | 08 |      |
| 00  |                                 | Isoflav | 32 | 0.38 | 02  |                                  | Flavon  | 84 | 3.25 | 18  |                              | lic     | 68 | 0.41 | 55  |                         | lic     | 70 | 0.17 |
| 80  | Biochanin A                     | ones    | 3  | 344  | 39  | Chrysoeriol                      | es      | 6  | 105  | 7   | Dunalianoside B              | acids   | 1  | 407  | 7   | Glucosyringic Acid      | acids   | 2  | 077  |
| kz0 |                                 |         | 1. |      | kz0 |                                  |         | 1. |      | kz0 |                              |         | 1. |      | kz0 |                         |         | 1. |      |
| 02  |                                 |         | 00 |      | 05  |                                  |         | 05 |      | 03  | Kaempferol 3-O-(6''-trans-p- |         | 01 |      | 00  | β-D-Furanofructosyl-α-  | Pheno   | 08 |      |
| 19  | 2'-Hydoxy,5-methoxy Genistein-  | Isoflav | 83 | 0.39 | 08  | (Kaempferol-3-O-β-D-             | Flavon  | 23 | 3.25 | 81  | Coumaroyl)-β-D-              | Flavon  | 94 | 0.42 | 59  | D-(6-mustard            | lic     | 67 | 0.17 |
| 6   | O-rhamnosyl-glucoside           | ones    | 9  | 110  | 4   | galactoside-4'O-β-D-glucoside)   | ols     | 4  | 372  | 5   | glucopyranoside              | ols     | 2  | 104  | 6   | acyl)glucoside          | acids   | 3  | 089  |
| kz0 |                                 |         | 1. |      | kz0 |                                  |         | 1. |      | kz0 |                              |         | 1. |      | kz0 |                         |         | 1. |      |
| 00  |                                 | Pheno   | 07 |      | 02  |                                  | Pheno   | 06 |      | 01  |                              |         | 05 |      | 01  |                         |         | 08 |      |
| 05  |                                 | lic     | 22 | 0.39 | 54  |                                  | lic     | 86 | 3.27 | 67  | 5,7,2'-Trhiyrox-8-           | Flavon  | 25 | 0.42 | 67  | 5,7,2'-Trhiyrox-8-      | Flavon  | 75 | 0.17 |
| 6   | Salicylic acid glucoside        | acids   | 0  | 242  | 8   | p-Coumaric acid-O-glycoside      | acids   | 7  | 444  | 1   | methoxyflavone               | es      | 1  | 301  | 1   | methoxyflavone          | es      | 6  | 141  |
| kz0 |                                 |         | 1. |      | kz0 |                                  |         | 1. |      | kz0 |                              |         | 1. |      | kz0 |                         |         | 1. |      |
| 00  |                                 |         | 05 |      | 05  |                                  |         | 07 |      | 00  |                              |         | 05 |      | 03  |                         |         | 08 |      |
| 91  | Isorhamnetin-3-O-rutinoside     | Flavon  | 96 | 0.39 | 37  |                                  | Lignan  | 07 | 3.29 | 77  |                              | Flavon  | 23 | 0.43 | 76  |                         | Terpe   | 93 | 0.17 |
| 2   | (Narcissin)                     | ols     | 0  | 989  | 5   | Isolariciresinol 9'-O-Glucoside  | s       | 2  | 126  | 9   | Diosmetin                    | es      | 6  | 792  | 6   | Uncargenin D            | noids   | 8  | 940  |
| kz0 |                                 |         | 1. |      | kz0 |                                  |         | 1. |      | kz0 |                              |         | 1. |      | kz0 |                         |         | 1. |      |
| 01  |                                 |         | 03 |      | 03  | dihydrodehydrodiconiferyl        |         | 06 |      | 02  |                              |         | 07 |      | 04  |                         |         | 07 |      |
| 19  |                                 | Isoflav | 89 | 0.40 | 84  | alcohol 4-O-β-D-                 | Lignan  | 74 | 3.32 | 41  |                              | Alkaloi | 80 | 0.44 | 73  |                         | Other   | 10 | 0.18 |
| 3   | Prunetin                        | ones    | 6  | 117  | 9   | glucopyranosides                 | s       | 9  | 254  | 9   | Ergotamine                   | ds      | 4  | 473  | 5   | Ligraminol E            | s       | 3  | 244  |
| kz0 |                                 |         | 1. |      | kz0 |                                  |         | 1. |      | kz0 |                              | Pheno   | 1. |      | km  |                         |         | 1. |      |
| 02  | Quercetin-7-O-(6'-O-malonyl)-β- | Flavon  | 02 | 0.40 | 01  |                                  | Organi  | 06 | 3.33 | 00  |                              | lic     | 07 | 0.45 | 12  | Chrysoeriol 7-O-        | Flavon  | 05 | 0.18 |
| 99  | D-glucoside                     | ols     | 31 | 496  | 27  | L-Homoserine                     | c acids | 57 | 586  | 57  | Hexahydroxydiphenoylglucose  | acids   | 70 | 837  | 11  | hexoside                | es      | 69 | 499  |

|     |                                  |         |    |      |                              |                              |         |    |      |     |                                  |         |      |      |     |                           |         |    |      |
|-----|----------------------------------|---------|----|------|------------------------------|------------------------------|---------|----|------|-----|----------------------------------|---------|------|------|-----|---------------------------|---------|----|------|
| 5   |                                  |         | 9  | 9    |                              |                              | 8       | 7  |      | 4   |                                  | 3       |      |      |     |                           |         |    |      |
| kz0 |                                  |         | 1. | kz0  | 2-Hydroxy-5,8,11,14,17-      |                              | 1.      |    |      | 1.  | kz0                              | 1.      |      |      |     |                           |         |    |      |
| 03  |                                  | Pheno   | 06 | 04   | icosapentaenoyloxy]propyl-2- |                              | 07      | km |      | 02  | 02                               | Pheno   | 09   |      |     |                           |         |    |      |
| 71  |                                  | lic     | 88 | 0.41 | 76                           | (trimethylammonio)ethyl      | Alkaloi | 07 | 3.36 | 02  | Flavon                           | 68      | 0.48 | 54   | lic | 08                        | 0.18    |    |      |
| 4   | 6-O-Galloyl-β-D-glucose          | acids   | 8  | 493  | 2                            | phosphate                    | ds      | 6  | 971  | 39  | Chrysoeriol                      | es      | 7    | 043  | 9   | Vanillic acid glycoside   | acids   | 0  | 635  |
| kz0 |                                  |         | 1. | kz0  |                              |                              |         | 1. |      | kz0 |                                  |         | 1.   |      | kz0 |                           |         | 1. |      |
| 03  |                                  | Pheno   | 07 |      | 03                           |                              |         | 06 |      | 05  |                                  | Pheno   | 07   |      | 01  |                           |         | 09 |      |
| 49  |                                  | lic     | 31 | 0.42 | 86                           | 3-O-Trans-feruloyl euscaphic | Terpe   | 07 | 3.39 | 35  |                                  | lic     | 96   | 0.49 | 04  | N-Acetyl-D-glucosamine    | Other   | 19 | 0.19 |
| 7   | 3-O-Galloyl-β-D-glucose          | acids   | 6  | 022  | 1                            | acid                         | noids   | 5  | 804  | 5   | Koaburaside                      | acids   | 5    | 615  | 1   | 1-phosphate               | s       | 9  | 004  |
| kz0 |                                  |         | 1. | kz0  |                              |                              |         | 1. |      | kz0 |                                  |         | 1.   |      | kz0 |                           |         | 1. |      |
| 00  |                                  | Pheno   | 04 |      | 03                           |                              |         | 06 |      | 02  |                                  |         | 00   |      | 00  |                           | Pheno   | 09 |      |
| 07  | Anthranilate O-hexosyl-O-        | lic     | 70 | 0.42 | 57                           |                              | Flavon  | 88 | 3.40 | 80  |                                  | Organi  | 98   | 2.06 | 05  |                           | lic     | 08 | 0.19 |
| 0   | hexoside                         | acids   | 7  | 906  | 2                            | Biondnoid I                  | ols     | 1  | 340  | 7   | Dimethylmalonic acid             | c acids | 6    | 844  | 6   | Salicylic acid glucoside  | acids   | 9  | 816  |
| kz0 |                                  |         | 1. | kz0  |                              |                              |         | 1. |      | kz0 |                                  |         | 1.   |      | kz0 |                           |         | 1. |      |
| 03  |                                  | Pheno   | 07 |      | 00                           |                              |         | 06 |      | 01  |                                  |         | 05   |      | 00  |                           |         | 08 |      |
| 10  |                                  | lic     | 28 | 0.43 | 91                           | 6-Hydroxykaempferol-7,6-O-   | Flavon  | 77 | 3.41 | 29  |                                  | Organi  | 10   | 2.08 | 19  |                           | Other   | 31 | 0.20 |
| 0   | 5-O-Galloylhamamelose            | acids   | 6  | 245  | 5                            | Diglucoside                  | ols     | 5  | 739  | 2   | 4-Acetamidobutyric acid          | c acids | 7    | 901  | 0   | Arbutin                   | s       | 3  | 892  |
|     |                                  |         | 1. | kz0  |                              |                              |         | 1. |      | kz0 |                                  |         | 1.   |      | kz0 |                           |         | 1. |      |
| km  |                                  |         | 04 | 01   |                              |                              |         | 04 |      | 03  |                                  | Pheno   | 02   |      | 01  |                           |         | 08 |      |
| 05  |                                  | Flavon  | 55 | 0.44 | 03                           |                              | Other   | 98 | 3.47 | 72  |                                  | lic     | 25   | 2.20 | 08  |                           | Terpe   | 71 | 0.21 |
| 48  | Dihydroquercetin (Taxifolin)     | ols     | 3  | 054  | 2                            | N-Acetyl-D-galactosamine     | s       | 3  | 216  | 1   | Maplexin G                       | acids   | 8    | 535  | 4   | Ursolic acid              | noids   | 1  | 260  |
| kz0 |                                  |         | 1. | kz0  |                              |                              |         | 1. |      | kz0 |                                  |         | 1.   |      | kz0 |                           |         | 1. |      |
| 01  |                                  |         | 07 | 05   |                              |                              |         | 05 |      | 01  |                                  |         | 05   |      | 02  | 1,4,8-trihydroxy          |         | 08 |      |
| 04  | N-Acetyl-D-glucosamine 1-        | Other   | 13 | 0.44 | 38                           |                              | Other   | 10 | 3.48 | 31  |                                  | Organi  | 39   | 2.24 | 48  | naphthalene-1-O-β-D-      | Quino   | 29 | 0.21 |
| 1   | phosphate                        | s       | 5  | 141  | 9                            | Byzantionoside A             | s       | 0  | 073  | 5   | Anchoic Acid                     | c acids | 2    | 652  | 6   | glucopyranoside           | nes     | 3  | 612  |
| kz0 |                                  |         | 1. | kz0  |                              |                              |         | 1. |      | kz0 |                                  |         | 1.   |      | kz0 |                           |         | 1. |      |
| 01  |                                  |         | 05 | 00   |                              |                              |         | 07 |      | 00  |                                  | Antho   | 00   |      | 00  |                           | Pheno   | 08 |      |
| 28  |                                  | Organi  | 35 | 0.44 | 42                           |                              | Flavan  | 01 | 3.51 | 69  |                                  | cyanin  | 69   | 2.28 | 50  |                           | lic     | 88 | 0.21 |
| 7   | (S)-(-)-2-Hydroxyisocaproic acid | c acids | 7  | 665  | 2                            | Butin                        | ones    | 7  | 646  | 8   | Cyanidin-3-O-galactoside         | s       | 0    | 688  | 4   | Caffeic acid              | acids   | 4  | 647  |
| kz0 |                                  |         | 1. |      |                              |                              |         | 1. |      | kz0 |                                  |         | 1.   |      | kz0 |                           |         | 1. |      |
| 01  |                                  |         | 07 | km   |                              |                              |         | 06 |      | 02  |                                  | Pheno   | 06   |      | 00  |                           |         | 08 |      |
| 29  |                                  | Organi  | 26 | 0.45 | 08                           |                              | Flavon  | 90 | 3.59 | 55  |                                  | lic     | 99   | 2.28 | 28  |                           | Organi  | 57 | 0.21 |
| 7   | (Rs)-Mevalonic acid              | c acids | 8  | 620  | 14                           | Morin                        | ols     | 3  | 070  | 4   | p-Hydroxycinnamic acid           | acids   | 3    | 972  | 4   | 3-Hydroxypropanoic acid   | c acids | 8  | 794  |
|     |                                  |         | 1. | kz0  |                              |                              |         | 1. |      | kz0 |                                  |         | 1.   |      | kz0 |                           |         | 1. |      |
| km  |                                  |         | 02 | 04   |                              |                              |         | 05 |      | 00  |                                  | Pheno   | 07   |      | 03  |                           | Pheno   | 08 |      |
| 14  |                                  | Vitami  | 55 | 0.45 | 67                           |                              | Other   | 80 | 3.59 | 49  |                                  | lic     | 90   | 2.29 | 09  |                           | lic     | 64 | 0.22 |
| 05  | Nicotinic acid-hexoside          | ns      | 6  | 863  | 8                            | Annuionone D                 | s       | 0  | 453  | 6   | Vanillic acid                    | acids   | 5    | 229  | 8   | 3-O-Digalloyl quinic acid | acids   | 7  | 125  |
| kz0 |                                  |         | 1. | kz0  |                              |                              |         | 1. |      | kz0 |                                  |         | 1.   |      | kz0 |                           |         | 1. |      |
| 04  |                                  |         | 05 | 00   |                              |                              |         | 06 |      | 00  |                                  | Pheno   | 06   |      | 00  | p-                        | Pheno   | 08 |      |
| 13  |                                  | Vitami  | 36 | 0.46 | 15                           | Naringenin 7-O-glucoside     | Flavan  | 90 | 3.60 | 57  |                                  | lic     | 11   | 2.32 | 57  | Coumaroylferuloyltartari  | lic     | 90 | 0.23 |
| 3   | L-Ascorbic acid                  | ns      | 4  | 904  | 9                            | (Prunin)                     | ols     | 8  | 882  | 3   | p-Coumaroylferuloyltartaric acid | acids   | 8    | 036  | 3   | c acid                    | acids   | 2  | 075  |
| kz0 | 6-O-caffeoyl-β-glucose           | Pheno   | 1. | 0.47 | kz0                          | 5-Aminolevulinate            | Alkaloi | 1. | 3.61 | kz0 | Ayapin                           | Coum    | 1.   | 2.34 | kz0 | Aucubin                   | Terpe   | 1. | 0.23 |

|     |                                |         |    |      |     |                               |         |    |      |     |                              |         |    |      |     |                           |        |    |      |
|-----|--------------------------------|---------|----|------|-----|-------------------------------|---------|----|------|-----|------------------------------|---------|----|------|-----|---------------------------|--------|----|------|
| 02  |                                | lic     | 07 | 716  | 00  |                               | ds      | 06 | 282  | 03  |                              | arins   | 04 | 091  | 00  |                           | noids  | 08 | 226  |
| 55  |                                | acids   | 03 |      | 23  |                               |         | 90 |      | 26  |                              |         | 87 |      | 41  |                           |        | 71 |      |
| 8   |                                |         | 3  |      | 1   |                               |         | 5  |      | 2   |                              |         | 9  |      | 2   |                           |        | 7  |      |
| kz0 |                                |         | 1. |      | kz0 |                               |         | 1. |      | kz0 |                              |         | 1. |      | kz0 |                           |        | 1. |      |
| 00  |                                | Pheno   | 06 |      | 02  |                               |         | 05 |      | 01  |                              |         | 06 |      | 02  |                           |        | 09 |      |
| 54  | 1-O-[(E)-Caffeoyl]-β-D-        | lic     | 97 | 0.47 | 48  |                               | Quino   | 77 | 3.64 | 15  |                              | Vitami  | 14 | 2.34 | 22  |                           | Lignan | 05 | 0.23 |
| 9   | glucopyranose                  | acids   | 3  | 892  | 5   | 3-methoxy-juglone             | nes     | 6  | 044  | 6   | Pyridoxine                   | ns      | 6  | 336  | 0   | Olivil-4'-O-β-D-glucoside | s      | 8  | 878  |
| kz0 |                                |         | 1. |      | kz0 |                               |         | 1. |      | kz0 |                              |         | 1. |      | kz0 |                           |        | 1. |      |
| 01  |                                |         | 07 |      | 00  |                               |         | 07 |      | 04  |                              |         | 06 |      | 03  |                           |        | 08 |      |
| 59  |                                | Alkaloi | 05 | 0.48 | 43  |                               | Flavan  | 10 | 3.64 | 13  |                              | Vitami  | 87 | 2.36 | 81  | Kaempferol-malonyl-3-     | Flavon | 06 | 0.23 |
| 8   | Stachydrine                    | ds      | 0  | 105  | 4   | Pinobanksin                   | ols     | 8  | 092  | 3   | L-Ascorbic acid              | ns      | 6  | 217  | 1   | O-glucoside               | ols    | 1  | 941  |
| kz0 |                                |         | 1. |      | kz0 |                               |         | 1. |      | kz0 |                              |         | 1. |      | kz0 |                           |        | 1. |      |
| 05  |                                |         | 05 |      | 01  |                               |         | 06 |      | 00  |                              |         | 07 |      | 02  |                           | Pheno  | 08 |      |
| 37  |                                | Lignan  | 43 | 0.48 | 09  | Oleanolic acid 2-O-β-D-       | Terpe   | 24 | 3.66 | 99  |                              | Lignan  | 43 | 2.37 | 54  | Isosalicylic acid O-      | lic    | 29 | 0.25 |
| 0   | (+)-Isolariciresinol           | s       | 7  | 218  | 3   | glucopyranoside               | noids   | 5  | 434  | 2   | Pinoresinol                  | s       | 1  | 234  | 6   | glycoside                 | acids  | 0  | 156  |
| kz0 |                                |         | 1. |      | kz0 |                               |         | 1. |      | kz0 |                              |         | 1. |      | kz0 |                           |        | 1. |      |
| 00  |                                |         | 05 |      | 03  |                               |         | 03 |      | 03  |                              | Pheno   | 02 |      | 01  |                           | Pheno  | 08 |      |
| 29  |                                | Organi  | 28 | 0.48 | 11  |                               | Organi  | 76 | 3.72 | 79  |                              | lic     | 21 | 2.38 | 07  |                           | lic    | 72 | 0.25 |
| 4   | 2-Hydroxyisocaproic acid       | c acids | 1  | 891  | 6   | 2,4,6-trihydroxy benzoic acid | c acids | 2  | 965  | 6   | 1'-O-vanilloyl-β-D-glucoside | acids   | 5  | 230  | 5   | Methyl gallate            | acids  | 9  | 658  |
| kz0 |                                |         | 1. |      |     |                               |         | 1. |      | kz0 |                              |         | 1. |      | kz0 |                           |        | 1. |      |
| 00  |                                | Pheno   | 06 |      | km  |                               |         | 07 |      | 00  |                              | Pheno   | 08 |      | 00  |                           | Pheno  | 06 |      |
| 55  |                                | lic     | 97 | 0.49 | 08  |                               | Flavan  | 04 | 3.75 | 48  |                              | lic     | 04 | 2.38 | 05  | 3-O-p-                    | lic    | 09 | 0.25 |
| 0   | Coniferin                      | acids   | 7  | 157  | 49  | Naringenin chalcone           | ones    | 6  | 267  | 4   | Vanillin                     | acids   | 1  | 648  | 9   | Coumaroylshikimic acid    | acids  | 9  | 698  |
| kz0 |                                |         | 1. |      |     |                               |         | 1. |      | kz0 |                              |         | 1. |      | kz0 |                           |        | 1. |      |
| 01  |                                | Pheno   | 05 |      | km  |                               |         | 07 |      | 01  |                              | Pheno   | 06 |      | 00  |                           |        | 09 |      |
| 07  |                                | lic     | 56 | 2.00 | 08  |                               | Flavan  | 06 | 3.76 | 07  |                              | lic     | 12 | 2.39 | 99  |                           | Lignan | 02 | 0.26 |
| 5   | Methyl gallate                 | acids   | 6  | 149  | 43  | Naringenin                    | ones    | 2  | 856  | 5   | Methyl gallate               | acids   | 3  | 821  | 5   | Syringaresinol            | s      | 1  | 236  |
| kz0 |                                |         | 1. |      | kz0 |                               |         | 1. |      | kz0 |                              |         | 1. |      | kz0 |                           |        | 1. |      |
| 01  |                                |         | 05 |      | 05  |                               |         | 06 |      | 01  |                              |         | 06 |      | 02  |                           |        | 06 |      |
| 03  |                                | Other   | 25 | 2.02 | 05  |                               | Flavon  | 89 | 3.77 | 28  |                              | Organi  | 77 | 2.41 | 78  | Sexangularetin 3-         | Flavon | 49 | 0.26 |
| 2   | N-Acetyl-D-galactosamine       | s       | 7  | 646  | 4   | Chrysin-7-glucoside           | es      | 9  | 004  | 5   | 2-Methylsuccinic acid        | c acids | 0  | 187  | 8   | glucoside-7-rhamnoside    | ols    | 3  | 358  |
| kz0 |                                |         | 1. |      | kz0 |                               |         | 1. |      | kz0 |                              |         | 1. |      |     |                           |        | 1. |      |
| 00  |                                |         | 04 |      | 03  |                               |         | 03 |      | 01  |                              |         | 07 |      | km  |                           | Pheno  | 01 |      |
| 41  |                                | Terpe   | 85 | 2.10 | 79  |                               | Flavan  | 80 | 3.83 | 27  |                              | Organi  | 98 | 2.43 | 11  | 5-O-p-Coumaroyl           | lic    | 82 | 0.26 |
| 2   | Aucubin                        | noids   | 2  | 309  | 3   | Dihydromyricetin-O-glucoside  | ols     | 1  | 247  | 6   | Succinic acid                | c acids | 7  | 794  | 13  | shikimic acid             | acids  | 1  | 951  |
| kz0 |                                |         | 1. |      | kz0 |                               |         | 1. |      |     |                              |         | 1. |      | kz0 |                           |        | 1. |      |
| 00  |                                | Pheno   | 06 |      | 05  |                               |         | 06 |      | km  |                              |         | 04 |      | 00  | 3-Hydroxy-4-              | Pheno  | 08 |      |
| 50  |                                | lic     | 92 | 2.10 | 37  |                               | Lignan  | 64 | 3.85 | 00  | Genistein (4',5,7-           | Isoflav | 89 | 2.46 | 53  | isopropylbenzylalcohol    | lic    | 90 | 0.27 |
| 1   | Methyl p-coumarate             | acids   | 1  | 498  | 0   | (+)-Isolariciresinol          | s       | 3  | 273  | 81  | Trihydroxyisoflavone)        | ones    | 1  | 264  | 9   | 3-glucoside               | acids  | 0  | 193  |
| kz0 |                                |         | 1. |      | kz0 |                               | Pheno   | 1. |      | kz0 |                              |         | 1. |      | km  |                           |        | 1. |      |
| 03  | 3-O-(2-O-Acetyl-β-D-           | Terpe   | 06 | 2.11 | 00  |                               | lic     | 06 | 3.85 | 04  |                              | Terpe   | 08 | 2.47 | 08  |                           | Flavan | 09 | 0.27 |
| 03  | glucopyranosyl) oleanolic acid | noids   | 71 | 178  | 50  | Caffeic acid                  | acids   | 35 | 662  | 62  | pomolic acid                 | noids   | 04 | 750  | 43  | Naringenin                | ones   | 18 | 462  |

|     |                                   |         |    |      |     |                                  |         |    |      |     |                               |         |    |      |     |                             |         |    |      |
|-----|-----------------------------------|---------|----|------|-----|----------------------------------|---------|----|------|-----|-------------------------------|---------|----|------|-----|-----------------------------|---------|----|------|
| 8   |                                   |         | 2  |      | 4   |                                  | 3       |    | 6    |     | 2                             |         | 5  |      |     |                             |         |    |      |
| kz0 |                                   |         | 1. |      | kz0 |                                  | 1.      |    | kz0  |     | 1.                            |         | 1. |      |     |                             |         |    |      |
| 00  |                                   |         | 06 |      | 02  |                                  | 06      |    | 00   |     | 03                            | km      | 09 |      |     |                             |         |    |      |
| 41  |                                   | Terpe   | 82 | 2.13 | 94  |                                  | Flavon  | 55 | 3.92 | 92  |                               | Flavon  | 04 | 2.48 | 08  |                             | Flavan  | 11 | 0.28 |
| 0   | Sweroside                         | noids   | 7  | 944  | 9   | Hispidulin                       | es      | 8  | 014  | 0   | Quercetin-O-rutinoside-hexose | ols     | 0  | 893  | 49  | Naringenin chalcone         | ones    | 5  | 073  |
|     |                                   |         | 1. |      | kz0 |                                  |         | 1. |      | kz0 |                               |         | 1. |      | kz0 |                             |         | 1. |      |
| km  |                                   |         | 03 |      | 01  |                                  |         | 06 |      | 02  |                               |         | 07 |      | 03  |                             | Pheno   | 08 |      |
| 08  |                                   | Vitami  | 31 | 2.20 | 28  |                                  | Organi  | 94 | 3.94 | 21  |                               | Lignan  | 51 | 2.49 | 51  |                             | lic     | 78 | 0.28 |
| 79  | Orotic acid                       | ns      | 6  | 107  | 3   | 6-Aminocaproic acid              | c acids | 1  | 525  | 9   | Epipinoresinol                | s       | 0  | 688  | 7   | Glucosyloxybenzoic acid     | acids   | 7  | 273  |
| kz0 |                                   |         | 1. |      | kz0 |                                  |         | 1. |      | kz0 |                               |         | 1. |      | kz0 |                             |         | 1. |      |
| 01  |                                   | Pheno   | 05 |      | 00  |                                  | Pheno   | 06 |      | 02  |                               |         | 06 |      | 02  |                             | Pheno   | 07 |      |
| 81  |                                   | lic     | 76 | 2.20 | 55  |                                  | lic     | 79 | 3.96 | 22  |                               | Lignan  | 68 | 2.50 | 55  | 4-O-glucosyl-4-             | lic     | 05 | 0.28 |
| 9   | Salicylic acid                    | acids   | 1  | 623  | 4   | Chlorogenic acid                 | acids   | 0  | 755  | 0   | Olivil-4'-O-β-D-glucoside     | s       | 0  | 731  | 6   | hydroxybenzoic acid         | acids   | 0  | 460  |
| kz0 |                                   |         | 1. |      | kz0 |                                  |         | 1. |      | kz0 |                               |         | 1. |      | kz0 |                             |         | 1. |      |
| 05  |                                   |         | 02 |      | 00  |                                  |         | 06 |      | 01  |                               |         | 08 |      | 02  |                             |         | 08 |      |
| 13  | Isoscopoletin (6-Hydroxy-7-       | Coum    | 05 | 2.25 | 41  |                                  | Terpe   | 28 | 4.05 | 08  |                               | Terpe   | 01 | 2.50 | 85  |                             | Alkaloi | 99 | 0.28 |
| 7   | Methoxycoumarin)                  | arins   | 7  | 844  | 0   | Sweroside                        | noids   | 5  | 710  | 7   | Maslinic acid                 | noids   | 6  | 938  | 3   | Dihydroisopelletierine      | ds      | 1  | 480  |
| kz0 |                                   |         | 1. |      | kz0 |                                  |         | 1. |      | kz0 |                               |         | 1. |      | kz0 |                             |         | 1. |      |
| 00  |                                   | Pheno   | 06 |      | 00  |                                  |         | 06 |      | 00  |                               | Pheno   | 07 |      | 00  |                             |         | 09 |      |
| 53  |                                   | lic     | 47 | 2.26 | 12  |                                  | Flavon  | 74 | 4.11 | 04  |                               | lic     | 96 | 2.51 | 42  |                             | Flavan  | 10 | 0.28 |
| 2   | Protocatechuic acid-4-glucoside   | acids   | 4  | 794  | 1   | Chrysin 5-O-glucoside (Toringin) | es      | 2  | 841  | 9   | 2-(Formylamino)benzoic acid   | acids   | 4  | 801  | 2   | Butin                       | ones    | 7  | 847  |
| kz0 |                                   |         | 1. |      | kz0 |                                  |         | 1. |      | kz0 |                               |         | 1. |      | kz0 |                             |         | 1. |      |
| 03  |                                   |         | 00 |      | 00  |                                  |         | 06 |      | 01  |                               |         | 08 |      | 00  |                             |         | 09 |      |
| 85  | (-)-secoisolariciresinol 4-O-β-D- | Lignan  | 08 | 2.27 | 14  |                                  | Isoflav | 81 | 4.12 | 27  |                               | Organi  | 00 | 2.52 | 43  |                             | Flavan  | 18 | 0.29 |
| 0   | giucopyranoside                   | s       | 9  | 410  | 5   | Formononetin                     | ones    | 3  | 330  | 5   | Methylmalonic acid            | c acids | 4  | 254  | 4   | Pinobanksin                 | ols     | 4  | 289  |
| kz0 |                                   |         | 1. |      | kz0 |                                  |         | 1. |      | kz0 |                               |         | 1. |      | kz0 |                             |         | 1. |      |
| 01  |                                   |         | 05 |      | 00  |                                  | Pheno   | 06 |      | 01  |                               |         | 07 |      | 00  |                             | Pheno   | 05 |      |
| 10  |                                   | Alkaloi | 92 | 2.28 | 47  |                                  | lic     | 42 | 4.19 | 08  |                               | Terpe   | 91 | 2.54 | 53  | 2,5-Dihydroxy benzoic       | lic     | 90 | 0.29 |
| 5   | Acetylcholine                     | ds      | 8  | 872  | 5   | 4-Hydroxybenzoic acid            | acids   | 4  | 149  | 9   | 2-Hydroxyoleanolic acid       | noids   | 1  | 107  | 3   | acid O-hexside              | acids   | 9  | 836  |
| kz0 |                                   |         | 1. |      | kz0 |                                  |         | 1. |      | kz0 |                               |         | 1. |      | kz0 |                             |         | 1. |      |
| 01  |                                   |         | 06 |      | 00  |                                  | Pheno   | 04 |      | 03  |                               |         | 08 |      | 05  |                             |         | 08 |      |
| 15  |                                   | Vitami  | 35 | 2.37 | 04  |                                  | lic     | 73 | 4.23 | 54  |                               | Other   | 12 | 2.56 | 37  | Isolariciresinol 9'-O-      | Lignan  | 55 | 0.30 |
| 7   | 4-Pyridoxic acid                  | ns      | 0  | 074  | 7   | Mandelic acid                    | acids   | 5  | 277  | 9   | Hederagenin                   | s       | 9  | 396  | 5   | Glucoside                   | s       | 4  | 355  |
| kz0 |                                   |         | 1. |      | kz0 |                                  |         | 1. |      | kz0 |                               |         | 1. |      | kz0 |                             |         | 1. |      |
| 01  |                                   |         | 05 |      | 04  |                                  |         | 06 |      | 04  |                               |         | 07 |      | 03  | dihydrodehydrodiconifer     |         | 08 |      |
| 10  |                                   | Alkaloi | 44 | 2.42 | 03  |                                  | Alkaloi | 76 | 4.35 | 62  |                               | Terpe   | 94 | 2.56 | 84  | yl alcohol 4-O-β-D-         | Lignan  | 83 | 0.30 |
| 3   | 6-Hydroxynicotinic acid           | ds      | 5  | 076  | 5   | 3-Indoleacrylic acid             | ds      | 2  | 854  | 7   | alphitolic acid               | noids   | 2  | 831  | 9   | glucopyranosides            | s       | 7  | 404  |
| kz0 |                                   |         | 1. |      | kz0 |                                  |         | 1. |      | kz0 |                               |         | 1. |      | kz0 |                             |         | 1. |      |
| 00  |                                   |         | 06 |      | 01  |                                  |         | 04 |      | 01  |                               | Pheno   | 05 |      | 03  |                             | Pheno   | 08 |      |
| 88  | Kaempferol-3-O-glucoside          | Flavon  | 55 | 2.42 | 01  | 3-Amino-1-propionic sulfonic     | Other   | 54 | 4.35 | 07  |                               | lic     | 59 | 2.57 | 72  |                             | lic     | 33 | 0.30 |
| 4   | (Astragalin)                      | ols     | 7  | 124  | 8   | acid                             | s       | 7  | 860  | 6   | Ethyl gallate                 | acids   | 2  | 566  | 1   | Maplexin G                  | acids   | 9  | 413  |
| kz0 | dihydrodehydrodiconiferyl         | Lignan  | 1. | 2.43 | kz0 | N-Acetyl-D-glucosamine 1-        | Other   | 1. | 4.38 | kz0 | p-Coumaric acid               | Pheno   | 1. | 2.58 | kz0 | (-)-secoisolariciresinol 4- | Lignan  | 1. | 0.30 |

|     |                                  |                 |         |    |      |     |                               |              |     |      |      |                                  |         |    |      |     |                          |         |    |      |
|-----|----------------------------------|-----------------|---------|----|------|-----|-------------------------------|--------------|-----|------|------|----------------------------------|---------|----|------|-----|--------------------------|---------|----|------|
| 03  | alcohol                          | 4-O-β-D-        | s       | 06 | 638  | 01  | phosphate                     | s            | 07  | 410  | 00   |                                  | lic     | 07 | 240  | 03  | O-β-D-giucopyranoside    | s       | 08 | 642  |
| 84  | glucopyranosides                 |                 |         | 83 |      | 04  |                               |              | 01  |      | 49   |                                  | acids   | 17 |      | 85  |                          |         | 75 |      |
| 9   |                                  |                 |         | 7  |      | 1   |                               |              | 0   |      | 1    |                                  |         | 0  |      | 0   |                          |         | 5  |      |
| kz0 |                                  |                 |         | 1. |      | kz0 |                               |              | 1.  |      | kz0  |                                  |         | 1. |      | kz0 |                          |         | 1. |      |
| 00  |                                  |                 |         | 06 |      | 04  |                               |              | 04  |      | 01   |                                  |         | 07 |      | 02  | 2'-Hydoxy,5-methoxy      |         | 04 |      |
| 25  |                                  |                 | Vitami  | 76 | 2.45 | 73  |                               | Other        | 38  | 4.45 | 08   | 3,24-Dihydroxy-17,21-            | Terpe   | 95 | 2.58 | 19  | Genistein-O-rhamnosyl-   | Isoflav | 14 | 0.30 |
| 8   | Nicotinate D-ribonucleoside      |                 | ns      | 1  | 854  | 5   | Ligraminol E                  | s            | 3   | 023  | 8    | semiacetal-12(13)oleanolic fruit | noids   | 5  | 621  | 6   | glucoside                | ones    | 8  | 708  |
| kz0 |                                  |                 |         | 1. |      | kz0 |                               |              | 1.  |      | kz0  |                                  |         | 1. |      | kz0 |                          |         | 1. |      |
| 00  |                                  |                 | Pheno   | 07 |      | 02  |                               | Pheno        | 06  |      | 00   |                                  |         | 07 |      | 00  |                          | Pheno   | 07 |      |
| 05  |                                  |                 | lic     | 06 | 2.49 | 06  | 4-α-L-Rhamnopyranosyl-ellagic | lic          | 71  | 4.48 | 29   |                                  | Organi  | 75 | 2.61 | 52  |                          | lic     | 12 | 0.30 |
| 1   | 4-Methoxycinnamic acid           |                 | acids   | 0  | 319  | 5   | acid                          | acids        | 7   | 941  | 0    | Aminomalonic acid                | c acids | 1  | 736  | 0   | Sinapic acid             | acids   | 3  | 805  |
|     |                                  |                 |         | 1. |      | kz0 |                               |              | 1.  |      | kz0  |                                  |         | 1. |      | kz0 |                          |         | 1. |      |
| km  |                                  |                 | Pheno   | 07 |      | 00  |                               | Pheno        | 06  |      | 03   |                                  | Pheno   | 07 |      | 03  |                          |         | 08 |      |
| 13  |                                  |                 | lic     | 11 | 2.53 | 48  |                               | lic          | 93  | 4.51 | 09   |                                  | lic     | 55 | 2.62 | 15  |                          | Other   | 85 | 0.30 |
| 00  | Hydroxy-methoxycinnamate         |                 | acids   | 6  | 063  | 7   | 2,5-Dihydroxybenzoic acid     | acids        | 3   | 498  | 7    | 3,4-Di-O-galloyl-shikimic acid   | acids   | 3  | 830  | 1   | Ailantinol E             | s       | 2  | 916  |
| kz0 |                                  |                 |         | 1. |      | kz0 |                               |              | 1.  |      | kz0  |                                  |         | 1. |      |     |                          |         | 1. |      |
| 02  |                                  |                 |         | 06 |      | 00  | Catechin-(7,8-bc)-4β-(3,4-    |              | 07  |      | 03   |                                  | Pheno   | 02 |      | km  |                          |         | 03 |      |
| 78  | Kaempferol 3-O-β-d-(6''-O-(E)-p- |                 | Flavon  | 00 | 2.53 | 97  | dihydroxyphenyl)-dihydro-2-   | Flavan       | 06  | 4.56 | 72   |                                  | lic     | 74 | 2.64 | 06  | Genistein 7-O-Glucoside  | Isoflav | 96 | 0.31 |
| 3   | coumaroyl) glucopyranoside       |                 | ols     | 5  | 750  | 8   | (3H)-pyranone                 | ols          | 7   | 812  | 0    | Maplexin H                       | acids   | 4  | 700  | 02  | (Genistin)               | ones    | 3  | 645  |
| kz0 |                                  |                 |         | 1. |      | kz0 |                               |              | 1.  |      |      |                                  |         | 1. |      | kz0 |                          |         | 1. |      |
| 00  |                                  |                 | Pheno   | 05 |      | 00  | Catechin-(7,8-bc)-4α-(3,4-    |              | 07  |      | km   |                                  |         | 05 |      | 04  |                          |         | 07 |      |
| 51  |                                  |                 | lic     | 71 | 2.54 | 97  | dihydroxyphenyl)-dihydro-2-   | Flavan       | 05  | 4.62 | 02   |                                  | Flavon  | 56 | 2.67 | 01  | Cis-p-coumaric acid 4-O- | Other   | 70 | 0.32 |
| 2   | Syringic acid                    |                 | acids   | 6  | 720  | 9   | (3H)-pyranone                 | ols          | 3   | 460  | 35   | Apigenin                         | es      | 9  | 204  | 5   | glucoside                | s       | 4  | 180  |
| kz0 |                                  |                 |         | 1. |      |     |                               |              | 1.  |      | kz0  |                                  |         | 1. |      | kz0 |                          |         | 1. |      |
| 01  |                                  |                 |         | 04 |      | km  |                               |              | 06  |      | 01   |                                  |         | 08 |      | 00  |                          |         | 07 |      |
| 11  |                                  |                 | Alkaloi | 38 | 2.57 | 05  |                               | Flavan       | 47  | 4.71 | 09   |                                  | Terpe   | 14 | 2.71 | 79  |                          | Flavon  | 82 | 0.32 |
| 3   | Lumichrome                       |                 | ds      | 3  | 143  | 73  | Epicatechin gallate (ECG)     | ols          | 4   | 816  | 1    | Euscaphic acid                   | noids   | 3  | 197  | 2   | Apigenin 5-O-glucoside   | es      | 8  | 197  |
| kz0 |                                  |                 |         | 1. |      | kz0 |                               |              | 1.  |      | kz0  |                                  |         | 1. |      | kz0 |                          |         | 1. |      |
| 05  |                                  |                 |         | 06 |      | 01  |                               |              | 06  |      | 00   |                                  | Pheno   | 04 |      | 00  |                          |         | 08 |      |
| 37  |                                  |                 | Lignan  | 14 | 2.59 | 30  |                               | Organi       | 97  | 4.73 | 05   | Ethyl 3,4-Dihydroxybenzoate      | lic     | 45 | 2.71 | 91  | Isorhamnetin-3-O-        | Flavon  | 88 | 0.32 |
| 5   | Isolariciresinol 9'-O-Glucoside  |                 | s       | 8  | 660  | 2   | 2,3-Dihydroxybenzoic Acid     | c acids      | 4   | 342  | 2    | (Ethyl protocatechuate)          | acids   | 4  | 783  | 2   | rutinoside (Narcissin)   | ols     | 9  | 445  |
| kz0 |                                  |                 |         | 1. |      | kz0 |                               |              | 1.  |      | kz0  |                                  |         | 1. |      | kz0 |                          |         | 1. |      |
| 00  |                                  |                 |         | 05 |      | 00  |                               | Pheno        | 06  |      | 02   |                                  |         | 07 |      | 00  |                          | Pheno   | 09 |      |
| 25  |                                  |                 | Vitami  | 07 | 2.59 | 48  |                               | lic          | 92  | 4.74 | 93   |                                  | Terpe   | 03 | 2.73 | 54  | 3,4,5-Trimethoxyphenyl-  | lic     | 08 | 0.32 |
| 9   | Thiamine                         |                 | ns      | 2  | 858  | 9   | Protocatechuic acid           | acids        | 2   | 595  | 3    | Ixerin D                         | noids   | 3  | 798  | 0   | β-D-Glucopyranoside      | acids   | 8  | 704  |
| kz0 |                                  |                 |         | 1. |      | kz0 |                               |              | 1.  |      | kz0  |                                  |         | 1. |      | kz0 |                          |         | 1. |      |
| 04  |                                  |                 |         | 04 |      | 00  |                               |              | 06  |      | 00   |                                  |         | 06 |      | 01  |                          | Pheno   | 08 |      |
| 17  | Kaempferol                       | 3-O-β-D-        | Flavon  | 89 | 2.62 | 29  |                               | Organi       | 78  | 4.98 | 29   |                                  | Organi  | 81 | 2.81 | 63  |                          | lic     | 86 | 0.33 |
| 1   | neohesperidoside                 |                 | ols     | 3  | 687  | 4   | 2-Hydroxyisocaproic acid      | c acids      | 3   | 653  | 4    | 2-Hydroxyisocaproic acid         | c acids | 2  | 987  | 7   | Oresbuisin A             | acids   | 8  | 067  |
| km  |                                  |                 |         | 1. |      | kz0 |                               | Pheno        | 1.  |      | kz0  |                                  |         | 1. |      | kz0 |                          | Pheno   | 1. |      |
| 06  | Kaempferol                       | 3-O-galactoside | Flavon  | 06 | 2.65 | 00  | Anthranilate                  | O-hexosyl-O- | lic | 07   | 5.00 | 01                               |         | 04 | 2.84 | 02  |                          | lic     | 09 | 0.33 |
| 83  | (Trifolin)                       |                 | ols     | 64 | 608  | 07  | hexoside                      | acids        | 06  | 455  | 03   | N-Acetyl-D-galactosamine         | s       | 94 | 292  | 55  | 6-O-caffeoyl-β-glucose   | acids   | 09 | 256  |



|     |                                |        |    |      |     |                                |        |      |      |     |                                  |      |      |                         |                           |
|-----|--------------------------------|--------|----|------|-----|--------------------------------|--------|------|------|-----|----------------------------------|------|------|-------------------------|---------------------------|
|     |                                |        | 0  |      | 0   |                                | 9      |      | 2    |     | 3                                |      | 8    |                         | 2                         |
| kz0 |                                |        | 1. |      | kz0 |                                | 1.     |      | kz0  |     | 1.                               |      | kz0  |                         | 1.                        |
| 02  | Galloyl-                       | Pheno  | 00 |      | 00  |                                | 06     |      | 01   |     | 07                               |      | 03   |                         | 07                        |
| 06  | HHDP(Hexahydroxydiphenyl)-     | lic    | 99 | 2.69 | 06  |                                | 94     | 5.08 | 26   |     | 89                               | 2.86 | 86   |                         | 70                        |
| 3   | glueopy ranose                 | acids  | 4  | 088  | 8   | Catechin gallate               | acids  | 3    | 402  | 8   | 2-Furanoic acid                  | 6    | 430  | 0                       | 300                       |
| kz0 |                                |        | 1. |      | kz0 |                                | 1.     |      | kz0  |     | 1.                               |      | kz0  |                         | 1.                        |
| 00  |                                | Pheno  | 06 |      | 00  |                                | 06     |      | 01   |     | 00                               |      | 00   |                         | 03                        |
| 51  |                                | lic    | 94 | 2.71 | 56  |                                | 99     | 5.31 | 31   |     | 38                               | 2.91 | 50   |                         | 23                        |
| 4   | 3,4-Dimethoxycinnamic acid     | acids  | 3  | 760  | 0   | Trihydroxycinnamoylquinic acid | acids  | 2    | 420  | 3   | SubericAcid                      | 9    | 019  | 5                       | 757                       |
|     |                                |        | 1. |      | kz0 |                                | 1.     |      | kz0  |     | 1.                               |      | kz0  |                         | 1.                        |
| km  |                                |        | 06 |      | 03  |                                | 07     |      | 00   |     | 05                               |      | 04   |                         | 07                        |
| 07  |                                | Flavon | 95 | 2.77 | 10  |                                | 07     | 5.41 | 04   |     | 12                               | 2.94 | 63   | 2α-hydroxypyra          | 89                        |
| 79  | Luteolin 7-O-glucoside         | es     | 7  | 523  | 0   | 5-O-Galloylhamamelose          | acids  | 3    | 880  | 7   | Mandelic acid                    | 2    | 731  | 6                       | 764                       |
| kz0 |                                |        | 1. |      | kz0 |                                | 1.     |      | kz0  |     | 1.                               |      | kz0  |                         | 1.                        |
| 03  |                                |        | 06 |      | 03  |                                | 07     |      | 04   |     | 07                               |      | 00   |                         | 08                        |
| 57  |                                | Flavon | 54 | 2.77 | 49  |                                | 05     | 5.53 | 67   |     | 75                               | 3.02 | 54   | 1-O-[(E)-Caffeoyl]-β-D- | 77                        |
| 2   | Biondnoid I                    | ols    | 4  | 758  | 7   | 3-O-Galloyl-β-D-glucose        | acids  | 8    | 448  | 8   | Annuionone D                     | 6    | 735  | 9                       | 918                       |
| kz0 |                                |        | 1. |      | kz0 |                                | 1.     |      | kz0  |     | 1.                               |      | kz0  |                         | 1.                        |
| 03  |                                | Pheno  | 05 |      | 00  |                                | 06     |      | 05   |     | 07                               |      | 00   |                         | 08                        |
| 71  |                                | lic    | 10 | 2.79 | 25  |                                | 10     | 5.67 | 24   |     | 69                               | 3.15 | 07   | Anthranilate O-hexosyl- | 80                        |
| 8   | 2,3-Di-O-Galloyl-D-Glucose     | acids  | 7  | 138  | 9   | Thiamine                       | ns     | 8    | 838  | 7   | Limonin                          | 3    | 267  | 0                       | 112                       |
| kz0 |                                |        | 1. |      | kz0 |                                | 1.     |      | kz0  |     | 1.                               |      | kz0  |                         | 1.                        |
| 03  |                                |        | 06 |      | 04  |                                | 06     |      | 05   |     | 07                               |      | 05   |                         | 07                        |
| 69  | Quercetin-3-O-α-L-             | Flavon | 30 | 2.79 | 66  |                                | 74     | 5.70 | 38   |     | 79                               | 3.19 | 05   |                         | 68                        |
| 0   | rhamnopyranoside               | ols    | 5  | 813  | 7   | Myricetin-O-rhamnoside         | ols    | 1    | 000  | 5   | Machilusolide D                  | 0    | 165  | 5                       | 186                       |
| kz0 |                                |        | 1. |      | kz0 |                                | 1.     |      | kz0  |     | 1.                               |      | kz0  |                         | 1.                        |
| 05  |                                |        | 06 |      | 03  |                                | 07     |      | 01   |     | 08                               |      | 00   |                         | 04                        |
| 07  | Kaempferol-7-O-β-D-            | Flavon | 86 | 2.83 | 71  |                                | 08     | 5.77 | 15   |     | 08                               | 3.22 | 79   | Apigenin 7-O-           | 32                        |
| 8   | glucopyranoside                | ols    | 6  | 539  | 4   | 6-O-Galloyl-β-D-glucose        | acids  | 4    | 384  | 7   | 4-Pyridoxic acid                 | 6    | 343  | 1                       | 247                       |
| kz0 |                                |        | 1. |      |     |                                | 1.     |      | kz0  |     | 1.                               |      | kz0  |                         | 1.                        |
| 02  |                                | Pheno  | 05 |      | km  |                                | 01     |      | 04   |     | 07                               |      | 03   |                         | 08                        |
| 55  |                                | lic    | 91 | 2.87 | 05  | Delphinidin 3-O-glucoside      | cyanin | 80   | 5.79 | 63  |                                  | 09   | 3.44 | 09                      | 3,4-Di-O-galloyl-shikimic |
| 2   | Sinapic acid-glycoside         | acids  | 4  | 392  | 32  | (Mirtillin)                    | s      | 1    | 622  | 6   | 2α-hydroxypyra                   | 6    | 325  | 7                       | 370                       |
| kz0 |                                |        | 1. |      | kz0 |                                | 1.     |      | kz0  |     | 1.                               |      | kz0  |                         | 1.                        |
| 03  |                                | Pheno  | 05 |      | 04  |                                | 06     |      | km   |     | 07                               |      | 00   |                         | 06                        |
| 09  |                                | lic    | 23 | 2.91 | 13  |                                | 76     | 5.84 | 08   |     | 97                               | 3.51 | 30   |                         | 58                        |
| 7   | 3,4-Di-O-galloyl-shikimic acid | acids  | 9  | 301  | 3   | L-Ascorbic acid                | ns     | 0    | 708  | 14  | Morin                            | 9    | 628  | 2                       | 531                       |
| kz0 |                                |        | 1. |      | kz0 |                                | 1.     |      | kz0  |     | 1.                               |      | kz0  |                         | 1.                        |
| 02  |                                |        | 05 |      | 03  |                                | 06     |      | 01   |     | 02                               |      | 02   |                         | 08                        |
| 22  |                                | Other  | 32 | 2.92 | 14  |                                | 76     | 5.88 | 28   |     | 87                               | 3.62 | 55   |                         | 71                        |
| 3   | Eucommia                       | s      | 6  | 261  | 7   | Clemaphenol A                  | s      | 1    | 031  | 3   | 6-Aminocaproic acid              | 3    | 077  | 2                       | 595                       |
| kz0 | Annuionone D                   | Other  | 1. | 2.94 | kz0 | Quercetin-7-O-Glucoside        | Flavon | 1.   | 5.98 | kz0 | (S)-(-)-2-Hydroxyisocaproic acid | 1.   | 3.70 | kz0                     | 0.35                      |

|     |                                |         |    |      |     |                                  |                |        |      |      |                              |                   |         |      |      |                            |            |         |      |      |      |
|-----|--------------------------------|---------|----|------|-----|----------------------------------|----------------|--------|------|------|------------------------------|-------------------|---------|------|------|----------------------------|------------|---------|------|------|------|
| 04  |                                | s       | 06 | 676  | 00  |                                  | ols            | 07     | 684  | 01   |                              | c acids           | 06      | 243  | 03   | acid                       | c acids    | 05      | 290  |      |      |
| 67  |                                |         | 24 |      | 89  |                                  |                | 05     |      | 28   |                              |                   | 39      |      | 11   |                            |            | 91      |      |      |      |
| 8   |                                |         | 2  |      | 0   |                                  |                | 5      |      | 7    |                              |                   | 9       |      | 6    |                            |            | 4       |      |      |      |
| kz0 |                                |         | 1. |      | kz0 |                                  |                | 1.     |      | kz0  |                              |                   | 1.      |      | kz0  |                            |            | 1.      |      |      |      |
| 02  |                                |         | 03 |      | 01  |                                  |                | 05     |      | 01   |                              | Pheno             | 07      |      | 00   |                            |            | 08      |      |      |      |
| 60  | Kaempferol-3-O-(6''-acetyl)-   | Flavon  | 79 | 2.95 | 58  |                                  | Flavon         | 82     | 6.00 | 64   | 5'-Glucopyranosyloxyjasmanic | lic               | 30      | 3.75 | 99   |                            | Lignan     | 73      | 0.35 |      |      |
| 4   | glucoside                      | ols     | 4  | 830  | 6   | Isotamarixin                     | ols            | 7      | 153  | 2    | acid                         | acids             | 4       | 554  | 2    | Pinoresinol                | s          | 0       | 542  |      |      |
| kz0 |                                |         | 1. |      |     |                                  |                | 1.     |      | kz0  |                              |                   | 1.      |      | kz0  |                            |            | 1.      |      |      |      |
| 00  |                                |         | 06 |      | km  |                                  |                | 07     |      | 00   |                              | Pheno             | 08      |      | 00   |                            |            | 07      |      |      |      |
| 86  |                                | Flavon  | 30 | 2.96 | 09  | Quercetin                        | 4'-O-glucoside | Flavon | 00   | 6.09 | 48                           |                   | lic     | 07   | 3.82 | 27                         |            | Alkaloi | 66   | 0.35 |      |
| 6   | Quercetin                      | ols     | 8  | 931  | 34  | (Spiraeoside)                    | ols            | 7      | 726  | 7    | 2,5-Dihydroxybenzoic acid    | acids             | 8       | 936  | 8    | Indole 3-acetic acid (IAA) | ds         | 2       | 623  |      |      |
| kz0 |                                |         | 1. |      | kz0 |                                  |                | 1.     |      | kz0  |                              |                   | 1.      |      | kz0  |                            |            | 1.      |      |      |      |
| 01  |                                |         | 07 |      | 03  |                                  |                | 03     |      | 03   |                              |                   | 04      |      | 01   |                            |            | 08      |      |      |      |
| 09  |                                | Alkaloi | 16 | 2.97 | 15  |                                  |                | 94     | 6.13 | 72   |                              | Terpe             | 86      | 3.96 | 02   | 4-Methyl-5-                | Other      | 83      | 0.35 |      |      |
| 6   | Choline                        | ds      | 5  | 053  | 8   | Ailanindole                      | ds             | 3      | 493  | 8    | Geniposide                   | noids             | 6       | 040  | 0    | thiazoleethanol            | s          | 8       | 675  |      |      |
| kz0 |                                |         | 1. |      | kz0 |                                  |                | 1.     |      | kz0  |                              |                   | 1.      |      | kz0  |                            |            | 1.      |      |      |      |
| 02  |                                |         | 04 |      | 00  | 3-Hydroxy-4-                     | Pheno          | 06     |      | 00   |                              |                   | 01      |      | 02   |                            | Pheno      | 08      |      |      |      |
| 99  |                                | Flavon  | 30 | 2.99 | 53  | isopropylbenzylalcohol           | 3-             | lic    | 75   | 6.54 | 23                           |                   | Alkaloi | 43   | 4.03 | 54                         | p-Coumaric | acid-O- | lic  | 66   | 0.35 |
| 0   | Luteolin-7-O-rutinoside        | es      | 0  | 486  | 9   | glucoside                        |                | acids  | 9    | 618  | 1                            | 5-Aminolevulinate | ds      | 4    | 545  | 8                          | glycoside  | acids   | 1    | 735  |      |
| kz0 |                                |         | 1. |      |     |                                  |                | 1.     |      | kz0  |                              |                   | 1.      |      | kz0  |                            |            | 1.      |      |      |      |
| 00  |                                |         | 06 |      | km  |                                  |                | 07     |      | 01   |                              |                   | 07      |      | 00   |                            | Pheno      | 09      |      |      |      |
| 90  | Kaempferol-3-O-                | Flavon  | 65 | 3.00 | 12  |                                  |                | 10     | 6.67 | 09   |                              | Alkaloi           | 53      | 4.09 | 55   |                            | lic        | 14      | 0.35 |      |      |
| 6   | robinobioside(Biorobin)        | ols     | 7  | 404  | 69  | Di-O-methylquercetin             | ols            | 0      | 062  | 7    | Betaine                      | ds                | 4       | 177  | 0    | Coniferin                  | acids      | 7       | 896  |      |      |
| kz0 |                                |         | 1. |      | kz0 |                                  |                | 1.     |      | kz0  |                              |                   | 1.      |      | kz0  |                            |            | 1.      |      |      |      |
| 00  |                                |         | 06 |      | 00  |                                  |                | 06     |      | 01   |                              |                   | 07      |      | 00   |                            | Pheno      | 08      |      |      |      |
| 90  | Kaempferol-3-O-                | Flavon  | 96 | 3.02 | 99  |                                  |                | 89     | 6.67 | 30   |                              | Organi            | 96      | 4.09 | 55   |                            | lic        | 70      | 0.36 |      |      |
| 5   | rutinoside(Nicotiflorin)       | ols     | 1  | 306  | 2   | Pinoresinol                      | s              | 9      | 471  | 2    | 2,3-Dihydroxybenzoic Acid    | c acids           | 3       | 883  | 4    | Chlorogenic acid           | acids      | 1       | 245  |      |      |
| kz0 |                                |         | 1. |      | kz0 |                                  |                | 1.     |      | kz0  |                              |                   | 1.      |      | kz0  |                            |            | 1.      |      |      |      |
| 00  |                                |         | 06 |      | 02  |                                  |                | 06     |      | 01   |                              |                   | 07      |      | 02   |                            |            | 08      |      |      |      |
| 81  |                                | Flavon  | 72 | 3.02 | 21  |                                  |                | 82     | 6.77 | 08   |                              | Terpe             | 23      | 4.23 | 21   |                            | Lignan     | 44      | 0.36 |      |      |
| 2   | Tricin O-saccharic acid        | es      | 5  | 732  | 9   | Epipinoresinol                   | s              | 8      | 903  | 4    | Ursolic acid                 | noids             | 2       | 613  | 9    | Epipinoresinol             | s          | 5       | 832  |      |      |
| kz0 |                                |         | 1. |      | kz0 |                                  |                | 1.     |      | kz0  |                              |                   | 1.      |      | kz0  |                            |            | 1.      |      |      |      |
| 01  |                                |         | 05 |      | 00  |                                  |                | 06     |      | 00   |                              |                   | 06      |      | 01   |                            |            | 08      |      |      |      |
| 18  | Esculin(6,7-DihydroxyCoumarin- | Coum    | 34 | 3.04 | 55  | Neochlorogenic                   | acid(5-O-      | lic    | 29   | 6.84 | 25                           |                   | Vitami  | 56   | 4.26 | 09                         |            | Alkaloi | 49   | 0.37 |      |
| 8   | 6-glucoside)                   | arins   | 9  | 864  | 3   | Caffeoylquinic acid)             |                | acids  | 9    | 868  | 9                            | Thiamine          | ns      | 2    | 344  | 7                          | Betaine    | ds      | 3    | 370  |      |
| kz0 |                                |         | 1. |      | kz0 |                                  |                | 1.     |      | kz0  |                              |                   | 1.      |      | kz0  |                            |            | 1.      |      |      |      |
| 00  |                                |         | 07 |      | 01  |                                  |                | 06     |      | 00   |                              |                   | 07      |      | 01   |                            | Pheno      | 06      |      |      |      |
| 79  | Luteolin-7-O-                  | Flavon  | 26 | 3.06 | 28  |                                  |                | 51     | 7.06 | 48   |                              | lic               | 96      | 4.27 | 07   |                            | lic        | 75      | 0.38 |      |      |
| 5   | glucoside(Cynaroside)          | es      | 1  | 588  | 7   | (S)-(-)-2-Hydroxyisocaproic acid | c acids        | 6      | 891  | 9    | Protocatechuic acid          | acids             | 1       | 432  | 9    | Galloyl Methyl gallate     | acids      | 8       | 080  |      |      |
| kz0 |                                | Antho   | 1. |      | kz0 |                                  |                | 1.     |      | kz0  |                              | Pheno             | 1.      |      | kz0  |                            |            | 1.      |      |      |      |
| 00  |                                | cyanin  | 02 | 3.07 | 01  |                                  |                | 07     | 7.07 | 00   |                              | lic               | 07      | 4.70 | 00   | DL-Glyceraldehyde          | 3-         | Organi  | 07   | 0.38 |      |
| 69  | Cyanidin-3-O-galactoside       | s       | 95 | 524  | 19  | Indole-3-carboxaldehyde          | ds             | 08     | 544  | 46   | 4-Hydroxybenzaldehyde        | acids             | 97      | 660  | 30   | phosphate                  | c acids    | 48      | 436  |      |      |

|     |                                             |               |               |     |                                        |                |               |     |                                  |               |               |     |                                                    |                |                  |
|-----|---------------------------------------------|---------------|---------------|-----|----------------------------------------|----------------|---------------|-----|----------------------------------|---------------|---------------|-----|----------------------------------------------------|----------------|------------------|
| 8   |                                             | 3             |               | 9   |                                        | 0              |               | 6   |                                  | 6             |               | 0   |                                                    | 9              |                  |
| kz0 |                                             | 1.            |               | kz0 |                                        | 1.             |               | kz0 |                                  | 1.            |               | kz0 |                                                    | 1.             |                  |
| 05  |                                             | 07            |               | 03  |                                        | 06             |               | 01  |                                  | 07            |               | 00  | Pheno                                              | 07             |                  |
| 19  | Poncirin(Isosakuranetin-7-neohesperidoside) | Flavones      | 30 3.08 4 352 | 84  | Cinchonain Ic                          | Flavones       | 79 7.09 3 376 | 29  | (Rs)-Mevalonic acid              | Organic acids | 51 4.77 1 381 | 53  | 5-Galloylshikimic acid                             | Phenolic acids | 90 0.38 2 560    |
| kz0 |                                             | 1.            |               | kz0 |                                        | 1.             |               | kz0 |                                  | 1.            |               | kz0 |                                                    | 1.             |                  |
| 00  |                                             | 07            |               | 00  |                                        | 07             |               | 00  |                                  | 07            |               | 03  |                                                    | 06             |                  |
| 90  |                                             | Flavones      | 25 3.09       | 20  |                                        | Others         | 14 7.12       | 86  |                                  | Flavones      | 75 4.80       | 86  | 3-O-Trans-feruloyl euscaphic acid                  | Terpenoids     | 75 0.39 2 931    |
| 4   | Tiliroside                                  | ols           | 9 789         | 1   | D-galacitol                            | s              | 2 746         | 4   | Kaempferol                       | ols           | 5 867         | 1   |                                                    |                |                  |
| kz0 |                                             | 1.            |               | kz0 |                                        | 1.             |               | kz0 |                                  | 1.            |               | kz0 |                                                    | 1.             |                  |
| 00  |                                             | 07            |               | 03  |                                        | Phenolic acids | 06 7.25       | 01  |                                  |               | 07            | 05  | (Kaempferol-3-O-β-D-galactoside-4'O-β-D-glucoside) | Flavones       | 02 94 0.40 6 163 |
| 20  |                                             | Others        | 35 3.09       | 72  | Maplexin G                             |                | 21 7.25       | 18  | Skimmin                          | Coumarins     | 80 4.81 4 691 | 08  |                                                    |                |                  |
| 1   | D-galacitol                                 | s             | 7 916         | 1   |                                        |                | 1 134         | 4   |                                  |               | 1.            | kz0 |                                                    | 1.             |                  |
| kz0 |                                             | 1.            |               | kz0 |                                        | 1.             |               | kz0 |                                  | 1.            |               | kz0 |                                                    | 1.             |                  |
| 05  |                                             | 07            |               | 00  |                                        | Phenolic acids | 05 7.27       | 03  |                                  |               | 07            | 04  |                                                    |                |                  |
| 13  |                                             | Flavones      | 30 3.14       | 58  | 5-O-p-Coumaroyl quinic acid O-hexoside | lic            | 35 7.27       | 86  |                                  | Terpenoids    | 75 5.06 2 530 | 13  | L-Ascorbic acid                                    | Vitamins       | 21 0.40 2 399    |
| 2   | Luteolin-caffeoyl-O-rhamnoside              | es            | 0 774         | 4   |                                        | acids          | 1 652         | 0   | Caffeoyl hawthorn acid           |               | 1.            | kz0 |                                                    | 1.             |                  |
| kz0 |                                             | 1.            |               | kz0 |                                        | 1.             |               | kz0 |                                  | 1.            |               | kz0 |                                                    | 1.             |                  |
| 02  |                                             | 03            |               | 01  |                                        |                | 05            | 02  |                                  |               | 06            | 05  |                                                    | Phenolic acids | 09 11 0.41 8 497 |
| 80  |                                             | Organic acids | 46 3.19       | 10  |                                        | Alkaloids      | 58 7.59       | 22  |                                  | Others        | 86 5.15 2 232 | 35  | Koaburaside                                        |                |                  |
| 7   | Dimethylmalonic acid                        | c acids       | 6 062         | 3   | 6-Hydroxynicotinic acid                | ds             | 3 341         | 3   | Eucommia                         | s             | 2 232         | 5   |                                                    |                |                  |
| kz0 |                                             | 1.            |               | kz0 |                                        | 1.             |               | kz0 |                                  | 1.            |               | kz0 |                                                    | 1.             |                  |
| 00  |                                             | Anthocyanins  | 01 3.19       | 01  |                                        |                | 06 7.59       | 00  |                                  |               | 07            | 01  |                                                    |                |                  |
| 70  | Cyanidin-3-O-glucoside (Kuromanin)          | s             | 99 969        | 70  | Isololiolide                           | Others         | 77 886        | 30  | 2-Isopropylmalate                | Organic acids | 94 5.17 2 149 | 01  | 3-Amino-1-propionic sulfonic acid                  | Others         | 70 0.42 9 076    |
| kz0 |                                             | 1.            |               | kz0 |                                        | 1.             |               |     |                                  |               | 1.            | kz0 |                                                    | 1.             |                  |
| 01  |                                             | 00            |               | 03  |                                        | Phenolic acids | 06 7.64       | km  |                                  |               | 08            | 00  |                                                    |                |                  |
| 31  |                                             | Organic acids | 46 3.21       | 09  |                                        | lic            | 97 7.64       | 12  |                                  | Flavones      | 12 5.17 2 773 | 91  | 6-Hydroxykaempferol-7,6-O-Diglucoside              | Flavones       | 03 0.42 5 239    |
| 3   | SubericAcid                                 | c acids       | 0 686         | 7   | 3,4-Di-O-galloyl-shikimic acid         | acids          | 4 717         | 69  | Di-O-methylquercetin             | ols           | 2 773         | 5   |                                                    |                |                  |
| kz0 |                                             | 1.            |               | kz0 |                                        | 1.             |               | kz0 |                                  | 1.            |               | kz0 |                                                    | 1.             |                  |
| 05  |                                             | 06            |               | 04  |                                        |                | 07            | 01  |                                  |               | 07            | 02  | 2'-Hydoxy,5-methoxy                                |                | 00               |
| 07  | Kaempferol-4'-O-β-D-glucopyranoside         | Flavones      | 33 3.23 9 418 | 75  | N-Benzylmethylene isomethylamine       | Alkaloids      | 00 8.03 6 292 | 29  | L-(+)-Tartaric acid              | Organic acids | 89 5.25 7 556 | 19  | Genistein-4',7-O-diglucoside                       | Isoflavones    | 75 0.42 1 683    |
| kz0 |                                             | 1.            |               | kz0 |                                        | 1.             |               | kz0 |                                  | 1.            |               | km  |                                                    | 1.             |                  |
| 01  |                                             | 07            |               | 00  |                                        |                | 05            | 04  |                                  |               | 05            | km  |                                                    | 08             |                  |
| 30  |                                             | Organic acids | 01 3.45       | 41  |                                        | Chalcones      | 94 8.05 2 133 | 75  | N-Benzylmethylene isomethylamine | Alkaloids     | 15 5.45 0 872 | 09  | Quercetin 7-O-β-D-Glucuronide                      | Flavones       | 88 0.43 4 055    |
| 8   | D-Xylonic acid                              | c acids       | 7 455         | 9   | Phlorizin                              |                | 2 133         | 6   |                                  |               | 1.            | kz0 |                                                    | 1.             |                  |
| kz0 |                                             | 1.            |               | kz0 |                                        | 1.             |               | kz0 |                                  | 1.            |               | kz0 |                                                    | 1.             |                  |
| 05  |                                             | 07            |               | 05  |                                        | Phenolic acids | 07 8.05       | 04  |                                  |               | 07            | 01  |                                                    |                |                  |
| 38  |                                             | Others        | 20 3.48       | 18  |                                        | lic            | 06 8.05       | 23  |                                  | Terpenoids    | 78 5.49 1 624 | 31  | D-Galacturonic acid(Gal A)                         | Organic acids  | 45 0.43 9 750    |
| 5   | Machilusolide D                             | s             | 8 257         | 6   | Dunalianoside C                        | acids          | 6 593         | 3   | Terminolic acid                  |               | 1.            | 9   |                                                    |                |                  |
| km  | Morin                                       | Flavones      | 1. 3.59       | km  | 3-(4-Hydroxyphenyl)propionic           | Phenolic acids | 1. 8.28       | kz0 | 4-Hydroxybenzoic acid            | Pheno         | 1. 5.53       | kz0 | 2-Picolylamine                                     | Alkaloids      | 1. 0.43          |

|     |                            |         |    |      |     |                               |        |    |      |     |                                  |         |    |      |     |                         |             |    |      |
|-----|----------------------------|---------|----|------|-----|-------------------------------|--------|----|------|-----|----------------------------------|---------|----|------|-----|-------------------------|-------------|----|------|
| 08  |                            | ols     | 07 | 486  | 03  | acid                          | lic    | 06 | 974  | 00  |                                  | lic     | 07 | 989  | 00  |                         | ds          | 05 | 785  |
| 14  |                            |         | 34 |      | 29  |                               | acids  | 96 |      | 47  |                                  | acids   | 45 |      | 41  |                         |             | 90 |      |
|     |                            |         | 8  |      |     |                               |        | 2  |      | 5   |                                  |         | 7  |      | 4   |                         |             | 0  |      |
| kz0 |                            |         | 1. |      | kz0 |                               |        | 1. |      |     |                                  |         | 1. |      | kz0 |                         |             | 1. |      |
| 00  |                            |         | 00 |      | 00  |                               | Pheno  | 06 |      | km  |                                  |         | 07 |      | 00  | 1'-O-β-D-(3,4-          | Pheno       | 07 |      |
| 30  |                            | Organi  | 28 | 3.60 | 49  | 3-(4-Hydroxyphenyl)-propionic | lic    | 49 | 8.32 | 08  |                                  | Vitami  | 84 | 5.71 | 07  | Dihydroxyphenethyl)-O-  | lic         | 04 | 0.45 |
| 2   | 2-Isopropylmalate          | c acids | 9  | 187  | 5   | acid                          | acids  | 0  | 085  | 79  | Orotic acid                      | ns      | 2  | 711  | 8   | caffeoyl-glucoside      | acids       | 7  | 399  |
| kz0 |                            |         | 1. |      | kz0 |                               |        | 1. |      | kz0 |                                  |         | 1. |      | kz0 |                         |             | 1. |      |
| 01  |                            |         | 06 |      | 04  |                               |        | 07 |      | 03  |                                  |         | 08 |      | 05  |                         |             | 09 |      |
| 28  |                            | Organi  | 25 | 3.61 | 73  | 4,7,9,9'-Tetrahydroxy-3,3'-   | Other  | 03 | 8.37 | 86  |                                  | Terpe   | 10 | 5.72 | 13  |                         | Terpe       | 16 | 0.45 |
| 5   | 2-Methylsuccinic acid      | c acids | 4  | 111  | 8   | dimethoxy-8-O-4'-neolignan    | s      | 8  | 738  | 3   | Sanguisorbigenin                 | noids   | 9  | 805  | 6   | Camaldulenic acid       | noids       | 7  | 862  |
| kz0 |                            |         | 1. |      | kz0 |                               |        | 1. |      | kz0 |                                  |         | 1. |      |     |                         |             | 1. |      |
| 01  |                            | Pheno   | 04 |      | 04  |                               |        | 07 |      | 01  |                                  |         | 07 |      | km  |                         |             | 00 |      |
| 07  |                            | lic     | 47 | 3.66 | 63  |                               | Terpe  | 10 | 8.49 | 28  |                                  | Organi  | 68 | 6.11 | 02  |                         | Isoflav     | 05 | 0.46 |
| 6   | Ethyl gallate              | acids   | 8  | 573  | 2   | isoceanothic acid             | noids  | 0  | 722  | 9   | Malic acid                       | c acids | 4  | 345  | 31  | 2'-Hydroxygenistein     | ones        | 0  | 076  |
| kz0 |                            |         | 1. |      | kz0 |                               |        | 1. |      | kz0 | 2-Hydroxy-5,8,11,14,17-          |         | 1. |      |     |                         |             | 1. |      |
| 01  |                            | Pheno   | 06 |      | 01  |                               | Pheno  | 06 |      | 04  | icosapentaenoyloxy]propyl-2-     |         | 08 |      | km  |                         |             | 08 |      |
| 63  |                            | lic     | 27 | 3.71 | 88  |                               | lic    | 86 | 8.50 | 76  | (trimethylammonio)ethyl          | Alkaloi | 17 | 6.16 | 00  | Quercetin               | 3-O- Flavon | 49 | 0.46 |
| 7   | Oresbiusin A               | acids   | 8  | 291  | 0   | feruloylsinapoyltartaric acid | acids  | 5  | 133  | 2   | phosphate                        | ds      | 4  | 751  | 71  | galactoside (Hyperin)   | ols         | 2  | 917  |
| kz0 |                            |         | 1. |      | kz0 |                               |        | 1. |      | kz0 |                                  |         | 1. |      | kz0 |                         |             | 1. |      |
| 00  |                            |         | 07 |      | 00  |                               |        | 06 |      | 00  |                                  |         | 08 |      | 00  |                         | Pheno       | 05 |      |
| 91  | 6-Hydroxykaempferol-7,6-O- | Flavon  | 24 | 3.75 | 91  | 6-Hydroxykaempferol-3,6-O-    | Flavon | 63 | 8.69 | 20  |                                  | Other   | 18 | 6.32 | 53  |                         | lic         | 96 | 0.46 |
| 5   | Diglucoside                | ols     | 7  | 566  | 4   | Diglucoside                   | ols    | 9  | 565  | 1   | D-galacitol                      | s       | 6  | 213  | 7   | 3-Galloylshikimic acid  | acids       | 3  | 976  |
| kz0 |                            |         | 1. |      | kz0 |                               |        | 1. |      | kz0 |                                  |         | 1. |      | kz0 |                         |             | 1. |      |
| 01  |                            |         | 06 |      | 01  |                               |        | 06 |      | 00  |                                  | Pheno   | 08 |      | 02  |                         |             | 02 |      |
| 31  |                            | Organi  | 34 | 3.77 | 74  |                               | Other  | 57 | 8.70 | 54  |                                  | lic     | 08 | 6.56 | 60  | Lariciresinol           | Other       | 26 | 0.48 |
| 5   | Anchoic Acid               | c acids | 2  | 658  | 2   | Methyl Brevifolincarboxylate  | s      | 0  | 990  | 8   | Trans-3-O-p-coumaric quinic acid | acids   | 0  | 784  | 7   | glucopyranoside         | s           | 1  | 104  |
| kz0 |                            |         | 1. |      | kz0 |                               |        | 1. |      | kz0 |                                  |         | 1. |      | kz0 |                         |             | 1. |      |
| 03  |                            |         | 06 |      | 02  |                               |        | 04 |      | 00  |                                  |         | 07 |      | 02  |                         |             | 08 |      |
| 26  |                            | Coum    | 07 | 3.82 | 66  |                               | Terpe  | 20 | 8.89 | 99  |                                  | Lignan  | 97 | 6.72 | 21  |                         | Flavon      | 68 | 0.48 |
| 2   | Ayapin                     | arins   | 8  | 615  | 5   | Betulinic acid                | noids  | 3  | 112  | 7   | Terpineol monO-glucoside         | s       | 1  | 781  | 4   | isohyperoside           | ols         | 1  | 127  |
| kz0 |                            |         | 1. |      | kz0 |                               |        | 1. |      | kz0 |                                  |         | 1. |      |     |                         |             | 1. |      |
| 02  |                            | Pheno   | 04 |      | 02  |                               | Pheno  | 05 |      | 01  |                                  |         | 08 |      | km  |                         |             | 08 |      |
| 55  |                            | lic     | 49 | 3.86 | 54  |                               | lic    | 26 | 9.12 | 19  |                                  | Alkaloi | 08 | 6.90 | 02  | Quercetin 3-O-glucoside | Flavon      | 54 | 0.48 |
| 4   | p-Hydroxycinnamic acid     | acids   | 9  | 165  | 9   | Vanillic acid glycoside       | acids  | 0  | 409  | 9   | Indole-3-carboxaldehyde          | ds      | 8  | 665  | 28  | (Isotrifoliin)          | ols         | 2  | 673  |
| kz0 |                            |         | 1. |      | kz0 |                               |        | 1. |      | kz0 |                                  |         | 1. |      | kz0 |                         |             | 1. |      |
| 00  |                            |         | 05 |      | 00  |                               |        | 07 |      | 03  |                                  | Pheno   | 06 |      | 04  |                         |             | 06 |      |
| 91  | 6-Hydroxykaempferol-3,6-O- | Flavon  | 53 | 3.94 | 43  |                               | Flavan | 11 | 9.27 | 71  |                                  | lic     | 59 | 6.94 | 69  | Taxifolin-3'-O-β-D-     | Flavon      | 32 | 0.48 |
| 4   | Diglucoside                | ols     | 2  | 798  | 1   | Eriodictyol 7-O-glucoside     | ones   | 8  | 738  | 8   | 2,3-Di-O-Galloyl-D-Glucose       | acids   | 9  | 275  | 7   | glucoside               | es          | 0  | 860  |
| kz0 |                            |         | 1. |      | kz0 |                               | Pheno  | 1. |      | kz0 |                                  |         | 1. |      | kz0 |                         |             | 1. |      |
| 03  |                            | Other   | 06 | 3.95 | 01  |                               | lic    | 06 | 9.34 | 03  | Quercetin-O-pentosyl-O-          | Flavon  | 04 | 6.99 | 00  | Hesperetin              | 5-O- Flavan | 08 | 0.48 |
| 15  | Ailantinol E               | s       | 54 | 314  | 07  | Methyl gallate                | acids  | 83 | 676  | 83  | rhamnoside-O-glucoside           | ols     | 76 | 027  | 44  | glucoside               | ols         | 98 | 869  |

|     |                                 |         |    |      |     |                                  |         |         |      |      |                               |                                |         |      |      |                         |                   |         |      |      |
|-----|---------------------------------|---------|----|------|-----|----------------------------------|---------|---------|------|------|-------------------------------|--------------------------------|---------|------|------|-------------------------|-------------------|---------|------|------|
| 1   |                                 |         | 9  |      | 5   |                                  |         | 9       |      | 3    |                               | 1                              |         | 1    |      | 9                       |                   |         |      |      |
| kz0 |                                 |         | 1. |      | kz0 |                                  |         | 1.      |      | kz0  |                               | 1.                             |         | kz0  |      | 1.                      |                   |         |      |      |
| 00  |                                 | Pheno   | 07 |      | 03  |                                  |         | 05      |      | 01   |                               | 07                             |         | 03   |      | 08                      |                   |         |      |      |
| 49  |                                 | lic     | 00 | 4.02 | 76  |                                  | Terpe   | 74      | 9.65 | 28   |                               | Organi                         | 90      | 7.25 | 57   |                         | Flavon            | 06      | 0.49 |      |
| 1   | p-Coumaric acid                 | acids   | 0  | 594  | 3   | Betulin                          |         | noids   | 1    | 690  | 1                             | Citraconic acid                | c acids | 1    | 770  | 2                       | Biondnoid I       | ols     | 5    | 158  |
| kz0 |                                 |         | 1. |      | kz0 |                                  |         | 1.      |      | kz0  |                               | 1.                             |         | kz0  |      | 1.                      |                   |         |      |      |
| 05  |                                 |         | 05 |      | 03  |                                  |         | 07      |      | 01   |                               | 06                             |         | 03   |      | 06                      |                   |         |      |      |
| 04  | Dihydrokaempferol-3-O-β-D-      | Flavan  | 58 | 4.04 | 03  | 3-O-(2-O-Acetyl-β-D-             |         | Terpe   | 07   | 9.84 | 10                            |                                | Alkaloi | 58   | 7.50 | 85                      |                   | Other   | 13   | 0.49 |
| 6   | glucoside                       | ols     | 9  | 815  | 8   | glucopyranosyl) oleanolic acid   |         | noids   | 3    | 000  | 3                             | 6-Hydroxynicotinic acid        | ds      | 0    | 983  | 4                       | Roseoside         | s       | 1    | 164  |
| kz0 |                                 |         | 1. |      | kz0 |                                  |         | 1.      |      | kz0  |                               | 1.                             |         | kz0  |      | 1.                      |                   |         |      |      |
| 00  |                                 |         | 07 |      | 03  |                                  |         | 07      |      | 00   |                               | Pheno                          | 07      |      | 00   |                         | 09                |         |      |      |
| 29  |                                 | Organi  | 14 | 4.07 | 86  |                                  | Terpe   | 13      | 9.91 | 49   | 3-(4-Hydroxyphenyl)-propionic | lic                            | 70      | 7.77 | 88   |                         | Flavon            | 04      | 0.49 |      |
| 0   | Aminomalonic acid               | c acids | 5  | 392  | 3   | Sanguisorbigenin                 |         | noids   | 6    | 435  | 5                             | acid                           | acids   | 0    | 154  | 9                       | Spiraeoside       | ols     | 9    | 960  |
| kz0 |                                 |         | 1. |      | kz0 |                                  |         | 1.      |      | kz0  |                               | 1.                             |         | kz0  |      | 1.                      |                   |         |      |      |
| 02  |                                 |         | 05 |      | 00  |                                  | Pheno   | 06      | 10.0 | 03   |                               | 08                             |         | 04   |      | 04                      |                   |         |      |      |
| 16  | Isoluteolin (Orobol)(5,7,3',4'- | Isoflav | 72 | 4.13 | 57  |                                  | lic     | 96      | 556  | 03   | 3-O-(2-O-Acetyl-β-D-          | Terpe                          | 09      | 8.01 | 17   | Kaempferol 3-O-β-D-     | Flavon            | 32      | 2.00 |      |
| 4   | tetrahydroxyisoflavone)         | ones    | 5  | 277  | 3   | p-Coumaroylferuloyltartaric acid |         | acids   | 2    | 2    | 8                             | glucopyranosyl) oleanolic acid | noids   | 4    | 000  | 1                       | neohesperidoside  | ols     | 8    | 888  |
| kz0 |                                 |         | 1. |      | kz0 |                                  |         | 1.      |      | kz0  |                               | 1.                             |         | kz0  |      | 1.                      |                   |         |      |      |
| 01  |                                 |         | 07 |      | 01  |                                  |         | 06      | 10.0 | 00   |                               | 07                             |         | 00   |      | 04                      |                   |         |      |      |
| 27  |                                 | Organi  | 33 | 4.17 | 28  |                                  | Organi  | 94      | 972  | 41   |                               | Terpe                          | 85      | 8.06 | 88   | Myricetin-3-O-          | Flavon            | 49      | 2.02 |      |
| 5   | Methylmalonic acid              | c acids | 2  | 352  | 9   | Malic acid                       |         | c acids | 8    | 4    | 0                             | Sweroside                      | noids   | 1    | 912  | 6                       | arabinoside       | ols     | 3    | 655  |
| kz0 |                                 |         | 1. |      | kz0 |                                  |         | 1.      |      | kz0  |                               | 1.                             |         | kz0  |      | 1.                      |                   |         |      |      |
| 01  |                                 |         | 07 |      | 04  |                                  |         | 07      | 10.1 | km   |                               | Pheno                          | 07      |      | 03   |                         | 08                |         |      |      |
| 27  |                                 | Organi  | 31 | 4.19 | 63  |                                  | Terpe   | 07      | 978  | 03   | 3-(4-Hydroxyphenyl)propionic  | lic                            | 98      | 8.42 | 76   |                         | Terpe             | 92      | 2.05 |      |
| 6   | Succinic acid                   | c acids | 9  | 207  | 6   | 2α-hydroxypyraacrenic acid       |         | noids   | 2    | 5    | 29                            | acid                           | acids   | 1    | 388  | 7                       | Obtusilin         | noids   | 4    | 052  |
| kz0 |                                 |         | 1. |      | kz0 |                                  |         | 1.      |      | kz0  |                               | 1.                             |         | kz0  |      | 1.                      |                   |         |      |      |
| 00  |                                 | Pheno   | 07 |      | 01  |                                  |         | 07      | 10.2 | 00   |                               | Pheno                          | 07      |      | 01   |                         | 08                |         |      |      |
| 04  |                                 | lic     | 04 | 4.23 | 10  |                                  | Alkaloi | 10      | 470  | 51   |                               | lic                            | 97      | 8.59 | 31   |                         | Organi            | 81      | 2.09 |      |
| 9   | 2-(Formylamino)benzoic acid     | acids   | 4  | 854  | 1   | Trigonelline                     |         | ds      | 4    | 6    | 5                             | Sinapinaldehyde                | acids   | 3    | 141  | 8                       | Quinic Acid       | c acids | 7    | 797  |
| kz0 |                                 |         | 1. |      | kz0 |                                  |         | 1.      |      | kz0  |                               | 1.                             |         | kz0  |      | 1.                      |                   |         |      |      |
| 00  |                                 | Pheno   | 07 |      | 00  |                                  |         | 06      | 10.3 | 01   |                               | 07                             |         | 07   |      | 04                      |                   | 09      |      |      |
| 51  |                                 | lic     | 22 | 4.32 | 41  |                                  | Chalco  | 55      | 593  | 74   |                               | Other                          | 56      | 9.49 | 63   |                         | Terpe             | 18      | 2.10 |      |
| 1   | Ferulic acid                    | acids   | 3  | 898  | 7   | Phloretin                        |         | nes     | 4    | 9    | 2                             | Methyl Brevifolincarboxylate   | s       | 9    | 791  | 2                       | isoceanothic acid | noids   | 3    | 699  |
| kz0 |                                 |         | 1. |      | kz0 |                                  |         | 1.      |      | kz0  |                               | 1.                             |         | kz0  |      | 1.                      |                   |         |      |      |
| 01  |                                 |         | 07 |      | 02  |                                  |         | 06      | 10.5 | 01   |                               | 08                             |         | 08   |      | 00                      |                   | 00      |      |      |
| 29  |                                 | Organi  | 34 | 4.39 | 22  |                                  | Lignan  | 94      | 003  | 10   |                               | Alkaloi                        | 15      | 352  | 92   | Quercetin-O-rutinoside- | Flavon            | 84      | 2.10 |      |
| 3   | 4-Guanidinobutyric acid         | c acids | 0  | 097  | 0   | Olivil-4'-O-β-D-glucoside        |         | s       | 2    | 8    | 1                             | Trigonelline                   | ds      | 5    | 9    | 0                       | hexose            | ols     | 6    | 884  |
| kz0 |                                 |         | 1. |      | kz0 |                                  |         | 1.      |      | kz0  |                               | 1.                             |         | kz0  |      | 1.                      |                   |         |      |      |
| 00  |                                 |         | 06 |      | 01  |                                  |         | 06      | 10.9 | 04   |                               | 04                             |         | 04   |      | 01                      | 5'-               | Pheno   | 07   |      |
| 86  |                                 | Flavon  | 80 | 4.41 | 09  |                                  | Alkaloi | 91      | 493  | 63   |                               | Terpe                          | 84      | 577  | 64   | Glucopyranosyloxyjasma  | lic               | 97      | 2.16 |      |
| 4   | Kaempferol                      | ols     | 8  | 896  | 7   | Betaine                          |         | ds      | 4    | 7    | 0                             | 2α-hydroxyursolic acid         | noids   | 1    | 3    | 2                       | nic acid          | acids   | 6    | 423  |
| kz0 | Isoferulic Acid                 | Pheno   | 1. | 4.53 | kz0 | Indole-3-carboxylic acid         |         | Alkaloi | 1.   | 12.3 | kz0                           | Isotamarixin                   | Flavon  | 1.   | 11.4 | kz0                     | Kaempferol-3-O-   | Flavon  | 1.   | 2.26 |

|     |                                  |                  |     |      |      |                                  |         |    |      |     |                               |          |       |      |     |                          |         |     |      |      |
|-----|----------------------------------|------------------|-----|------|------|----------------------------------|---------|----|------|-----|-------------------------------|----------|-------|------|-----|--------------------------|---------|-----|------|------|
| 00  |                                  | lic              | 07  | 964  | 01   |                                  | ds      | 06 | 581  | 01  |                               | ols      | 07    | 220  | 00  | robinobioside(Biorobin)  | ols     | 07  | 090  |      |
| 05  |                                  | acids            | 29  |      | 20   |                                  |         | 96 | 1    | 58  |                               |          | 62    | 2    | 90  |                          |         | 85  |      |      |
| 3   |                                  |                  | 1   |      | 3    |                                  |         | 4  |      | 6   |                               |          | 1     |      | 6   |                          |         | 4   |      |      |
| kz0 |                                  |                  | 1.  |      | kz0  |                                  |         | 1. |      | kz0 |                               |          | 1.    |      | kz0 |                          |         | 1.  |      |      |
| 01  |                                  |                  | 06  |      | 00   |                                  |         | 07 | 12.5 | 02  |                               |          | 06    | 11.4 | 00  |                          |         | 08  |      |      |
| 18  |                                  | Coum             | 73  | 4.60 | 42   |                                  | Flavan  | 13 | 076  | 66  |                               | Terpe    | 06    | 967  | 90  | Kaempferol-3-O-          | Flavon  | 70  | 2.39 |      |
| 4   | Skimmin                          | arins            | 5   | 051  | 4    | Eriodictyol                      | ones    | 8  | 9    | 5   | Betulinic acid                | noids    | 1     | 0    | 5   | rutinoside(Nicotiflorin) | ols     | 5   | 634  |      |
| kz0 |                                  |                  | 1.  |      | kz0  |                                  |         | 1. |      | kz0 |                               |          | 1.    |      | kz0 |                          |         | 1.  |      |      |
| 00  |                                  | Pheno            | 07  |      | 00   |                                  |         | 07 | 12.7 | 00  |                               | Pheno    | 08    | 11.5 | 00  |                          | Pheno   | 08  |      |      |
| 55  | Methyl                           | 6-O-galloyl-β-D- | lic | 18   | 4.66 | 99                               | Lignan  | 03 | 218  | 05  |                               | lic      | 14    | 371  | 05  |                          | lic     | 99  | 2.40 |      |
| 1   | glucopyranoside                  | acids            | 6   | 051  | 7    | Terpineol monO-glucoside         | s       | 5  | 9    | 5   | 3,4,5-Trimethoxycinnamic acid | acids    | 2     | 0    | 3   | Isoferulic Acid          | acids   | 5   | 177  |      |
| kz0 |                                  |                  | 1.  |      | kz0  |                                  |         | 1. |      |     |                               |          | 1.    |      | kz0 |                          |         | 1.  |      |      |
| 01  |                                  |                  | 07  |      | 00   |                                  | Pheno   | 06 | 12.8 | km  |                               |          | 08    | 11.5 | 00  |                          | Pheno   | 08  |      |      |
| 70  |                                  | Other            | 30  | 4.86 | 54   |                                  | lic     | 92 | 134  | 12  |                               | Flavan   | 04    | 765  | 51  |                          | lic     | 79  | 2.40 |      |
| 6   | Isololiolide                     | s                | 5   | 305  | 8    | Trans-3-O-p-coumaric quinic acid | acids   | 2  | 1    | 93  | Hesperetin O-malonylhexoside  | ones     | 7     | 8    | 1   | Ferulic acid             | acids   | 7   | 988  |      |
| kz0 |                                  |                  | 1.  |      | kz0  |                                  |         | 1. |      | kz0 |                               |          | 1.    |      | kz0 |                          |         | 1.  |      |      |
| 03  |                                  |                  | 04  |      | 02   |                                  |         | 07 | 12.9 | 02  |                               | Pheno    | 08    | 11.6 | 04  |                          | Pheno   | 03  |      |      |
| 72  |                                  | Terpe            | 67  | 4.91 | 67   |                                  | Flavon  | 11 | 835  | 06  | 4-α-L-Rhamnopyranosyl-ellagic | lic      | 05    | 517  | 59  |                          | lic     | 48  | 2.41 |      |
| 8   | Geniposide                       | noids            | 4   | 620  | 3    | Eriodictyol-O-glucoside          | es      | 9  | 4    | 5   | acid                          | acids    | 3     | 6    | 5   | Geraniin                 | acids   | 3   | 707  |      |
| kz0 |                                  |                  | 1.  |      | kz0  |                                  |         | 1. |      | kz0 |                               |          | 1.    |      | kz0 |                          |         | 1.  |      |      |
| 01  |                                  |                  | 06  |      | 03   |                                  |         | 07 | 12.9 | 01  |                               |          | 07    | 12.1 | 00  |                          | Pheno   | 03  |      |      |
| 08  |                                  | Terpe            | 63  | 5.10 | 54   | Dihydrokaempferol-7-O-           | Flavon  | 06 | 956  | 09  | Oleanolic acid                | 2-O-β-D- | Terpe | 98   | 428 | 06                       |         | lic | 41   | 2.47 |
| 4   | Ursolic acid                     | noids            | 4   | 456  | 0    | glucoside                        | ols     | 4  | 9    | 3   | glucopyranoside               | noids    | 9     | 6    | 4   | 1-O-Feruloyl quinic acid | acids   | 2   | 756  |      |
| kz0 |                                  |                  | 1.  |      | kz0  |                                  |         | 1. |      | kz0 |                               |          | 1.    |      | kz0 |                          |         | 1.  |      |      |
| 00  |                                  |                  | 02  |      | 01   |                                  |         | 07 | 13.0 | 01  |                               |          | 08    | 12.3 | 03  |                          | Pheno   | 04  |      |      |
| 19  | E-3,4,5'-Trihydroxy-3'-          | Other            | 91  | 5.13 | 29   |                                  | Organi  | 02 | 434  | 31  |                               | Organi   | 17    | 655  | 50  |                          | lic     | 49  | 2.50 |      |
| 7   | glucopyranosylstilbene           | s                | 4   | 043  | 2    | 4-Acetamidobutyric acid          | c acids | 6  | 8    | 9   | D-Galacturonic acid(Gal A)    | c acids  | 6     | 9    | 4   | Geraniinic acid C        | acids   | 5   | 161  |      |
| kz0 |                                  |                  | 1.  |      | kz0  |                                  |         | 1. |      | kz0 |                               |          | 1.    |      | kz0 |                          |         | 1.  |      |      |
| 05  |                                  |                  | 06  |      | 05   |                                  | Pheno   | 07 | 13.7 | 02  |                               |          | 06    | 13.7 | 01  |                          |         | 09  |      |      |
| 37  | 5'-methoxyisolariciresinol-9'-O- | Lignan           | 24  | 5.21 | 18   |                                  | lic     | 03 | 716  | 22  |                               | Lignan   | 61    | 489  | 70  |                          | Other   | 08  | 2.53 |      |
| 8   | β-D-glucopyranoside              | s                | 0   | 127  | 7    | Dunalianoside B                  | acids   | 6  | 3    | 1   | Eucommin A                    | s        | 2     | 6    | 6   | Isololiolide             | s       | 5   | 190  |      |
|     |                                  |                  | 1.  |      | kz0  |                                  |         | 1. |      | kz0 |                               |          | 1.    |      | kz0 |                          |         | 1.  |      |      |
| km  |                                  |                  | 06  |      | 00   |                                  |         | 06 | 14.9 | 01  |                               |          | 07    | 13.7 | 01  |                          |         | 06  |      |      |
| 02  |                                  | Flavon           | 45  | 5.59 | 30   |                                  | Organi  | 79 | 764  | 01  |                               | Other    | 16    | 719  | 11  |                          | Alkaloi | 72  | 2.54 |      |
| 35  | Apigenin                         | es               | 2   | 475  | 2    | 2-Isopropylmalate                | c acids | 9  | 6    | 4   | 1-Methylhistamine             | s        | 7     | 1    | 3   | Lumichrome               | ds      | 1   | 839  |      |
| kz0 |                                  |                  | 1.  |      | kz0  |                                  |         | 1. |      | kz0 |                               |          | 1.    |      | kz0 |                          |         | 1.  |      |      |
| 01  |                                  |                  | 06  |      | 03   |                                  |         | 06 | 15.2 | 03  |                               |          | 07    | 14.3 | 01  |                          |         | 08  |      |      |
| 74  |                                  | Other            | 44  | 6.40 | 86   |                                  | Terpe   | 84 | 112  | 76  |                               | Terpe    | 15    | 995  | 28  |                          | Organi  | 72  | 2.56 |      |
| 2   | Methyl Brevifolincarboxylate     | s                | 8   | 339  | 0    | Caffeoyl hawthorn acid           | noids   | 9  | 7    | 3   | Betulin                       | noids    | 4     | 7    | 1   | Citraconic acid          | c acids | 1   | 137  |      |
| kz0 |                                  | Pheno            | 1.  |      | kz0  |                                  |         | 1. | 16.5 | kz0 |                               |          | 1.    | 15.3 | kz0 |                          | Pheno   | 1.  |      |      |
| 00  |                                  | lic              | 07  | 6.48 | 00   |                                  | Flavan  | 06 | 162  | 01  |                               | Alkaloi  | 08    | 783  | 02  | 4-α-L-Rhamnopyranosyl-   | lic     | 08  | 2.59 |      |
| 47  | 4-Hydroxybenzoic acid            | acids            | 05  | 910  | 44   | Astilbin                         | ols     | 90 | 6    | 20  | Indole-3-carboxylic acid      | ds       | 04    | 8    | 06  | ellagic acid             | acids   | 61  | 539  |      |

|     |                               |          |         |         |     |                                  |         |         |     |                             |          |         |     |                         |         |         |
|-----|-------------------------------|----------|---------|---------|-----|----------------------------------|---------|---------|-----|-----------------------------|----------|---------|-----|-------------------------|---------|---------|
| 5   |                               |          | 0       |         | 0   |                                  | 7       |         | 3   |                             | 2        |         | 5   |                         | 1       |         |
|     |                               |          | 1.      |         | kz0 |                                  | 1.      |         | kz0 |                             | 1.       |         | kz0 |                         | 1.      |         |
| km  |                               |          | 06      |         | 01  |                                  | 07 17.3 |         | 05  |                             | 08 16.6  |         | 02  |                         | 08      |         |
| 00  | Genistein                     | (4',5,7- | Isoflav | 19 6.49 | 19  |                                  | Isoflav | 07 071  | 13  |                             | Terpe    | 10 332  | 99  |                         | Flavon  | 25 2.72 |
| 81  | Trihydroxyisoflavone)         |          | ones    | 1 981   | 3   | Prunetin                         | ones    | 1 7     | 6   | Camaldulenic acid           | noids    | 4 1     | 0   | Luteolin-7-O-rutinoside | es      | 5 000   |
| kz0 |                               |          | 1.      |         | kz0 |                                  | 1.      |         | kz0 |                             | 1.       |         | kz0 |                         | 1.      |         |
| 01  |                               |          | 06      |         | 00  |                                  | Pheno   | 06 17.3 | 01  |                             | 08 17.8  |         | 00  |                         | 08      |         |
| 97  | Kaempferol-3-O-(cinnamoyl)-   |          | Flavon  | 99 6.90 | 61  | 1,2,3,6-Tetra-O-Galloyl-D-       | lic     | 51 921  | 02  |                             | Other    | 02 781  | 86  |                         | Flavon  | 24 2.79 |
| 3   | sophoroside-7-O-glucose       |          | ols     | 3 681   | 3   | Glucose                          | acids   | 6 6     | 5   | D-Glucurono-6,3-lactone     | s        | 7 3     | 4   | Kaempferol              | ols     | 4 011   |
| kz0 |                               |          | 1.      |         | kz0 |                                  | 1.      |         | kz0 |                             | 1.       |         | kz0 |                         | 1.      |         |
| 01  |                               |          | 07      |         | 03  |                                  | 06 17.5 |         | 04  |                             | 08 17.9  |         | 03  |                         | 06      |         |
| 02  |                               |          | Other   | 08 7.05 | 76  |                                  | Terpe   | 57 850  | 63  |                             | Terpe    | 16 035  | 26  |                         | Coum    | 67 2.81 |
| 5   | D-Glucurono-6,3-lactone       |          | s       | 2 453   | 7   | Obtusilin                        | noids   | 2 7     | 2   | isoceanothic acid           | noids    | 5 3     | 2   | Ayapin                  | arins   | 0 421   |
| kz0 |                               |          | 1.      |         |     |                                  | 1.      |         | kz0 |                             | 1.       |         | kz0 |                         | 1.      |         |
| 03  |                               |          | Pheno   | 06      | km  |                                  | 07 17.6 |         | 01  |                             | 08 19.2  |         | 01  |                         | 07      |         |
| 36  |                               |          | lic     | 14 7.43 | 12  |                                  | Flavan  | 06 351  | 70  |                             | Other    | 04 395  | 31  |                         | Organi  | 58 2.82 |
| 2   | Tubuloside C                  |          | acids   | 9 855   | 93  | Hesperetin O-malonylhexoside     | ones    | 6 4     | 6   | Isololiolide                | s        | 1 4     | 5   | Anchoic Acid            | c acids | 2 670   |
|     |                               |          | 1.      |         |     |                                  | 1.      |         | kz0 |                             | 1.       |         | kz0 |                         | 1.      |         |
| km  |                               |          | 07      |         | km  |                                  | 07 18.7 |         | 03  |                             | 07 19.8  |         | 01  |                         | 00      |         |
| 12  |                               |          | Flavon  | 37 7.54 | 00  |                                  | Isoflav | 11 386  | 75  |                             | Flavon   | 93 535  | 31  |                         | Organi  | 56 2.99 |
| 69  | Di-O-methylquercetin          |          | ols     | 9 750   | 80  | Biochanin A                      | ones    | 8 0     | 5   | Quercetin-3-sambubioside    | ols      | 8 7     | 3   | SubericAcid             | c acids | 7 278   |
| kz0 |                               |          | 1.      |         | kz0 |                                  | 1.      |         | kz0 |                             | 1.       |         | kz0 |                         | 1.      |         |
| 05  | Hesperetin                    | 7-O-     | 07      |         | 02  |                                  | 05 19.5 |         | 04  | Quercetin                   | 3-O-β-D- | 08 21.8 | 00  | Kaempferol-3-O-         |         | 04      |
| 20  | neohesperidoside(Neohesperidi |          | Flavan  | 25 7.93 | 22  |                                  | Lignan  | 91 101  | 17  | xylopyranosyl(1→2)-β-D-     | Flavon   | 01 765  | 90  | glucoside-7-O-          | Flavon  | 84 3.21 |
| 0   | n)                            |          | ones    | 8 928   | 1   | Eucommin A                       | s       | 0 6     | 2   | galactopyranoside           | ols      | 9 1     | 7   | rhamnoside              | ols     | 4 356   |
| kz0 |                               |          | 1.      |         | kz0 |                                  | 1.      |         | kz0 |                             | 1.       |         | kz0 |                         | 1.      |         |
| 00  |                               |          | 07      |         | 01  |                                  | 06 19.9 |         | 00  |                             | Pheno    | 08 24.9 | km  |                         | 08      |         |
| 14  |                               |          | Isoflav | 38 8.51 | 08  |                                  | Terpe   | 98 256  | 50  |                             | lic      | 13 394  | 08  |                         | Vitami  | 42 3.26 |
| 5   | Formononetin                  |          | ones    | 9 113   | 4   | Ursolic acid                     | noids   | 8 3     | 0   | Riboprine                   | acids    | 5 7     | 79  | Orotic acid             | ns      | 5 001   |
| kz0 |                               |          | 1.      |         | kz0 |                                  | 1.      |         | kz0 |                             | 1.       |         | kz0 |                         | 1.      |         |
| 03  |                               |          | 06      |         | 03  |                                  | Pheno   | 06 22.1 | 00  |                             | 07 27.9  |         | 01  |                         | 09      |         |
| 76  |                               |          | Terpe   | 96 8.92 | 72  |                                  | lic     | 73 871  | 84  |                             | Flavon   | 87 250  | 09  | Oleanolic acid 2-O-β-D- | Terpe   | 09 3.31 |
| 3   | Betulin                       |          | noids   | 1 952   | 0   | Maplexin H                       | acids   | 9 8     | 1   | Luteolin-O-sinapoylhexoside | es       | 7 0     | 3   | glucopyranoside         | noids   | 6 379   |
| kz0 |                               |          | 1.      |         | kz0 |                                  | 1.      |         | kz0 |                             | 1.       |         | kz0 |                         | 1.      |         |
| 01  |                               |          | 07      |         | 01  |                                  | 07 23.4 |         | 00  |                             | Pheno    | 07 29.4 | 00  | N-                      |         | 07      |
| 31  |                               |          | Organi  | 30 9.51 | 02  |                                  | Other   | 03 058  | 54  |                             | lic      | 90 881  | 27  | sinapoylhydroxycoumari  | Coum    | 80 3.94 |
| 9   | D-Galacturonic acid(Gal A)    |          | c acids | 5 537   | 5   | D-Glucurono-6,3-lactone          | s       | 4 8     | 4   | 3-O-p-Coumaroyl quinic acid | acids    | 9 0     | 4   | n                       | arins   | 0 312   |
| kz0 |                               |          | 1.      |         | kz0 |                                  | 1.      |         | kz0 |                             | 1.       |         | kz0 |                         | 1.      |         |
| 00  |                               |          | Pheno   | 07 10.5 | 03  |                                  | 06 27.0 |         | 03  |                             | 07 36.0  |         | 01  | Esculin(6,7-            |         | 08      |
| 49  |                               |          | lic     | 31 905  | 82  | Kampferol 3-O-(6''-galloyl)-β-D- | Flavon  | 41 849  | 76  |                             | Terpe    | 85 586  | 18  | DihydroxyCoumarin-6-    | Coum    | 09 4.11 |
| 6   | Vanillic acid                 |          | acids   | 5 5     | 1   | galactopyranoside                | ols     | 1 3     | 7   | Obtusilin                   | noids    | 5 0     | 8   | glucoside)              | arins   | 4 639   |
| kz0 | 6-Hydroxy-7-methoxycoumarin   |          | Coum    | 1. 12.0 | kz0 | D-Galacturonic acid(Gal A)       | Organi  | 1. 28.2 | kz0 | Myricetin-O-rhamnoside      | Flavon   | 1. 38.4 | kz0 | 4-Hydroxybenzaldehyde   | Pheno   | 1. 4.25 |

|     |                               |         |    |      |     |                                |         |    |      |     |                                |         |    |      |     |                          |        |    |      |
|-----|-------------------------------|---------|----|------|-----|--------------------------------|---------|----|------|-----|--------------------------------|---------|----|------|-----|--------------------------|--------|----|------|
| 03  |                               | arins   | 07 | 510  | 01  |                                | c acids | 07 | 642  | 04  |                                | ols     | 08 | 117  | 00  |                          | lic    | 08 | 650  |
| 16  |                               |         | 32 | 5    | 31  |                                |         | 10 | 1    | 66  |                                |         | 12 | 6    | 46  |                          | acids  | 96 |      |
| 6   |                               |         | 9  |      | 9   |                                |         | 6  |      | 7   |                                |         | 3  |      | 6   |                          |        | 5  |      |
| kz0 |                               |         | 1. |      | kz0 |                                |         | 1. |      | kz0 |                                |         | 1. |      | kz0 |                          |        | 1. |      |
| 01  |                               |         | 07 | 12.7 | 05  |                                |         | 07 | 36.2 | 00  |                                |         | 08 | 40.1 | 01  |                          |        | 09 |      |
| 09  |                               | Terpe   | 37 | 462  | 13  |                                | Terpe   | 08 | 682  | 89  |                                | Flavon  | 16 | 842  | 09  |                          | Terpe  | 17 | 4.45 |
| 0   | Methoxyursolic acid           | noids   | 6  | 3    | 6   | Camaldulenic acid              | noids   | 8  | 5    | 0   | Quercetin-7-O-Glucoside        | ols     | 6  | 1    | 0   | Methoxyursolic acid      | noids  | 3  | 477  |
| kz0 |                               |         | 1. |      | kz0 |                                |         | 1. |      |     |                                |         | 1. |      | kz0 |                          |        | 1. |      |
| 03  |                               |         | 07 | 12.8 | 03  |                                | Pheno   | 06 | 38.9 | km  |                                |         | 08 | 42.5 | 00  |                          | Pheno  | 08 |      |
| 83  | Quercetin-O-pentosyl-O-       | Flavon  | 08 | 817  | 79  |                                | lic     | 87 | 830  | 09  | Quercetin 4'-O-glucoside       | Flavon  | 13 | 436  | 47  |                          | lic    | 80 | 4.89 |
| 3   | rhamnoside-O-glucoside        | ols     | 9  | 6    | 6   | 1'-O-vanilloyl-β-D-glucoside   | acids   | 6  | 5    | 34  | (Spiraeoside)                  | ols     | 8  | 4    | 9   | Cinnamic acid            | acids  | 4  | 950  |
| kz0 |                               |         | 1. |      | kz0 |                                |         | 1. |      | kz0 |                                |         | 1. |      | kz0 |                          |        | 1. |      |
| 01  |                               |         | 05 | 13.2 | 01  |                                | Pheno   | 07 | 39.1 | 05  |                                | Pheno   | 08 | 48.2 | 01  |                          |        | 09 |      |
| 58  |                               | Flavon  | 21 | 118  | 07  |                                | lic     | 06 | 035  | 03  |                                | lic     | 13 | 613  | 18  |                          | Coum   | 02 | 5.26 |
| 6   | Isotamarixin                  | ols     | 8  | 9    | 4   | Gallic acid                    | acids   | 5  | 9    | 7   | Caffeoylferuloylshikimic?acid  | acids   | 1  | 3    | 4   | Skimmin                  | arins  | 5  | 008  |
| kz0 |                               |         | 1. |      | kz0 |                                |         | 1. |      | kz0 |                                |         | 1. |      | kz0 |                          |        | 1. |      |
| 03  | Quercetin-3-O-(2-O-α-L-       |         | 06 | 13.2 | 00  |                                | Pheno   | 06 | 42.0 | 00  |                                |         | 08 | 64.1 | 02  |                          |        | 08 |      |
| 69  | rhamnopyranosyl)-β-D-         | Flavon  | 97 | 712  | 54  |                                | lic     | 94 | 833  | 11  |                                | Flavon  | 15 | 250  | 22  |                          | Other  | 55 | 5.67 |
| 3   | galactopyranoside             | ols     | 9  | 7    | 4   | 3-O-p-Coumaroyl quinic acid    | acids   | 8  | 3    | 8   | Sakuranetin                    | es      | 7  | 0    | 3   | Eucommia                 | s      | 7  | 883  |
| kz0 |                               |         | 1. |      | kz0 |                                |         | 1. |      | kz0 |                                |         | 1. |      | kz0 | Kaempferol-3-O-          |        | 1. |      |
| 00  |                               | Pheno   | 06 | 15.1 | 03  |                                | Pheno   | 06 | 42.7 | 02  |                                |         | 08 | 66.2 | 01  | (cinnamoyl)-             |        | 08 |      |
| 48  |                               | lic     | 71 | 375  | 71  |                                | lic     | 76 | 283  | 33  |                                | Flavon  | 10 | 500  | 97  | sophoroside-7-O-         | Flavon | 46 | 5.71 |
| 4   | Vanillin                      | acids   | 3  | 4    | 8   | 2,3-Di-O-Galloyl-D-Glucose     | acids   | 1  | 8    | 7   | Luteolin-7-O-β-D-gentiobioside | es      | 3  | 0    | 3   | glucose                  | ols    | 5  | 350  |
| kz0 |                               |         | 1. |      | kz0 |                                |         | 1. |      | kz0 |                                |         | 1. |      | kz0 |                          |        | 1. |      |
| 01  |                               |         | 06 | 18.3 | 01  |                                |         | 07 | 44.0 | 00  |                                |         | 08 | 88.7 | 00  |                          | Pheno  | 09 |      |
| 19  |                               | Alkaloi | 81 | 776  | 29  |                                | Organi  | 09 | 499  | 14  |                                | Isoflav | 15 | 910  | 51  |                          | lic    | 07 | 5.71 |
| 9   | Indole-3-carboxaldehyde       | ds      | 7  | 4    | 8   | L-(+)-Tartaric acid            | c acids | 6  | 4    | 5   | Formononetin                   | ones    | 8  | 3    | 5   | Sinapinaldehyde          | acids  | 3  | 429  |
| kz0 |                               |         | 1. |      | kz0 |                                |         | 1. |      | kz0 |                                |         | 1. |      | kz0 |                          |        | 1. |      |
| 01  |                               |         | 07 | 18.4 | 02  |                                |         | 07 | 44.4 | 03  |                                |         | 08 | 89.5 | 00  |                          | Pheno  | 08 |      |
| 20  |                               | Alkaloi | 30 | 740  | 97  |                                | Flavon  | 06 | 250  | 74  |                                | Terpe   | 11 | 250  | 05  | 3,4,5-                   | lic    | 93 | 6.13 |
| 3   | Indole-3-carboxylic acid      | ds      | 9  | 3    | 8   | Pratensein 7-O-glucopyranoside | es      | 4  | 0    | 8   | 7'-O-Sinapoyljasminoside L     | noids   | 8  | 0    | 5   | Trimethoxycinnamic acid  | acids  | 8  | 434  |
| kz0 |                               |         | 1. |      | kz0 |                                |         | 1. |      | kz0 |                                |         | 1. |      | kz0 |                          |        | 1. |      |
| 02  |                               | Pheno   | 07 | 19.5 | 02  |                                |         | 06 | 44.5 | 00  |                                | Antho   | 07 | 92.2 | 00  |                          |        | 09 |      |
| 06  | 4-α-L-Rhamnopyranosyl-ellagic | lic     | 31 | 731  | 66  |                                | Terpe   | 61 | 000  | 73  |                                | cyanin  | 88 | 000  | 89  |                          | Flavon | 15 | 6.71 |
| 5   | acid                          | acids   | 9  | 2    | 8   | Ovalifoliolides B              | noids   | 1  | 0    | 3   | Delphinidin-3,5-O-diglucoside  | s       | 5  | 0    | 0   | Quercetin-7-O-Glucoside  | ols    | 7  | 209  |
| kz0 |                               |         | 1. |      | kz0 |                                |         | 1. |      | kz0 |                                |         | 1. |      | kz0 |                          |        | 1. |      |
| 00  |                               | Pheno   | 06 | 22.7 | 01  |                                |         | 07 | 44.8 | 01  |                                |         | 08 | 98.4 | 04  |                          |        | 09 |      |
| 46  |                               | lic     | 86 | 743  | 09  |                                | Terpe   | 12 | 198  | 08  | 2,3-Dihydroxy 5(6),12(13)diene | Terpe   | 17 | 750  | 66  |                          | Flavon | 03 | 6.73 |
| 6   | 4-Hydroxybenzaldehyde         | acids   | 0  | 3    | 0   | Methoxyursolic acid            | noids   | 3  | 2    | 6   | ursolic acid                   | noids   | 7  | 0    | 7   | Myricetin-O-rhamnoside   | ols    | 5  | 891  |
| kz0 |                               |         | 1. | 25.5 | kz0 |                                |         | 1. | 45.1 | kz0 |                                | Pheno   | 1. | 107. | km  |                          |        | 1. |      |
| 01  | Quercetin-O-rutinoside-O-     | Flavon  | 07 | 243  | 00  |                                | Flavon  | 06 | 000  | 00  |                                | lic     | 07 | 675  | 09  | Quercetin 4'-O-glucoside | Flavon | 09 | 6.97 |
| 38  | rhamnoside                    | ols     | 06 | 4    | 84  | Luteolin-O-sinapoylhexoside    | es      | 83 | 0    | 05  | 3-O-p-Coumaroylshikimic acid   | acids   | 94 | 00   | 34  | (Spiraeoside)            | ols    | 08 | 751  |



|     |                                |        |         |     |                                |        |         |     |                                    |         |         |     |                                       |
|-----|--------------------------------|--------|---------|-----|--------------------------------|--------|---------|-----|------------------------------------|---------|---------|-----|---------------------------------------|
| 0   |                                |        | 1       | 1   |                                |        | 9       | 9   |                                    | 2       |         |     | 8                                     |
| kz0 |                                |        | 1.      | kz0 |                                |        | 1.      | kz0 |                                    | 1.      | kz0     |     | 1.                                    |
| 00  |                                | Pheno  | 06 29.0 | 01  |                                |        | 07 45.7 | 04  |                                    | 08 116. | 04      |     | 09                                    |
| 50  |                                | lic    | 82 967  | 97  | Kaempferol-3-O-(cinnamoyl)-    | Flavon | 05 250  | 26  |                                    | Coum    | 00 250  | 23  | Terpe 08 7.06                         |
| 7   | Syringic Aldehyde              | acids  | 2 7     | 3   | sophoroside-7-O-glucose        | ols    | 5 0     | 3   | Osthole                            | arins   | 0 00    | 3   | Terminolic acid noids 7 963           |
| kz0 |                                |        | 1.      | kz0 |                                |        | 1.      | kz0 |                                    |         | 1.      | kz0 | 1.                                    |
| 00  |                                |        | 07 31.7 | 00  |                                |        | 06 48.0 | 00  |                                    | Pheno   | 08 116. | 05  | 09                                    |
| 79  |                                | Flavon | 17 674  | 15  |                                | Flavan | 94 000  | 53  |                                    | lic     | 12 500  | 24  | Other 21 8.29                         |
| 8   | Luteolin-7-O-glucuronide       | es     | 6 4     | 6   | 7-O-Methylethiodictyol         | ols    | 2 0     | 7   | 3-Galloylshikimic acid             | acids   | 9 00    | 7   | Limonin s 4 162                       |
| kz0 |                                |        | 1.      | kz0 |                                |        | 1.      | kz0 |                                    |         | 1.      | kz0 | 1.                                    |
| 02  |                                |        | 07 32.2 | 03  |                                |        | 06 50.8 | 01  |                                    |         | 08 160. | 01  | 08 11.1                               |
| 93  |                                | Flavan | 36 000  | 72  |                                | Terpe  | 92 550  | 74  | Quercetin-3-O-(2'',3''-digalloyl)- | Flavon  | 13 250  | 01  | Other 75 623                          |
| 6   | Silibinin                      | ols    | 8 0     | 8   | Geniposide                     | noids  | 3 9     | 0   | β-D-glucopyranoside                | ols     | 7 00    | 4   | 1-Methylhistamine s 1 6               |
| kz0 |                                |        | 1.      | kz0 |                                |        | 1.      | kz0 |                                    |         | 1.      | kz0 | 1.                                    |
| 02  |                                |        | 07 33.3 | 04  |                                |        | 07 58.5 | 00  |                                    |         | 08 177. | 00  | Pheno 09 11.5                         |
| 97  | Scutellarin(Scutellarein-7-O-  | Flavon | 35 034  | 26  |                                | Coum   | 10 500  | 19  | E-3,4,5'-Trihydroxy-3'-            | Other   | 00 000  | 50  | lic 18 795                            |
| 6   | glucuronide)                   | es     | 6 8     | 3   | Osthole                        | arins  | 5 0     | 7   | glucopyranosylstilbene             | s       | 1 00    | 0   | Riboprine acids 4 4                   |
| kz0 |                                |        | 1.      | kz0 |                                |        | 1.      | kz0 |                                    |         | 1.      | kz0 | 1.                                    |
| 01  |                                |        | 07 36.8 | 00  |                                | Pheno  | 07 72.0 | 03  |                                    | Pheno   | 08 197. | 03  | 09 13.5                               |
| 70  |                                | Flavon | 15 866  | 05  | Ethyl 3,4-Dihydroxybenzoate    | lic    | 10 541  | 63  |                                    | lic     | 06 250  | 87  | Lup-12-en-15α,19β-diol- Terpe 08 318  |
| 2   | Kaempferol-3-O-β-D-glucuronide | ols    | 3 0     | 2   | (Ethyl protocatchuate)         | acids  | 6 8     | 4   | Sinapaldehyde Glucoside            | acids   | 3 00    | 2   | 3,11-dioxo-28-oic acid noids 3 4      |
| kz0 |                                |        | 1.      | kz0 |                                |        | 1.      | kz0 |                                    |         | 1.      | kz0 | 1.                                    |
| 05  |                                | Pheno  | 06 37.3 | 01  |                                |        | 06 78.2 | 01  |                                    |         | 08 199. | 03  | 08 14.7                               |
| 03  |                                | lic    | 48 268  | 19  |                                | Coum   | 95 500  | 09  |                                    | Terpe   | 18 662  | 75  | Quercetin-3- Flavon 98 661            |
| 7   | Caffeoylferuloylshikimic?acid  | acids  | 5 1     | 1   | 4-hydroxycoumarin di-glucoside | arins  | 5 0     | 0   | Methoxyursolic acid                | noids   | 1 16    | 5   | sambubioside ols 3 8                  |
| kz0 |                                |        | 1.      | kz0 |                                |        | 1.      | kz0 |                                    |         | 1.      | kz0 | 1.                                    |
| 00  |                                |        | 07 38.1 | 03  |                                |        | 07 84.8 | 01  |                                    |         | 07 260. | 03  | Quercetin-3-O-(2-O-α-L- 08 16.1       |
| 79  | Tetahydroxy-flavone-7-O-β-D-   | Flavon | 30 397  | 87  | Lup-12-en-15α,19β-diol-3,11-   | Terpe  | 07 000  | 30  |                                    | Organi  | 96 750  | 69  | rhamnopyranosyl)-β-D- Flavon 93 188   |
| 7   | glucuronide                    | es     | 9 7     | 2   | dioxo-28-oic acid              | noids  | 1 0     | 7   | Phthalic acid                      | c acids | 9 00    | 3   | galactopyranoside ols 5 5             |
| kz0 |                                |        | 1.      | kz0 |                                |        | 1.      | kz0 |                                    |         | 1.      | kz0 | 1.                                    |
| 04  |                                |        | 06 38.6 | 05  |                                |        | 06 117. | 01  |                                    |         | 08 261. | 01  | 08 20.1                               |
| 66  |                                | Flavon | 22 390  | 04  |                                | Coum   | 91 550  | 97  | Kaempferol-3-O-(cinnamoyl)-        | Flavon  | 17 250  | 38  | Quercetin-O-rutinoside- Flavon 89 122 |
| 7   | Myricetin-O-rhamnoside         | ols    | 8 5     | 3   | Scopoletin?Beta-D-Glucuronide  | arins  | 3 00    | 3   | sophoroside-7-O-glucose            | ols     | 6 00    | 0   | O-rhamnoside ols 2 5                  |
| kz0 |                                |        | 1.      | kz0 |                                |        | 1.      | kz0 |                                    |         | 1.      | kz0 | 1.                                    |
| 00  |                                | Pheno  | 07 44.9 | 00  |                                |        | 07 120. | 05  |                                    |         | 08 268. | 00  | 09 21.5                               |
| 51  |                                | lic    | 18 555  | 11  |                                | Flavon | 12 000  | 04  |                                    | Coum    | 12 000  | 14  | Isoflav 23 339                        |
| 5   | Sinapinaldehyde                | acids  | 3 7     | 8   | Sakuranetin                    | es     | 6 00    | 3   | Scopoletin?Beta-D-Glucuronide      | arins   | 5 00    | 5   | Formononetin ones 5 8                 |
| kz0 |                                |        | 1.      | kz0 |                                |        | 1.      | kz0 |                                    |         | 1.      | kz0 | 1.                                    |
| 00  |                                |        | 07 57.0 | 02  |                                |        | 07 120. | 02  |                                    |         | 08 291. | 05  | Pheno 08 25.9                         |
| 89  |                                | Flavon | 22 841  | 97  |                                | Flavon | 10 750  | 60  |                                    | Other   | 12 750  | 03  | Caffeoylferuloylshikimic? lic 98 784  |
| 0   | Quercetin-7-O-Glucoside        | ols    | 6 1     | 5   | Acacetin-7-O-glucuronide       | es     | 0 00    | 7   | Lariciresinol glucopyranoside      | s       | 1 00    | 7   | acid acids 2 5                        |
| km  | Quercetin 4'-O-glucoside       | Flavon | 1. 58.3 | kz0 | wogonoside                     | Flavon | 1. 131. | kz0 | Uncargenin D                       | Terpe   | 1. 357. | kz0 | 6-Hydroxy-7- Coum 1. 49.2             |

|     |                               |         |    |      |     |                                  |        |    |      |     |                                |         |    |      |     |                          |        |    |      |
|-----|-------------------------------|---------|----|------|-----|----------------------------------|--------|----|------|-----|--------------------------------|---------|----|------|-----|--------------------------|--------|----|------|
| 09  | (Spiraeoside)                 | ols     | 07 | 247  | 01  |                                  | es     | 07 | 750  | 03  |                                | noids   | 08 | 000  | 03  | methoxycoumarin          | arins  | 09 | 059  |
| 34  |                               |         | 25 | 9    | 69  |                                  |        | 11 | 00   | 76  |                                |         | 18 | 00   | 16  |                          |        | 24 | 6    |
|     |                               |         | 9  |      | 5   |                                  |        | 0  |      | 6   |                                |         | 0  |      | 6   |                          |        | 4  |      |
| kz0 |                               |         | 1. |      | kz0 |                                  |        | 1. |      | kz0 |                                |         | 1. |      | kz0 |                          |        | 1. |      |
| 00  |                               | Pheno   | 07 | 60.6 | 02  |                                  |        | 07 | 134. | 00  |                                |         | 08 | 389. | 04  |                          |        | 08 | 78.8 |
| 59  | β-D-Furanofructosyl-α-D-(6-   | lic     | 30 | 250  | 96  | Penduletin (5,4'-Dihydroxy-      | Flavon | 11 | 000  | 17  |                                | Other   | 16 | 500  | 42  | Luteolin-O-rutinoside-O- | Flavon | 81 | 750  |
| 6   | mustard acyl)glucoside        | acids   | 5  | 0    | 2   | 3,6,7-trimethoxyflavone)         | es     | 9  | 00   | 3   | 3-Hydroxypyridine              | s       | 3  | 00   | 5   | rhamnoside               | es     | 2  | 0    |
| kz0 |                               |         | 1. |      | kz0 |                                  |        | 1. |      | kz0 |                                |         | 1. |      | kz0 |                          |        | 1. |      |
| 04  |                               |         | 07 | 78.8 | 04  |                                  |        | 06 | 138. | 00  |                                | Pheno   | 08 | 397. | 00  |                          |        | 08 | 90.3 |
| 42  | Luteolin-O-rutinoside-O-      | Flavon  | 02 | 750  | 66  | 5,7,3',4',5'-                    | Flavan | 95 | 500  | 53  |                                | lic     | 16 | 750  | 91  | Robinin(Kaempferol-3-    | Flavon | 83 | 500  |
| 5   | rhamnoside                    | es      | 4  | 0    | 5   | pentahydroxydihydroflavone       | ones   | 1  | 00   | 6   | 5-Galloylshikimic acid         | acids   | 8  | 00   | 9   | O-gal-rham-7-O-rham)     | ols    | 0  | 0    |
| kz0 |                               |         | 1. |      | kz0 |                                  |        | 1. |      | kz0 |                                |         | 1. |      | kz0 |                          |        | 1. |      |
| 00  |                               |         | 06 | 90.3 | 04  |                                  |        | 06 | 148. | 02  |                                |         | 08 | 447. | 01  | 2,3-Dihydroxy            |        | 09 | 98.4 |
| 91  | Robinin(Kaempferol-3-O-gal-   | Flavon  | 96 | 500  | 63  |                                  | Terpe  | 25 | 483  | 19  | 2'-Hydoxy,5-methoxy Genistein- | Isoflav | 05 | 000  | 08  | 5(6),12(13)diene ursolic | Terpe  | 23 | 750  |
| 9   | rham-7-O-rham)                | ols     | 5  | 0    | 0   | 2α-hydroxyursolic acid           | noids  | 6  | 39   | 7   | 4',7-O-diglucoside             | ones    | 4  | 00   | 6   | acid                     | noids  | 0  | 0    |
| kz0 |                               |         | 1. |      | kz0 |                                  |        | 1. |      | kz0 |                                |         | 1. |      | kz0 |                          |        | 1. |      |
| 00  |                               | Pheno   | 07 | 91.0 | 03  |                                  |        | 06 | 152. | 00  |                                | Pheno   | 08 | 496. | 03  |                          | Pheno  | 09 | 197. |
| 50  |                               | lic     | 36 | 296  | 82  | Quercetin 3-O-(6''-galloyl)-β-D- | Flavon | 91 | 733  | 06  |                                | lic     | 16 | 750  | 63  |                          | lic    | 13 | 250  |
| 0   | Riboprine                     | acids   | 7  | 1    | 9   | galactopyranoside                | ols    | 9  | 42   | 4   | 1-O-Feruloyl quinic acid       | acids   | 3  | 00   | 4   | Sinapaldehyde Glucoside  | acids  | 9  | 00   |
| kz0 |                               |         | 1. |      | kz0 |                                  |        | 1. |      | kz0 |                                |         | 1. |      | kz0 |                          |        | 1. |      |
| 00  |                               | Antho   | 07 | 92.2 | 01  |                                  |        | 06 | 160. | 04  |                                | Pheno   | 08 | 502. | 01  |                          |        | 09 | 232. |
| 73  |                               | cyanin  | 08 | 000  | 73  | Quercetin-3-O-(2''-galloyl)-β-D- | Flavon | 41 | 000  | 59  |                                | lic     | 13 | 750  | 17  |                          | Coum   | 22 | 750  |
| 3   | Delphinidin-3,5-O-diglucoside | s       | 0  | 0    | 9   | glucoside                        | ols    | 8  | 00   | 5   | Geraniin                       | acids   | 7  | 00   | 7   | Scoparone                | arins  | 8  | 00   |
| kz0 |                               |         | 1. |      | kz0 |                                  |        | 1. |      | kz0 |                                |         | 1. |      | kz0 |                          |        | 1. |      |
| 04  | Quercetin 3-O-β-D-            |         | 06 | 116. | 00  |                                  | Antho  | 06 | 163. | 03  |                                | Pheno   | 08 | 582. | 03  | 3-Prenyl-4-O-β-D-        | Pheno  | 09 | 316. |
| 17  | xylopyranosyl(1→2)-β-D-       | Flavon  | 99 | 791  | 73  |                                  | cyanin | 99 | 500  | 50  |                                | lic     | 13 | 250  | 79  | glucopyranosyloxy-4-     | lic    | 09 | 750  |
| 2   | galactopyranoside             | ols     | 2  | 14   | 3   | Delphinidin-3,5-O-diglucoside    | s      | 8  | 00   | 4   | Geraniinic acid C              | acids   | 6  | 00   | 7   | hydroxyl-benzoic acid    | acids  | 8  | 00   |
| kz0 |                               |         | 1. |      | kz0 |                                  |        | 1. |      | kz0 |                                |         | 1. |      | kz0 |                          |        | 1. |      |
| 00  |                               |         | 07 | 125. | 03  |                                  | Pheno  | 06 | 174. | 01  |                                | Pheno   | 08 | 714. | 01  |                          | Pheno  | 09 | 733. |
| 27  |                               | Alkaloi | 35 | 750  | 10  |                                  | lic    | 74 | 500  | 07  |                                | lic     | 16 | 000  | 83  |                          | lic    | 23 | 000  |
| 8   | Indole 3-acetic acid (IAA)    | ds      | 3  | 00   | 6   | Cuspinin                         | acids  | 0  | 00   | 9   | Galloyl Methyl gallate         | acids   | 0  | 00   | 4   | feruloylmalic acid       | acids  | 6  | 00   |
| kz0 |                               |         | 1. |      | kz0 |                                  |        | 1. |      | kz0 |                                |         | 1. |      | kz0 |                          |        | 1. |      |
| 03  |                               |         | 07 | 160. | 00  |                                  | Pheno  | 07 | 179. | 01  |                                | Pheno   | 08 | 733. | 03  |                          |        | 09 | 934. |
| 75  |                               | Flavon  | 26 | 571  | 57  |                                  | lic    | 10 | 000  | 83  |                                | lic     | 18 | 000  | 83  | Quercetin-O-pentosyl-O-  | Flavon | 22 | 250  |
| 5   | Quercetin-3-sambubioside      | ols     | 4  | 23   | 5   | 3,5-Di-O-galloylshikimic acid    | acids  | 0  | 00   | 4   | feruloylmalic acid             | acids   | 0  | 00   | 3   | rhamnoside-O-glucoside   | ols    | 0  | 00   |
| kz0 |                               |         | 1. |      | kz0 |                                  |        | 1. |      | kz0 |                                |         | 1. |      | kz0 |                          |        | 1. |      |
| 00  |                               | Pheno   | 07 | 199. | 01  |                                  | Pheno  | 07 | 196. | 00  |                                |         | 08 | 858. | 00  |                          | Pheno  | 09 | 504  |
| 50  |                               | lic     | 17 | 250  | 07  |                                  | lic    | 06 | 644  | 88  |                                | Flavon  | 14 | 750  | 55  | Methyl 6-O-galloyl-β-D-  | lic    | 24 | 5.00 |
| 5   | Coniferyl alcohol             | acids   | 9  | 00   | 6   | Ethyl gallate                    | acids  | 7  | 74   | 6   | Myricetin-3-O-arabinoside      | ols     | 9  | 00   | 1   | glucopyranoside          | acids  | 5  | 000  |
| kz0 |                               |         | 1. | 224. | kz0 |                                  | Pheno  | 1. | 197. | kz0 |                                |         | 1. | 114  | kz0 | Quercetin 3-O-β-D-       |        | 1. | 113  |
| 00  |                               | Flavon  | 07 | 750  | 04  |                                  | lic    | 07 | 250  | 03  | Lup-12-en-15α,19β-diol-3,11-   | Terpe   | 08 | 7.50 | 04  | xylopyranosyl(1→2)-β-D-  | Flavon | 09 | 37.5 |
| 92  | Quercetin-O-rutinoside-hexose | ols     | 33 | 00   | 76  | monogalloyl-diglucose            | acids  | 11 | 00   | 87  | dioxo-28-oic acid              | noids   | 18 | 000  | 17  | galactopyranoside        | ols    | 24 | 000  |

|     |                               |         |      |      |     |                                    |        |      |      |     |                                 |                  |      |      |      |
|-----|-------------------------------|---------|------|------|-----|------------------------------------|--------|------|------|-----|---------------------------------|------------------|------|------|------|
| 0   |                               | 2       |      | 8    |     | 0                                  |        | 2    |      | 9   |                                 | 2                |      | 4    | 0    |
| kz0 |                               | 1.      |      | kz0  |     | 1.                                 |        |      |      | 1.  |                                 |                  |      |      |      |
| 01  |                               | 07      | 260. | 00   |     | Pheno                              | 07     | 200. | km   |     | Pheno                           | 08               | 118  |      |      |
| 30  |                               | 18      | 750  | 06   |     | lic                                | 00     | 500  | 13   |     | lic                             | 19               | 7.50 |      |      |
| 7   | Phthalic acid                 | c acids | 4    | 00   | 4   | 1-O-Feruloyl quinic acid           | acids  | 3    | 00   | 00  | Hydroxy-methoxycinnamate        | acids            | 0    | 000  |      |
| kz0 |                               | 1.      |      | kz0  |     |                                    |        | 1.   |      | kz0 |                                 | 1.               |      |      |      |
| 02  |                               | 07      | 264. | 02   |     |                                    |        | 07   | 200. | 03  |                                 | Pheno            | 08   | 139  |      |
| 91  |                               | 33      | 500  | 96   |     | Flavon                             | 13     | 500  | 10   |     | lic                             | 16               | 2.50 |      |      |
| 2   | Santamarin                    | noids   | 7    | 00   | 0   | Eupatilin                          | es     | 7    | 00   | 3   | Gemin D                         | acids            | 2    | 000  |      |
| kz0 |                               | 1.      |      | kz0  |     |                                    |        | 1.   |      | kz0 |                                 | 1.               |      |      |      |
| 03  | 3-Prenyl-4-O-β-D-             | Pheno   | 07   | 316. | 04  |                                    | Pheno  | 07   | 208. | 02  | Galloyl-                        | Pheno            | 08   | 163  |      |
| 79  | glucopyranosyloxy-4-hydroxyl- | lic     | 26   | 750  | 59  |                                    | lic    | 03   | 000  | 06  | HHDP(Hexahydroxydiphenoyl)-     | lic              | 17   | 0.00 |      |
| 7   | benzoic acid                  | acids   | 3    | 00   | 5   | Geraniin                           | acids  | 5    | 00   | 3   | glueopy ranose                  | acids            | 5    | 000  |      |
| kz0 |                               | 1.      |      | kz0  |     |                                    |        | 1.   |      | kz0 |                                 | 1.               |      |      |      |
| 00  |                               | Pheno   | 07   | 326. | 03  |                                    | Pheno  | 07   | 232. | 00  |                                 |                  | 08   | 193  |      |
| 05  |                               | lic     | 39   | 500  | 50  |                                    | lic    | 08   | 750  | 88  |                                 | Flavon           | 18   | 2.50 |      |
| 5   | 3,4,5-Trimethoxycinnamic acid | acids   | 6    | 00   | 4   | Geraniinic acid C                  | acids  | 4    | 00   | 1   | Avicularin                      | ols              | 0    | 000  |      |
| kz0 |                               | 1.      |      | kz0  |     |                                    |        | 1.   |      | kz0 |                                 | 1.               |      |      |      |
| 00  |                               | 07      | 389. | 00   |     |                                    | Pheno  | 07   | 248. | 02  |                                 |                  | 08   | 271  |      |
| 17  |                               | Other   | 36   | 500  | 53  |                                    | lic    | 13   | 000  | 21  | Quercetin                       | 3-O-β-D- Flavon  | 17   | 7.50 |      |
| 3   | 3-Hydroxypyridine             | s       | 9    | 00   | 7   | 3-Galloylshikimic acid             | acids  | 3    | 00   | 1   | xylopyranoside                  | ols              | 5    | 000  |      |
| kz0 |                               | 1.      |      | kz0  |     |                                    |        | 1.   |      | kz0 |                                 | 1.               |      |      |      |
| 02  |                               | 07      | 420. | 01   |     |                                    |        | 06   | 307. | 00  |                                 | Pheno            | 08   | 504  |      |
| 29  | Syringaresinol-4'-O-β-D-monO- | Lignan  | 31   | 250  | 74  | Quercetin-3-O-(2'',3''-digalloyl)- | Flavon | 93   | 250  | 55  | Methyl                          | 6-O-galloyl-β-D- | lic  | 19   | 5.00 |
| 5   | glucoside                     | s       | 0    | 00   | 0   | β-D-glucopyranoside                | ols    | 0    | 00   | 1   | glucopyranoside                 | acids            | 0    | 000  |      |
| kz0 |                               | 1.      |      | kz0  |     |                                    |        | 1.   |      | kz0 |                                 | 1.               |      |      |      |
| 00  |                               | Pheno   | 07   | 429. | 00  |                                    | Pheno  | 07   | 313. | 00  |                                 | Pheno            | 08   | 624  |      |
| 50  |                               | lic     | 35   | 500  | 55  | 4-O-Caffeoyl quinic acid           | lic    | 11   | 250  | 53  |                                 | lic              | 19   | 2.50 |      |
| 2   | Coniferaldehyde               | acids   | 8    | 00   | 2   | (criptochlorogenic acid)           | acids  | 4    | 00   | 2   | Protocatechuic acid-4-glucoside | acids            | 2    | 000  |      |
| kz0 |                               | 1.      |      | kz0  |     |                                    |        | 1.   |      |     |                                 |                  |      |      |      |
| 04  |                               | Pheno   | 07   | 502. | 01  |                                    |        | 07   | 331. |     |                                 |                  |      |      |      |
| 59  |                               | lic     | 34   | 750  | 58  |                                    | Flavon | 13   | 000  |     |                                 |                  |      |      |      |
| 5   | Geraniin                      | acids   | 9    | 00   | 4   | Quercetin-3',4'-dimethyl ether     | ols    | 4    | 00   |     |                                 |                  |      |      |      |
| kz0 |                               | 1.      |      | kz0  |     |                                    |        | 1.   |      |     |                                 |                  |      |      |      |
| 03  |                               | Pheno   | 07   | 582. | 01  |                                    |        | 07   | 353. |     |                                 |                  |      |      |      |
| 50  |                               | lic     | 34   | 250  | 68  | 6-hydroxy-5,7,4'-                  | Flavon | 14   | 750  |     |                                 |                  |      |      |      |
| 4   | Geraniinic acid C             | acids   | 8    | 00   | 0   | trimethoxyflavone                  | es     | 5    | 00   |     |                                 |                  |      |      |      |
| kz0 |                               | 1.      |      | kz0  |     |                                    |        | 1.   |      |     |                                 |                  |      |      |      |
| 01  |                               | Pheno   | 07   | 733. | 00  |                                    |        | 07   | 379. |     |                                 |                  |      |      |      |
| 83  |                               | lic     | 38   | 000  | 17  |                                    | Other  | 13   | 750  |     |                                 |                  |      |      |      |
| 4   | feruloylmalic acid            | acids   | 8    | 00   | 3   | 3-Hydroxypyridine                  | s      | 4    | 00   |     |                                 |                  |      |      |      |
| kz0 | Myricetin-3-O-arabinoside     | Flavon  | 1.   | 858. | kz0 | E-3,4,5'-Trihydroxy-3'-            | Other  | 1.   | 380. |     |                                 |                  |      |      |      |

|     |                                 |        |    |      |     |                                |         |    |      |
|-----|---------------------------------|--------|----|------|-----|--------------------------------|---------|----|------|
| 00  |                                 | ols    | 07 | 750  | 00  | glucopyranosylstilbene         | s       | 07 | 250  |
| 88  |                                 |        | 36 | 00   | 19  |                                |         | 10 | 00   |
| 6   |                                 |        | 0  |      | 7   |                                |         | 7  |      |
| kz0 |                                 |        | 1. |      | kz0 |                                |         | 1. |      |
| 00  |                                 | Pheno  | 07 | 127  | 03  |                                |         | 07 | 409. |
| 04  |                                 | lic    | 39 | 2.50 | 08  | 5,2'-Dihydroxy-7,8-            | Flavon  | 13 | 500  |
| 7   | Mandelic acid                   | acids  | 4  | 000  | 3   | dimethoxyflavone glycosides    | es      | 4  | 00   |
| kz0 |                                 |        | 1. |      | kz0 |                                |         | 1. |      |
| 00  | 1'-O-β-D-(3,4-                  | Pheno  | 07 | 130  | 00  |                                | Pheno   | 07 | 419. |
| 07  | Dihydroxyphenethyl)-O-caffeoyl- | lic    | 39 | 7.50 | 05  |                                | lic     | 13 | 000  |
| 8   | glucoside                       | acids  | 0  | 000  | 9   | 3-O-p-Coumaroylshikimic acid   | acids   | 3  | 00   |
| kz0 |                                 |        | 1. |      | kz0 |                                |         | 1. |      |
| 01  |                                 |        | 07 | 151  | 00  |                                |         | 07 | 423. |
| 01  |                                 | Other  | 39 | 2.50 | 88  |                                | Flavon  | 12 | 750  |
| 4   | 1-Methylhistamine               | s      | 8  | 000  | 6   | Myricetin-3-O-arabinoside      | ols     | 5  | 00   |
|     |                                 |        | 1. |      | kz0 |                                |         | 1. |      |
| km  |                                 | Pheno  | 07 | 539  | 01  |                                |         | 07 | 482. |
| 14  |                                 | lic    | 39 | 7.50 | 30  |                                | Organi  | 10 | 250  |
| 37  | p-Aminobenzoate                 | acids  | 6  | 000  | 7   | Phthalic acid                  | c acids | 0  | 00   |
|     |                                 |        | 1. | 217  | kz0 |                                |         | 1. |      |
| km  |                                 |        | 07 | 75.0 | 02  |                                |         | 07 | 606. |
| 09  |                                 | Flavon | 39 | 000  | 60  |                                | Other   | 09 | 500  |
| 36  | Quercetin 7-O-β-D-Glucuronide   | ols    | 8  | 0    | 7   | Lariciresinol glucopyranoside  | s       | 6  | 00   |
|     |                                 |        |    |      | kz0 |                                |         | 1. |      |
|     |                                 |        |    |      | 03  |                                | Pheno   | 07 | 745. |
|     |                                 |        |    |      | 10  |                                | lic     | 05 | 750  |
|     |                                 |        |    |      | 3   | Gemin D                        | acids   | 5  | 00   |
|     |                                 |        |    |      | kz0 |                                |         | 1. |      |
|     |                                 |        |    |      | 03  |                                | Pheno   | 06 | 797. |
|     |                                 |        |    |      | 71  | Maplexin D (2,4-Di-O-Galloyl-  | lic     | 94 | 000  |
|     |                                 |        |    |      | 6   | 1,5-Anhydro-D-Glucitol)        | acids   | 8  | 00   |
|     |                                 |        |    |      | kz0 |                                |         | 1. |      |
|     |                                 |        |    |      | 02  | Galloyl-                       | Pheno   | 06 | 800. |
|     |                                 |        |    |      | 06  | HHDP(Hexahydroxydiphenyl)-     | lic     | 89 | 500  |
|     |                                 |        |    |      | 3   | glueopy ranose                 | acids   | 0  | 00   |
|     |                                 |        |    |      | kz0 |                                |         | 1. |      |
|     |                                 |        |    |      | 02  |                                |         | 07 | 806. |
|     |                                 |        |    |      | 33  |                                | Flavon  | 09 | 250  |
|     |                                 |        |    |      | 7   | Luteolin-7-O-β-D-gentiobioside | es      | 6  | 00   |
|     |                                 |        |    |      | kz0 |                                |         | 1. | 866. |
|     |                                 |        |    |      | 05  | lyoniresinol-9'-O-β-D-         | Lignan  | 07 | 000  |
|     |                                 |        |    |      | 37  | xylopyranoside                 | s       | 14 | 00   |

|     |                                |         |    |      |
|-----|--------------------------------|---------|----|------|
| 7   |                                |         | 4  |      |
| kz0 |                                |         | 1. |      |
| 00  |                                |         | 07 | 950. |
| 20  |                                | Other   | 13 | 750  |
| 7   | Cannabiscitrin                 | s       | 7  | 00   |
| kz0 |                                |         | 1. |      |
| 00  |                                | Pheno   | 07 | 970. |
| 61  | 1,3,4,6-Tetra-O-Galloyl-D-     | lic     | 00 | 000  |
| 2   | Glucose                        | acids   | 8  | 00   |
| kz0 |                                |         | 1. |      |
| 00  |                                | Pheno   | 07 | 103  |
| 53  |                                | lic     | 14 | 1.50 |
| 6   | 5-Galloylshikimic acid         | acids   | 4  | 000  |
| kz0 |                                |         | 1. |      |
| 02  |                                |         | 07 | 104  |
| 19  | 2'-Hydoxy,5-methoxy Genistein- | Isoflav | 10 | 7.25 |
| 7   | 4',7-O-diglucoside             | ones    | 6  | 000  |
| kz0 |                                |         | 1. |      |
| 00  |                                |         | 07 | 106  |
| 03  |                                | Alkaloi | 14 | 0.50 |
| 2   | Caffeoylagmatine               | ds      | 7  | 000  |
| kz0 |                                |         | 1. |      |
| 00  |                                | Pheno   | 07 | 118  |
| 54  |                                | lic     | 14 | 2.50 |
| 6   | 1-O-p-Coumaroyl quinic acid    | acids   | 2  | 000  |
| kz0 |                                |         | 1. |      |
| 03  |                                | Pheno   | 07 | 119  |
| 71  | Maplexin C (2,3-Di-O-Galloyl-  | lic     | 07 | 7.50 |
| 7   | 1,5-Anhydro-D-Glucitol)        | acids   | 2  | 000  |
| km  |                                |         | 1. |      |
|     |                                | Pheno   | 07 | 123  |
| 13  |                                | lic     | 13 | 5.00 |
| 00  | Hydroxy-methoxycinnamate       | acids   | 4  | 000  |
| kz0 |                                |         | 1. |      |
| 00  |                                |         | 07 | 127  |
| 18  |                                | Other   | 14 | 0.00 |
| 6   | 2-Deoxyribose 1-phosphate      | s       | 4  | 000  |
| kz0 |                                |         | 1. |      |
| 01  |                                | Pheno   | 07 | 187  |
| 07  |                                | lic     | 13 | 5.00 |
| 9   | Galloyl Methyl gallate         | acids   | 1  | 000  |
| kz0 | Uncargenin D                   | Terpe   | 1. | 199  |

|  |     |                                 |                        |        |      |      |  |
|--|-----|---------------------------------|------------------------|--------|------|------|--|
|  | 03  |                                 | noids                  | 07     | 0.00 |      |  |
|  | 76  |                                 |                        | 13     | 000  |      |  |
|  | 6   |                                 |                        | 8      |      |      |  |
|  | kz0 |                                 |                        | 1.     |      |      |  |
|  | 03  |                                 |                        | 07     | 252  |      |  |
|  | 82  | Kampferol                       | 3-O-(2''-galloyl)-β-D- | Flavon | 14   | 5.00 |  |
|  | 3   | galactopyranoside               | ols                    | 4      | 000  |      |  |
|  | kz0 |                                 |                        | 1.     |      |      |  |
|  | 03  |                                 |                        | 07     | 431  |      |  |
|  | 74  |                                 | Terpe                  | 09     | 5.00 |      |  |
|  | 8   | 7'-O-Sinapoyljasminoside L      | noids                  | 9      | 000  |      |  |
|  | kz0 |                                 |                        | 1.     |      |      |  |
|  | 00  |                                 | Pheno                  | 07     | 531  |      |  |
|  | 53  |                                 | lic                    | 09     | 0.00 |      |  |
|  | 0   | Brevifolin carboxylic acid      | acids                  | 8      | 000  |      |  |
|  | kz0 |                                 |                        | 1.     | 112  |      |  |
|  | 00  |                                 | Pheno                  | 07     | 50.0 |      |  |
|  | 53  |                                 | lic                    | 14     | 000  |      |  |
|  | 2   | Protocatechuic acid-4-glucoside | acids                  | 0      | 0    |      |  |
|  | kz0 |                                 |                        | 1.     | 159  |      |  |
|  | 00  |                                 |                        | 07     | 25.0 |      |  |
|  | 88  |                                 | Flavon                 | 14     | 000  |      |  |
|  | 1   | Avicularin                      | ols                    | 6      | 0    |      |  |
|  | kz0 |                                 |                        | 1.     | 182  |      |  |
|  | 02  |                                 |                        | 07     | 25.0 |      |  |
|  | 21  | Quercetin                       | 3-O-β-D-               | Flavon | 14   | 000  |  |
|  | 1   | xylopyranoside                  | ols                    | 2      | 0    |      |  |

**Table S3.** The proportion of classified metabolites of five *Rosa* fruits respectively.

| Class          | RRT-F  | RSS-F  | RLM-F  | RDP-F  | RSL-F  |
|----------------|--------|--------|--------|--------|--------|
| Flavonoids     | 34.04% | 22.35% | 45.14% | 41.26% | 35.13% |
| Phenolic acids | 18.08% | 14.33% | 16.05% | 16.06% | 12.35% |
| Organic acids  | 16.17% | 15.95% | 14.59% | 13.32% | 16.33% |
| Terpenoids     | 11.38% | 22.62% | 7.57%  | 13.21% | 17.18% |
| Alkaloids      | 4.89%  | 9.37%  | 5.10%  | 3.96%  | 5.10%  |
| Lignans        | 4.06%  | 1.50%  | 1.29%  | 1.30%  | 0.59%  |
| Vitamins       | 0.82%  | 0.87%  | 0.99%  | 0.68%  | 0.79%  |
| Quinones       | 0.02%  | 0.01%  | 0.02%  | 0.03%  | 0.00%  |
| Coumarins      | 0.27%  | 0.26%  | 0.46%  | 0.13%  | 0.53%  |
| Others         | 9.43%  | 10.62% | 8.61%  | 7.04%  | 10.12% |



**Table S4.** List of relative content of differential metabolites (DEMs) among five *Rosa* fruits.

| Compounds                                 | Class          | RRT-F      |                            | RSS-F      |                            | RLM-F      |                            | RDP-F      |                            | RSL-F      |                            |
|-------------------------------------------|----------------|------------|----------------------------|------------|----------------------------|------------|----------------------------|------------|----------------------------|------------|----------------------------|
|                                           |                | mean value | Proportion of peak area(%) |
| Quercetin 3-O-galactoside (Hyperin)       | Flavonoids     | 7252500    | 1.6994±0.86<br>23          | 1880000    | 0.6004±0.30<br>25          | 2065000    | 0.5946±0.34<br>88          | 5190000    | 0.8572±0.21<br>6           | 2435000    | 0.5761±0.30<br>93          |
| Biochanin A                               | Flavonoids     | 1473       | 0.0003±0.00<br>06          | 4890       | 0.0016±0.00<br>1           | 1645       | 0.0005±0.00<br>01          | 30825      | 0.0051±0.00<br>09          | 1875       | 0.0004±0.00<br>07          |
| Genistein (4',5,7-Trihydroxyisoflavone)   | Flavonoids     | 15550      | 0.0036±0.00<br>24          | 6593       | 0.0021±0.00<br>37          | 17400      | 0.005±0.005<br>1           | 43825      | 0.0072±0.01<br>13          | 42850      | 0.0101±0.01<br>4           |
| Orobol (5,7,3',4'-tetrahydroxyisoflavone) | Flavonoids     | 47575      | 0.0111±0.03<br>35          | 54525      | 0.0175±0.04<br>05          | 95575      | 0.0275±0.04<br>42          | 297750     | 0.0491±0.11<br>17          | 158500     | 0.0375±0.08<br>84          |
| Quercetin 3-O-glucoside (Isotrifoliin)    | Flavonoids     | 6542500    | 1.534±0.542<br>5           | 1757500    | 0.561±0.392<br>6           | 1990000    | 0.5727±0.02<br>98          | 4802500    | 0.7927±0.29<br>45          | 2337500    | 0.5534±0.17<br>76          |
| 2'-Hydroxygenistein                       | Flavonoids     | 44175      | 0.0103±0.02<br>49          | 40625      | 0.013±0.040<br>9           | 85400      | 0.0246±0.08<br>17          | 269500     | 0.0446±0.06<br>98          | 124175     | 0.0295±0.07<br>49          |
| Apigenin                                  | Flavonoids     | 15125      | 0.0036±0.00<br>41          | 6663       | 0.0021±0.00<br>26          | 13950      | 0.004±0.004<br>8           | 39825      | 0.0066±0.00<br>67          | 37275      | 0.0088±0.01<br>27          |
| Chrysoeriol                               | Flavonoids     | 14975      | 0.0035±0.00<br>34          | 7948       | 0.0025±0.00<br>3           | 8305       | 0.0024±0.00<br>21          | 27000      | 0.0045±0.00<br>09          | 3990       | 0.0009±0.00<br>16          |
| (+)-cis,trans-Absciscic acid (ABA)        | Others         | 1340000    | 0.314±0.122<br>4           | 926250     | 0.2958±0.07<br>27          | 589000     | 0.1695±0.01<br>96          | 576500     | 0.0952±0.03<br>41          | 684750     | 0.1621±0.04<br>14          |
| 3-(4-Hydroxyphenyl)propionic acid         | Phenolic acids | 782000     | 0.1833±0.04<br>49          | 210750     | 0.0673±0.06<br>2           | 37275      | 0.0107±0.00<br>97          | 309000     | 0.051±0.022<br>8           | 314000     | 0.0743±0.04<br>35          |
| Afzelechin (3,5,7,4'-Tetrahydroxyflavan)  | Flavonoids     | 409500     | 0.0961±0.06<br>85          | 252500     | 0.0806±0.00<br>54          | 583750     | 0.1681±0.06<br>53          | 860750     | 0.1421±0.04<br>89          | 6808       | 0.0016±0.00<br>22          |
| Delphinidin 3-O-glucoside (Mirtillin)     | Flavonoids     | 1147750    | 0.2679±0.31<br>94          | 113050     | 0.0361±0.07<br>81          | 40975      | 0.0118±0.04<br>36          | 237500     | 0.0392±0.09<br>78          | 62700      | 0.0149±0.06<br>28          |
| Dihydroquercetin (Taxifolin)              | Flavonoids     | 354500     | 0.0831±0.03<br>59          | 104700     | 0.0335±0.03<br>89          | 876250     | 0.2522±0.05<br>98          | 943250     | 0.1558±0.05<br>86          | 46125      | 0.0109±0.01<br>32          |
| Epicatechin gallate (ECG)                 | Flavonoids     | 29600      | 0.0069±0.01<br>78          | 26400      | 0.0085±0.02<br>31          | 68300      | 0.0196±0.02<br>49          | 322250     | 0.0532±0.00<br>69          | 14025      | 0.0033±0.00<br>93          |
| Genistein 7-O-Glucoside (Genistin)        | Flavonoids     | 31950      | 0.0075±0.01<br>58          | 69250      | 0.0222±0.05<br>05          | 299750     | 0.0863±0.05<br>29          | 71575      | 0.0118±0.01<br>04          | 22650      | 0.0054±0.01<br>64          |
| Hesperetin 7-rutinoside (Hesperidin)      | Flavonoids     | 299500     | 0.0699±0.07<br>7           | 91250      | 0.0291±0.01<br>85          | -          | -                          | -          | -                          | -          | -                          |
| Kaempferol 3-O-galactoside (Trifolin)     | Flavonoids     | 7455000    | 1.7476±0.73<br>86          | 3147500    | 1.0051±0.39<br>98          | 6052500    | 1.7407±0.97<br>84          | 12025000   | 1.9852±0.61<br>44          | 8360000    | 1.9785±1.47<br>68          |
| Kaempferol 3-O-rhamnoside (Kaempferin)    | Flavonoids     | 155750     | 0.0366±0.02<br>94          | 63900      | 0.0204±0.01<br>95          | 45725      | 0.0132±0.01<br>13          | 46925      | 0.0078±0.00<br>31          | 40150      | 0.0095±0.01<br>02          |













|                                                   |                |         |             |         |             |         |             |         |             |         |             |
|---------------------------------------------------|----------------|---------|-------------|---------|-------------|---------|-------------|---------|-------------|---------|-------------|
| 3-Hydroxy-4-isopropylbenzylalcohol 3-glucoside    | Phenolic acids | 60375   | 0.0142±0.01 | 78925   | 0.0252±0.02 | 24900   | 0.0072±0.00 | 163000  | 0.0269±0.01 | 44325   | 0.0105±0.00 |
| 3,4,5-Trimethoxyphenyl-β-D-Glucopyranoside        | Phenolic acids | 1237500 | 0.2904±0.21 | 459500  | 0.1468±0.06 | 7410000 | 2.1325±0.52 | 2117500 | 0.3496±0.07 | 692500  | 0.1641±0.08 |
| 1-O-Galloyl-β-D-glucose                           | Phenolic acids | 1217500 | 0.285±0.145 | 1922500 | 0.614±0.054 | 3485000 | 1.0027±0.20 | 4240000 | 0.7±0.1678  | 2970000 | 0.7033±0.16 |
| 3-O-p-Coumaroyl quinic acid                       | Phenolic acids | 59200   | 0.0139±0.01 | 585000  | 0.1869±0.11 | 21000   | 0.0061±0.01 | 883750  | 0.1458±0.08 | 619250  | 0.1465±0.08 |
| 1-O-p-Coumaroyl quinic acid                       | Phenolic acids | 90375   | 0.0212±0.01 | 90500   | 0.0289±0.02 | -       | -           | 118250  | 0.0195±0.01 | -       | -           |
| Trans-3-O-p-coumaric quinic acid                  | Phenolic acids | 303500  | 0.0709±0.09 | 1960000 | 0.6267±0.81 | 77575   | 0.0223±0.00 | 994000  | 0.1644±0.22 | 509500  | 0.1207±0.09 |
| 1-O-[(E)-Caffeoyl]-β-D-glucopyranose              | Phenolic acids | 688250  | 0.1611±0.11 | 646250  | 0.2064±0.08 | 384750  | 0.1107±0.07 | 912500  | 0.1509±0.13 | 309500  | 0.0733±0.04 |
| Coniferin                                         | Phenolic acids | 717250  | 0.1683±0.14 | 667250  | 0.2132±0.12 | 395750  | 0.1139±0.04 | 913750  | 0.1509±0.04 | 328000  | 0.0777±0.03 |
| Methyl 6-O-galloyl-β-D-glucopyranoside            | Phenolic acids | -       | -           | 108250  | 0.0346±0.01 | -       | -           | -       | -           | 504500  | 0.1194±0.05 |
| 4-O-Caffeoyl quinic acid (criptochlorogenic acid) | Phenolic acids | 49575   | 0.0116±0.01 | 12923   | 0.0041±0.01 | -       | -           | 31325   | 0.0052±0.00 | -       | -           |
| Neochlorogenic acid(5-O-Caffeoylquinic acid)      | Phenolic acids | 206750  | 0.0484±0.05 | 84200   | 0.0269±0.03 | 15200   | 0.0044±0.00 | 104100  | 0.0172±0.01 | -       | -           |
| Chlorogenic acid                                  | Phenolic acids | 363000  | 0.0851±0.09 | 310500  | 0.0991±0.06 | 50850   | 0.0146±0.00 | 201750  | 0.0333±0.01 | 73125   | 0.0173±0.01 |
| 1-Caffeoylquinic acid                             | Phenolic acids | 165000  | 0.0386±0.02 | 64875   | 0.0207±0.00 | 59825   | 0.0172±0.03 | 78300   | 0.0129±0.01 | -       | -           |
| Glucosyringic Acid                                | Phenolic acids | 131250  | 0.0308±0.01 | 80300   | 0.0256±0.01 | 1002250 | 0.2885±0.10 | 280500  | 0.0463±0.01 | 47900   | 0.0113±0.01 |
| Trihydroxycinnamoylquinic acid                    | Phenolic acids | 365000  | 0.0854±0.05 | 404750  | 0.1293±0.09 | 322250  | 0.0927±0.03 | 1712500 | 0.2828±0.13 | 106850  | 0.0253±0.01 |
| Ditartaroyl-hydroxylcoumarin                      | Phenolic acids | 160250  | 0.0375±0.01 | 103800  | 0.0332±0.02 | 104650  | 0.0301±0.02 | 216750  | 0.0358±0.02 | 133500  | 0.0316±0.02 |
| p-Coumaroylferuloyltartaric acid                  | Phenolic acids | 149000  | 0.0349±0.00 | 35200   | 0.0113±0.01 | 22475   | 0.0065±0.00 | 226000  | 0.0373±0.00 | 52150   | 0.0123±0.00 |
| 3,5-Di-O-galloylshikimic acid                     | Phenolic acids | 24150   | 0.0057±0.01 | -       | -           | -       | -           | 17900   | 0.003±0.004 | -       | -           |
| Hexahydroxydiphenoylglucose                       | Phenolic acids | 8770000 | 2.0557±1.75 | 711750  | 0.2272±0.09 | 1927500 | 0.5546±0.14 | 850000  | 0.1403±0.01 | 883500  | 0.2091±0.05 |
| 1,6-Di-O-Galloyl-D-Glucose                        | Phenolic acids | -       | -           | 53025   | 0.0169±0.02 | 536250  | 0.1544±0.11 | 64100   | 0.0106±0.01 | 33000   | 0.0078±0.02 |
| 5-O-p-Coumaroyl quinic acid O-hexoside            | Phenolic acids | 12600   | 0.003±0.002 | 34425   | 0.011±0.003 | 11970   | 0.0035±0.00 | 87100   | 0.0144±0.01 | 4930    | 0.0012±0.00 |

|                                                   |                |         |             |         |             |         |             |          |             |         |             |
|---------------------------------------------------|----------------|---------|-------------|---------|-------------|---------|-------------|----------|-------------|---------|-------------|
| Rosmarinyl Glucoside                              | Phenolic acids | 37425   | 0.0088±0.02 | 53150   | 0.017±0.039 | 418750  | 0.1206±0.06 | 147000   | 0.0243±0.03 | -       | -           |
| β-D-Furanofructosyl-α-D-(6-mustard acyl)glucoside | Phenolic acids | 57475   | 0.0134±0.01 | -       | -           | 25725   | 0.0074±0.01 | 35475    | 0.0059±0.00 | 6063    | 0.0014±0.00 |
| 1,3,4,6-Tetra-O-Galloyl-D-Glucose                 | Phenolic acids | 35075   | 0.0082±0.01 | 31125   | 0.01±0.0178 | -       | -           | 97000    | 0.0159±0.04 | -       | -           |
| 1,2,3,6-Tetra-O-Galloyl-D-Glucose                 | Phenolic acids | 221750  | 0.0519±0.04 | 57675   | 0.0184±0.03 | 12750   | 0.0037±0.00 | 221750   | 0.0366±0.02 | 33325   | 0.0079±0.02 |
| Cyanidin-3-O-galactoside                          | Flavonoids     | 78525   | 0.0184±0.03 | 18275   | 0.0058±0.01 | 24575   | 0.0071±0.01 | 54125    | 0.009±0.017 | 56200   | 0.0133±0.01 |
| Cyanidin-3-O-glucoside (Kuromanin)                | Flavonoids     | 75425   | 0.0176±0.02 | 16150   | 0.0052±0.00 | 21025   | 0.006±0.018 | 33600    | 0.0056±0.01 | 51675   | 0.0123±0.02 |
| Delphinidin-3-O-glucoside (Mirtillin)             | Flavonoids     | 1307500 | 0.3053±0.41 | 176500  | 0.0564±0.04 | 87975   | 0.0252±0.09 | 341500   | 0.0563±0.18 | -       | -           |
| Cyanidin-O-syringic acid                          | Flavonoids     | 401750  | 0.0941±0.02 | 393750  | 0.1257±0.03 | 408750  | 0.1177±0.03 | 492500   | 0.0813±0.02 | -       | -           |
| Delphinidin-3,5-O-diglucoside                     | Flavonoids     | -       | 0.0027±0.00 | -       | -           | -       | -           | 16350    | 0.0027±0.00 | 9220    | 0.0022±0.00 |
| Diosmetin                                         | Flavonoids     | 26475   | 0.0062±0.00 | 15050   | 0.0048±0.00 | 19250   | 0.0055±0.00 | 50700    | 0.0084±0.00 | 8430    | 0.002±0.002 |
| Apigenin 7-O-glucoside(Cosmosiin)                 | Flavonoids     | 24475   | 0.0058±0.00 | 75550   | 0.0241±0.02 | 254500  | 0.0732±0.04 | 74750    | 0.0123±0.01 | 25600   | 0.0061±0.01 |
| Apigenin 5-O-glucoside                            | Flavonoids     | 41225   | 0.0097±0.01 | 99100   | 0.0317±0.01 | 399500  | 0.115±0.054 | 95350    | 0.0157±0.01 | 30700   | 0.0073±0.00 |
| Luteolin-7-O-glucoside(Cynaroside)                | Flavonoids     | 6285000 | 1.4714±2.04 | 2542500 | 0.8117±0.2  | 5360000 | 1.5431±1.32 | 10925000 | 1.8036±0.36 | 7795000 | 1.8452±0.35 |
| Tetahydroxy-flavone-7-O-β-D-glucuronide           | Flavonoids     | 57525   | 0.0134±0.01 | 24325   | 0.0078±0.00 | 3380000 | 0.9724±0.41 | 971250   | 0.1604±0.04 | 927750  | 0.2197±0.02 |
| Luteolin-7-O-glucuronide                          | Flavonoids     | 72400   | 0.0169±0.01 | 26875   | 0.0086±0.01 | 3127500 | 0.9004±0.33 | 965500   | 0.1594±0.03 | 853750  | 0.2022±0.09 |
| Chrysoeriol-5-O-hexoside                          | Flavonoids     | 2985000 | 0.7017±0.88 | 1145000 | 0.3656±0.16 | 1365000 | 0.3928±0.02 | 3000000  | 0.4954±0.19 | 2130000 | 0.5045±0.19 |
| Tricin O-saccharic acid                           | Flavonoids     | 627250  | 0.1469±0.07 | 210500  | 0.0673±0.05 | 390500  | 0.1124±0.03 | 1055000  | 0.1742±0.05 | 637250  | 0.151±0.139 |
| Chrysoeriol-7-O-rutinoside                        | Flavonoids     | 622000  | 0.1458±0.08 | 435250  | 0.1391±0.07 | 14975   | 0.0043±0.01 | 15675    | 0.0026±0.00 | 15175   | 0.0036±0.00 |
| Diosmin                                           | Flavonoids     | 1280000 | 0.2996±0.12 | 611000  | 0.0056±0.00 | 19450   | 0.0056±0.00 | 23225    | 0.0038±0.00 | 18200   | 0.0043±0.00 |
| Luteolin-O-sinapoylhexoside                       | Flavonoids     | 24425   | 0.0057±0.00 | 4120    | 0.0013±0.00 | -       | -           | 4510     | 0.0008±0.00 | 2793    | 0.0007±0.00 |
| Kaempferol                                        | Flavonoids     | 86550   | 0.0203±0.00 | 18200   | 0.0058±0.00 | 16725   | 0.0048±0.00 | 28825    | 0.0048±0.00 | 80425   | 0.0191±0.00 |

|                                           |            |          |             |         |             |         |             |          |             |         |             |
|-------------------------------------------|------------|----------|-------------|---------|-------------|---------|-------------|----------|-------------|---------|-------------|
| Quercetin                                 | Flavonoids | 179500   | 0.042±0.014 | 70050   | 0.0224±0.02 | 136250  | 0.0393±0.07 | 269250   | 0.0444±0.05 | 208000  | 0.0493±0.02 |
| Myricetin                                 | Flavonoids | -        | -           | -       | -           | 132500  | 0.0382±0.02 | 15300    | 0.0025±0.00 | -       | -           |
| Avicularin                                | Flavonoids | 1647500  | 0.3858±0.14 | 1397500 | 0.4461±0.20 | -       | -           | 1592500  | 0.2628±0.08 | 193250  | 0.0458±0.04 |
| Kaempferol-3-O-glucoside (Astragalin)     | Flavonoids | 9242500  | 2.1617±1.26 | 3555000 | 1.1356±0.56 | 5887500 | 1.6945±1.24 | 12050000 | 1.9898±1.07 | 8607500 | 2.0363±1.28 |
| Myricetin-3-O-arabinoside                 | Flavonoids | 16718    | 0.0039±0.01 | -       | -           | -       | -           | 42375    | 0.007±0.007 | 85875   | 0.0203±0.03 |
| Quercetin-3-O-β-D-Galactoside (Hyperin)   | Flavonoids | 2200000  | 0.5152±0.21 | 792750  | 0.2531±0.11 | 841500  | 0.2422±0.18 | 1997500  | 0.3298±0.07 | 1094750 | 0.259±0.111 |
| Spiraeoside                               | Flavonoids | 12450000 | 2.921±1.976 | 4995000 | 1.5948±0.47 | 5857500 | 1.6862±0.71 | 12450000 | 2.0562±0.39 | 6220000 | 1.4734±0.67 |
| Quercetin-7-O-Glucoside                   | Flavonoids | 235750   | 0.0553±0.07 | 133750  | 0.0427±0.08 | 190000  | 0.0547±0.02 | 1137500  | 0.1877±0.04 | 7635000 | 1.8075±0.62 |
| 6-Hydroxykaempferol-7-O-glucoside         | Flavonoids | 6770000  | 1.5855±0.42 | 1685000 | 0.538±0.233 | 1957500 | 0.5636±0.30 | 4647500  | 0.7667±0.41 | 2340000 | 0.5536±0.41 |
| Tiliroside                                | Flavonoids | 2932500  | 0.6866±0.44 | 3192500 | 1.0191±0.37 | 6352500 | 1.8279±0.58 | 18375000 | 3.0341±0.88 | 9890000 | 2.3417±0.36 |
| Kaempferol-3-O-rutinoside(Nicotiflorin)   | Flavonoids | 267000   | 0.0626±0.03 | 607000  | 0.194±0.151 | 7642500 | 2.1985±0.71 | 765750   | 0.1264±0.05 | 1835000 | 0.4345±0.14 |
| Kaempferol-3-O-robinobioside(Biorobin)    | Flavonoids | 244750   | 0.0574±0.04 | 556750  | 0.1779±0.11 | 7300000 | 2.1006±0.16 | 739750   | 0.1221±0.05 | 1672500 | 0.3958±0.30 |
| Kaempferol-3-O-glucoside-7-O-rhamnoside   | Flavonoids | 6215     | 0.0015±0.00 | 9968    | 0.0032±0.01 | 99900   | 0.0288±0.03 | 8628     | 0.0014±0.00 | 27725   | 0.0066±0.00 |
| Quercetin-3-O-robinobioside               | Flavonoids | 711000   | 0.1665±0.13 | 1605000 | 0.5125±0.19 | 5940000 | 1.7086±1.01 | 3340000  | 0.5514±0.23 | 2072500 | 0.4907±0.18 |
| Quercetin-3-O-rutinoside (Rutin)          | Flavonoids | 638250   | 0.1494±0.09 | 1352500 | 0.432±0.101 | 4890000 | 1.4065±0.56 | 2687500  | 0.4438±0.13 | 1512500 | 0.3578±0.17 |
| Quercetin-7-O-rutinoside                  | Flavonoids | 616500   | 0.1443±0.10 | 1152500 | 0.3683±0.35 | 3927500 | 1.1305±0.70 | 2340000  | 0.3868±0.26 | 1392500 | 0.3297±0.22 |
| Isorhamnetin-3-O-rutinoside (Narcissin)   | Flavonoids | 89175    | 0.0209±0.01 | 229000  | 0.0731±0.07 | 1037500 | 0.2987±0.11 | 282250   | 0.0466±0.03 | 91575   | 0.0217±0.00 |
| 6-Hydroxykaempferol-3,6-O-Diglucoside     | Flavonoids | 93925    | 0.022±0.018 | 17300   | 0.0055±0.01 | 97175   | 0.028±0.037 | 845000   | 0.1396±0.16 | 68300   | 0.0162±0.01 |
| 6-Hydroxykaempferol-7,6-O-Diglucoside     | Flavonoids | 376250   | 0.0881±0.03 | 44200   | 0.0141±0.00 | 115000  | 0.0331±0.02 | 393000   | 0.0649±0.03 | 166000  | 0.0393±0.02 |
| Robinin(Kaempferol-3-O-gal-rham-7-O-rham) | Flavonoids | -        | 0.0023±0.00 | -       | -           | 187750  | 0.054±0.021 | -        | -           | 9035    | 0.0021±0.00 |
| Quercetin-O-rutinoside-hexose             | Flavonoids | 9865     | 0.0023±0.00 | -       | -           | 9030    | 0.0026±0.00 | 10658    | 0.0018±0.00 | 22475   | 0.0053±0.00 |



|                                                                    |            |         |             |         |    |         |             |         |             |        |             |
|--------------------------------------------------------------------|------------|---------|-------------|---------|----|---------|-------------|---------|-------------|--------|-------------|
| 6-Hydroxykaempferol-3,6-O-Diglucoside-7-O-Glucuronic Acid          | Flavonoids | 45575   | 0.0106±0.02 | 16750   | 3  | 13343   | 0.0039±0.01 | 10963   | 0.0018±0.00 | 5435   | 0.0013±0.00 |
|                                                                    |            |         | 0.1057±0.09 |         |    |         | 0.0822±0.01 |         | 0.1539±0.11 |        | 0.0015±0.00 |
| Afzelechin(3,5,7,4'-Tetrahydroxyflavan)                            | Flavonoids | 450250  | 33          | 257500  | 66 | 659250  | 44          | 932750  | 25          | 6215   | 41          |
|                                                                    |            |         | 0.6927±0.48 |         |    |         | 1.5331±0.60 |         | 0.941±0.207 |        | 0.006±0.014 |
| Catechin                                                           | Flavonoids | 2952500 | 37          | 1390000 | 6  | 5330000 | 92          | 5697500 | 7           | 25375  | 2           |
|                                                                    |            |         | 0.0075±0.00 |         |    |         | 0.0332±0.01 |         | 0.036±0.022 |        |             |
| Epigallocatechin (EGC)                                             | Flavonoids | 32075   | 94          | 16450   | 84 | 115500  | 11          | 218000  | 3           | -      | -           |
|                                                                    |            |         | 0.0125±0.01 |         |    |         | 0.0517±0.02 |         | 0.0616±0.01 |        |             |
| Gallocatechin                                                      | Flavonoids | 53475   | 55          | 21925   | 7  | 179750  | 73          | 373000  | 17          | -      | -           |
|                                                                    |            |         | 0.5708±0.13 |         |    |         | 0.028±0.008 |         | 0.0734±0.04 |        | 0.0073±0.00 |
| Catechin-(7,8-bc)-4β-(3,4-dihydroxyphenyl)-dihydro-2-(3H)-pyranone | Flavonoids | 2437500 | 96          | 945750  | 2  | 97250   | 7           | 444250  | 87          | 31000  | 45          |
|                                                                    |            |         | 0.5539±0.10 |         |    |         |             |         | 0.0781±0.02 |        | 0.007±0.011 |
| Catechin-(7,8-bc)-4α-(3,4-dihydroxyphenyl)-dihydro-2-(3H)-pyranone | Flavonoids | 2365000 | 28          | 949750  | 03 | 102225  | 0.0294±0.01 | 472750  | 17          | 29500  | 1           |
|                                                                    |            |         | 0.1111±0.02 |         |    |         | 0.0179±0.01 |         | 0.0685±0.04 |        | 0.0349±0.01 |
| Pinoresinol                                                        | Lignans    | 474250  | 98          | 113250  | 42 | 62175   | 33          | 415000  | 37          | 147500 | 5           |
|                                                                    |            |         | 0.026±0.007 |         |    |         | 0.0268±0.00 |         | 0.0179±0.00 |        | 0.0067±0.00 |
| Syringaresinol                                                     | Lignans    | 111000  | 5           | 21625   | 34 | 93250   | 47          | 108250  | 38          | 28400  | 53          |
|                                                                    |            |         | 1.292±1.429 |         |    |         | 0.0365±0.03 |         | 0.2661±0.11 |        | 0.2019±0.07 |
| Terpineol monO-glucoside                                           | Lignans    | 5512500 | 8           | 2410000 | 93 | 126750  | 28          | 1612500 | 7           | 852750 | 89          |
|                                                                    |            |         |             |         |    |         | 0.0032±0.00 |         | 0.0022±0.00 |        | 0.0358±0.00 |
| 1-Methylhistamine                                                  | Others     | -       | -           | -       | -  | 10983   | 84          | 13550   | 46          | 151250 | 37          |
|                                                                    |            |         | 0.0026±0.00 |         |    |         | 0.003±0.007 |         | 0.0075±0.00 |        | 0.0045±0.00 |
| 3-Amino-1-propionic sulfonic acid                                  | Others     | 10905   | 4           | 9953    | 46 | 10388   | 4           | 45275   | 18          | 19050  | 74          |
|                                                                    |            |         | 0.1191±0.03 |         |    |         | 0.4317±0.10 |         | 0.033±0.013 |        | 0.0169±0.00 |
| 4-Methyl-5-thiazoleethanol                                         | Others     | 509000  | 9           | 438250  | 37 | 1500000 | 57          | 200000  | 3           | 71350  | 62          |
|                                                                    |            |         | 0.0156±0.01 |         |    |         | 0.0066±0.00 |         | 0.0888±0.01 |        | 0.0972±0.00 |
| D-Glucurono-6,3-lactone                                            | Others     | 66725   | 79          | 58225   | 09 | 22975   | 84          | 537750  | 75          | 410750 | 87          |
|                                                                    |            |         | 0.0334±0.02 |         |    |         | 0.0159±0.02 |         | 0.0316±0.02 |        | 0.0372±0.03 |
| N-Acetyl-D-galactosamine                                           | Others     | 142500  | 71          | 77475   | 95 | 55225   | 7           | 191750  | 2           | 157000 | 31          |
|                                                                    |            |         | 0.0199±0.00 |         |    |         | 0.0129±0.00 |         | 0.0324±0.01 |        | 0.0088±0.00 |
| N-Acetyl-D-glucosamine 1-phosphate                                 | Others     | 84825   | 38          | 84275   | 67 | 44650   | 75          | 195750  | 35          | 37200  | 46          |
|                                                                    | Phenolic   |         | 0.6542±0.97 |         |    |         | 0.0361±0.02 |         | 0.8095±0.39 |        | 0.0353±0.00 |
| Gallic acid                                                        | acids      | 2805000 | 86          | 197250  | 99 | 125500  | 99          | 4907500 | 94          | 149250 | 99          |
|                                                                    | Phenolic   |         | 0.0858±0.10 |         |    |         | 0.0161±0.01 |         | 0.0863±0.07 |        | 0.0317±0.02 |
| Methyl gallate                                                     | acids      | 365000  | 06          | 66950   | 14 | 55875   | 83          | 522250  | 61          | 134000 | 31          |
|                                                                    | Phenolic   |         | 0.1608±0.09 |         |    |         | 0.0109±0.01 |         | 1.2334±0.21 |        | 0.0232±0.01 |
| Ethyl gallate                                                      | acids      | 686000  | 58          | 26700   | 21 | 38000   | 66          | 7472500 | 24          | 97875  | 98          |
|                                                                    | Phenolic   |         | 0.0138±0.01 |         |    |         |             |         | 0.0309±0.02 |        | 0.0169±0.01 |
| Galloyl Methyl gallate                                             | acids      | 59125   | 22          | 56075   | 81 | -       | -           | 187500  | 88          | 71400  | 95          |
|                                                                    |            |         | 0.0161±0.03 |         |    |         | 0.0232±0.02 |         | 0.2655±0.17 |        | 0.0809±0.07 |
| Ursolic acid                                                       | Terpenoids | 68975   | 23          | 66950   | 49 | 80675   | 51          | 1607500 | 7           | 341750 | 51          |

|                                                      |            |          |             |          |             |         |             |          |             |          |             |
|------------------------------------------------------|------------|----------|-------------|----------|-------------|---------|-------------|----------|-------------|----------|-------------|
| 2,3-Dihydroxy 5(6),12(13)diene ursolic acid          | Terpenoids | 138750   | 0.0325±0.02 | 99325    | 0.0317±0.01 | -       | -           | -        | -           | 9848     | 0.0023±0.00 |
| Maslinic acid                                        | Terpenoids | 7292500  | 1.7074±1.03 | 11275000 | 3.6007±0.70 | 4662500 | 1.3416±0.32 | 11725000 | 1.9369±0.84 | 11700000 | 2.7708±0.89 |
| 3,24-Dihydroxy-17,21-semiacetal-12(13)oleanolic acid | Terpenoids | 7170000  | 1.6787±0.80 | 11075000 | 3.5365±0.80 | 4495000 | 1.2934±0.32 | 11600000 | 1.9151±0.70 | 11625000 | 2.7538±1.36 |
| 2-Hydroxyoleanolic acid                              | Terpenoids | 7250000  | 1.6977±0.65 | 10900000 | 3.481±0.316 | 4565000 | 1.3133±0.48 | 11600000 | 1.9157±0.69 | 11600000 | 2.7478±1.13 |
| Methoxyursolic acid                                  | Terpenoids | 179500   | 0.0421±0.03 | 347750   | 0.111±0.040 | 22200   | 0.0064±0.00 | 995000   | 0.1643±0.05 | 4432500  | 1.0495±0.28 |
| Euscaphic acid                                       | Terpenoids | 10900000 | 2.5557±0.96 | 15550000 | 4.9661±1.28 | 4010000 | 1.154±0.121 | 7530000  | 1.2434±0.10 | 10875000 | 2.5754±0.59 |
| Oleanolic acid 2-O-β-D-glucopyranoside               | Terpenoids | 24175    | 0.0057±0.00 | 34050    | 0.0109±0.00 | 4305    | 0.0012±0.00 | 15775    | 0.0026±0.00 | 52275    | 0.0124±0.00 |
| Choline                                              | Alkaloids  | 304250   | 0.0713±0.02 | 118750   | 0.0379±0.02 | 293750  | 0.0846±0.03 | 378500   | 0.0625±0.03 | 352750   | 0.0835±0.02 |
| Betaine                                              | Alkaloids  | 114500   | 0.0268±0.00 | 47925    | 0.0153±0.00 | 15800   | 0.0046±0.00 | 173000   | 0.0286±0.01 | 64650    | 0.0153±0.00 |
| Nicotinic Acid Methyl Ester(Methyl Nicotinate)       | Alkaloids  | 341000   | 0.0798±0.06 | 205500   | 0.0657±0.05 | 260250  | 0.0749±0.01 | 187750   | 0.031±0.007 | 29975    | 0.0071±0.00 |
| Trigonelline                                         | Alkaloids  | 2645000  | 0.6195±0.20 | 4447500  | 1.4208±0.73 | 637500  | 0.1835±0.05 | 6532500  | 1.0788±0.33 | 7162500  | 1.6961±0.62 |
| 6-Hydroxynicotinic acid                              | Alkaloids  | 10685    | 0.0025±0.00 | 31550    | 0.0101±0.01 | 10170   | 0.0029±0.00 | 77225    | 0.0127±0.00 | 76375    | 0.0181±0.01 |
| Acetylcholine                                        | Alkaloids  | 173000   | 0.0404±0.04 | 130750   | 0.0417±0.04 | 154750  | 0.0446±0.01 | 464250   | 0.0766±0.03 | 299250   | 0.0709±0.02 |
| Lumichrome                                           | Alkaloids  | 4158     | 0.001±0.002 | 13825    | 0.0044±0.00 | 45975   | 0.0132±0.00 | 13950    | 0.0023±0.00 | 35550    | 0.0084±0.01 |
| Nicotinamide                                         | Vitamins   | 907000   | 0.2125±0.01 | 680250   | 0.2172±0.05 | 179000  | 0.0515±0.01 | 411750   | 0.068±0.009 | 349250   | 0.0826±0.04 |
| Nicotinic acid                                       | Vitamins   | 1023000  | 0.2396±0.06 | 474750   | 0.1516±0.06 | 915750  | 0.2636±0.07 | 550500   | 0.0909±0.00 | 471750   | 0.1116±0.06 |
| Pyridoxine                                           | Vitamins   | 112750   | 0.0264±0.00 | 41850    | 0.0134±0.00 | 24100   | 0.0069±0.00 | 51750    | 0.0085±0.00 | 56475    | 0.0134±0.00 |
| 4-Pyridoxic acid                                     | Vitamins   | 16900    | 0.004±0.005 | 12475    | 0.004±0.003 | 9175    | 0.0026±0.00 | 24400    | 0.004±0.003 | 29575    | 0.007±0.001 |
| D-Pantothenic Acid                                   | Vitamins   | 77900    | 0.0182±0.01 | 47725    | 0.0153±0.01 | 501000  | 0.1441±0.05 | 593000   | 0.0979±0.03 | 88950    | 0.021±0.068 |
| Riboflavin                                           | Vitamins   | 250500   | 0.0587±0.03 | 318500   | 0.1018±0.05 | 996750  | 0.287±0.154 | 208000   | 0.0344±0.02 | 333000   | 0.0788±0.07 |
| Esculetin                                            | Coumarins  | 185750   | 0.0435±0.01 | 47875    | 0.0153±0.02 | 48800   | 0.0141±0.02 | 143000   | 0.0236±0.02 | 83125    | 0.0197±0.02 |

|                                            |               |          |             |         |             |         |             |         |             |         |             |
|--------------------------------------------|---------------|----------|-------------|---------|-------------|---------|-------------|---------|-------------|---------|-------------|
| Scoparone                                  | Coumarins     | 145750   | 88          | 72475   | 52          | 20150   | 99          | -       | -           | 23275   | 56          |
|                                            |               |          | 0.0342±0.01 |         | 0.0232±0.01 |         | 0.0058±0.00 |         |             |         | 0.0055±0.00 |
| Skimmin                                    | Coumarins     | 298500   | 55          | 87925   | 9           | 83975   | 4           | 76900   | 96          | 404500  | 18          |
|                                            |               |          | 0.0699±0.02 |         | 0.028±0.037 |         | 0.0242±0.02 |         | 0.0127±0.00 |         | 0.0959±0.06 |
| Esculin(6,7-DihydroxyCoumarin-6-glucoside) | Coumarins     | 49050    | 16          | 63225   | 35          | 118000  | 4           | 46825   | 03          | 192750  | 25          |
|                                            |               |          | 0.0116±0.03 |         | 0.0202±0.03 |         | 0.034±0.020 |         | 0.0077±0.01 |         | 0.0456±0.03 |
| 4-hydroxycoumarin di-glucoside             | Coumarins     | 210250   | 39          | 108500  | 35          | -       | -           | 7825    | 23          | -       | -           |
|                                            |               |          | 0.0493±0.02 |         | 0.0347±0.02 |         |             |         | 0.0013±0.00 |         |             |
| Prunetin                                   | Flavonoids    | 1385     | 03          | 5110    | 07          | 1848    | 05          | 31975   | 15          | 2050    | 09          |
|                                            |               |          | 0.0003±0.00 |         | 0.0016±0.00 |         | 0.0005±0.00 |         | 0.0053±0.00 |         | 0.0005±0.00 |
| Indole-3-carboxaldehyde                    | Alkaloids     | 33800    | 93          | 27275   | 05          | 72575   | 84          | 513500  | 45          | 501250  | 62          |
|                                            |               |          | 0.0079±0.00 |         | 0.0087±0.02 |         | 0.0209±0.00 |         | 0.0848±0.02 |         | 0.1187±0.07 |
| Indole-3-carboxylic acid                   | Alkaloids     | 32525    | 56          | 30800   | 91          | 37000   | 33          | 457250  | 82          | 569000  | 46          |
|                                            |               |          | 0.0076±0.00 |         | 0.0098±0.00 |         | 0.0107±0.01 |         | 0.0755±0.02 |         | 0.1347±0.03 |
| γ-Aminobutyric acid                        | Organic acids | 11620    | 24          | 64275   | 37          | 9300    | 28          | 15250   | 2           | 11640   | 79          |
|                                            |               |          | 0.0027±0.00 |         | 0.0205±0.01 |         | 0.0027±0.00 |         | 0.0025±0.00 |         | 0.0028±0.00 |
| 2-Furanoic acid                            | Organic acids | 1130000  | 43          | 968500  | 27          | 359250  | 4           | 1011750 | 6           | 1029000 | 09          |
|                                            |               |          | 0.2649±0.15 |         | 0.3093±0.12 |         | 0.1034±0.05 |         | 0.167±0.042 |         | 0.2436±0.06 |
| Methylmalonic acid                         | Organic acids | 2610000  | 25          | 1642500 | 74          | 2717500 | 0.782±0.119 | 5390000 | 0.89±0.1095 | 6855000 | 46          |
|                                            |               |          | 0.6114±0.18 |         | 0.5247±0.15 |         |             |         |             |         | 1.6228±0.40 |
| Succinic acid                              | Organic acids | 2485000  | 18          | 1640000 | 53          | 2820000 | 0.8119±0.3  | 5500000 | 0.9081±0.06 | 6875000 | 5           |
|                                            |               |          | 0.5823±0.40 |         | 0.5238±0.12 |         |             |         |             |         | 1.6277±0.58 |
| L-Homoserine                               | Organic acids | 260500   | 2           | 361750  | 35          | 98775   | 0.0285±0.02 | 329500  | 0.0544±0.02 | 308000  | 24          |
|                                            |               |          | 0.061±0.030 |         | 0.1156±0.05 |         | 0.1261±0.12 |         | 0.2054±0.13 |         | 0.0725±0.36 |
| Citraconic acid                            | Organic acids | 14450000 | 65          | 4045000 | 19          | 438500  | 0.0776±0.06 | 1242500 | 0.1153±0.03 | 3182500 | 35          |
|                                            |               |          | 3.3837±0.80 |         | 1.2919±0.11 |         | 0.0089±0.00 |         | 0.1538±0.10 |         | 0.0265±0.09 |
| 6-Aminocaproic acid                        | Organic acids | 33600    | 57          | 94700   | 2           | 31050   | 0.0107±0.02 | 122500  | 0.0062±0.00 | 112425  | 39          |
|                                            |               |          | 0.0079±0.00 |         | 0.0303±0.01 |         | 0.0107±0.02 |         | 0.0062±0.00 |         | 0.0142±0.00 |
| Oxaloacetic acid                           | Organic acids | -        | -           | 21475   | 12          | 37275   | 0.0776±0.06 | 37400   | 0.1153±0.03 | 60150   | 51          |
|                                            |               |          | 0.1398±0.05 |         | 0.0576±0.07 |         | 0.0776±0.06 |         | 0.1153±0.03 |         | 0.1538±0.10 |
| 2-Methylsuccinic acid                      | Organic acids | 597250   | 17          | 180000  | 88          | 269500  | 0.021±0.032 | 698250  | 0.0851±0.04 | 650000  | 41          |
|                                            |               |          | 0.0702±0.02 |         |             |         | 0.021±0.032 |         | 0.0851±0.04 |         | 0.0639±0.07 |
| (S)-(-)-2-Hydroxyisocaproic acid           | Organic acids | 299500   | 39          | 604500  | 0.193±0.084 | 72925   | 0.0444±0.04 | 515500  | 0.2571±0.03 | 270000  | 12          |
|                                            |               |          | 0.1815±0.27 |         | 0.1544±0.14 |         | 0.0444±0.04 |         | 0.2571±0.03 |         | 0.2231±0.17 |
| Malic acid                                 | Organic acids | 777750   | 65          | 483750  | 33          | 154250  | 0.028±0.028 | 1557500 | 0.2092±0.06 | 943000  | 84          |
|                                            |               |          | 0.054±0.035 |         | 0.0454±0.01 |         | 0.028±0.028 |         | 0.2092±0.06 |         | 0.0481±0.05 |
| 4-Acetamidobutyric acid                    | Organic acids | 230750   | 5           | 142000  | 57          | 97175   | 0.4915±0.19 | 1267500 | 0.8459±0.19 | 203000  | 57          |
|                                            |               |          | 0.3099±0.25 |         | 0.1874±0.06 |         | 0.4915±0.19 |         | 0.8459±0.19 |         | 0.6102±0.01 |
| 4-Guanidinobutyric acid                    | Organic acids | 1322500  | 31          | 587000  | 16          | 1707500 | 0.1207±0.16 | 5125000 | 0.178±0.060 | 2577500 | 8           |
|                                            |               |          | 2.7695±0.74 |         | 1.4036±0.19 |         | 0.1207±0.16 |         | 0.178±0.060 |         | 0.4748±0.14 |
| (Rs)-Mevalonic acid                        | Organic acids | 11825000 | 26          | 4395000 | 14          | 420000  |             | 1077500 |             | 2005000 | 88          |

|                                     |                |         |             |          |             |         |             |          |             |          |             |
|-------------------------------------|----------------|---------|-------------|----------|-------------|---------|-------------|----------|-------------|----------|-------------|
| L-(+)-Tartaric acid                 | Organic acids  | 293750  | 52          | 213250   | 08          | 64075   | 27          | 2822500  | 76          | 336750   | 07          |
|                                     |                |         | 0.0686±0.07 |          | 0.0681±0.03 |         | 0.0184±0.01 |          | 0.4658±0.22 |          | 0.0797±0.04 |
| 2,3-Dihydroxybenzoic Acid           | Organic acids  | 7170000 | 12          | 11450000 | 9           | 1922500 | 04          | 9100000  | 8           | 7880000  | 62          |
|                                     |                |         | 1.6784±0.37 |          | 3.656±1.068 |         | 0.5531±0.27 |          | 1.502±0.269 |          | 1.8661±0.96 |
| Phthalic acid                       | Organic acids  | 25800   | 0.006±0.015 | -        | -           | -       | -           | 48225    | 2           | 26075    | 76          |
|                                     |                |         | 0.9415±1.00 |          | 0.4564±0.33 |         | 2.4663±0.86 |          | 1.1152±0.36 |          | 1.1696±0.39 |
| D-Xylonic acid                      | Organic acids  | 4032500 | 04          | 1430000  | 39          | 8570000 | 74          | 6755000  | 53          | 4940000  | 48          |
|                                     |                |         | 0.2193±0.29 |          | 0.0359±0.06 |         | 0.1304±0.09 |          | 0.0404±0.02 |          | 0.0374±0.00 |
| Shikimic acid                       | Organic acids  | 933000  | 48          | 112150   | 07          | 453250  | 9           | 244500   | 98          | 158000   | 92          |
|                                     |                |         | 0.0228±0.02 |          | 0.0288±0.03 |         | 0.0287±0.02 |          | 0.016±0.030 |          | 0.0684±0.23 |
| SubericAcid                         | Organic acids  | 97350   | 15          | 90150    | 47          | 99650   | 33          | 96900    | 8           | 290000   | 82          |
|                                     |                |         | 0.9319±0.20 |          | 0.8862±0.12 |         | 1.3427±0.20 |          | 0.6123±0.14 |          | 2.4775±3.58 |
| Anchoic Acid                        | Organic acids  | 3977500 | 04          | 2775000  | 9           | 4665000 | 34          | 3707500  | 14          | 10480000 | 32          |
|                                     |                |         | 1.0087±0.42 |          | 0.693±0.130 |         | 2.1856±1.22 |          | 0.0894±0.02 |          | 0.2687±0.13 |
| Quinic Acid                         | Organic acids  | 4305000 | 97          | 2170000  | 4           | 7592500 | 85          | 541000   | 42          | 1135000  | 09          |
|                                     |                |         |             |          | 0.2027±0.15 |         | 0.1406±0.05 |          | 2.2761±1.20 |          | 1.4296±0.32 |
| D-Galacturonic acid(Gal A)          | Organic acids  | 504250  | 0.118±0.157 | 634500   | 08          | 488250  | 55          | 13800000 | 92          | 6037500  | 74          |
|                                     |                |         | 0.0075±0.00 |          | 0.0162±0.00 |         | 0.0051±0.01 |          | 0.0066±0.00 |          |             |
| Procyanidin A1                      | Flavonoids     | 32175   | 67          | 50800    | 53          | 17725   | 64          | 40150    | 84          | -        | -           |
|                                     |                |         | 0.3021±0.16 |          | 0.1485±0.06 |         | 0.6365±0.20 |          | 0.2041±0.10 |          |             |
| Procyanidin B2                      | Flavonoids     | 1290000 | 66          | 464750   | 22          | 2212500 | 17          | 1237500  | 44          | -        | -           |
|                                     |                |         | 0.2141±0.07 |          | 0.1053±0.06 |         | 0.4796±0.20 |          | 0.1513±0.04 |          |             |
| Procyanidin B3                      | Flavonoids     | 913250  | 74          | 329750   | 76          | 1667500 | 34          | 916750   | 66          | -        | -           |
|                                     |                |         | 0.2427±0.06 |          | 0.1145±0.08 |         | 0.5119±0.23 |          | 0.1642±0.04 |          |             |
| Procyanidin B1                      | Flavonoids     | 1035750 | 84          | 358500   | 91          | 1780000 | 05          | 995000   | 18          | -        | -           |
|                                     |                |         | 0.0183±0.00 |          | 0.0111±0.01 |         | 0.0654±0.03 |          | 0.011±0.021 |          |             |
| Procyanidin C2                      | Flavonoids     | 77950   | 92          | 34825    | 76          | 227000  | 32          | 66475    | 6           | -        | -           |
|                                     |                |         | 0.0015±0.00 |          |             |         | 0.0552±0.08 |          | 0.0013±0.00 |          | 0.0382±0.02 |
| Quercetin-O-rutinoside-O-rhamnoside | Flavonoids     | 6525    | 56          | 6318     | 0.002±0.004 | 192000  | 18          | 8018     | 29          | 161250   | 64          |
|                                     |                |         | 0.2793±0.10 |          | 0.1364±0.09 |         | 0.3987±0.22 |          | 0.2298±0.19 |          | 0.0239±0.05 |
| Calceorioside B                     | Others         | 1192500 | 41          | 427000   | 23          | 1385000 | 83          | 1392500  | 08          | 100925   | 44          |
|                                     |                |         | 0.0058±0.01 |          | 0.002±0.003 |         |             |          | 0.0055±0.00 |          |             |
| Quercetin-3',4'-dimethyl ether      | Flavonoids     | 25000   | 18          | 6400     | 7           | -       | -           | 33100    | 59          | -        | -           |
|                                     |                |         | 0.0063±0.01 |          | 0.0045±0.01 |         | 0.0047±0.00 |          | 0.0163±0.02 |          | 0.0442±0.04 |
| Isotamarixin                        | Flavonoids     | 26825   | 17          | 14135    | 99          | 16350   | 78          | 98125    | 55          | 186750   | 89          |
|                                     |                |         | 0.2085±0.11 |          | 0.3265±0.07 |         | 0.1164±0.07 |          | 0.1484±0.13 |          | 0.1164±0.04 |
| Stachydrine                         | Alkaloids      | 889500  | 61          | 1022250  | 13          | 404500  | 83          | 898500   | 09          | 491750   | 17          |
|                                     | Phenolic acids |         | 0.0064±0.00 |          | 0.0116±0.01 |         | 0.063±0.040 |          | 0.0673±0.05 |          | 0.0319±0.01 |
| Oresbuisin A                        | Phenolic acids | 27350   | 36          | 36225    | 88          | 219000  | 8           | 406750   | 64          | 134500   | 32          |
|                                     |                |         | 0.0095±0.00 |          | 0.0257±0.02 |         | 0.0113±0.01 |          | 0.0113±0.01 |          | 0.0351±0.02 |
| 5'-Glucopyranosyloxyjasmanic acid   | acids          | 40525   | 66          | 80650    | 19          | 39475   | 24          | 68500    | 03          | 148250   | 46          |

|                                                       |            |         |             |        |             |         |             |         |             |         |             |
|-------------------------------------------------------|------------|---------|-------------|--------|-------------|---------|-------------|---------|-------------|---------|-------------|
|                                                       |            |         | 0.0063±0.00 |        | 0.0051±0.00 |         | 0.0056±0.00 |         | 0.0079±0.00 |         | 0.002±0.002 |
| 5,7,2'-Trhiyroxy-8-methoxyflavone                     | Flavonoids | 26825   | 42          | 16025  | 44          | 19450   | 54          | 48000   | 36          | 8228    | 2           |
|                                                       |            |         |             |        |             |         |             |         | 0.0058±0.00 |         |             |
| 6-hydroxy-5,7,4'-trimethoxyflavone                    | Flavonoids | -       | -           | -      | -           | -       | -           | 35375   | 14          | -       | -           |
|                                                       |            |         | 0.0019±0.00 |        |             |         |             |         |             |         |             |
| Tetramethyluteolin (3',4',5,7-Tetramethoxyflavone)    | Flavonoids | 7945    | 03          | -      | -           | -       | -           | -       | -           | -       | -           |
|                                                       |            |         | 0.005±0.003 |        | 0.002±0.002 |         |             |         | 0.0022±0.00 |         |             |
| wogonoside                                            | Flavonoids | 21325   | 9           | 6233   | 3           | -       | -           | 13175   | 21          | -       | -           |
|                                                       |            |         | 0.0151±0.00 |        | 0.0078±0.01 |         | 0.9526±0.50 |         | 0.1696±0.03 |         | 0.2118±0.07 |
| Kaempferol-3-O-β-D-glucuronide                        | Flavonoids | 64600   | 76          | 24250  | 38          | 3312500 | 91          | 1027000 | 6           | 894500  | 24          |
|                                                       |            |         | 0.0147±0.01 |        | 0.0166±0.00 |         | 0.0038±0.00 |         | 0.0165±0.00 |         | 0.0599±0.02 |
| Isololiolide                                          | Others     | 62825   | 22          | 52025  | 88          | 13150   | 48          | 99925   | 03          | 253000  | 72          |
|                                                       |            |         | 0.0032±0.00 |        | 0.0029±0.00 |         | 0.0017±0.00 |         |             |         | 0.0014±0.00 |
| Stilbostemin B                                        | Others     | 13800   | 25          | 9023   | 57          | 5913    | 31          | 6073    | 0.001±0.002 | 5973    | 19          |
|                                                       |            |         | 0.0099±0.00 |        | 0.0086±0.01 |         |             |         |             |         |             |
| Prunellin A                                           | Others     | 42350   | 76          | 27000  | 43          | -       | -           | -       | -           | -       | -           |
|                                                       |            |         | 0.2376±0.16 |        | 0.1094±0.03 |         | 0.0036±0.01 |         | 0.3303±0.07 |         | 0.0054±0.01 |
| Quercetin-3-O-(2''-galloyl)-β-D-glucoside             | Flavonoids | 1015500 | 87          | 342500 | 32          | 12500   | 39          | 2000000 | 85          | 22800   | 94          |
|                                                       |            |         | 0.0067±0.01 |        | 0.0044±0.01 |         |             |         | 0.0051±0.01 |         | 0.0038±0.00 |
| Quercetin-3-O-(2'',3''-digalloyl)-β-D-glucopyranoside | Flavonoids | 28575   | 9           | 13690  | 02          | -       | -           | 30725   | 47          | 16025   | 54          |
|                                                       |            |         | 0.4565±0.89 |        | 0.1699±0.29 |         | 0.1032±0.17 |         | 0.5155±0.29 |         | 0.8062±0.74 |
| Methyl Brevifolincarboxylate                          | Others     | 1957500 | 54          | 531750 | 2           | 358500  | 06          | 3122500 | 5           | 3405000 | 81          |
|                                                       | Phenolic   |         | 0.0075±0.02 |        |             |         |             |         |             |         |             |
| Tercatain                                             | acids      | 31850   | 19          | -      | -           | -       | -           | -       | -           | -       | -           |
|                                                       | Phenolic   |         | 0.0113±0.02 |        | 0.0205±0.01 |         | 0.0215±0.02 |         | 0.0159±0.01 |         | 0.0335±0.02 |
| Salicylic acid                                        | acids      | 48200   | 02          | 64250  | 63          | 74775   | 99          | 96300   | 25          | 141750  | 18          |
|                                                       | Phenolic   |         |             |        |             |         |             |         |             |         |             |
| benzoylmalic acid                                     | acids      | 128000  | 0.03±0.0292 | -      | -           | -       | -           | -       | -           | -       | -           |
|                                                       | Phenolic   |         | 0.0238±0.02 |        | 0.019±0.016 |         |             |         |             |         |             |
| cinnamoyltartaric acid                                | acids      | 101375  | 51          | 59350  | 5           | -       | -           | -       | -           | -       | -           |
|                                                       | Phenolic   |         |             |        |             |         |             |         |             |         | 0.0173±0.01 |
| feruloylmalic acid                                    | acids      | -       | -           | -      | -           | -       | -           | -       | -           | 73300   | 2           |
|                                                       | Phenolic   |         |             |        |             |         | 0.0076±0.01 |         | 0.011±0.008 |         |             |
| vnilloylcaffeoyltartaric acid                         | acids      | -       | -           | -      | -           | 26300   | 19          | 66725   | 9           | -       | -           |
|                                                       | Phenolic   |         | 0.007±0.007 |        | 0.0046±0.00 |         | 0.0054±0.00 |         | 0.0264±0.01 |         | 0.0047±0.00 |
| feruloylsinapoyltartaric acid                         | acids      | 29925   | 1           | 14500  | 76          | 18850   | 44          | 160250  | 8           | 20000   | 81          |
|                                                       |            |         | 0.0022±0.00 |        | 0.0012±0.00 |         |             |         | 0.0008±0.00 |         | 0.0062±0.00 |
| Kaempferol-3-O-(cinnamoyl)-sophoroside-7-O-glucose    | Flavonoids | 9558    | 14          | 3783   | 14          | -       | -           | 4573    | 09          | 26125   | 56          |
|                                                       |            |         | 0.0486±0.07 |        | 0.0138±0.00 |         | 0.0153±0.03 |         | 0.0266±0.09 |         | 0.0199±0.02 |
| 3,5,7,4'--Tetrahydroxy-Coumaronochromone              | Others     | 207250  | 69          | 43125  | 74          | 53225   | 36          | 161000  | 13          | 84125   | 69          |
|                                                       | Phenolic   |         | 0.1593±0.16 |        | 0.0193±0.04 |         |             |         | 0.0133±0.05 |         | 0.0386±0.04 |
| Galloyl-HHDP(Hexahydroxydiphenoyl)-glueopy ranose     | acids      | 679000  | 43          | 60575  | 59          | -       | -           | 80050   | 96          | 163000  | 69          |

|                                                              |                |         |             |          |             |         |             |         |             |         |             |
|--------------------------------------------------------------|----------------|---------|-------------|----------|-------------|---------|-------------|---------|-------------|---------|-------------|
| 4- $\alpha$ -L-Rhamnopyranosyl-ellagic acid                  | Phenolic acids | 410000  | 0.0961±0.04 | 316250   | 0.101±0.085 | 531250  | 0.153±0.159 | 2385000 | 0.3944±0.33 | 6190000 | 1.4665±0.93 |
|                                                              |                | 22      |             | 9        |             | 1       |             | 57      |             | 06      |             |
| Angelicin                                                    | Coumarins      | -       | -           | -        | -           | 64575   | 0.0186±0.02 | -       | -           | -       | -           |
|                                                              |                |         | 0.0015±0.00 |          | 0.0017±0.00 |         | 0.0038±0.00 |         | 0.0065±0.01 |         | 0.0053±0.01 |
| Isoluteolin (Orobol)(5,7,3',4'-tetrahydroxyisoflavone)       | Flavonoids     | 6403    | 18          | 5348     | 11          | 13060   | 99          | 39575   | 88          | 22100   | 08          |
|                                                              |                |         | 0.0131±0.00 |          | 0.038±0.050 |         | 0.1597±0.39 |         | 0.0251±0.04 |         | 0.011±0.026 |
| 2'-Hydoxy,5-methoxy Genistein-O-rhamnosyl-glucoside          | Flavonoids     | 56075   | 57          | 119150   | 9           | 553500  | 41          | 151750  | 92          | 46600   | 8           |
|                                                              |                |         | 0.0031±0.00 |          | 0.0174±0.01 |         |             |         | 0.0173±0.02 |         | 0.0106±0.02 |
| 2'-Hydoxy,5-methoxy Genistein-4',7-O-diglucoside             | Flavonoids     | 13025   | 27          | 54475    | 67          | -       | -           | 104725  | 53          | 44700   | 65          |
|                                                              |                |         | 0.0026±0.00 |          | 0.0271±0.00 |         |             |         |             |         |             |
| Farrerol 7-O-glucoside                                       | Flavonoids     | 11183   | 22          | 84825    | 97          | -       | -           | -       | -           | -       | -           |
|                                                              |                |         | 0.4398±0.29 |          | 0.5469±0.19 |         |             |         | 0.3005±0.22 |         | 0.0645±0.09 |
| Quercetin 3-O- $\beta$ -D-xylopyranoside                     | Flavonoids     | 1875000 | 29          | 1712500  | 05          | -       | -           | 1822500 | 95          | 271750  | 37          |
|                                                              |                |         | 0.0112±0.02 |          | 0.0123±0.02 |         |             |         |             |         |             |
| Azalein (Azaleatin-3-O-rhamnoside)                           | Flavonoids     | 48225   | 81          | 38375    | 16          | -       | -           | -       | -           | -       | -           |
|                                                              |                |         | 1.6214±0.38 |          | 0.5669±0.23 |         | 0.5937±0.19 |         | 0.8041±0.32 |         | 0.5555±0.24 |
| isohyperoside                                                | Flavonoids     | 6917500 | 34          | 1775000  | 13          | 2062500 | 86          | 4872500 | 91          | 2345000 | 15          |
|                                                              |                |         | 0.1075±0.06 |          | 0.0363±0.00 |         | 0.0173±0.01 |         | 0.0672±0.05 |         | 0.0355±0.00 |
| Epipinoresinol                                               | Lignans        | 458750  | 89          | 113750   | 33          | 60075   | 11          | 407250  | 39          | 150000  | 45          |
|                                                              |                |         | 0.0366±0.00 |          | 0.0267±0.00 |         | 0.0093±0.01 |         | 0.0563±0.01 |         | 0.0193±0.01 |
| Olivil-4'-O- $\beta$ -D-glucoside                            | Lignans        | 156250  | 58          | 83425    | 92          | 32475   | 03          | 341000  | 72          | 81425   | 26          |
|                                                              |                |         | 0.0919±0.11 |          | 0.0381±0.01 |         | 0.0026±0.01 |         | 0.029±0.022 |         | 0.0292±0.01 |
| Eucommin A                                                   | Lignans        | 391250  | 41          | 119250   | 46          | 8983    | 12          | 175250  | 5           | 123500  | 8           |
|                                                              |                |         | 0.0065±0.00 |          | 0.0106±0.01 |         | 0.0054±0.01 |         | 0.0028±0.00 |         | 0.023±0.021 |
| Eucommia                                                     | Others         | 27550   | 62          | 33275    | 44          | 18875   | 05          | 17125   | 39          | 97250   | 2           |
|                                                              |                |         | 0.0101±0.00 |          |             |         | 0.074±0.114 |         | 0.0791±0.05 |         | 0.0099±0.01 |
| Syringaresinol-4'-O- $\beta$ -D-monO-glucoside               | Lignans        | 43075   | 62          | -        | -           | 257250  | 5           | 479000  | 13          | 42025   | 93          |
|                                                              |                |         | 0.0042±0.00 |          | 0.0025±0.00 |         |             |         | 0.0133±0.02 |         | 0.0016±0.00 |
| Luteolin-7-O- $\beta$ -D-gentiobioside                       | Flavonoids     | 17675   | 77          | 7980     | 94          | -       | -           | 80625   | 16          | 6625    | 21          |
|                                                              |                |         | 0.0141±0.01 |          | 0.0065±0.01 |         | 0.0091±0.01 |         | 0.0087±0.00 |         |             |
| Methyl dioxindole-3-acetate                                  | Others         | 60400   | 69          | 20375    | 52          | 31600   | 05          | 52950   | 68          | -       | -           |
|                                                              |                |         | 1.9929±0.23 |          | 5.7392±1.85 |         | 2.7922±0.15 |         | 1.0822±0.27 |         | 1.0214±0.43 |
| Ergotamine                                                   | Alkaloids      | 8505000 | 77          | 17975000 | 8           | 9702500 | 57          | 6555000 | 89          | 4315000 | 59          |
|                                                              |                |         | 0.0021±0.00 |          | 0.003±0.005 |         | 0.0112±0.01 |         | 0.0235±0.01 |         | 0.0009±0.00 |
| 3-methoxy-juglone                                            | Quinones       | 8800    | 4           | 9238     | 6           | 39075   | 62          | 142250  | 94          | 3980    | 46          |
|                                                              |                |         | 0.0162±0.00 |          | 0.0145±0.01 |         |             |         | 0.0103±0.00 |         | 0.0032±0.00 |
| 1,4,8-trihydroxy naphthalene-1-O- $\beta$ -D-glucopyranoside | Quinones       | 68975   | 37          | 45275    | 48          | 50875   | 0.0147±0.03 | 62350   | 77          | 13475   | 46          |
|                                                              |                |         | 0.0145±0.00 |          | 0.0201±0.01 |         | 0.0991±0.05 |         | 0.037±0.016 |         | 0.0133±0.01 |
| Isosalicylic acid O-glycoside                                | Phenolic acids | 61900   | 93          | 63025    | 66          | 344500  | 02          | 224000  | 3           | 56350   | 61          |
|                                                              |                |         | 0.1292±0.13 |          | 0.0172±0.02 |         | 0.0252±0.00 |         | 0.0475±0.02 |         | 0.0243±0.02 |
| p-Coumaric acid-O-glycoside                                  | Phenolic acids | 550500  | 77          | 54075    | 22          | 87725   | 95          | 287250  | 58          | 102650  | 25          |

|                                                            |                |         |             |         |             |         |             |          |             |         |             |
|------------------------------------------------------------|----------------|---------|-------------|---------|-------------|---------|-------------|----------|-------------|---------|-------------|
| Vanillic acid glycoside                                    | Phenolic acids | 15300   | 93          | 13950   | 76          | 11645   | 17          | 106250   | 95          | 19800   | 33          |
|                                                            |                |         | 0.0036±0.00 |         | 0.0045±0.00 |         | 0.0034±0.01 |          | 0.0176±0.00 |         | 0.0047±0.00 |
| Isosinapic acid-hexoside                                   | Phenolic acids | 61450   | 19          | 97150   | 0.031±0.041 | 74225   | 1           | 44050    | 05          | -       | -           |
|                                                            |                |         | 0.0145±0.02 |         |             |         | 0.0214±0.01 |          | 0.0073±0.01 |         |             |
| Sinapic acid-glycoside                                     | Phenolic acids | 28950   | 64          | 14475   | 6           | 72900   | 5           | 120250   | 44          | 41600   | 75          |
|                                                            |                |         | 0.0068±0.00 |         | 0.0046±0.00 |         | 0.021±0.014 |          | 0.0199±0.01 |         | 0.0099±0.00 |
| p-Hydroxycinnamic acid                                     | Phenolic acids | 180750  | 02          | 28550   | 28          | 48150   | 02          | 97800    | 29          | 110250  | 97          |
|                                                            |                |         | 0.0423±0.02 |         | 0.0091±0.02 |         | 0.0139±0.01 |          | 0.0162±0.01 |         | 0.0261±0.00 |
| 4-O-glucosyl-4-hydroxybenzoic acid                         | Phenolic acids | 65850   | 54          | 66300   | 87          | 330250  | 3           | 214250   | 31          | 60975   | 26          |
|                                                            |                |         | 0.0154±0.01 |         | 0.0212±0.00 |         | 0.095±0.054 |          | 0.0354±0.04 |         | 0.0144±0.02 |
| 4-O-glucosyl-3,4-dihydroxybenzyl alcohol                   | Phenolic acids | 69450   | 93          | 19150   | 42          | 143500  | 61          | 91275    | 15          | -       | -           |
|                                                            |                |         | 0.0163±0.01 |         | 0.0061±0.00 |         | 0.0413±0.01 |          | 0.0151±0.01 |         |             |
| 6-O-caffeoyl-β-glucose                                     | Phenolic acids | 826250  | 35          | 673250  | 88          | 453000  | 08          | 966000   | 24          | 321250  | 71          |
|                                                            |                |         | 0.1938±0.19 |         | 0.2151±0.08 |         | 0.1304±0.10 |          | 0.1596±0.07 |         | 0.0761±0.03 |
| 6-O-feruloyl-α-glucose                                     | Phenolic acids | 20000   | 82          | 27125   | 03          | 287250  | 2           | 124750   | 92          | 15875   | 75          |
|                                                            |                |         | 0.0047±0.01 |         | 0.0087±0.01 |         | 0.0827±0.06 |          | 0.0206±0.00 |         | 0.0038±0.00 |
| Kaempferol-3-O-(6''-acetyl)-glucoside                      | Flavonoids     | 33475   | 39          | 12110   | 53          | 236000  | 77          | 55625    | 44          | 35825   | 5           |
|                                                            |                |         | 0.0078±0.00 |         | 0.0039±0.00 |         | 0.0679±0.03 |          | 0.0092±0.00 |         | 0.0085±0.01 |
| Lariciresinol glucopyranoside                              | Others         | 189500  | 98          | 84900   | 43          | -       | -           | 60650    | 69          | 29175   | 05          |
|                                                            |                |         | 0.0444±0.00 |         | 0.0271±0.02 |         |             |          | 0.0101±0.01 |         | 0.0069±0.01 |
| Betulinic acid                                             | Terpenoids     | 1196    | 16          | 4220    | 29          | 870     | 08          | 7738     | 36          | 10005   | 55          |
|                                                            |                |         | 0.0003±0.00 |         | 0.0014±0.00 |         | 0.0003±0.00 |          | 0.0013±0.00 |         | 0.0024±0.00 |
| Ovalifoliolides B                                          | Terpenoids     | 17575   | 37          | 16750   | 3           | -       | -           | 4450     | 21          | -       | -           |
|                                                            |                |         | 0.0041±0.00 |         | 0.0054±0.00 |         |             |          | 0.0007±0.00 |         |             |
| Eriodictyol-O-glucoside                                    | Flavonoids     | 337500  | 9           | 1360000 | 4           | 121500  | 3           | 1577500  | 56          | 43850   | 11          |
|                                                            |                |         | 0.079±0.025 |         | 0.4342±0.14 |         | 0.035±0.015 |          | 0.2605±0.03 |         | 0.0104±0.01 |
| Quercetin-3-O-(6''-O-acetyl)-galactoside                   | Flavonoids     | 87125   | 16          | 16875   | 78          | 228250  | 6           | 21325    | 24          | 23150   | 72          |
|                                                            |                |         | 0.0205±0.02 |         | 0.0054±0.00 |         | 0.0657±0.01 |          | 0.0035±0.00 |         | 0.0055±0.00 |
| Nortrachelogenin 4-O-β-D-glucoside                         | Lignans        | 159000  | 82          | 70725   | 47          | 34575   | 61          | 47050    | 69          | 29075   | 08          |
|                                                            |                |         | 0.0373±0.02 |         | 0.0226±0.02 |         | 0.0099±0.01 |          | 0.0078±0.00 |         | 0.0069±0.02 |
| Kaempferol 3-O-β-d-(6''-O-(E)-p-coumaroyl) glucopyranoside | Flavonoids     | 2350000 | 19          | 2400000 | 21          | 3787500 | 68          | 11975000 | 28          | 6090000 | 07          |
|                                                            |                |         | 0.5508±0.22 |         | 0.7658±0.79 |         | 1.0904±0.56 |          | 1.9773±0.78 |         | 1.4412±0.63 |
| Sexangularetin 3-glucoside-7-rhamnoside                    | Flavonoids     | 53850   | 9           | 123825  | 17          | 594750  | 3           | 148250   | 13          | 39075   | 83          |
|                                                            |                |         | 0.0126±0.01 |         | 0.0395±0.05 |         | 0.171±0.479 |          | 0.0245±0.04 |         | 0.0093±0.01 |
| Dimethylmalonic acid                                       | Organic acids  | 49525   | 62          | 17050   | 28          | 26300   | 31          | 58900    | 31          | 54400   | 85          |
|                                                            |                |         | 0.0116±0.00 |         | 0.0054±0.01 |         | 0.0076±0.01 |          | 0.0097±0.01 |         | 0.0129±0.01 |
| Limocitrin 7-glucoside                                     | Flavonoids     | -       | -           | 110350  | 91          | -       | -           | -        | -           | -       | -           |
|                                                            |                |         | 0.0352±0.03 |         | 0.1303±0.06 |         | 0.3833±0.41 |          | 0.2219±0.14 |         | 0.0259±0.02 |
| Isorhamnetin-7-O-glucoside                                 | Flavonoids     | 1145500 | 99          | 407750  | 75          | 1332500 | 29          | 1345000  | 72          | 109575  | 05          |
|                                                            |                |         | 0.2675±0.34 |         | 0.1911±0.09 |         | 0.0556±0.03 |          | 0.0907±0.04 |         | 0.0371±0.00 |
| Dihydroisopelletierine                                     | Alkaloids      | 602000  | 3           | 598250  | 71          | 193250  | 43          | 549500   | 81          | 156500  | 77          |

|                                                     |                |         |             |    |        |             |         |       |         |             |         |             |
|-----------------------------------------------------|----------------|---------|-------------|----|--------|-------------|---------|-------|---------|-------------|---------|-------------|
| Dihydrosedinine                                     | Alkaloids      | 257500  | 0.0604±0.02 | 62 | 254250 | 9           | 583250  | 37    | 220750  | 84          | 211750  | 83          |
| Parthenolide                                        | Terpenoids     | 126750  | 0.0297±0.02 | 05 | 285500 | 74          | 49200   | 82    | 71375   | 77          | 7830    | 19          |
| Santamarin                                          | Terpenoids     | -       | -           | -  | -      | 539000      | 54      | 31250 | 85      | 26450       | 82      | 0.0063±0.00 |
| Ixerin D                                            | Terpenoids     | 200000  | 0.0469±0.01 | 73 | 60750  | 85          | 32250   | 5     | 81725   | 94          | 88300   | 79          |
| Silibinin                                           | Flavonoids     | -       | -           | -  | -      | 791500      | 84      | 55700 | 28      | 3220        | 04      | 0.0008±0.00 |
| Hispidulin                                          | Flavonoids     | 13375   | 0.0031±0.00 | 27 | 7553   | 09          | 7200    | 22    | 28225   | 16          | 3398    | 19          |
| Eupatilin                                           | Flavonoids     | 5053    | 0.0012±0.00 | 18 | 12400  | 7           | -       | -     | 20050   | 15          | -       | -           |
| Penduletin (5,4'-Dihydroxy-3,6,7-trimethoxyflavone) | Flavonoids     | 3438    | 0.0008±0.00 | 09 | 9840   | 04          | -       | -     | 13400   | 25          | -       | -           |
| Acacetin-7-O-glucuronide                            | Flavonoids     | 26750   | 0.0063±0.00 | 87 | -      | -           | -       | -     | 12075   | 9           | -       | -           |
| Scutellarin(Scutellarein-7-O-glucuronide)           | Flavonoids     | 74000   | 0.0173±0.01 | 71 | 25125  | 3           | 3185000 | 2     | 939000  | 0.155±0.084 | 836750  | 81          |
| Diosmetin-7-O-galactoside                           | Flavonoids     | 141500  | 0.0332±0.03 | 43 | 91625  | 0.0293±0.02 | 63625   | 47    | 167750  | 72          | 25625   | 81          |
| Pratensein 7-O-glucopyranoside                      | Flavonoids     | 9428    | 0.0022±0.00 | 76 | 70500  | 43          | -       | -     | 4443    | 11          | -       | -           |
| Diosmetin-7-O-glucuronide                           | Flavonoids     | 41725   | 0.0098±0.01 | 78 | -      | -           | -       | -     | -       | -           | -       | -           |
| 6-methoxykaempferol-3-O-glucoside                   | Flavonoids     | 1145000 | 0.2684±0.15 | 87 | 404500 | 04          | 1417500 | 51    | 1427500 | 96          | 112150  | 91          |
| Patuletin-3-O-β-D-glucopyranoside                   | Flavonoids     | 80025   | 0.0188±0.02 | 52 | -      | -           | -       | -     | -       | -           | -       | -           |
| Luteolin-7-O-rutinoside                             | Flavonoids     | 61050   | 0.0143±0.02 | 56 | 102175 | 3           | 1151500 | 73    | 112500  | 36          | 306000  | 2           |
| Quercetin-7-O-(6'-O-malonyl)-β-D-glucoside          | Flavonoids     | 45875   | 0.0107±0.01 | 81 | 26225  | 33          | 47750   | 71    | 109825  | 55          | 10620   | 45          |
| 3-O-(2-O-Acetyl-β-D-glucopyranosyl) oleanolic acid  | Terpenoids     | 595500  | 0.1396±0.09 | 91 | 948250 | 09          | 250000  | 2     | 2460000 | 72          | 2002500 | 14          |
| 5,2'-Dihydroxy-7,8-dimethoxyflavone glycosides      | Flavonoids     | -       | 0.001±0.001 | -  | 2980   | 5           | -       | -     | 40950   | 46          | -       | -           |
| 3,4-Di-O-galloyl-shikimic acid                      | Phenolic acids | 173250  | 0.0406±0.01 | 89 | 119550 | 59          | 132500  | 68    | 1013250 | 02          | 348250  | 53          |
| 3-O-Digalloyl quinic acid                           | Phenolic acids | 109000  | 0.0254±0.04 | 31 | 18000  | 59          | 3880000 | 46    | 168250  | 0.0277±0.03 | 37225   | 62          |



|                                       |                |         |    |             |         |    |          |    |             |         |             |         |             |    |             |
|---------------------------------------|----------------|---------|----|-------------|---------|----|----------|----|-------------|---------|-------------|---------|-------------|----|-------------|
| Di-O-Glucose-quinic acid              | Phenolic acids | 2912500 | 2  | 0.6845±0.73 | 832000  | 59 | 756500   | 37 | 0.2179±0.12 | 300250  | 54          | 163000  | 0.0497±0.05 | 93 | 0.0386±0.01 |
| 5-O-Galloylhamamelose                 | Phenolic acids | 6890000 | 08 | 1.6138±0.32 | 1595000 | 04 | 1170000  | 87 | 0.3367±0.09 | 6340000 | 02          | 689750  | 1.0467±0.27 | 51 | 0.1634±0.05 |
| Gemin D                               | Phenolic acids | 626000  | 59 | 0.1467±0.11 | 58875   | 07 | -        | -  | 0.0188±0.05 | 74575   | 49          | 139250  | 0.0123±0.02 | 89 | 0.0329±0.03 |
| Nobotanin D                           | Phenolic acids | 32375   | 41 | 0.0076±0.01 | -       | -  | -        | -  | 0.0041±0.00 | -       | -           | -       | 0.0029±0.00 | -  | -           |
| Cuspinin                              | Phenolic acids | 99675   | 33 | 0.0233±0.03 | 12700   | 75 | -        | -  | 0.0711±0.04 | 17450   | 92          | -       | 0.0987±0.08 | -  | 0.0802±0.14 |
| mlyricetin 3-O-B-D-glucopyranoside    | Flavonoids     | 864250  | 76 | 0.2028±0.19 | 223250  | 1  | 247000   | 11 | 0.0712±0.08 | 598750  | 57          | 338750  | 0.0769±0.04 | 6  | 0.0081±0.01 |
| Mearnsitrin                           | Flavonoids     | 252250  | 3  | 0.059±0.058 | 115500  | 2  | 529500   | 08 | 0.1524±0.05 | 465500  | 82          | 34225   | 0.0769±0.04 | 03 | 0.0083±0.01 |
| 2,4,6-trihydroxy benzoic acid         | Organic acids  | 98725   | 14 | 0.0233±0.06 | 117250  | 47 | 26725    | 75 | 0.0374±0.02 | 99675   | 0.0164±0.02 | 35175   | 0.0077±0.01 | 38 | 0.0126±0.01 |
| Clemaphenol A                         | Lignans        | 189750  | 26 | 0.0443±0.04 | 6865    | 72 | 12950    | 23 | 0.0022±0.00 | 76150   | 28          | -       | 0.0126±0.01 | -  | -           |
| Ailantinol E                          | Others         | 27050   | 54 | 0.0063±0.00 | 10030   | 34 | 365500   | 62 | 0.0032±0.00 | 128250  | 33          | 39650   | 0.1051±0.05 | 64 | 0.0212±0.00 |
| Ailanindole                           | Alkaloids      | 50850   | 96 | 0.0119±0.00 | 20575   | 65 | 35575    | 1  | 0.0102±0.02 | 218250  | 68          | 29550   | 0.0361±0.11 | 33 | 0.0069±0.05 |
| 6-Hydroxy-7-methoxycoumarin           | Coumarins      | 16900   | 17 | 0.0039±0.01 | 82275   | 63 | 1102500  | 62 | 0.0263±0.01 | 20150   | 22          | 991500  | 0.3173±0.09 | 85 | 0.0033±0.00 |
| Ayapin                                | Coumarins      | 230250  | 7  | 0.054±0.014 | 168250  | 51 | 275000   | 72 | 0.0537±0.01 | 228750  | 48          | 643750  | 0.0791±0.01 | 13 | 0.1521±0.25 |
| Tubuloside C                          | Phenolic acids | 63350   | 22 | 0.0149±0.02 | 38650   | 96 | 11050000 | 8  | 0.0123±0.02 | 219250  | 68          | 287500  | 0.0362±0.02 | 54 | 0.0681±0.05 |
| Swertiamarin                          | Terpenoids     | 52350   | 21 | 0.0123±0.01 | 15950   | 41 | 54050    | 11 | 0.0051±0.01 | 51950   | 02          | -       | 0.0156±0.02 | -  | 0.0086±0.01 |
| 3-O-Galloyl-β-D-glucose               | Phenolic acids | 7002500 | 39 | 1.6421±0.83 | 1620000 | 33 | 1160000  | 98 | 0.3339±0.14 | 6420000 | 22          | 680750  | 1.0596±0.23 | 65 | 0.1612±0.05 |
| 2-O-Galloyl-β-D-glucose               | Phenolic acids | 1547500 | 49 | 0.3624±0.20 | 2542500 | 4  | 4562500  | 85 | 0.8121±0.17 | 5400000 | 15          | 3882500 | 1.3133±0.23 | 86 | 0.8913±0.30 |
| Geraniinic acid C                     | Phenolic acids | 22400   | 69 | 0.0052±0.01 | -       | -  | -        | -  | 0.0037±0.00 | 23275   | 52          | 58225   | 0.0038±0.00 | 87 | 0.0138±0.01 |
| Glucosyloxybenzoic acid               | Phenolic acids | 66875   | 97 | 0.0157±0.02 | 60200   | 7  | 280250   | 22 | 0.0192±0.01 | 214250  | 97          | 60575   | 0.0807±0.03 | 93 | 0.0354±0.01 |
| 5-(2-Hydroxyethyl)-2-O-glucosylohenol | Phenolic acids | 674750  | 46 | 0.1583±0.13 | 827500  | 8  | 589000   | 56 | 0.2645±0.22 | 437000  | 98          | 41700   | 0.1695±0.04 | 35 | 0.0722±0.06 |
| Cimidahurinine                        | Phenolic acids | 944000  | 02 | 0.2213±0.20 | 1187500 | 99 | 828000   | 5  | 0.3793±0.11 | 639000  | 3           | 46950   | 0.2384±0.10 | 97 | 0.1052±0.14 |

|                                                               |            |         |             |          |             |         |             |          |             |          |             |
|---------------------------------------------------------------|------------|---------|-------------|----------|-------------|---------|-------------|----------|-------------|----------|-------------|
|                                                               |            |         | 0.0771±0.05 |          |             |         | 0.0334±0.02 |          | 0.2489±0.03 |          | 0.0106±0.00 |
| Dihydrokaempferol-7-O-glucoside                               | Flavonoids | 329250  | 12          | 1427500  | 0.4556±0.29 | 116000  | 16          | 1507500  | 25          | 44750    | 98          |
|                                                               |            |         | 1.7237±0.76 |          | 3.5036±1.23 |         | 1.3217±0.23 |          | 1.9697±0.63 |          | 2.7889±0.88 |
| Hederagenin                                                   | Others     | 7357500 | 54          | 10975000 | 25          | 4592500 | 09          | 11925000 | 76          | 11775000 | 28          |
|                                                               |            |         | 0.1516±0.04 |          | 0.2263±0.17 |         | 0.3389±0.14 |          | 0.6618±0.34 |          | 0.4667±0.34 |
| Biondnoid I                                                   | Flavonoids | 647250  | 49          | 709250   | 43          | 1177500 | 35          | 4007500  | 77          | 1970000  | 02          |
|                                                               | Phenolic   |         |             |          | 0.0797±0.03 |         |             |          |             |          | 0.0047±0.00 |
| Sinapaldehyde Glucoside                                       | acids      | -       | -           | 249500   | 37          | -       | -           | -        | -           | 19725    | 91          |
|                                                               | Phenolic   |         | 0.0326±0.02 |          | 0.0172±0.02 |         | 0.0084±0.01 |          | 0.0155±0.01 |          |             |
| Plantainoside A                                               | acids      | 139500  | 87          | 53975    | 11          | 29225   | 01          | 93925    | 22          | -        | -           |
|                                                               |            |         | 0.6574±0.30 |          | 0.2902±0.34 |         | 0.5114±0.35 |          | 0.6302±0.28 |          | 0.6012±0.12 |
| Quercetin-3-O-α-L-rhamnopyranoside                            | Flavonoids | 2807500 | 78          | 907750   | 04          | 1777500 | 84          | 3817500  | 68          | 2540000  | 78          |
|                                                               |            |         | 0.0025±0.00 |          | 0.0037±0.00 |         | 0.0715±0.09 |          | 0.0016±0.00 |          | 0.0363±0.04 |
| Quercetin-3-O-(2-O-α-L-rhamnopyranosyl)-β-D-galactopyranoside | Flavonoids | 10833   | 49          | 11548    | 47          | 248500  | 04          | 9508     | 2           | 153250   | 73          |
|                                                               | Phenolic   |         | 1.6319±0.32 |          | 0.5135±0.21 |         | 0.3246±0.14 |          | 1.0749±0.29 |          | 0.158±0.103 |
| 6-O-Galloyl-β-D-glucose                                       | acids      | 6970000 | 06          | 1607500  | 7           | 1127500 | 28          | 6510000  | 02          | 667000   | 7           |
|                                                               | Phenolic   |         | 0.1145±0.06 |          | 0.0204±0.03 |         |             |          | 0.0131±0.04 |          |             |
| Maplexin D (2,4-Di-O-Galloyl-1,5-Anhydro-D-Glucitol)          | acids      | 489250  | 55          | 63925    | 77          | -       | -           | 79700    | 82          | -        | -           |
|                                                               | Phenolic   |         | 0.1479±0.18 |          | 0.0361±0.05 |         |             |          | 0.0198±0.04 |          |             |
| Maplexin C (2,3-Di-O-Galloyl-1,5-Anhydro-D-Glucitol)          | acids      | 633500  | 5           | 112975   | 38          | -       | -           | 119750   | 75          | -        | -           |
|                                                               | Phenolic   |         | 0.0336±0.05 |          | 0.0163±0.01 |         | 0.0059±0.01 |          | 0.1448±0.11 |          | 0.0337±0.04 |
| 2,3-Di-O-Galloyl-D-Glucose                                    | acids      | 144250  | 5           | 51050    | 95          | 20525   | 44          | 877000   | 71          | 142500   | 11          |
|                                                               | Phenolic   |         | 0.0943±0.04 |          | 0.0214±0.03 |         | 0.0063±0.01 |          | 0.0035±0.00 |          | 0.0023±0.00 |
| Methyl 4,6-di-O-galloyl-D-glucoside                           | acids      | 402250  | 75          | 67075    | 34          | 22025   | 89          | 21150    | 46          | 9753     | 93          |
|                                                               | Phenolic   |         | 0.0797±0.09 |          | 0.0558±0.06 |         | 0.0071±0.01 |          | 0.0901±0.06 |          | 0.0154±0.02 |
| Maplexin H                                                    | acids      | 340500  | 53          | 174750   | 97          | 24575   | 37          | 545250   | 66          | 65050    | 76          |
|                                                               | Phenolic   |         | 0.0164±0.02 |          | 0.0083±0.01 |         | 0.0067±0.01 |          | 0.028±0.028 |          | 0.0122±0.01 |
| Maplexin G                                                    | acids      | 70350   | 06          | 26100    | 16          | 23375   | 42          | 169500   | 3           | 51550    | 28          |
|                                                               |            |         | 0.0114±0.01 |          | 0.0071±0.01 |         | 0.008±0.011 |          | 0.2334±0.34 |          | 0.0261±0.07 |
| Geniposide                                                    | Terpenoids | 48475   | 19          | 22375    | 11          | 27775   | 6           | 1412500  | 39          | 110000   | 17          |
|                                                               |            |         | 0.0805±0.09 |          | 0.0116±0.01 |         |             |          | 0.0712±0.12 |          | 0.0021±0.00 |
| 7'-O-Sinapoyljasminoside L                                    | Terpenoids | 343500  | 46          | 36350    | 25          | -       | -           | 431500   | 39          | 8953     | 27          |
|                                                               |            |         |             |          | 0.0023±0.00 |         | 0.0167±0.02 |          | 0.0129±0.01 |          | 0.2729±0.16 |
| Quercetin-3-sambubioside                                      | Flavonoids | -       | -           | 7178     | 43          | 58050   | 52          | 78050    | 54          | 1152500  | 44          |
|                                                               |            |         | 0.0035±0.00 |          | 0.0036±0.00 |         | 0.002±0.006 |          | 0.0112±0.00 |          | 0.0238±0.01 |
| Betulin                                                       | Terpenoids | 14750   | 35          | 11280    | 51          | 6995    | 1           | 67550    | 77          | 100725   | 53          |
|                                                               |            |         | 0.0135±0.01 |          | 0.0362±0.01 |         |             |          | 0.0329±0.02 |          | 0.0085±0.00 |
| Uncargenin D                                                  | Terpenoids | 57575   | 63          | 113250   | 81          | -       | -           | 199000   | 94          | 35700    | 68          |
|                                                               |            |         | 0.0119±0.00 |          | 0.0312±0.03 |         | 0.0015±0.00 |          | 0.0154±0.00 |          | 0.0452±0.01 |
| Obtusilin                                                     | Terpenoids | 50800   | 27          | 97675    | 52          | 5290    | 37          | 93025    | 51          | 190750   | 7           |
|                                                               |            |         | 0.0077±0.01 |          | 0.0066±0.00 |         | 0.0029±0.00 |          | 0.0064±0.00 |          | 0.0059±0.01 |
| Dihydromyricetin-O-glucoside                                  | Flavonoids | 32600   | 48          | 20525    | 75          | 10118   | 84          | 38775    | 26          | 25025    | 27          |

|                                                            |                |         |             |         |             |         |             |         |             |         |             |
|------------------------------------------------------------|----------------|---------|-------------|---------|-------------|---------|-------------|---------|-------------|---------|-------------|
| Syringic Aldehyde-glucoside                                | Phenolic acids | 47975   | 92          | 54825   | 83          | 246500  | 23          | -       | -           | -       | -           |
|                                                            |                |         | 0.0113±0.01 |         | 0.0175±0.03 |         | 0.0708±0.10 |         |             |         |             |
| 1'-O-vanilloyl-β-D-glucoside                               | Phenolic acids | 24000   | 46          | 12148   | 67          | 13275   | 87          | 517500  | 69          | 31625   | 96          |
|                                                            |                |         | 0.0056±0.01 |         | 0.0039±0.01 |         | 0.0038±0.00 |         | 0.0854±0.02 |         | 0.0075±0.00 |
| 3-Prenyl-4-O-β-D-glucopyranosyloxy-4-hydroxyl-benzoic acid | Phenolic acids | 19750   | 84          | -       | -           | 224750  | 59          | -       | -           | 31675   | 84          |
|                                                            |                |         | 0.0046±0.00 |         |             |         | 0.0647±0.06 |         |             |         | 0.0075±0.01 |
|                                                            |                |         | 0.0029±0.00 |         | 0.0043±0.00 |         | 0.0446±0.05 |         | 0.0209±0.01 |         |             |
| Sieboldin                                                  | Flavonoids     | 12475   | 69          | 13498   | 95          | 155250  | 23          | 126500  | 17          | -       | -           |
|                                                            |                |         | 0.0088±0.01 |         | 0.0062±0.00 |         | 0.0133±0.01 |         | 0.0084±0.00 |         | 0.0029±0.00 |
| Kaempferol-malonyl-3-O-glucoside                           | Flavonoids     | 37600   | 66          | 19550   | 66          | 46300   | 31          | 51000   | 41          | 12210   | 41          |
|                                                            |                |         | 0.0009±0.00 |         | 0.0009±0.00 |         | 0.0031±0.00 |         | 0.0012±0.00 |         |             |
| Isorhamnetin O-malonylglucoside                            | Flavonoids     | 3805    | 19          | 2863    | 1           | 10730   | 66          | 7090    | 1           | -       | -           |
|                                                            |                |         | 0.0069±0.01 |         | 0.0056±0.00 |         | 0.0251±0.02 |         | 0.0365±0.04 |         | 0.0087±0.01 |
| Kaempferol 3-O-(6''-trans-p-Coumaroyl)-β-D-glucopyranoside | Flavonoids     | 29425   | 35          | 17650   | 27          | 87225   | 41          | 221500  | 14          | 36725   | 92          |
|                                                            |                |         | 0.0384±0.05 |         | 0.0186±0.02 |         | 0.0028±0.00 |         | 0.0437±0.05 |         |             |
| Kampferol 3-O-(6''-galloyl)-β-D-galactopyranoside          | Flavonoids     | 164250  | 73          | 58225   | 1           | 9803    | 72          | 265500  | 3           | -       | -           |
|                                                            |                |         | 0.0432±0.00 |         | 0.0213±0.03 |         |             |         | 0.0416±0.02 |         |             |
| Kampferol 3-O-(2''-galloyl)-β-D-galactopyranoside          | Flavonoids     | 184250  | 27          | 66700   | 04          | -       | -           | 252500  | 34          | -       | -           |
|                                                            |                |         | 0.2451±0.19 |         | 0.1155±0.08 |         | 0.0038±0.00 |         | 0.3356±0.10 |         | 0.0055±0.01 |
| Quercetin 3-O-(6''-galloyl)-β-D-galactopyranoside          | Flavonoids     | 1046750 | 07          | 361500  | 29          | 13308   | 95          | 2032500 | 82          | 23375   | 17          |
|                                                            |                |         |             |         | 0.0023±0.00 |         | 0.0038±0.01 |         |             |         | 0.0222±0.03 |
| Quercetin-O-pentosyl-O-rhamnoside-O-glucoside              | Flavonoids     | -       | -           | 7253    | 14          | 13365   | 53          | -       | -           | 93425   | 83          |
|                                                            |                |         | 0.0806±0.04 |         | 0.0357±0.01 |         | 0.0026±0.00 |         | 0.0107±0.00 |         | 0.0008±0.00 |
| Cinchonain Ic                                              | Flavonoids     | 344500  | 42          | 111750  | 27          | 9093    | 32          | 64500   | 73          | 3258    | 15          |
|                                                            |                |         | 0.1186±0.04 |         |             |         | 0.1555±0.08 |         | 0.2962±0.11 |         | 0.1292±0.05 |
| dihydrodehydrodiconiferyl alcohol 4-O-β-D-glucopyranosides | Lignans        | 506000  | 64          | 224000  | 0.0716±0.04 | 540250  | 6           | 1795000 | 68          | 545750  | 53          |
|                                                            |                |         | 0.0218±0.02 |         | 0.0142±0.03 |         | 0.7569±0.20 |         | 0.0546±0.02 |         | 0.024±0.015 |
| (-)-secoisolariciresinol 4-O-β-D-giucopyranoside           | Lignans        | 92900   | 01          | 44600   | 5           | 2630000 | 02          | 331000  | 58          | 101425  | 3           |
|                                                            |                |         | 0.1136±0.05 |         | 0.1154±0.03 |         | 0.0253±0.02 |         | 0.0252±0.02 |         | 0.0177±0.01 |
| Roseoside                                                  | Others         | 484750  | 68          | 361250  | 97          | 87875   | 31          | 152500  | 58          | 74975   | 17          |
|                                                            |                |         | 0.0242±0.03 |         | 0.0223±0.02 |         | 0.0721±0.17 |         | 0.0174±0.01 |         | 0.0211±0.02 |
| p-Coumaroyleuscaphic acid                                  | Terpenoids     | 103525  | 27          | 69675   | 87          | 251000  | 89          | 105400  | 35          | 88775   | 77          |
|                                                            |                |         | 0.1534±0.22 |         | 0.1383±0.19 |         | 0.0281±0.02 |         | 0.2453±0.33 |         | 0.1171±0.09 |
| Caffeoyl hawthorn acid                                     | Terpenoids     | 652750  | 24          | 432500  | 54          | 97625   | 86          | 1485000 | 08          | 494500  | 09          |
|                                                            |                |         | 0.0204±0.00 |         | 0.0106±0.02 |         | 0.0037±0.00 |         | 0.0072±0.00 |         | 0.0041±0.00 |
| 3-O-Trans-feruloyl euscaphic acid                          | Terpenoids     | 87050   | 7           | 33275   | 38          | 12750   | 37          | 43325   | 68          | 17300   | 66          |
|                                                            |                |         | 0.0249±0.00 |         | 0.0837±0.07 |         |             |         |             |         |             |
| 3β-Hydroxy-28-norurs-17,19,21-trien                        | Terpenoids     | 106500  | 89          | 262250  | 42          | -       | -           | -       | -           | -       | -           |
|                                                            |                |         | 0.1912±0.13 |         | 0.3695±0.23 |         | 0.0672±0.02 |         | 0.3823±0.03 |         | 0.3167±0.13 |
| Sanguisorbigenin                                           | Terpenoids     | 816750  | 16          | 1157500 | 69          | 233500  | 83          | 2315000 | 88          | 1337500 | 19          |
|                                                            |                |         | 0.0073±0.00 |         | 0.0312±0.01 |         |             |         | 0.0014±0.00 |         | 0.0272±0.00 |
| Lup-12-en-15α,19β-diol-3,11-dioxo-28-oic acid              | Terpenoids     | 31125   | 31          | 97575   | 04          | -       | -           | 8480    | 16          | 114750  | 95          |

|                                                            |            |         |             |          |             |         |             |          |             |          |             |
|------------------------------------------------------------|------------|---------|-------------|----------|-------------|---------|-------------|----------|-------------|----------|-------------|
| Solatuberenol A                                            | Others     | 792000  | 62          | 496250   | 36          | 87325   | 3           | 201750   | 27          | 107250   | 75          |
|                                                            |            |         | 0.1859±0.15 |          | 0.1582±0.29 |         | 0.0251±0.00 |          | 0.0333±0.02 |          | 0.0254±0.04 |
| Cis-p-coumaric acid 4-O-glucoside                          | Others     | 511250  | 0.12±0.1038 | 48775    | 41          | 88575   | 6           | 286750   | 92          | 92275    | 2           |
|                                                            |            |         | 0.0025±0.00 |          | 0.0083±0.00 |         | 0.0032±0.00 |          | 0.0051±0.00 |          | 0.0063±0.02 |
| 6-Deoxyfagomine                                            | Alkaloids  | 10460   | 4           | 26075    | 76          | 11018   | 42          | 30800    | 21          | 26750    | 07          |
|                                                            |            |         | 0.0008±0.00 |          | 0.0014±0.00 |         | 0.0055±0.00 |          | 0.0138±0.00 |          | 0.0017±0.01 |
| 3-Indoleacrylic acid                                       | Alkaloids  | 3473    | 17          | 4493     | 52          | 19175   | 45          | 83575    | 37          | 7253     | 66          |
|                                                            |            |         | 0.0944±0.05 |          | 0.1997±0.12 |         | 0.0358±0.02 |          |             |          | 0.0695±0.06 |
| L-Ascorbic acid                                            | Vitamins   | 402750  | 15          | 625750   | 18          | 124250  | 14          | 726500   | 0.12±0.1355 | 293500   | 25          |
|                                                            |            |         | 0.2721±0.27 |          | 0.1383±0.17 |         | 0.3835±0.33 |          | 0.2201±0.15 |          | 0.0256±0.04 |
| Isorhamnetin 3-O-β-D-Glucoside                             | Flavonoids | 1161000 | 74          | 432500   | 85          | 1332500 | 44          | 1335000  | 42          | 107875   | 76          |
|                                                            |            |         | 0.2747±0.07 |          | 0.1309±0.03 |         | 0.4125±0.22 |          | 0.2289±0.17 |          | 0.0252±0.01 |
| Rhamnetin 3-O-β-D-Glucoside                                | Flavonoids | 1172500 | 27          | 409750   | 18          | 1432500 | 83          | 1387500  | 85          | 106350   | 11          |
|                                                            |            |         | 0.0391±0.07 |          | 0.0963±0.15 |         | 1.0773±1.03 |          | 0.0653±0.12 |          | 0.1876±0.11 |
| Kaempferol 3-O-β-D-neohesperidoside                        | Flavonoids | 166500  | 65          | 301500   | 33          | 3740000 | 23          | 394250   | 9           | 792000   | 49          |
|                                                            |            |         |             |          | 0.0031±0.00 |         | 0.0149±0.01 |          |             |          | 0.2683±0.30 |
| Quercetin 3-O-β-D-xylopyranosyl(1→2)-β-D-galactopyranoside | Flavonoids | -       | -           | 9708     | 97          | 51825   | 1           | -        | -           | 1133750  | 25          |
|                                                            |            |         | 0.1422±0.18 |          | 0.377±0.172 |         | 1.2055±0.81 |          | 0.3789±0.22 |          | 0.3289±0.42 |
| Quercetin 3-O-β-D-neohesperidoside                         | Flavonoids | 608750  | 55          | 1180000  | 8           | 4190000 | 66          | 2292500  | 58          | 1387500  | 55          |
|                                                            |            |         | 0.0262±0.03 |          | 0.0251±0.02 |         | 0.0438±0.04 |          | 0.0386±0.04 |          | 0.0026±0.01 |
| Benzyl-O-β-D-glucopyranose-β-D-xyranoside                  | Others     | 111550  | 24          | 78475    | 1           | 152500  | 25          | 234250   | 2           | 11078    | 83          |
|                                                            |            |         | 0.0553±0.03 |          | 0.248±0.152 |         | 0.0115±0.01 |          | 0.0107±0.00 |          | 0.0018±0.00 |
| Isothankunic acid                                          | Terpenoids | 236250  | 6           | 777000   | 9           | 39900   | 26          | 64950    | 78          | 7700     | 27          |
|                                                            |            |         | 0.0135±0.00 |          | 0.0491±0.02 |         | 0.0048±0.00 |          | 0.0021±0.00 |          | 0.0216±0.00 |
| Terminolic acid                                            | Terpenoids | 57700   | 53          | 153750   | 1           | 16625   | 58          | 12925    | 17          | 91375    | 49          |
|                                                            |            |         |             |          |             |         |             |          | 0.0597±0.04 |          |             |
| Corosolic acid                                             | Terpenoids | -       | -           | -        | -           | 1880000 | 0.541±0.083 | 361500   | 29          | -        | -           |
|                                                            |            |         | 0.0017±0.00 |          | 0.0067±0.00 |         |             |          |             |          | 0.0028±0.00 |
| Osthole                                                    | Coumarins  | 7198    | 15          | 20825    | 44          | -       | -           | 5855     | 0.001±0.001 | 11625    | 63          |
|                                                            |            |         |             |          |             |         | 0.0549±0.01 |          |             |          | 0.0019±0.00 |
| Luteolin-O-rutinoside-O-rhamnoside                         | Flavonoids | -       | -           | -        | -           | 190750  | 76          | -        | -           | 7888     | 6           |
|                                                            | Phenolic   |         | 0.0095±0.03 |          |             |         |             |          | 0.0034±0.00 |          | 0.0119±0.01 |
| Geraniin                                                   | acids      | 40475   | 45          | -        | -           | -       | -           | 20800    | 56          | 50275    | 55          |
|                                                            |            |         | 0.0114±0.02 |          |             |         |             |          |             |          |             |
| Methyl neochebulagate                                      | Others     | 48950   | 11          | -        | -           | -       | -           | -        | -           | -        | -           |
|                                                            | Phenolic   |         |             |          | 0.0173±0.01 |         | 0.1518±0.04 |          | 0.0076±0.01 |          | 0.0081±0.01 |
| 1,4-di-O-galloyl-β-D-glucose                               | acids      | -       | -           | 54150    | 77          | 527750  | 37          | 45900    | 59          | 34300    | 14          |
|                                                            |            |         | 1.7257±1.25 |          | 3.5684±0.82 |         | 1.359±0.304 |          | 1.911±0.264 |          | 2.7713±1.08 |
| pomolic acid                                               | Terpenoids | 7362500 | 65          | 11175000 | 33          | 4722500 | 9           | 11575000 | 2           | 11700000 | 73          |
|                                                            |            |         | 1.7133±0.74 |          | 3.5049±0.96 |         | 1.3161±0.46 |          | 1.9324±0.56 |          | 2.7823±0.51 |
| alphitolic acid                                            | Terpenoids | 7315000 | 95          | 10975000 | 39          | 4575000 | 83          | 11700000 | 06          | 11750000 | 12          |

|                                                                                        |            |         |             |         |             |        |             |         |             |         |             |
|----------------------------------------------------------------------------------------|------------|---------|-------------|---------|-------------|--------|-------------|---------|-------------|---------|-------------|
| 2α-hydroxyursolic acid                                                                 | Terpenoids | 332000  | 0.0778±0.04 | 573000  | 0.183±0.012 | 51925  | 0.0149±0.09 | 7710000 | 1.2732±0.32 | 589750  | 0.1396±0.03 |
|                                                                                        |            |         | 76          |         | 6           |        | 21          |         | 61          |         | 76          |
| isoceanothic acid                                                                      | Terpenoids | 2845000 | 0.6667±0.11 | 6472500 | 2.0672±0.44 | 134750 | 0.0388±0.01 | 1145000 | 0.1891±0.03 | 2412500 | 0.5712±0.09 |
|                                                                                        |            |         | 61          |         | 12          |        | 4           |         | 22          |         | 81          |
| 2α-hydroxypyracrenic acid                                                              | Terpenoids | 318000  | 0.0747±0.06 | 188750  | 0.0602±0.04 | 72025  | 0.0207±0.00 | 734500  | 0.1214±0.08 | 248000  | 0.0586±0.06 |
|                                                                                        |            |         | 59          |         | 69          |        | 81          |         | 26          |         | 9           |
|                                                                                        |            |         | 0.0136±0.00 |         | 0.0042±0.00 |        |             |         | 0.0023±0.00 |         |             |
| 5,7,3',4',5'-pentahydroxydihydroflavone                                                | Flavonoids | 58025   | 84          | 13150   | 83          | -      | -           | 13850   | 56          | -       | -           |
|                                                                                        |            |         | 0.0674±0.02 |         | 0.0542±0.28 |        | 0.0489±0.04 |         | 0.1599±0.10 |         | 1.5452±0.70 |
| Myricetin-O-rhamnoside                                                                 | Flavonoids | 288000  | 3           | 169000  | 38          | 170000 | 27          | 969000  | 23          | 6530000 | 95          |
|                                                                                        |            |         | 0.0239±0.01 |         | 0.069±0.083 |        | 0.0605±0.03 |         | 0.1246±0.17 |         | 0.1507±0.08 |
| Annuionone D                                                                           | Others     | 101925  | 1           | 216000  | 5           | 210250 | 64          | 755750  | 09          | 636500  | 24          |
|                                                                                        |            |         | 0.0761±0.05 |         | 0.0426±0.03 |        | 0.0425±0.03 |         | 0.0544±0.02 |         | 0.0381±0.04 |
| Taxifolin-3'-O-β-D-glucoside                                                           | Flavonoids | 325250  | 8           | 133250  | 9           | 147750 | 39          | 329000  | 92          | 160750  | 86          |
| 7S,8R-threo-3',9,9'-trihydroxy-3-methoxy-4',7-epoxy-neolignan-4-O-α-L-rhamnopyranoside | Lignans    | 9767500 | 2.2825±2.49 | 1765000 | 0.5639±0.27 | -      | -           | -       | -           | -       | -           |
|                                                                                        |            |         | 14          |         | 42          |        | -           |         | -           |         | -           |
|                                                                                        |            |         | 0.0051±0.00 |         | 0.0018±0.00 |        | 0.141±0.113 |         | 0.0509±0.04 |         |             |
| secoisolariciresinol 9-O-β-D-glucopyranoside                                           | Lignans    | 21950   | 37          | 5478    | 61          | 489500 | 7           | 308000  | 46          | -       | -           |
|                                                                                        |            |         | 0.0057±0.00 |         | 0.0023±0.00 |        | 0.0012±0.00 |         | 0.0032±0.00 |         | 0.0008±0.00 |
| Ligraminol E                                                                           | Others     | 24250   | 39          | 7250    | 17          | 4320   | 33          | 19225   | 05          | 3508    | 22          |
|                                                                                        |            |         | 0.0695±0.02 |         | 0.0177±0.02 |        | 0.0155±0.00 |         | 0.0746±0.02 |         | 0.0036±0.00 |
| 4,7,9,9'-Tetrahydroxy-3,3'-dimethoxy-8-O-4'-neolignan                                  | Others     | 296750  | 65          | 55350   | 16          | 53925  | 75          | 451750  | 82          | 15000   | 72          |
|                                                                                        |            |         | 0.002±0.002 |         | 0.0072±0.00 |        | 0.0027±0.00 |         | 0.0123±0.00 |         | 0.0119±0.04 |
| N-Benzylmethylene isomethylamine                                                       | Alkaloids  | 8440    | 1           | 22525   | 32          | 9265   | 21          | 74425   | 23          | 50575   | 09          |
| 2-Hydroxy-5,8,11,14,17-icosapentaenoyloxy]propyl-2-(trimethylammonio)ethyl phosphate   | Alkaloids  | 1532500 | 0.3589±0.15 | 2290000 | 0.731±0.327 |        | 0.0851±0.02 |         | 0.1644±0.04 |         | 0.4316±0.08 |
|                                                                                        | Phenolic   |         | 84          |         | 4           | 295500 | 6           | 995750  | 34          | 1822500 | 3           |
|                                                                                        | acids      |         | 0.0594±0.03 |         |             |        |             |         | 0.0033±0.00 |         |             |
| monogalloyl-diglucose                                                                  |            | 253750  | 89          | -       | -           | -      | -           | 19725   | 47          | -       | -           |
|                                                                                        |            |         | 0.3692±0.31 |         | 0.219±0.085 |        | 0.2368±0.06 |         | 0.0736±0.06 |         | 0.0039±0.00 |
| Epicatechin glucoside                                                                  | Flavonoids | 1572500 | 58          | 685500  | 4           | 823000 | 41          | 446250  | 78          | 16425   | 71          |
|                                                                                        |            |         | 0.0175±0.00 |         | 0.038±0.011 |        | 0.0073±0.00 |         | 0.0008±0.00 |         |             |
| (2R)-Pinocembrin-7-neohesperidoside                                                    | Flavonoids | 74525   | 56          | 119000  | 6           | 25275  | 23          | 4560    | 24          | -       | -           |
|                                                                                        | Phenolic   |         | 0.0022±0.00 |         | 0.001±0.003 |        | 0.0007±0.00 |         | 0.0007±0.00 |         | 0.0271±0.01 |
| Caffeoylferuloylshikimic?acid                                                          | acids      | 9225    | 26          | 3068    | 7           | 2373   | 08          | 4408    | 14          | 114500  | 23          |
|                                                                                        |            |         | 0.0059±0.00 |         | 0.0267±0.01 |        |             |         | 0.0019±0.00 |         | 0.0064±0.01 |
| Scopoletin?Beta-D-Glucuronide                                                          | Coumarins  | 25100   | 41          | 83575   | 23          | -      | -           | 11755   | 43          | 26800   | 07          |
|                                                                                        |            |         | 0.0443±0.07 |         | 0.0179±0.02 |        | 0.0422±0.03 |         | 0.0401±0.04 |         | 0.0537±0.07 |
| Dihydrokaempferol-3-O-β-D-glucoside                                                    | Flavonoids | 189750  | 65          | 56075   | 41          | 146500 | 27          | 242750  | 31          | 227000  | 79          |
|                                                                                        | Phenolic   |         | 0.6586±0.34 |         | 0.6184±0.43 |        | 0.0155±0.01 |         |             |         |             |
| Salireposide                                                                           | acids      | 2810000 | 09          | 1937500 | 54          | 53925  | 48          | -       | -           | -       | -           |
|                                                                                        |            |         | 0.0139±0.00 |         | 0.0256±0.00 |        | 0.013±0.007 |         | 0.0282±0.00 |         | 0.0056±0.00 |
| Chrysin-7-glucoside                                                                    | Flavonoids | 59500   | 54          | 80050   | 96          | 45225  | 6           | 170500  | 85          | 23625   | 41          |



|                                                     |         |         |                   |        |                   |           |                  |         |                   |        |                   |
|-----------------------------------------------------|---------|---------|-------------------|--------|-------------------|-----------|------------------|---------|-------------------|--------|-------------------|
| Isolariciresinol 9'-O-Glucoside                     | Lignans | 504000  | 0.1181±0.03<br>21 | 205750 | 0.0657±0.03<br>49 | 534750    | 0.1539±0.02<br>8 | 1760000 | 0.2907±0.10<br>32 | 534250 | 0.1263±0.10<br>59 |
| 5'-methoxyisolariciresinol-9'-O-β-D-xylopyranoside  | Lignans | 73875   | 0.0173±0.01<br>41 | 16025  | 0.0051±0.00<br>97 | -         | -                | -       | -                 | -      | -                 |
| Iyoniresinol-9'-O-β-D-xylopyranoside                | Lignans | 863500  | 0.2024±0.15<br>73 | 259500 | 0.0829±0.01<br>66 | -         | -                | 86600   | 0.0143±0.00<br>36 | -      | -                 |
| 5'-methoxyisolariciresinol-9'-O-β-D-glucopyranoside | Lignans | 65550   | 0.0154±0.01<br>39 | 31950  | 0.0102±0.01<br>64 | 142750    | 0.041±0.032      | 231000  | 0.0382±0.00<br>97 | 166500 | 0.0394±0.04<br>39 |
| Machilusolide D                                     | Others  | 361000  | 0.0846±0.04<br>94 | 186500 | 0.0596±0.03<br>65 | 203500.00 | 0.0585±0.03      | 492000  | 0.0832±0.05<br>89 | 650667 | 0.1538±0.03<br>65 |
| Byzantionoside A                                    | Others  | 1455000 | 0.3417±0.29<br>52 | 440000 | 0.1407±0.19<br>86 | 79150.000 | 0.0228±0.04      | 277667  | 0.0455±0.02<br>28 | 38233  | 0.0093±0.01<br>28 |

**Table S5.** Potential markers and corresponding activities of five *Rosa* fruits.

| NO. | Tentative identification                            | Class          | Sub class            | Pharmacological activity                                                                                               | Containing or not |       |       |       |       |
|-----|-----------------------------------------------------|----------------|----------------------|------------------------------------------------------------------------------------------------------------------------|-------------------|-------|-------|-------|-------|
|     |                                                     |                |                      |                                                                                                                        | RRT-F             | RSS-F | RLM-F | RDP-F | RSL-F |
| 1   | Biochanin A                                         | Flavonoids     | Isoflavones          | Fatty acid amide hydrolase (FAAH) inhibitor [1].                                                                       |                   |       |       | √     |       |
| 2   | Delphinidin 3-O-glucoside (Mirtillin)               | Flavonoids     | Anthocyanins         | -                                                                                                                      | √                 |       |       |       |       |
| 3   | Epicatechin gallate (ECG)                           | Flavonoids     | Flavanols            | Inhibit cyclooxygenase-1 [2].                                                                                          |                   |       |       | √     |       |
| 4   | Genistein 7-O-Glucoside (Genistin)                  | Flavonoids     | Isoflavones          | Promote apoptosis of breast cancer cells [3];<br>Anti-adipogenic activity [4].                                         |                   |       | √     |       |       |
| 5   | Naringenin chalcone                                 | Flavonoids     | Flavanones           | Anti-inflammatory and antiallergic activities [5].                                                                     |                   |       |       | √     |       |
| 6   | Quercetin 4'-O-glucoside (Spiraeoside)              | Flavonoids     | Flavonols            | Antiallergic, anti-inflammatory and antitumor activities [6].                                                          |                   |       |       |       | √     |
| 7   | Quercetin 7-O-β-D-Glucuronide                       | Flavonoids     | Flavonols            | Modulate the LDL oxidation [7].                                                                                        |                   |       |       |       | √     |
| 8   | 5-O-p-Coumaroyl shikimic acid                       | Phenolic acids | Hydroxycyclic acids  | -                                                                                                                      | √                 |       |       |       |       |
| 9   | Ethyl 3,4-Dihydroxybenzoate (Ethyl protocatechuate) | Phenolic acids | Hydroxybenzoic acids | Inhibits prolyl-hydroxylase and induces cell autophagy and apoptosis in ESCC cells [8];<br>Bone protecting-effect [9]. |                   |       |       | √     |       |
| 10  | 1-O-Feruloyl quinic acid                            | Phenolic acids | Hydroxycyclic acids  | -                                                                                                                      |                   | √     |       |       |       |
| 11  | Catechin gallate                                    | Phenolic acids | Hydroxybenzoic acids | Inhibit the activity of COX-1 and COX-2 enzymes [10].                                                                  |                   |       |       | √     |       |
| 12  | Formononetin                                        | Flavonoids     | Isoflavones          | Inhibits FGFR2, angiogenesis and tumor growth in preclinical models [11].                                              |                   |       |       |       | √     |

|    |                                         |                |                      |                                                                                                 |   |   |   |
|----|-----------------------------------------|----------------|----------------------|-------------------------------------------------------------------------------------------------|---|---|---|
| 13 | 7-O-Methyleriodictyol                   | Flavonoids     | Flavanols            | A flavanone phytoalexin associated with disease resistance in rice plants [12].                 | √ |   |   |
| 14 | Cannabiscitrin                          | Others         | Others               | -                                                                                               |   |   | √ |
| 15 | O-Phosphocholine                        | Alkaloids      | Alkaloids            | -                                                                                               | √ |   |   |
| 16 | Citramalate                             | Organic acids  | Organic acids        | -                                                                                               |   | √ |   |
| 17 | (±)-jasmonic acid                       | Organic acids  | Organic acids        | -                                                                                               | √ |   |   |
| 18 | Methyl jasmonate                        | Organic acids  | Organic acids        | Enhance secondary metabolites and antioxidant activity [13].                                    | √ |   |   |
| 19 | Sweroside                               | Terpenoids     | monoterpenes         | Cytoprotective and anti-osteoporotic [14]; hepatoprotective effect [15].                        |   |   | √ |
| 20 | Phlorizin                               | Flavonoids     | Chalcones            | Antioxidant properties [16];<br>Non-selective SGLT inhibitor [17].                              |   |   | √ |
| 21 | Eriodictyol 7-O-glucoside               | Flavonoids     | Flavanones           | Nrf2 activator [18].                                                                            |   |   | √ |
| 22 | Pinobanksin                             | Flavonoids     | Flavanols            | Apoptotic induction in a B-cell lymphoma cell line [19];<br>Antiangiogenic effect [20].         |   |   | √ |
| 23 | 4-Hydroxybenzaldehyde                   | Phenolic acids | Hydroxybenzoic acids | -                                                                                               |   |   | √ |
| 24 | Cinnamic acid                           | Phenolic acids | Hydroxycyclic acids  | Anticancer effects in vitro and antibacterial activity [21].                                    | √ |   |   |
| 25 | Riboprine                               | Phenolic acids | HAs                  | An autophagy inhibitor with anti-melanoma activity [22].                                        |   |   | √ |
| 26 | Sinapinaldehyde                         | Phenolic acids | Hydroxycyclic acids  | -                                                                                               |   |   | √ |
| 27 | Brevifolin carboxylic acid              | Phenolic acids | Hydroxybenzoic acids | -                                                                                               | √ |   |   |
| 28 | 5-Galloylshikimic acid                  | Phenolic acids | Hydroxybenzoic acids | -                                                                                               | √ |   |   |
| 29 | 3-Galloylshikimic acid                  | Phenolic acids | Hydroxybenzoic acids | -                                                                                               | √ |   |   |
| 30 | Trihydroxycinnamoylquinic acid          | Phenolic acids | Hydroxycyclic acids  | -                                                                                               |   |   | √ |
| 31 | 1,6-Di-O-Galloyl-D-Glucose              | Phenolic acids | Hydroxybenzoic acids | Inhibitor of trypanosomal phosphofructokinase [23].                                             |   | √ |   |
| 32 | Apigenin 7-O-glucoside(Cosmosiin)       | Flavonoids     | Flavones             | Anti-proliferative and antioxidant activity [24];<br>Scavenge reactive oxygen species [25].     |   | √ |   |
| 33 | Apigenin 5-O-glucoside                  | Flavonoids     | Flavones             | Anti-inflammatory activity [26].                                                                |   | √ |   |
| 34 | Tetahydroxy-flavone-7-O-β-D-glucuronide | Flavonoids     | Flavones             | -                                                                                               |   | √ |   |
| 35 | Luteolin-O-sinapoylhexoside             | Flavonoids     | Flavones             | -                                                                                               | √ |   |   |
| 36 | Myricetin                               | Flavonoids     | Flavanols            | Anti-oxidant activity [27];<br>Anti-cancer activity [28];<br>Anti-inflammatory activities [29]. |   | √ |   |
| 37 | Kaempferol-3-O-rutinoside(Nicotiflorin) | Flavonoids     | Flavanols            | Play a pharmacological role in VEGF-C-mediated anti-inflammation [30].                          |   | √ |   |
| 38 | Kaempferol-3-O-robinobioside(Biorobin)  | Flavonoids     | Flavanols            | Inhibit the human lymphocyte proliferation in vitro [31].                                       |   | √ |   |



|    |                                                    |                |                      |                                                                                                                                                 |   |   |   |   |   |
|----|----------------------------------------------------|----------------|----------------------|-------------------------------------------------------------------------------------------------------------------------------------------------|---|---|---|---|---|
| 39 | Kaempferol-3-O-glucoside-7-O-rhamnoside            | Flavonoids     | Flavonols            | -                                                                                                                                               |   |   | √ |   |   |
| 40 | Isorhamnetin-3-O-rutinoside (Narcissin)            | Flavonoids     | Flavonols            | Antioxidant activity [32].                                                                                                                      |   |   | √ |   |   |
| 41 | 6-Hydroxykaempferol-3,6-O-Diglucoside              | Flavonoids     | Flavonols            | Antioxidant and anticancer activities [33].                                                                                                     |   |   |   | √ |   |
| 42 | Robinin(Kaempferol-3-O-gal-rham-7-O-rham)          | Flavonoids     | Flavonols            | Ameliorate oxidized low-density lipoprotein induced inflammatory [34];<br>Improve the reduction of inflammation in experimental arthritis [35]. |   |   | √ |   |   |
| 43 | 1-Methylhistamine                                  | Others         | Others               | -                                                                                                                                               |   |   |   |   | √ |
| 44 | 4-Methyl-5-thiazoleethanol                         | Others         | Others               | -                                                                                                                                               |   |   | √ |   |   |
| 45 | Ethyl gallate                                      | Phenolic acids | Hydroxybenzoic acids | Scavenger of hydrogen peroxide; Induce apoptosis in HL-60 cell [36].                                                                            |   |   |   | √ |   |
| 46 | Ursolic acid                                       | Terpenoids     | triterpenoids        | Resist cancer cells [37];<br>Decreases the serum levels of tumor necrosis factor- $\alpha$ , interleukin-6, and interleukin-1 $\beta$ [38].     |   |   |   | √ |   |
| 47 | Methoxyursolic acid                                | Terpenoids     | triterpenoids        | -                                                                                                                                               |   |   |   |   | √ |
| 48 | Pyridoxine                                         | Vitamins       | Vitamins             | Antioxidant effects in cell model of Alzheimer's disease [39].                                                                                  | √ |   |   |   |   |
| 49 | Riboflavin                                         | Vitamins       | Vitamins             | Antinociceptive activity [40];<br>Ameliorates cognitive impairment [41].                                                                        |   |   | √ |   |   |
| 50 | Prunetin                                           | Flavonoids     | Isoflavones          | Anti-inflammatory activity [42];<br>A potent human aldehyde dehydrogenases inhibitor [43].                                                      |   |   |   | √ |   |
| 51 | $\gamma$ -Aminobutyric acid                        | Organic acids  | Organic acids        | Calming effect by blocking specific signals of central nervous system [44].                                                                     |   | √ |   |   |   |
| 52 | Citraconic acid                                    | Organic acids  | Organic acids        | Human endogenous metabolite [45].                                                                                                               | √ |   |   |   |   |
| 53 | 4-Acetamidobutyric acid                            | Organic acids  | Organic acids        | Exhibit potential for early diabetic kidney disease diagnosis [46].                                                                             |   |   |   | √ |   |
| 54 | L-(+)-Tartaric acid                                | Organic acids  | Organic acids        | Antihyperglycemic and antidyslipidemic effects [47].                                                                                            |   |   |   | √ |   |
| 55 | SubericAcid                                        | Organic acids  | Organic acids        | -                                                                                                                                               |   |   |   |   | √ |
| 56 | Anchoic acid                                       | Organic acids  | Organic acids        | -                                                                                                                                               |   |   |   |   | √ |
| 57 | 6-hydroxy-5,7,4'-trimethoxyflavone                 | Flavonoids     | Flavones             | -                                                                                                                                               |   |   |   | √ |   |
| 58 | Tetramethyluteolin (3',4',5,7-Tetramethoxyflavone) | Flavonoids     | Flavones             | -                                                                                                                                               |   | √ |   |   |   |
| 59 | Kaempferol-3-O- $\beta$ -D-glucuronide             | Flavonoids     | Flavonols            | Inhibit pro-inflammatory mediators like IL-1 $\beta$ , NO, PGE2, and LTB4 [48].                                                                 |   |   | √ |   |   |
| 60 | Tercatain                                          | Phenolic acids | Hydroxybenzoic acids | -                                                                                                                                               | √ |   |   |   |   |
| 61 | benzoylmalic acid                                  | Phenolic acids | Hydroxybenzoic acids | -                                                                                                                                               | √ |   |   |   |   |
| 62 | feruloylmalic acid                                 | Phenolic acids | Hydroxycyclic acids  | -                                                                                                                                               |   |   |   |   | √ |

|    |                                                      |                |                      |                                                                                                                                                                                  |   |   |   |   |   |
|----|------------------------------------------------------|----------------|----------------------|----------------------------------------------------------------------------------------------------------------------------------------------------------------------------------|---|---|---|---|---|
| 63 | feruloylsinapoyltartaric acid                        | Phenolic acids | Hydroxycyclic acids  | -                                                                                                                                                                                |   |   |   |   | √ |
| 64 | Galloyl-HHDP(Hexahydroxydiphenoyl)-glucose           | Phenolic acids | Hydroxybenzoic acids | -                                                                                                                                                                                |   | √ |   |   |   |
| 65 | Angelicin                                            | Coumarins      | Coumarins            | Anti-cancer activity [49];<br>Antiviral activity [50];<br>Anti-inflammatory activity [51].                                                                                       |   |   |   | √ |   |
| 66 | 2'-Hydroxy,5-methoxy Genistein-O-rhamnosyl-glucoside | Flavonoids     | Isoflavones          | -                                                                                                                                                                                |   |   |   | √ |   |
| 67 | Farrerol 7-O-glucoside                               | Flavonoids     | Flavanones           | -                                                                                                                                                                                | √ |   |   |   |   |
| 68 | Eucommia                                             | Others         | Others               | -                                                                                                                                                                                |   |   |   |   | √ |
| 69 | Luteolin-7-O-β-D-gentiobioside                       | Flavonoids     | Flavones             | -                                                                                                                                                                                |   |   |   |   | √ |
| 70 | Vanillic acid glycoside                              | Phenolic acids | Hydroxybenzoic acids | -                                                                                                                                                                                |   |   |   |   | √ |
| 71 | Kaempferol-3-O-(6''-acetyl)-glucoside                | Flavonoids     | Flavonols            | -                                                                                                                                                                                |   |   |   | √ |   |
| 72 | Sexangularetin 3-glucoside-7-rhamnoside              | Flavonoids     | Flavonols            | -                                                                                                                                                                                |   |   |   | √ |   |
| 73 | Limocitrin 7-glucoside                               | Flavonoids     | Flavonols            | -                                                                                                                                                                                |   |   | √ |   |   |
| 74 | Dihydrosedinine                                      | Alkaloids      | Alkaloids            | -                                                                                                                                                                                |   |   |   | √ |   |
| 75 | Santamarin                                           | Terpenoids     | sesquiterpenes       | -                                                                                                                                                                                |   |   |   | √ |   |
| 76 | Ixerin D                                             | Terpenoids     | diterpenes           | -                                                                                                                                                                                | √ |   |   |   |   |
| 77 | Silibinin                                            | Flavonoids     | Flavanols            | Apoptosis, hepatoprotective, antioxidant, anti-inflammatory and anti-cancer activity[52, 53].                                                                                    |   |   |   | √ |   |
| 78 | Scutellarin(Scutellarein-7-O-glucuronide)            | Flavonoids     | Flavones             | Work against HIV-1IIB, HIV-1(74V) and HIV-1KM018 [54];<br>Inhibit RANKL-mediated MAPK and NF-κB signaling pathway, including JNK1/2, p38, ERK1/2, and IκBα phosphorylation [55]. |   |   |   |   | √ |
| 79 | Pratensein 7-O-glucopyranoside                       | Flavonoids     | Flavones             | -                                                                                                                                                                                |   | √ |   |   |   |
| 80 | Diosmetin-7-O-glucuronide                            | Flavonoids     | Flavones             | -                                                                                                                                                                                |   | √ |   |   |   |
| 81 | Patuletin-3-O-β-D-glucopyranoside                    | Flavonoids     | Flavones             | Therapeutic potential against oxidative stress-related and inflammatory disorders [56].                                                                                          |   | √ |   |   |   |
| 82 | Luteolin-7-O-rutinoside                              | Flavonoids     | Flavones             | Reduce the release of TNF-alpha, IL-6, and IL-1 beta; Inhibit PI3K/AKT/AMPK/NF-kappa B pathway, and reduce oxidative stress [57].                                                |   |   |   |   | √ |

|     |                                                            |                |                      |                                                                          |   |   |   |   |   |
|-----|------------------------------------------------------------|----------------|----------------------|--------------------------------------------------------------------------|---|---|---|---|---|
| 83  | 5,2'-Dihydroxy-7,8-dimethoxyflavone glycosides             | Flavonoids     | Flavones             | -                                                                        |   |   |   | √ |   |
| 84  | 3-O-Digalloyl quinic acid                                  | Phenolic acids | Hydroxybenzoic acids | -                                                                        |   |   | √ |   |   |
| 85  | Di-O-Glucose-quinic acid                                   | Phenolic acids | HAs                  | -                                                                        | √ |   |   |   |   |
| 86  | Gemin D                                                    | Phenolic acids | Hydroxybenzoic acids | Antioxidant and antitumoral activities [58].                             | √ |   |   |   |   |
| 87  | Nobotanin D                                                | Phenolic acids | Hydroxybenzoic acids | Antioxidant and antiglycation activities [59].                           | √ |   |   |   |   |
| 88  | Cuspinin                                                   | Phenolic acids | Hydroxybenzoic acids | -                                                                        | √ |   |   |   |   |
| 89  | Ailanindole                                                | Alkaloids      | Alkaloids            | -                                                                        |   |   |   | √ |   |
| 90  | Ayapin                                                     | Coumarins      | Coumarins            | -                                                                        |   |   |   |   | √ |
| 91  | Tubuloside C                                               | Phenolic acids | Hydroxycyclic acids  | -                                                                        |   |   | √ |   |   |
| 92  | Sinapaldehyde Glucoside                                    | Phenolic acids | Hydroxycyclic acids  | -                                                                        |   | √ |   |   |   |
| 93  | Maplexin C (2,3-Di-O-Galloyl-1,5-Anhydro-D-Glucitol)       | Phenolic acids | Hydroxybenzoic acids | Anticancer in vitro and antiproliferative effects [60].                  | √ |   |   |   |   |
| 94  | 2,3-Di-O-Galloyl-D-Glucose                                 | Phenolic acids | Hydroxybenzoic acids | -                                                                        |   |   |   | √ |   |
| 95  | Methyl 4,6-di-O-galloyl-D-glucoside                        | Phenolic acids | Hydroxybenzoic acids | -                                                                        | √ |   |   |   |   |
| 96  | Geniposide                                                 | Terpenoids     | monoterpenes         | Anti-diabetic; Reduces oxidative stress, inflammation and fibrosis [61]. |   |   |   | √ |   |
| 97  | Quercetin-3-sambubioside                                   | Flavonoids     | Flavonols            | -                                                                        |   |   |   |   | √ |
| 98  | Syringic Aldehyde-glucoside                                | Phenolic acids | Hydroxybenzoic acids | -                                                                        |   |   | √ |   |   |
| 99  | 1'-O-vanilloyl-β-D-glucoside                               | Phenolic acids | Hydroxybenzoic acids | -                                                                        |   |   |   | √ |   |
| 100 | 3-Prenyl-4-O-β-D-glucopyranosyloxy-4-hydroxyl-benzoic acid | Phenolic acids | Hydroxybenzoic acids | -                                                                        |   |   | √ |   |   |
| 101 | Quercetin-O-pentosyl-O-rhamnoside-O-glucoside              | Flavonoids     | Flavonols            | -                                                                        |   |   |   |   | √ |
| 102 | dihydrodehydrodiconiferyl alcohol 4-O-β-D-glucopyranosides | Lignans        | Lignans              | -                                                                        |   |   |   | √ |   |
| 103 | (-)-secoisolariciresinol 4-O-β-D-glucopyranoside           | Lignans        | Lignans              | -                                                                        |   |   | √ |   |   |
| 104 | p-Coumaroyleuscaphic acid                                  | Terpenoids     | triterpenoids        | -                                                                        |   |   | √ |   |   |
| 105 | 3-Indoleacrylic acid                                       | Alkaloids      | Alkaloids            | -                                                                        |   |   |   | √ |   |
| 106 | Kaempferol 3-O-β-D-neohesperidoside                        | Flavonoids     | Flavonols            | Insulinomimetic effect on the rat soleus muscle [62].                    |   |   | √ |   |   |
| 107 | Quercetin 3-O-β-D-xylopyranosyl(1→2)-β-D-galactopyranoside | Flavonoids     | Flavonols            | -                                                                        |   |   |   |   | √ |

|     |                                                                                        |                |                      |                                                                                                 |   |   |   |   |   |
|-----|----------------------------------------------------------------------------------------|----------------|----------------------|-------------------------------------------------------------------------------------------------|---|---|---|---|---|
| 108 | Corosolic acid                                                                         | Terpenoids     | triterpenoids        | Kinase C inhibitor [63];<br>Anti-angiogenic, anti-lymphangiogenic and anti-cancer effects [64]. |   |   |   | √ |   |
| 109 | Luteolin-O-rutinoside-O-rhamnoside                                                     | Flavonoids     | Flavones             | -                                                                                               |   |   |   | √ |   |
| 110 | Methyl neochebulagate                                                                  | Others         | Others               | Cytotoxic activities to HL60 cell line [65].                                                    | √ |   |   |   |   |
| 111 | 1,4-di-O-galloyl-β-D-glucose                                                           | Phenolic acids | Hydroxybenzoic acids | -                                                                                               |   |   |   | √ |   |
| 112 | 2α-hydroxyursolic acid                                                                 | Terpenoids     | triterpenoids        | Induce non-apoptotic cell death in cancer cells [66].                                           |   |   |   |   | √ |
| 113 | 5,7,3',4',5'-pentahydroxydihydroflavone                                                | Flavonoids     | Flavanones           | -                                                                                               | √ |   |   |   |   |
| 114 | Myricetin-O-rhamnoside                                                                 | Flavonoids     | Flavonols            | DPPH free radical scavenging activity [67].                                                     |   |   |   |   | √ |
| 115 | 7S,8R-threo-3',9,9'-trihydroxy-3-methoxy-4',7-epoxy-neolignan-4-O-α-L-rhamnopyranoside | Lignans        | Lignans              | -                                                                                               |   | √ |   |   |   |
| 116 | monogalloyl-diglucose                                                                  | Phenolic acids | Hydroxybenzoic acids | -                                                                                               | √ |   |   |   |   |
| 117 | Caffeoyl feruloyl shikimic acid                                                        | Phenolic acids | Hydroxycyclic acids  | -                                                                                               |   |   |   |   | √ |
| 118 | Scopoletin-Beta-D-Glucuronide                                                          | Coumarins      | Coumarins            | -                                                                                               |   |   | √ |   |   |
| 119 | Galangin-7-glucoside                                                                   | Flavonoids     | Flavones             | -                                                                                               |   |   |   | √ |   |
| 120 | Luteolin-O-glucuronate-O-rhamnoside                                                    | Flavonoids     | Flavones             | -                                                                                               |   |   |   | √ |   |
| 121 | Dunalianoside C                                                                        | Phenolic acids | Hydroxycyclic acids  | -                                                                                               |   |   |   |   | √ |
| 122 | 5,7,8,4'-Tetramethoxyflavone                                                           | Flavonoids     | Flavones             | -                                                                                               | √ |   |   |   |   |
| 123 | Luteolin 7-O-neohesperidoside(Lonicerin)                                               | Flavonoids     | Flavones             | Prevent inflammation [68];<br>Apoptosis in LPS-induced acute lung injury [69].                  |   |   |   | √ |   |
| 124 | Isolariciresinol 9'-O-Glucoside                                                        | Lignans        | Lignans              | -                                                                                               |   |   |   |   | √ |
| 125 | 5'-methoxyisolariciresinol-9'-O-β-D-xylopyranoside                                     | Lignans        | Lignans              | -                                                                                               | √ |   |   |   |   |

## References

- Thors, L.; Burston, J.J.; Alter, B.J.; McKinney, M.K.; Cravatt, B.F.; Ross, R.A.; Pertwee, R.G.; Gereau, R.W.; Wiley, J.L.; Fowler, C.J. Biochanin A, a naturally occurring inhibitor of fatty acid amide hydrolase. *Brit. J. Pharmacol.* **2010**, *160*(3), 549-560. doi: <https://doi.org/10.1111/j.1476-5381.2010.00716.x>
- Waffo-Teguo, P.; Hawthorne, M.E.; Cuendet, M.; Merillon, J.M.; Kinghorn, A.D.; Pezzuto, J.M.; Mehta, R.G. Potential cancer-chemopreventive activities of wine stilbenoids and flavans extracted from grape (*Vitis vinifera*) cell cultures. *Nutr. Cancer.* **2001**, *40*(2), 173-179.doi: 10.1207/S15327914NC402\_14
- Hwang, S.T.; Yang, M.H.; Baek, S.H.; Um, J.; Ahn, K.S. Genistin attenuates cellular growth and promotes apoptotic cell death breast cancer cells through modulation of ERalpha signaling pathway. *Life Sci.* **2020**, *263*, 118594. doi:





10.1016/j.biopha.2019.109721

54. Zhang, G.H.; Wang, Q.; Chen, J.J.; Zhang, X.M.; Tam, S.C.; Zheng, Y.T. The anti-HIV-1 effect of scutellarin. *Biochem. Bioph. Res. Co.* **2005**, *334*(3), 812-816. doi: 10.1016/j.bbrc.2005.06.166

55. Zhao, S.; Sun, Y.; Li, X.L.; Wang, J.C.; Yan, L.Q.; Zhang, Z.; Wang, D.X.; Dai, J.H.; He, J.; Wang, S. G. Scutellarin inhibits RANKL-mediated osteoclastogenesis and titanium particle-induced osteolysis via suppression of NF- $\kappa$ B and MAPK signaling pathway. *Int. Immunopharmacol.* **2016**, *40*, 458-465. doi: 10.1016/j.intimp.2016.09.031

56. Corrêa, W.R.; Serain, A.F.; Netto, L.A.; Marinho, J.V.N.; Arena, A.C.; Aquino, D.F.D.S.; Oliveira, A.M.K.; Júnior, A.J.; Bernal, L.P.T.; Kassuya, C.A.L.; Salvador, M. J. Anti-inflammatory and antioxidant properties of the extract, tiliroside, and patuletin 3-o- $\beta$ -d-glucopyranoside from *Pfaffia townsendii* (Amaranthaceae). *Evid-Based. Compl. Alt.* **2018**, *2018*, 6057579. doi: 10.1155/2018/6057579

57. Xiong, Z.W.; Cui, Y.S.; Wu, J.H.; Shi, L.Y.; Wen, Q.; Yang, S.L.; Feng, Y.L. Luteolin-7-O-rutinoside from *Pteris cretica* L. var. *nervosa* attenuates LPS/D-gal-induced acute liver injury by inhibiting PI3K/AKT/AMPK/NF-kappa B signaling pathway. *N-S. Arch. Pharmacol.* **2022**, *395*(10), 1283-1295. doi: 10.1007/s00210-022-02266-8

58. Carneiro, C.C.; Moraes, A.V.; Fernandes, A.S.; Santos, S.D.; Silva, D.; Chen, L.C. Cytotoxic and chemopreventive effects of Gemin D against different mutagens using *in vitro* and *in vivo* assays. *Anti-Cancer Agent. Me.* **2017**, *17*(5), 712-718. doi: 10.2174/1871520616666160906092502

59. Yasuda, M.; Ikeoka, M.; Kondo, S.I. Skin-related enzyme inhibitory activity by hydrolyzable polyphenols in water chestnut (*Trapa natans*) husk. *Biosci. Biotech. Bioch.* **2021**, *85*(3), 666-674. doi: 10.1093/bbb/zbaa076

60. González-Sarriás, A.; Yuan, T.; Seeram, N.P. Cytotoxicity and structure activity relationship studies of maplexins A–I, gallotannins from red maple (*Acer rubrum*). *Food Chem. Toxicol.* **2012**, *50*(5), 1369-1376. doi: <https://doi.org/10.1016/j.fct.2012.02.031>

61. Dusabimana, T.; Park, E.J.; Je, J.; Jeong, K.; Yun, S.P.; Kim, H.J.; Kim, H.; Park, S.W. Geniposide improves diabetic nephropathy by enhancing ulk1-mediated autophagy and reducing oxidative stress through ampk activation. *Int. J. Mol. Sci.* **2021**, *22*(4), 1651. doi: 10.3390/ijms22041651

62. Zanatta, L.; Rosso, A.; Folador, P.; Figueiredo, M.S.; Pizzolatti, M.G.; Leite, L.D.; Silva, F.R. Insulinomimetic effect of kaempferol 3-neohesperidoside on the rat soleus muscle. *J. Nat. Prod.* **2008**, *71*(4), 532–535. <https://doi.org/10.1021/np070358+>

63. Ahn, K.S.; Hahm, M.S.; Park, E.J.; Lee, H.K.; Kim, I.H. Corosolic acid isolated from the fruit of *Crataegus pinnatifida* var. *psilosa* is a protein kinase C inhibitor as well as a cytotoxic agent. *Planta Med.* **1998**, *64*(5), 468-470. doi: 10.1055/s-2006-957487

64. Yoo, K.H.; Park, J.; Lee, D.Y.; Hwang-Bo, J.; Baek, N.I.; Chung, I.S. Corosolic acid exhibits anti-angiogenic and anti-lymphangiogenic effects on *in vitro* endothelial cells and on an *in vivo* ct-26 colon carcinoma animal model. *Phytotherapy Res.* **2015**, *29*(5), 714-723. doi: <https://doi.org/10.1002/ptr.5306>

65. Manosroi, A.; Jantrawut, P.; Ogihara, E.; Yamamoto, A.; Fukatsu, M.; Yasukawa, K.; Tokuda, H.; Suzuki, N.; Manosroi, J.; Akihisa, T. Biological activities of phenolic compounds and triterpenoids from the galls of *Terminalia chebula*. *Chem. Biodivers.* **2013**, *10*(8), 1448-1463. doi: 10.1002/cbdv.201300149

66. Woo, S.M.; Seo, S.U.; Min, K.-j.; Im, S.-S.; Nam, J.-O.; Chang, J.-S.; Kim, S.; Park, J.-W.; Kwon, T.K. Corosolic acid induces non-apoptotic cell death through generation of lipid reactive oxygen species production in human renal carcinoma caki cells. *Int. J. Mol. Sci.* **2018**, *19*(5), 1309. doi: 10.3390/ijms19051309

67. Bouziane, A.; Bakchiche, B.; Dias, M.I.; Barros, L.; Ferreira, I.C.F.R.; AlSalamat, H.A.; Bardaweel, S.K. Phenolic compounds and bioactivity of *cytisus villosus* pourr. *Molecules.* **2018**, *23*(8). doi: 10.3390/molecules23081994

68. Xu, Z.R.; Li, K.; Pan, T.W.; Liu, J.; Li, B.; Li, C.X.; Wang, S.Y.; Diao, Y.P.; Liu, X.G. Lonicerin, an anti-algE flavonoid against *Pseudomonas aeruginosa* virulence screened from Shuanghuanglian formula by molecule docking based strategy. *Journal of Ethnopharmacology.* **2019**, *239*, 111909. doi: <https://doi.org/10.1016/j.jep.2019.111909>

69. Gu, L.Z.; Sun, H. Lonicerin prevents inflammation and apoptosis in LPS-induced acute lung injury. *Front. Biosci-Landmrk.* **2020**, *25*, 480-497. doi: 10.2741/4815

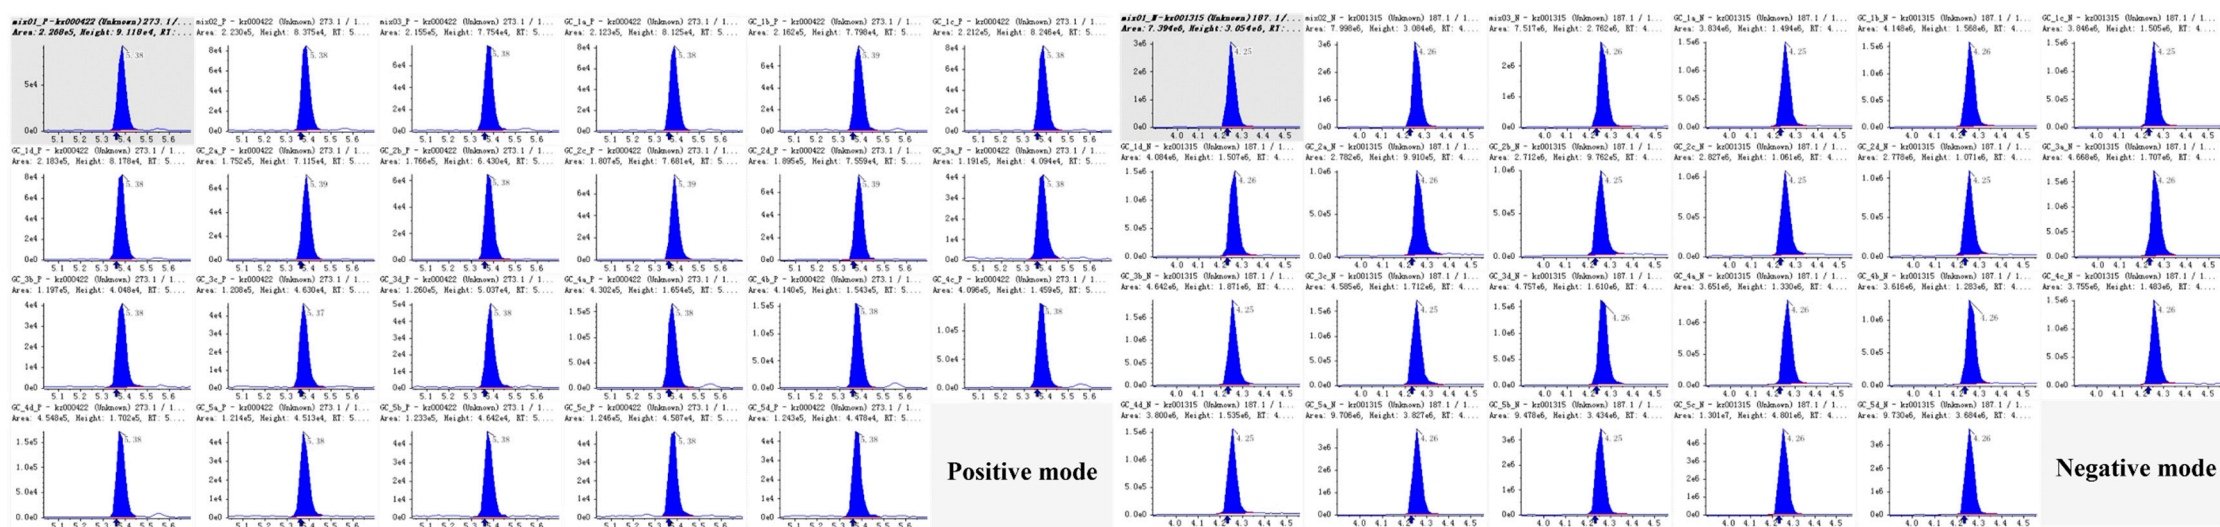

Figure S1. Integrated correction chart for metabolite quantitative analysis.

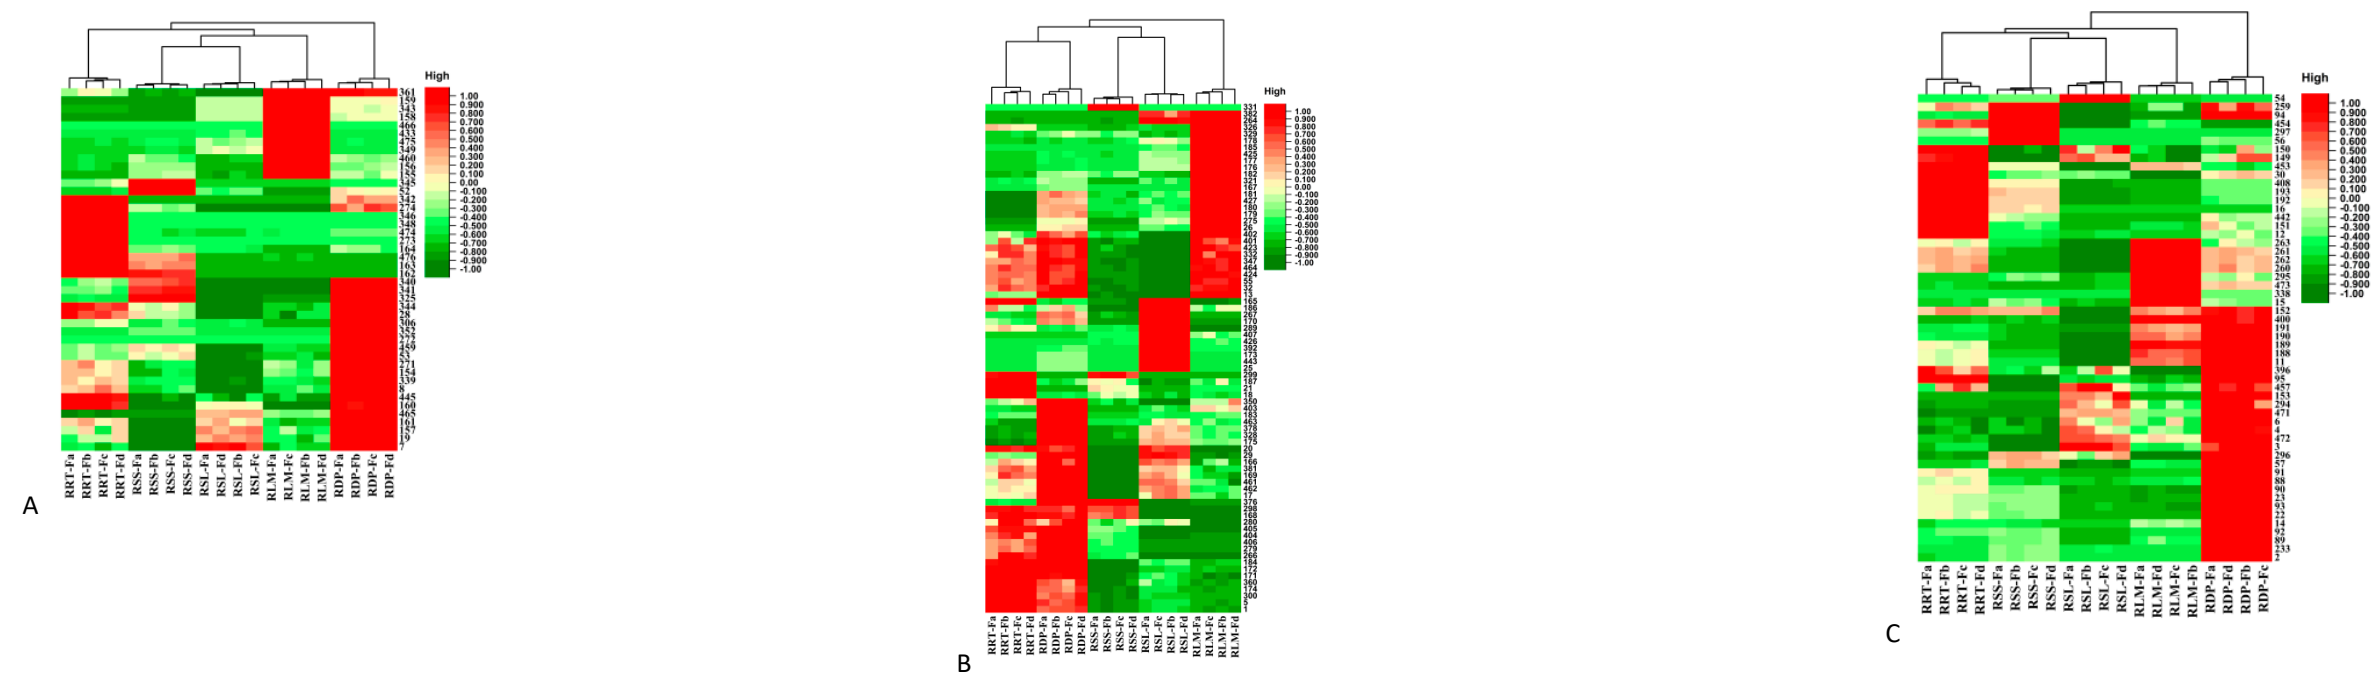



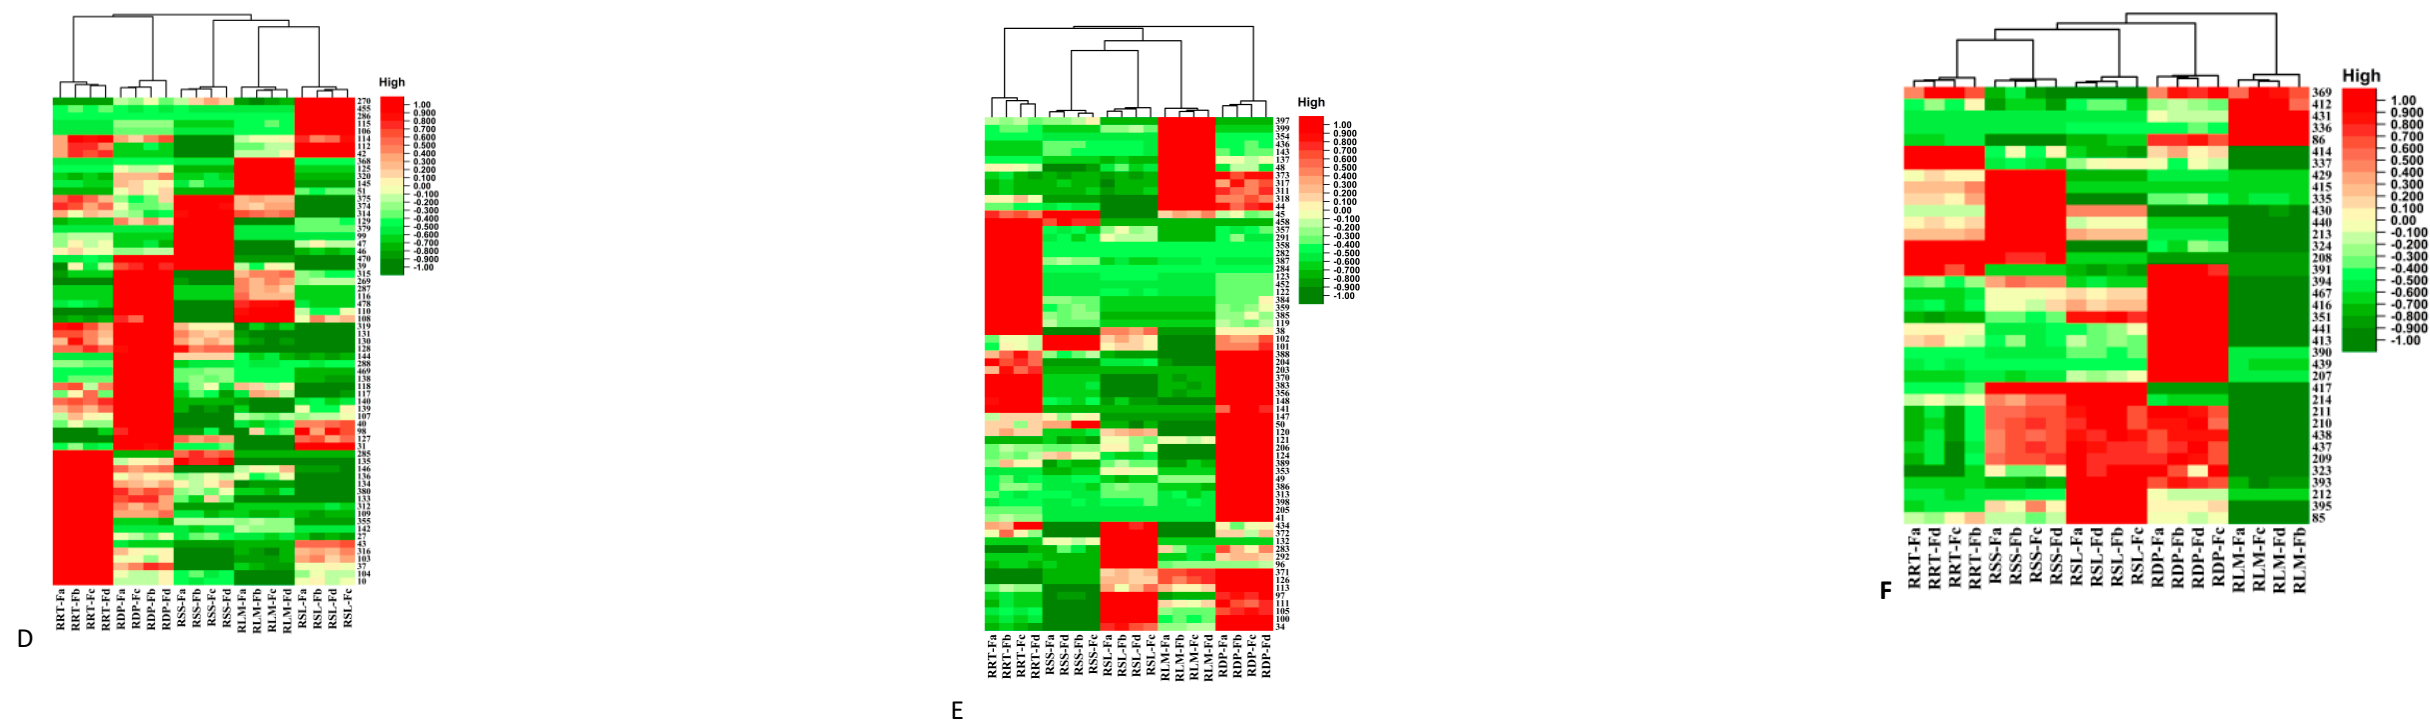

**Figure S2.** Heatmap of the relative contents of the differential metabolites of **(A)** flavones; **(B)** flavonols; **(C)** flavanones, isoflavones, anthocyanins, flavanones, proanthocyanidins and chalcones; **(D)** hydroxycyclic acid derivatives (HCs) and others phenolic acids (HAs); **(E)** hydroxybenzoic acid derivatives (HBs); **(F)** terpenoids. The numbers represent the compounds in **Supplementary Table S4**.

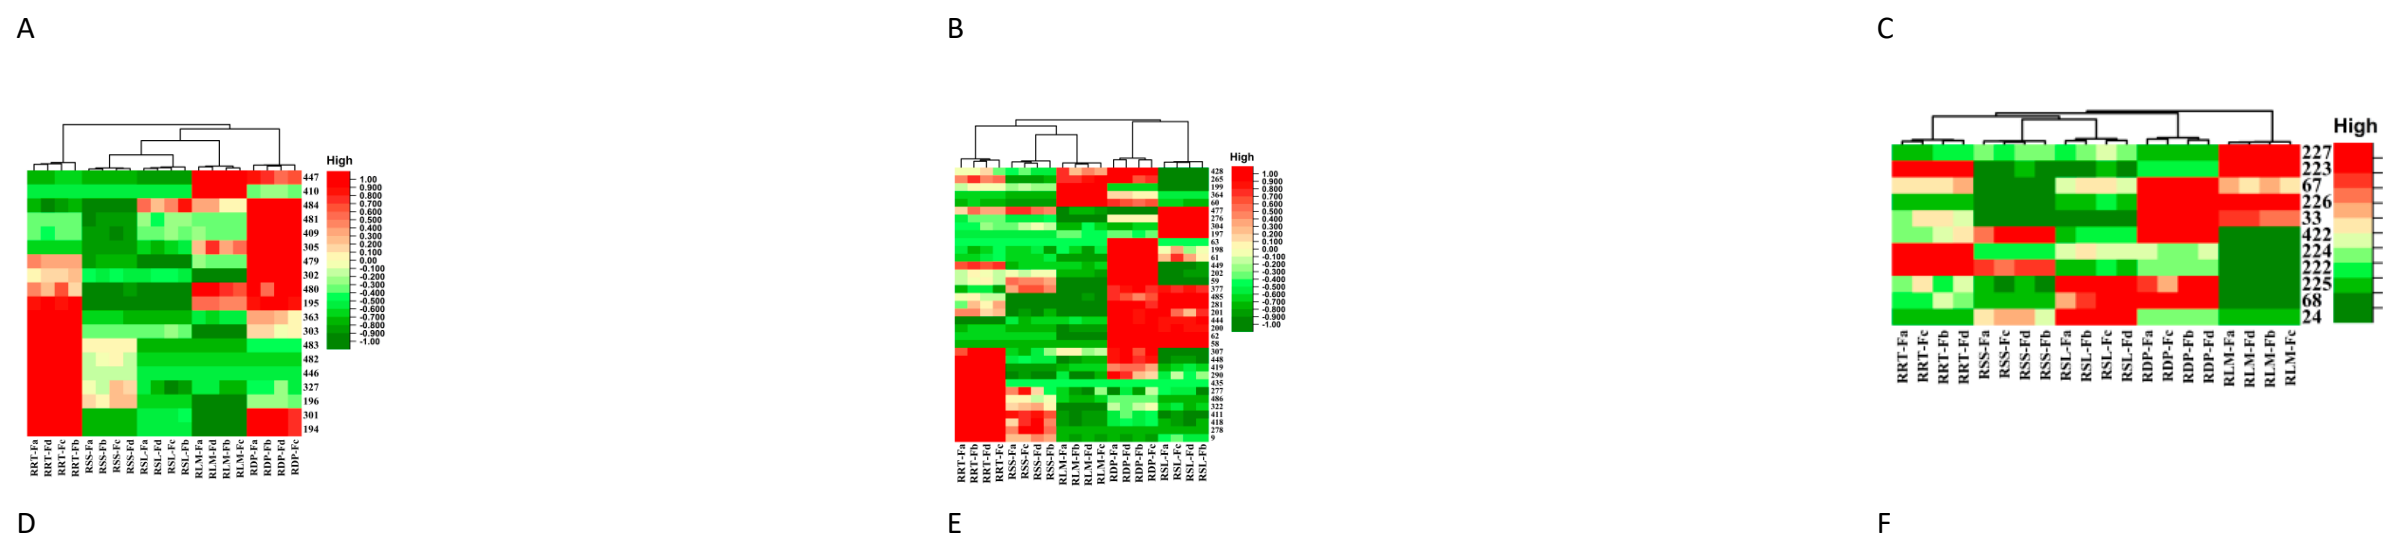

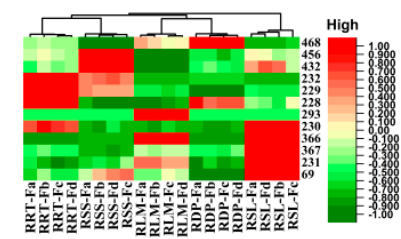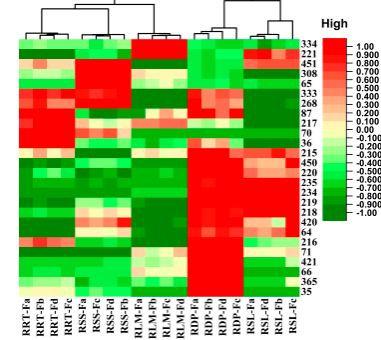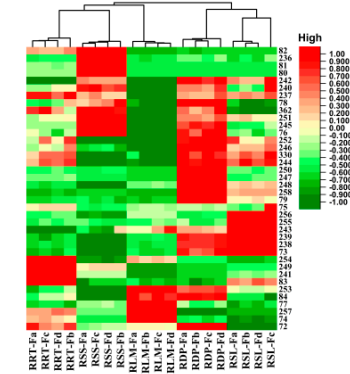

**Figure S3.** Heat map analysis of **(A)** lignans; **(B)** others; **(C)** vitamins; **(D)** coumarins; **(E)** alkaloids; **(F)** organic acids. The numbers represent the compounds in **Supplementary Table S4**.
